# Supplementary material for: Identification of m6A regulator-mediated RNA methylation modification patterns and key immune-related genes involved in atrial fibrillation
Source: Aging (Albany NY). 2023 Feb 20;15(5):1371–93. doi: 10.18632/aging.204537 (PMC10042702; doi:10.18632/aging.204537)
Supplement: Supplementary Figures [file aging-15-204537-s001.pdf]

SUPPLEMENTARY FIGURES

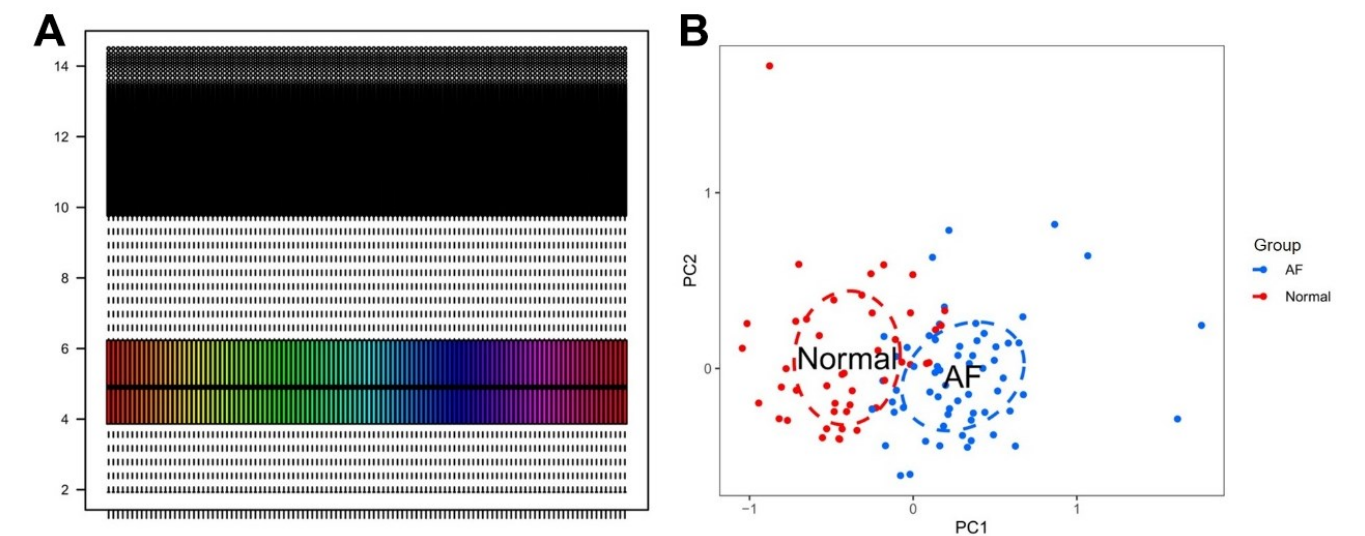

Supplementary Figure 1. Standardization and principal component analysis of all samples. (A) Normalized for all samples. (B) Principal component analysis for all samples.

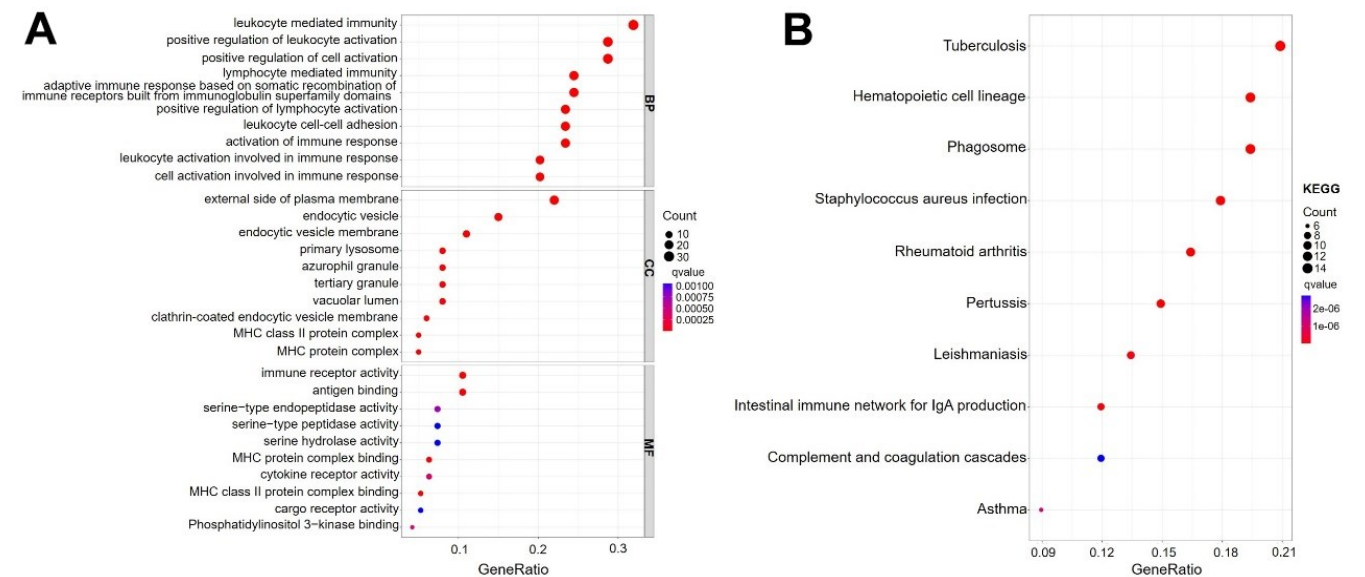

Supplementary Figure 2. Enrichment analysis of the genes in the meaningful modules. (A) GO functional enrichment analysis. (B) KEGG pathways analysis. The gene number was represented at x-axis, the KEGG pathway and GO terms were presented at y-axis.

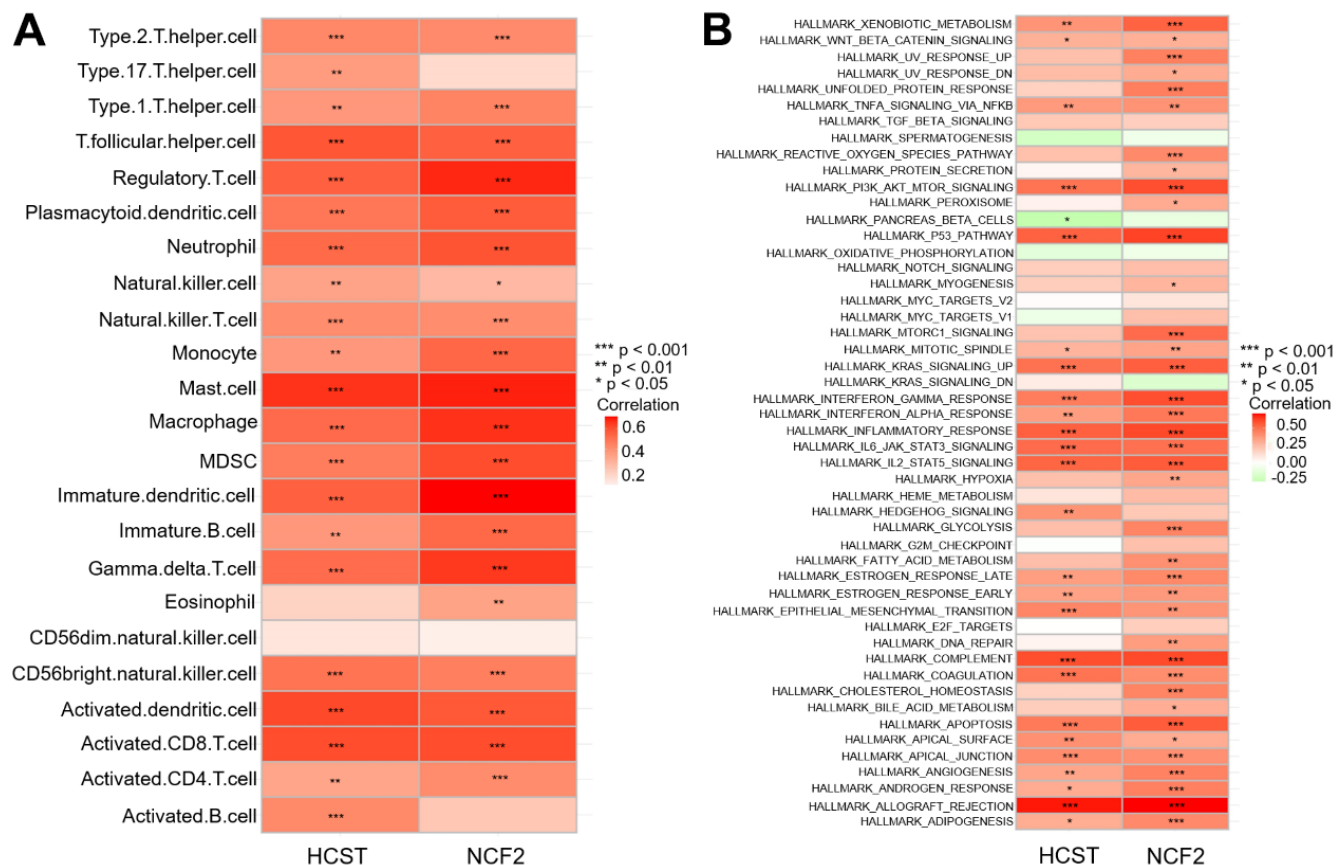

**Supplementary Figure 3. Heatmap of correlations between *NCF2* as well as *HCST* genes and infiltrating immune cells and 50 HALLMARKS pathways. (A) The relationship between infiltrating immune cells and the *NCF2* and *HCST* genes. (B) The relationship between 50 HALLMARKS pathways and the *NCF2* and *HCST* genes. \**P* < 0.05; \*\**P* < 0.01; \*\*\**P* < 0.001.**
