# Supplementary material for: Identification of m6A regulator-mediated RNA methylation modification patterns and key immune-related genes involved in atrial fibrillation
Source: publisher site journal article supplement (doi:10.18632/aging.204537), 2023-02-20
Supplement: Supplementary file [file aging-v15i5-204537-supplementary-material-SD9.pdf]

**Supplementary Table 8. The details genes symbols of several key genes identified by two distinct machine learning methods.**

---

Common elements in LASSO and SVM-RFE :

AMICA1  
BCAT1  
C16orf54  
C1QC  
CD14  
CD48  
CD8A  
CORO1A  
CXCL12  
HCLS1  
HCST  
HMHA1  
IGLV1-44  
LAPTM5  
NCF2  
TNFSF13

Elements only in LASSO :

C1S  
CASP1  
CD2  
CTSS  
GZMH  
HLA-DMB  
HPGDS  
ITGAM  
LCK  
LYZ  
MS4A7  
SLC7A7  
VAMP8

Elements only in SVM-RFE :

HLA-DRA  
LYN  
HLA-DMA  
LYVE1  
IGLC1  
CCL5  
CD163  
GIMAP2  
RNASE6  
MARCKS  
CCL19  
MRC1

---
