# Supplementary material for: Identification of m6A regulator-mediated RNA methylation modification patterns and key immune-related genes involved in atrial fibrillation
Source: Aging (Albany NY). 2023 Feb 20;15(5):1371–93. doi: 10.18632/aging.204537 (PMC10042702; doi:10.18632/aging.204537)
Supplement: Supplementary Table 1 [file aging-15-204537-s002.xlsx]

## Sheet: Sheet1
Supplementary Table 1. The expression profile of the 21652 genes in the datasets of GSE31821, GSE41177, GSE76796 and GSE115574.
geneNames	GSM789270	GSM789273	GSM789271	GSM789272	GSM789274	GSM789275	GSM1005418	GSM1005420	GSM1005422	GSM1005424	GSM1005426	GSM1005428	GSM1005430	GSM1005432	GSM1005434	GSM1005436	GSM1005438	GSM1005440	GSM1005442	GSM1005444	GSM1006245	GSM1006247	GSM1006249	GSM1006251	GSM1006253	GSM2102198	GSM2102199	GSM2102200	GSM2102201	GSM2102202	GSM2102203	GSM2102204	GSM2102205	GSM2102206	GSM2102207	GSM2102208	GSM2102209	GSM2102184	GSM2102185	GSM2102186	GSM2102187	GSM2102188	GSM2102189	GSM2102190	GSM2102191	GSM2102192	GSM2102193	GSM2102194	GSM2102195
A1BG	6.26746	6.11331	5.17899	6.10435	6.51774	5.80935	5.69776	6.23095	5.64693	6.07829	6.10319	6.19358	6.07924	5.91389	5.6661	5.92296	5.64445	5.61874	6.1857	5.74868	6.02042	6.16901	6.55432	5.99428	6.00728	6.03088	6.39993	5.08305	5.73486	6.01356	5.78376	6.54993	6.16756	5.85092	5.98378	4.96273	5.46371	5.78792	6.12073	5.49507	6.76055	6.2322	6.63049	5.84569	6.2585	5.84569	6.07407	6.03898	5.52409
A1BG-AS1	4.4997	5.15759	4.77589	4.46997	4.6456	3.96956	4.53186	4.32571	4.32665	4.13267	4.62017	4.75229	4.61359	4.56223	4.70838	4.66086	4.64999	4.7229	4.59367	4.86227	4.51932	4.55264	4.5073	4.49013	4.72602	5.46676	4.29935	4.03678	4.69497	4.82214	4.45439	4.63676	5.21985	4.77048	3.85424	4.21818	4.43151	4.39735	4.65696	3.97954	5.21961	4.79698	4.40075	4.22612	4.17727	4.75044	4.21839	4.66412	5.00131
A1CF	3.43265	3.90553	3.70672	3.24585	3.54699	3.33278	3.52655	3.3792	3.48441	3.64513	3.4895	3.5167	3.51028	3.46787	3.4634	3.51954	3.44204	3.4513	3.3928	3.52236	3.31617	3.34514	3.38495	3.36502	3.49724	3.7397	3.53781	3.6442	3.67152	3.61726	3.82342	3.79137	4.03286	4.36345	3.4706	3.92612	3.27222	3.01383	3.44048	3.5167	2.90772	3.2407	3.39966	3.17835	3.57415	3.63152	3.4895	3.35596	3.4908
A2M	8.31207	8.21515	8.05963	7.6064	7.68773	7.65714	7.85696	8.74318	7.83157	7.91183	8.06293	8.05722	7.91042	8.00232	8.00782	8.10058	8.06735	8.01811	7.93651	8.12597	7.93431	8.08328	8.09618	7.93727	7.90093	8.26071	7.70561	7.43755	7.04105	8.43887	7.76817	7.93431	7.2449	8.21515	7.20335	7.77734	7.82486	8.34263	8.05165	8.54618	7.60575	8.24087	7.92014	8.22584	7.34136	8.06553	7.64989	8.61737	8.45682
A2M-AS1	7.25636	6.02483	7.41898	6.7894	7.57903	6.52026	7.08587	7.52798	7.06653	6.82222	6.39265	6.47437	6.62649	7.08881	6.73716	6.79595	6.82336	6.69651	6.76926	6.87112	6.74814	6.66523	6.47112	6.9342	6.88089	6.14668	7.38078	6.35557	7.2109	6.42052	6.80054	6.62393	6.89654	7.33527	7.20596	6.26947	7.01896	6.18283	5.44501	7.14061	7.02033	6.95882	6.87611	7.05374	7.42629	7.01383	8.13982	6.75096	7.40584
A2ML1	3.32551	3.43135	3.08656	3.33839	3.52363	3.32015	3.37358	3.18359	3.38671	3.30074	3.25566	3.33995	3.29415	3.2461	3.23705	3.23507	3.26903	3.31562	3.34675	3.42307	3.38117	3.42478	3.35338	3.27733	3.54744	3.84018	3.53889	3.59821	3.29641	3.21376	3.70256	3.40035	3.47763	3.42587	3.43221	3.68509	3.60831	3.08117	3.19075	2.67935	3.50663	3.10819	3.33602	2.78109	3.46744	3.52916	3.06363	3.38429	3.26472
A2MP1	3.46767	4.29225	3.79402	3.49915	3.87114	3.9008	3.82531	3.66346	3.79503	3.88154	3.85749	3.84518	3.85943	3.64218	3.59637	3.72764	3.67226	3.80223	3.69249	3.6867	3.58605	3.69816	3.66324	3.55736	3.81632	3.87017	4.25252	4.02462	3.42307	4.16093	3.93025	4.09498	4.65291	3.37155	3.98455	3.94529	4.1668	2.89343	4.08357	3.2077	3.66188	3.75384	3.78637	3.89571	3.4787	3.70282	3.74044	3.60641	3.4893
A4GALT	5.85742	6.37317	5.88717	6.37656	6.24941	6.28102	6.07319	6.21812	6.14911	5.98854	6.08994	6.21718	6.16327	5.98255	5.96421	6.05131	6.0563	6.2619	6.20907	6.47021	6.31503	6.49797	6.5105	6.51298	6.16206	7.07658	6.31674	5.86418	5.95382	6.81927	6.46815	6.77223	5.75607	6.26691	6.13868	5.93253	6.18041	6.02561	6.58938	5.88888	6.11095	5.95076	6.02014	6.00102	5.69857	6.08365	6.02404	6.12719	6.42504
A4GNT	4.0761	4.91319	3.93213	4.28604	3.77178	4.12898	4.32781	4.32303	4.34243	4.3574	4.07672	4.0796	4.16287	4.14961	4.17783	4.3143	4.13458	4.03123	4.1882	4.08449	4.07034	3.80866	3.58115	4.27988	4.26378	4.47133	4.55529	3.90418	3.8841	4.33344	5.06476	4.16093	4.27672	4.68781	4.38413	4.29975	4.41036	3.62272	4.00813	3.69511	3.57257	4.42549	4.22893	3.98249	4.58614	4.11858	3.83569	4.20961	4.11982
AA06	3.99663	4.03639	4.27708	3.56903	3.79619	4.08339	4.06258	3.89682	3.95598	3.86575	3.79273	4.09764	3.87383	3.73603	3.81228	3.86059	3.81416	3.90572	3.92311	4.12532	3.96585	4.07725	4.12761	4.03567	3.99307	4.29689	4.12915	4.11454	3.60187	3.9157	4.23272	4.03639	3.4547	3.58958	3.51646	3.96063	3.69836	3.66405	4.03931	3.79082	4.13796	3.80755	4.18048	3.62726	3.83373	3.52301	4.03741	4.38488	4.52122
AAAS	6.24741	7.15115	6.42764	5.84433	6.25723	6.43194	6.52727	6.39779	6.63968	6.32723	6.51223	6.57383	6.51188	6.38203	6.30082	6.39338	6.40301	6.38808	6.36978	6.63412	6.34525	6.77341	6.48601	6.16206	6.49759	6.48277	6.90043	5.81248	5.96506	6.46924	6.70137	5.56325	6.21124	6.34616	6.15897	6.57792	6.6187	6.34058	7.36015	6.58874	6.12044	6.28733	6.30859	5.96449	6.22131	6.38954	6.42437	6.68108	7.19171
AACS	6.04691	6.9334	6.69182	6.94115	6.07228	7.24124	6.44426	6.54666	6.7123	7.03892	7.06052	6.51413	6.41477	6.59563	6.67783	6.28901	6.79851	6.38562	6.5105	6.66632	6.57232	6.77265	7.44778	6.44563	6.50157	6.93384	6.54516	7.59064	7.13046	6.7115	6.54556	6.71788	7.41602	6.38562	6.39847	6.68393	6.28599	6.58874	6.58672	7.03708	6.13295	7.21301	6.27804	6.05931	6.21871	7.04059	6.26947	6.43344	6.01356
AACSP1	2.73744	3.19463	2.76817	2.64426	3.16188	2.72915	2.71965	2.69149	2.91241	2.98133	2.79578	2.79935	2.81461	2.98024	2.87529	2.90161	2.87434	2.7486	2.93131	2.88267	2.8722	2.87343	2.66426	2.90449	2.99489	3.19463	2.55384	2.78013	3.1366	3.18891	3.05779	3.31286	2.88096	2.69149	3.0819	2.64901	2.83805	3.05569	3.01074	2.82627	3.07297	2.54386	2.86137	2.99437	2.78451	2.56272	2.39047	2.8888	3.04819
AADAC	3.77855	3.65474	4.59878	4.78025	4.40584	5.03068	5.79322	4.18801	4.80117	4.91319	3.72114	5.1538	4.44228	3.47847	3.73913	4.3354	3.8858	4.26605	3.72418	4.09535	4.35474	5.08811	4.86955	3.77178	4.51707	5.1884	4.00044	7.29896	6.02376	4.47682	3.26669	4.87214	4.1733	5.84399	5.37258	5.45609	4.17685	5.47596	3.96563	3.54744	4.25399	4.51665	3.10022	4.66477	3.42478	4.84303	3.50108	4.20158	3.58494
AADACL2	2.82462	3.04282	2.593	2.78109	3.18383	2.80183	2.69425	2.72915	2.78145	3.04358	2.91298	2.85953	2.87682	2.76613	2.81829	2.67976	2.71776	2.76853	2.92547	2.97568	2.83739	2.95427	2.63561	2.97704	2.5712	3.58069	2.9431	2.846	3.36384	2.95251	3.24659	2.79342	2.7882	2.95283	2.83296	2.69693	2.73277	3.08443	2.66645	2.62558	2.53386	2.96764	2.69621	2.76125	2.75951	3.40035	2.76125	2.71851	2.55384
AADACP1	3.17561	3.06178	3.46386	3.26497	3.19367	3.56403	2.93154	3.47363	3.53719	3.84225	3.03645	3.146	3.16188	2.84149	3.02511	3.32735	3.10659	3.25566	3.97862	3.21689	3.79817	3.31536	2.8243	3.72946	2.94199	3.1277	4.3499	3.14084	3.55921	3.11283	3.2259	2.88505	2.87284	2.4997	3.02562	2.81274	3.06414	4.75044	4.1374	2.56439	2.8691	3.30536	3.80711	3.09764	3.21326	3.76594	4.2598	2.82462	3.18695
AADAT	4.19445	4.42531	4.22377	5.05233	3.95071	4.96147	4.79211	4.49528	4.67418	4.67658	4.52103	4.32722	4.4926	4.64464	4.34429	4.37761	4.4019	4.26115	4.35027	4.21029	4.3508	4.56164	4.54326	4.72892	4.74711	3.87287	4.90615	4.36757	4.51606	4.31806	4.84806	4.44583	4.55114	5.05489	4.50515	3.94304	5.14484	4.21664	4.57252	4.60557	4.12324	4.47133	4.06415	4.84303	5.16027	4.77475	4.75837	4.16716	3.83953
AAED1	6.88263	7.88558	7.82486	6.72023	6.67403	6.50199	6.69612	5.91225	6.90976	7.25023	7.33748	7.08292	7.41958	7.21146	6.92292	7.20596	6.90805	7.18707	7.42567	6.66941	7.20596	7.23864	7.18326	7.06936	7.20596	5.45682	6.08611	6.63898	6.86765	7.09671	7.30633	7.57719	7.1207	6.39642	6.79434	7.20542	6.82829	7.63896	7.80883	6.85447	7.04241	7.37101	7.81395	6.74385	7.52391	7.03332	6.62861	7.26112	6.47183
AAGAB	4.72539	4.40154	4.81022	4.99104	4.63335	4.98227	4.76889	4.73496	4.64818	4.78425	4.7827	4.81022	4.81126	4.63378	4.66046	4.62172	4.62615	4.71208	4.67696	4.79597	4.6438	5.0288	5.17396	4.82513	4.70554	5.24528	4.97127	5.02796	4.63414	4.91736	4.82179	4.78744	4.59348	4.54387	4.50553	4.61397	4.73516	4.40541	4.72112	4.41057	4.76431	4.60131	4.94523	4.67282	4.91524	4.85743	4.9169	4.47799	4.7135
AAK1	5.47974	5.6661	6.55812	5.35344	5.697	5.131	5.67392	5.53398	5.58676	5.5614	5.55489	5.71906	5.61054	5.48411	5.5612	5.59519	5.51115	5.62686	5.56651	5.82029	5.54657	5.59064	5.63107	5.67622	5.5097	5.98994	5.63265	5.69565	5.52313	5.68221	6.08215	6.29121	6.13058	6.31809	5.29473	5.70626	5.39525	5.39095	5.6668	5.13542	5.68221	5.60044	5.65728	5.11899	5.33651	5.21262	5.1902	5.54897	5.49159
AAMDC	6.23003	6.36029	6.91147	6.31213	6.10977	6.94594	6.69105	6.83121	6.69818	6.49295	6.24969	6.39441	6.45661	6.17778	6.17721	6.14519	6.1983	6.151	6.21094	6.39375	6.27715	6.61255	6.66078	6.65039	6.39087	7.22361	6.96141	6.14091	6.92101	6.49797	6.42261	6.11418	5.88164	6.83971	6.55999	6.74738	6.76553	5.97698	6.18165	6.15437	6.50451	6.59006	6.44877	6.36111	6.27427	6.65883	6.76476	6.39409	6.48629
AAMP	7.31757	6.97506	7.44952	8.01627	7.67985	7.98925	7.38078	7.88404	7.34024	7.56358	7.38541	7.6973	7.48618	7.5827	7.60208	7.59248	7.68643	7.48992	7.38424	7.70561	7.55125	7.75039	7.85327	7.62559	7.57957	6.84995	7.35293	7.15492	7.10728	7.93959	7.86125	7.62721	6.92101	7.7333	8.07577	7.83751	7.37899	7.45315	7.81986	7.59761	7.1962	7.73957	7.85774	7.72161	7.64261	7.24381	7.03572	7.00154	7.63617
AANAT	2.81728	3.22568	3.93904	3.32482	3.63255	3.45508	3.4619	3.42704	3.61687	3.57014	3.31757	3.29641	3.31779	3.42326	3.39046	3.42391	3.40443	3.44161	3.37336	3.54791	3.36286	3.1744	3.4634	3.29783	3.2794	3.37203	2.89461	3.42326	3.81783	3.95109	3.20859	3.3856	3.74338	3.21758	2.94172	2.84901	3.2893	3.23635	3.25588	3.62149	3.17934	3.94588	3.4209	3.88912	2.92797	3.84292	3.66679	3.5865	3.54203
AAR2	7.23766	7.17933	6.96362	6.67084	6.48388	6.88053	7.02816	5.69671	6.97241	6.89695	6.97463	7.04105	6.94594	6.88531	7.10675	6.98453	7.11217	7.02544	6.88624	7.17464	6.87405	7.18868	7.1458	6.94194	6.93896	7.04937	6.85371	7.17067	7.07857	7.04196	7.23555	7.078	7.21146	6.93101	7.30846	7.24124	7.30139	6.60441	6.42293	6.64446	6.55502	6.80177	6.46595	7.00295	6.88745	6.7002	6.56154	6.11391	6.76886
AARS	7.88102	8.8889	8.15488	8.63548	8.34447	8.33168	8.48512	7.98163	8.60247	8.62126	8.52099	8.56038	8.13284	8.42822	8.46784	8.48512	8.54505	8.43127	8.35151	8.61871	8.33862	8.82813	8.77892	8.36998	8.45164	8.92313	8.8889	8.2903	8.4882	8.59387	8.72422	8.25603	8.09886	8.96116	8.68176	8.51553	8.78717	8.3564	8.21944	8.48926	8.21135	8.41999	7.9548	8.19373	7.75329	8.40792	8.09354	8.31207	8.6423
AARS2	5.95382	6.21211	6.3269	5.74028	5.74268	6.09422	5.96563	6.13709	5.94905	6.08333	5.92884	6.00756	5.88387	5.96077	5.93774	6.0044	6.03455	5.88084	5.86226	6.04806	5.88387	6.04356	6.10046	6.03724	5.98506	6.63526	6.22781	6.15531	6.06328	6.49191	6.1663	6.18541	5.9068	6.82376	5.79024	5.80721	5.74966	5.26597	5.82824	6.10198	5.8091	5.91411	5.7961	6.08761	5.58749	5.90369	6.05217	6.05688	6.05012
AASDH	6.91747	5.48934	6.43735	5.73408	6.31471	5.99494	5.97665	6.02968	6.07605	5.97725	6.12073	5.98854	5.98111	6.24874	6.11768	6.13089	6.07491	6.25347	6.16206	6.19865	6.19797	5.79158	5.85507	6.0563	6.15988	5.34105	5.73486	6.16539	6.2529	5.80024	6.00494	6.72434	6.94772	6.05382	6.69818	5.99578	6.10046	6.05012	5.72857	6.14787	5.98854	6.57347	5.95812	5.90342	7.01304	6.04578	6.65453	6.05131	5.08305
AASDHPPT	6.49867	6.13144	6.49328	5.91823	5.93427	5.90047	6.08426	5.76822	6.09743	6.20175	6.09743	6.00937	6.03118	6.23403	6.07516	6.15924	6.16206	6.13709	6.18196	5.83163	6.118	6.03781	6.02511	6.14519	6.16237	4.54387	5.48794	6.52764	6.17721	5.47899	5.81685	6.62293	6.59955	5.22816	6.15988	5.97917	5.9745	6.01499	6.30635	6.46415	6.38985	6.45861	6.10977	6.11656	6.92593	5.95672	6.46415	6.30139	6.13177
AASS	5.26875	5.1713	5.57331	5.05685	5.80511	3.97216	5.20559	4.65349	5.02675	5.13679	4.98126	4.67418	5.00343	5.54946	5.03611	5.07014	5.16689	5.02965	5.10637	4.44939	5.05037	4.64839	4.72132	5.37581	5.21694	3.97477	4.19752	4.86895	5.07607	3.96822	4.38183	5.84896	6.87288	4.88946	4.84958	5.30908	5.39545	5.41245	5.08075	5.90571	5.45009	5.19847	5.23238	5.18353	4.99041	4.94419	5.30058	4.89893	3.4881
AATF	7.17732	7.59064	7.29219	8.34168	7.57008	8.01467	7.84649	7.94112	7.76229	7.79034	7.81179	7.99711	7.79819	7.64261	7.78642	7.84336	7.76094	7.83075	7.73611	8.08161	7.77076	8.00616	7.83751	7.57391	7.67399	8.26272	7.97693	7.37441	7.67717	8.12597	7.96568	7.84873	7.39456	8.13458	7.73673	7.76298	8.15776	7.54208	7.59248	7.31191	7.57265	7.62108	7.67985	7.41373	7.17688	7.57903	7.48505	7.6064	8.46127
AATK	7.53881	7.56801	7.15742	6.58356	6.72992	6.93856	7.19779	7.09714	7.29	7.03529	6.8067	6.97601	7.02115	6.96971	7.06142	7.14061	7.06183	7.04378	7.05788	7.36804	7.00821	6.97064	6.85754	7.03892	7.1112	6.95619	7.13956	6.44741	6.2507	7.47896	7.5394	7.78762	6.97419	7.37276	6.12352	7.27474	6.63898	6.43769	7.17583	7.37899	5.94388	7.12025	7.35774	7.35502	7.0038	7.39115	7.34793	7.51461	7.81253
AB488780	6.13626	6.45567	5.90542	6.17417	5.9251	6.07634	5.96047	6.29313	6.0578	6.17838	6.06204	6.1823	6.03635	6.0873	6.15747	6.26289	6.21004	6.13777	6.08611	6.43344	6.15227	6.14183	6.09481	6.20823	6.18999	6.10554	6.30329	6.4068	6.26947	6.39815	6.59773	6.07228	6.06985	6.70611	6.23249	5.80802	6.15747	5.66582	5.27201	6.22635	6.06956	6.24035	6.17476	5.90791	5.66556	5.7474	6.05417	5.6668	7.04378
ABAT	7.71958	6.07319	6.4969	6.72264	7.81701	5.95444	7.0489	6.86682	6.83463	6.92418	6.93384	6.42261	6.38735	7.21496	6.70649	6.65527	7.35293	6.8974	6.68851	6.84251	6.86817	6.55395	6.40543	7.19322	6.90412	5.76614	7.26789	6.18165	7.25588	6.76476	6.57751	6.50675	7.61662	7.29	6.98499	6.23688	7.64148	6.20143	6.31069	7.79749	8.21515	6.14278	6.27583	6.43271	7.0679	6.20232	7.43346	6.16182	7.57454
ABCA1	4.50493	5.69825	5.17723	5.08054	5.05489	4.24821	4.96003	5.06118	4.9538	4.96228	5.1713	5.07964	4.87498	5.05144	5.13058	5.18353	5.1076	4.88412	5.08471	4.63919	5.08811	4.81791	4.70859	4.80034	4.89051	4.00852	4.61819	5.30345	5.14657	4.51259	3.99992	4.32036	5.23112	4.98716	5.06202	4.99332	4.6409	5.5588	4.85182	5.48156	4.68724	5.88084	4.46842	4.97949	4.50883	5.43668	4.91077	5.23778	4.60754
ABCA11P	5.92374	6.05688	5.36487	5.79024	4.58912	4.974	5.51292	5.31268	5.6497	5.46488	5.51042	5.21286	5.46745	5.72077	5.43252	5.32157	5.44432	5.31067	5.44741	5.00343	5.52269	5.00088	5.07299	5.78061	5.66653	4.71918	5.80885	4.86227	5.45827	4.6009	5.20885	4.41803	4.81417	4.7547	6.0827	5.78037	5.78891	5.4229	4.6696	5.74397	5.91627	5.6505	5.76163	5.92016	5.76405	5.38398	5.90431	5.4271	4.28274
ABCA12	2.55818	2.58252	2.5919	2.67306	2.68846	3.08218	2.4016	2.65783	2.51263	2.76546	2.62919	2.70283	2.66683	2.58418	2.59043	2.58094	2.61987	2.76265	2.66683	2.77193	2.71423	2.94857	2.87714	2.64654	2.512	2.65706	2.72439	2.86723	2.94225	2.65668	3.05346	2.7078	2.30813	2.66883	2.66559	2.42062	2.47164	2.593	2.66683	2.95743	2.58148	2.68177	2.39047	3.16083	2.68472	2.87466	2.51405	2.83138	2.92628
ABCA13	2.52201	2.32683	2.66805	2.49675	2.47328	2.39834	2.48642	2.5106	2.2865	2.3531	2.2865	2.25546	2.22243	2.26922	2.26054	2.12363	2.19745	2.34897	2.31821	2.31821	2.3738	2.42687	2.40443	2.41498	2.17478	2.66764	2.16068	2.66346	2.51131	2.57776	2.58475	2.64474	2.36176	2.43586	2.55384	2.53447	2.46524	2.4426	2.50192	2.47164	2.44161	2.68846	2.43039	2.45731	2.73166	2.35549	2.45227	2.29802	2.52059
ABCA17P	4.64229	5.5119	4.5235	4.26362	3.8961	4.45439	4.20924	4.2318	4.55264	4.49819	4.27005	4.15515	4.37356	4.18968	4.19809	4.14386	4.1715	4.41208	4.64781	4.53687	4.24721	4.66007	4.72686	4.36575	4.5977	5.232	5.09587	3.92311	4.67621	4.36212	4.00594	4.88623	4.28185	4.12819	4.1715	4.48798	4.17446	3.85087	4.46429	4.4394	4.7884	4.72313	4.43209	4.77294	4.30347	4.67217	5.20175	3.94374	4.25708
ABCA2	4.65416	5.42691	4.72094	4.45523	4.75488	4.78779	4.66335	4.34054	4.72164	4.87397	4.93476	4.94545	4.95499	4.75143	4.76934	4.76154	4.80961	4.81103	4.78779	4.95786	4.77145	4.85063	4.84024	4.7248	4.80836	5.16451	4.99832	4.10087	4.56282	5.15819	4.68522	4.95133	4.40905	4.78779	4.94088	4.62821	4.75163	4.8384	5.09206	4.86605	4.19827	4.50199	4.49987	4.80057	4.45019	4.46429	4.47269	5.289	5.39762
ABCA3	6.11682	6.92513	6.47112	6.19067	6.37867	6.35274	6.43701	6.76012	6.41822	6.36418	6.34123	6.50947	6.4539	6.08611	6.30266	6.39297	6.28432	6.34158	6.16539	6.48601	6.22385	6.77837	6.91747	6.31382	6.18447	7.31191	6.30571	6.21306	5.88191	6.90976	6.71709	6.57979	6.29507	6.73779	6.35959	6.09743	6.08488	6.12288	6.35824	6.13903	5.77302	6.2222	6.35309	6.50774	6.25226	6.67283	6.16355	6.71634	6.95968
ABCA4	3.63423	3.96861	4.06112	3.71805	3.30354	3.84579	3.44464	3.35731	3.56693	3.75695	3.6461	3.77097	3.68943	3.82531	3.78911	3.75282	3.88912	3.77394	3.78708	3.90672	3.71309	3.74185	3.72967	3.75037	3.64171	3.51782	4.04606	4.06894	4.00594	3.60787	4.27127	3.78055	3.5215	3.54677	3.52976	3.69171	3.71627	3.53123	4.04511	4.0156	3.76232	3.58241	3.61028	3.146	3.59348	4.02556	3.3294	3.43772	4.21534
ABCA5	5.01563	4.55079	5.49214	4.7964	5.20782	5.52386	5.55321	5.50258	5.38353	5.34869	4.94773	4.47508	4.91524	5.15739	4.95234	4.78623	4.88542	4.85498	5.04687	4.48014	5.23393	5.22753	5.2685	5.01957	5.28835	4.49139	4.88128	5.71125	5.75047	4.25538	4.29114	4.73176	5.38465	5.26156	5.17919	4.88268	5.32794	5.22953	4.60031	5.25982	5.50845	5.26465	5.08095	5.40177	5.25069	5.23456	5.5635	4.86524	4.73621
ABCA6	4.86664	6.67122	5.62686	6.78857	6.29727	7.02164	6.13838	5.86499	5.96587	6.21532	6.19034	6.23095	6.10077	6.51374	6.48868	6.56675	6.36558	6.50745	6.62574	5.61433	6.55138	5.68621	6.04246	6.80826	6.57532	5.84546	7.33373	5.26022	6.40399	4.63013	5.31956	5.87002	6.51951	6.2602	7.07997	6.99407	7.42175	7.40045	6.52662	6.40509	6.44058	5.51344	5.63663	6.16182	6.82585	5.6962	6.90933	6.36285	5.26364
ABCA7	4.49568	5.76794	5.01859	4.98656	5.0221	5.41423	5.16792	5.0088	4.97478	5.01369	5.38616	5.19983	5.17962	5.1829	5.08158	5.09338	5.2685	4.93841	5.02965	5.21286	5.0123	4.96459	5.18509	5.17111	5.10339	5.83705	4.97027	5.06016	5.19529	6.08333	4.50861	5.13747	4.51765	5.76745	4.76013	4.67813	4.55043	5.3184	4.61803	5.29586	5.26341	5.2543	4.97421	5.21961	4.50493	5.21714	4.81813	5.88967	5.46394
ABCA8	5.44527	6.74114	5.64216	5.59669	5.81922	5.73514	5.69287	5.27789	5.84593	5.876	5.66011	5.67365	5.68498	5.83974	5.7047	5.80748	5.70335	5.71392	5.84847	5.77109	5.85563	5.99752	6.01183	5.93025	5.83948	5.91596	6.21306	5.54064	6.30052	5.06322	5.37671	5.90973	5.61501	5.96421	5.9917	5.81299	5.77569	5.83241	5.71954	5.93312	5.91362	5.80885	5.28454	5.49418	5.11475	6.22517	6.68775	5.71666	6.01838
ABCA9	3.75928	5.50258	4.61138	4.71707	5.06303	4.82101	4.71002	4.27816	4.59224	4.62172	4.49099	4.43015	4.41513	4.78935	4.81042	4.88685	4.76849	4.68063	4.67035	4.65696	4.838	4.73496	4.38488	4.63036	4.55382	3.89011	5.00175	4.49286	4.37604	3.6058	4.38432	4.01449	5.71054	5.6098	5.19155	5.11922	4.98272	5.26573	4.74859	4.61783	4.16455	4.18253	4.17466	4.49892	5.11333	5.03782	5.77005	3.89167	4.81167
ABCB1	4.00431	3.31593	4.0301	4.30086	3.22682	3.53667	3.89338	3.57077	3.63172	3.8858	3.93347	3.65134	3.755	3.76819	3.68267	3.63884	3.63724	3.79619	3.68691	3.4511	3.81988	3.97645	3.8514	3.97193	3.50502	4.91382	3.87383	4.45543	3.83716	3.6867	3.5779	3.77314	3.62764	4.15476	3.76031	3.83244	3.61772	4.02423	3.18915	4.08638	3.63787	4.07234	3.76114	3.68072	3.40394	3.75461	3.40671	3.80127	3.61593
ABCB10	6.29024	4.81434	6.66823	5.76088	6.33123	5.83651	6.24405	6.51738	6.28262	6.03455	6.0636	5.45736	6.05716	6.19483	6.0268	5.73459	5.85171	6.02708	6.12501	5.03295	6.1857	5.5576	5.48038	6.07144	5.96219	4.16806	5.59814	6.92469	6.28469	5.2699	5.55905	5.25257	5.73903	5.06454	5.80642	5.97505	5.95382	6.65568	6.1866	6.15307	6.63128	6.09245	6.03838	5.96077	6.68028	5.80642	6.03426	6.07691	4.49492
ABCB11	3.69939	3.66521	3.55319	3.59306	3.39146	3.20301	3.28995	3.45389	3.20881	3.49506	3.46489	3.36598	3.43791	3.5241	3.49439	3.5079	3.45986	3.52874	3.50573	3.57939	3.61556	3.73891	3.74774	3.61048	3.47432	3.83104	3.53368	3.20859	3.68267	3.54658	3.52916	4.16568	3.48184	3.86857	3.71368	3.2154	3.69797	3.33532	3.64237	3.66305	3.25189	3.58136	3.65415	3.03511	3.38188	3.45625	3.28905	3.4996	3.62379
ABCB4	5.34503	4.96352	4.87758	5.38465	4.85763	5.04813	5.19593	4.27908	5.16428	5.38941	4.92299	4.74069	4.75895	5.29807	5.20239	5.16202	4.81523	4.95961	5.38128	5.19914	4.88503	5.51876	5.1205	5.5	5.22668	5.18927	5.23112	4.3572	4.81264	4.6706	4.54506	4.81434	5.12563	5.75638	5.50405	5.2148	4.95681	4.66998	4.49063	5.45153	6.08994	5.08243	5.29694	5.3063	5.86063	5.34824	5.72003	4.13151	4.12915
ABCB5	3.13365	3.146	3.15818	3.49188	3.35219	2.98318	3.11647	3.0775	3.10233	3.19165	3.1448	3.19734	3.13054	3.18004	3.18771	3.19345	3.21849	3.09511	3.19241	3.16233	3.18915	3.13935	3.13004	3.27199	3.16546	3.43685	3.656	3.36358	3.63004	3.29931	3.38715	3.13959	3.08218	3.59368	3.1272	3.22906	3.12292	3.48909	2.87796	3.11856	3.28041	2.96062	3.12142	2.78072	3.04358	3.12822	2.96174	3.08684	3.54441
ABCB6	5.03463	5.7011	4.94969	5.38774	4.86103	5.40627	5.24036	5.4391	5.28945	4.9429	5.23132	5.39481	5.20583	5.16202	5.19417	5.15966	5.23691	5.17223	5.17043	5.34238	5.20843	5.39481	5.66161	4.95746	5.03068	6.23066	5.62608	5.21131	5.19553	5.62483	5.1393	5.34082	5.0111	4.90193	5.15718	4.9884	5.03881	5.30908	4.85743	5.01387	5.56777	4.90249	4.9963	4.97748	4.84784	4.97557	5.18953	5.66285	5.40763
ABCB7	8.08328	8.2009	8.84558	7.44349	7.91919	7.88259	7.99143	7.18482	7.79614	8.19809	8.12597	8.07994	8.05079	8.19373	8.12597	8.11641	8.09101	8.09886	8.0971	8.11386	8.15293	8.19118	8.23514	8.09986	8.13624	8.16043	7.82207	7.93892	8.18757	7.71086	7.39456	8.43345	8.16471	8.08512	7.89478	7.97693	8.00057	7.40537	7.53463	7.75741	8.20848	8.34358	8.41692	8.02757	8.36894	7.98458	8.66778	7.38303	7.55995
ABCB8	4.79473	5.153	5.0614	4.56629	4.99309	5.01801	4.74962	4.9469	4.89809	5.05725	4.87173	4.8206	4.92013	4.89228	4.86103	4.91217	4.89518	4.87717	4.84506	4.97929	4.91134	5.10057	4.99812	4.88705	4.89031	5.46004	5.07076	4.63291	4.49492	5.25646	5.35295	5.28922	4.82864	5.37606	4.94403	4.83323	4.33712	4.58991	4.80986	4.92395	4.67479	4.80836	4.98372	4.55282	4.88645	5.12174	4.92673	4.82682	5.12196
ABCB9	4.61456	5.30674	4.73496	4.45565	4.64602	4.42493	4.80273	4.94463	4.80077	4.45724	4.49718	4.72256	4.52846	4.40286	4.43981	4.50982	4.42606	4.6017	4.46883	4.82804	4.74775	4.88601	4.97537	4.63133	4.63335	4.909	4.82273	4.56494	4.21839	4.95661	5.28629	4.77625	4.92962	5.07146	4.71979	4.67658	4.6476	4.63757	4.49646	4.41495	4.64581	4.44863	4.60557	4.14847	4.40498	4.53984	4.45685	4.68608	5.39138
ABCC1	6.12044	5.54368	6.39297	5.92209	6.27399	5.99606	6.08237	6.24101	6.30503	6.22064	6.0099	6.05599	6.06426	6.07516	6.07352	6.07862	6.05749	5.95701	6.00041	6.07772	5.98111	5.93632	5.82952	5.82484	5.92209	5.61156	6.41115	6.78336	5.71747	5.61669	6.05448	5.96704	6.26746	5.1534	5.83241	5.77541	6.07862	6.6767	6.34262	6.13323	5.30651	6.30169	6.19955	5.86418	6.25102	5.69201	5.87459	5.82112	5.81197
ABCC10	5.22442	5.80173	6.48935	5.42336	5.3437	5.74789	5.66977	5.84569	5.59135	5.47408	5.74028	5.67992	5.58426	5.58502	5.64423	5.65517	5.62281	5.6522	5.63081	5.82584	5.62731	5.64065	5.64571	5.65829	5.56375	6.18873	6.38203	6.58013	5.74892	5.86013	5.55321	4.90799	5.70159	6.04386	5.48156	5.08158	5.61107	5.64375	5.15759	6.10648	5.89577	5.38867	5.35245	5.65323	5.64116	5.72077	5.84288	5.48703	5.13611
ABCC11	3.31947	3.56322	3.87727	3.60261	3.67226	4.12073	3.62234	3.78597	3.59395	3.57099	3.58447	3.71746	3.50771	3.65095	3.60539	3.6568	3.63787	3.76335	3.65265	3.97806	3.53974	3.43618	3.64731	3.61877	3.63825	4.21289	3.9455	3.59326	3.33278	3.91053	3.86935	3.42178	3.76756	3.99844	3.89664	4.34919	3.9823	3.37094	3.74871	3.5283	3.58368	3.49938	3.77375	3.23311	3.65947	3.55679	3.21596	3.53103	3.98881
ABCC12	3.17765	3.30825	3.21326	3.00793	3.15596	2.98462	3.16648	3.6465	3.2361	3.07889	2.97758	3.14084	3.05704	2.97923	3.07272	3.06962	3.02668	2.99326	3.1803	3.13437	3.04951	3.05112	3.16546	3.10233	3.07889	3.43462	3.31638	3.07447	2.58039	3.03245	3.64773	3.21566	3.41667	3.47014	3.18848	3.34653	3.25497	3.12627	3.18148	2.98318	3.2368	2.85479	2.88766	3.23428	2.91873	3.05916	3.0124	3.24923	3.41289
ABCC13	2.95542	3.49294	3.23428	3.05294	3.03822	3.1376	3.13082	3.28041	3.18053	3.01573	3.07272	3.20551	3.14255	2.99642	3.01626	3.04654	3.08271	3.13437	3.17213	3.26176	3.12292	3.17684	3.10203	3.10097	3.10438	3.32622	3.23129	3.43836	3.02855	3.37029	3.68966	3.73168	2.88474	3.00228	3.04547	3.32823	3.11621	3.18537	3.08043	3.04682	3.32715	3.06229	2.93434	2.92547	3.03245	2.88641	3.11216	3.03745	3.45264
ABCC2	3.56403	3.45447	3.08418	3.56549	3.80071	3.5369	3.58156	3.85424	3.60811	2.98616	3.44525	3.54119	3.53955	3.44739	3.4511	3.49635	3.45964	3.3294	3.38406	3.43443	3.51232	3.11698	3.69956	3.51578	3.21758	4.00283	3.55273	3.53161	2.82334	3.25759	3.24493	3.04951	2.97254	3.80534	3.86995	2.89751	3.21736	3.2336	3.86115	3.96156	3.84948	3.57391	3.50879	3.7125	3.26111	3.77215	3.48612	3.5712	3.78497
ABCC3	4.91153	5.66879	4.98294	4.87279	4.85248	4.78145	4.94212	5.22206	4.85701	4.81753	5.08726	5.14307	5.07674	4.93595	4.93085	5.00025	5.04566	4.98821	5.0374	5.2214	5.00381	4.96438	5.07524	5.01859	5.019	5.21608	4.87478	4.70576	4.82742	5.77382	4.91933	5.10802	5.26341	5.3747	5.07649	4.99878	5.00678	4.6156	5.00487	4.84086	5.01821	4.63172	4.98901	4.76237	4.4468	4.85206	4.68162	5.65376	5.76822
ABCC4	3.28394	3.44398	3.75138	3.8717	3.92026	3.60745	3.34809	3.32038	3.28646	3.91939	3.69226	3.58796	3.7372	3.82983	3.67895	3.68509	3.6469	3.96995	3.75015	3.59202	3.69715	3.67033	3.56096	3.51359	3.59246	3.23456	3.10414	3.90713	3.50241	3.62234	3.79503	3.85214	3.5241	2.72875	3.98896	3.86935	3.10872	4.49511	4.15673	3.95071	3.76411	3.88856	4.11655	3.5628	3.86879	3.48869	3.31757	3.29117	3.35219
ABCC5	6.67822	6.52487	6.06086	6.09245	6.64481	5.8285	6.25382	6.04861	6.15282	6.28262	6.26634	6.17838	6.38063	6.51848	6.31004	6.34231	6.19764	6.19865	6.49191	6.21692	6.25788	6.18873	6.26691	6.33615	6.40365	5.45009	6.55586	5.64644	6.54886	5.43525	5.52725	6.53225	6.70964	6.01049	6.12993	5.94692	6.21463	6.38333	6.44563	6.67084	7.09162	6.8673	6.84129	6.31575	6.99407	6.14549	6.579	6.41791	5.71054
ABCC6P1	3.24122	3.44022	2.91614	2.91469	2.85743	3.58796	3.11892	2.88065	3.30602	2.96928	3.33839	3.09033	3.14974	3.08095	3.15526	3.01002	2.98434	3.03672	3.11571	3.04282	3.08575	3.11792	3.59177	3.0974	3.11792	3.40945	3.21255	3.25518	3.64152	2.86813	3.18592	3.27667	3.37644	2.38884	2.90161	3.33667	3.70913	3.10763	2.92519	3.22682	2.79009	3.02269	3.04308	3.17752	3.40081	3.4859	3.30487	3.11476	3.36643
ABCC8	4.92616	4.92239	5.289	5.05449	4.91361	4.48368	4.85206	4.66393	4.79251	4.77089	4.89247	5.02369	4.94382	4.82434	4.90675	5.02389	5.00175	4.84845	4.93636	5.18198	4.94251	4.85164	4.76237	4.91198	4.82642	5.8474	4.79759	4.3065	4.74573	5.47812	5.13314	5.14503	4.73391	4.53831	4.40806	5.1538	5.25069	4.71287	5.63081	4.85517	4.72216	4.67965	4.94669	4.68324	4.6009	5.07547	4.78329	5.25213	5.31138
ABCC9	4.23732	3.70449	4.98999	3.97625	4.53206	3.7869	4.05955	4.09734	4.29208	4.3619	4.21396	4.08049	4.1715	4.51204	4.17801	4.31257	4.25069	4.36362	4.29847	3.95758	4.33925	4.31163	4.16455	4.07794	4.27022	2.82397	4.05658	3.56654	4.45019	3.85884	3.59433	3.63724	4.15359	3.66188	4.29918	3.95446	4.35759	3.97933	4.00887	4.79907	4.64069	4.59427	4.76849	4.59842	5.27928	4.49735	5.18678	4.02556	3.95389
ABCD1	5.55687	6.25102	6.34586	5.33719	5.68573	5.91031	5.9466	6.20478	6.03515	5.73206	5.92117	5.98774	5.8566	5.61156	5.70136	5.82741	5.75286	5.77886	5.71174	6.01643	5.7606	6.04159	5.85563	5.71365	5.70306	6.44697	5.91564	4.89272	5.19847	6.34743	6.37964	5.82741	5.8392	5.90369	5.50277	5.78627	5.83678	5.60773	5.83836	5.59412	5.36423	5.81248	5.96803	5.45058	5.59519	5.7601	5.48225	5.89795	6.61679
ABCD2	3.0243	3.48268	2.90714	4.44501	3.9635	4.68643	3.99421	4.03639	4.42212	3.28883	4.15495	3.19576	3.59477	3.99069	3.91354	3.74712	4.03778	3.4182	4.08184	3.12268	3.91607	2.86752	2.85713	3.38537	3.99013	2.51701	3.37739	3.10576	3.91034	2.79997	3.43575	3.52236	4.53011	2.88474	4.22168	4.40752	3.6881	3.40304	3.51935	4.49798	3.61275	3.84831	2.7678	3.40328	4.11637	3.75185	4.51569	3.83061	3.98676
ABCD3	6.18105	7.06334	6.35856	7.313	6.33992	6.6843	6.69142	7.21447	7.00059	6.46096	6.72836	6.59006	6.85489	7.10512	6.66444	6.86389	6.81152	6.91195	6.88307	6.26874	6.9884	6.29476	6.1247	6.47507	6.96743	4.9429	5.49557	5.92637	5.76563	6.14638	6.83588	6.62612	6.83922	5.53449	6.47112	7.27585	6.80878	7.04984	7.07857	7.34301	6.86944	7.02495	7.22609	7.1168	7.31353	7.03384	7.06739	7.1158	6.59006
ABCD4	5.37858	5.03339	5.48726	5.11655	5.00235	4.97599	4.94364	5.42131	5.15322	5.23157	5.28363	5.17223	5.23348	5.13588	5.05955	5.04566	5.0732	5.13001	5.18331	5.20092	5.09929	5.38616	5.48748	5.21939	5.17043	4.56164	5.48508	5.52598	5.64423	5.30863	4.95278	5.20624	5.30998	5.12743	5.18702	5.27387	4.98799	5.08726	4.79738	5.19654	5.08471	5.84896	4.93416	5.29495	5.27106	5.37559	5.39717	5.26022	4.73072
ABCE1	7.72701	6.59263	7.45248	7.43592	7.39115	6.90851	7.40045	6.66192	7.3687	7.47896	7.34186	7.2873	7.31982	7.39867	7.38022	7.3561	7.36313	7.43996	7.4693	6.86125	7.41094	7.16033	6.97873	7.47116	7.32819	6.04331	6.16083	7.75039	7.45792	6.73779	6.95039	7.73268	7.76368	6.74067	7.10816	7.19418	6.82454	7.65714	7.47951	7.13956	7.80175	7.82718	7.74696	7.18815	7.86855	6.99593	7.46874	7.06142	6.64628
ABCF1	7.17365	7.71635	7.63107	8.32876	7.84057	8.47245	8.09028	8.87983	8.00705	7.96032	8.01966	7.98392	7.88799	7.734	7.98539	7.8655	7.92237	7.96032	7.83383	8.074	7.86329	8.10058	7.9931	7.79614	7.89478	8.5628	8.32098	7.92976	7.63825	8.23602	8.43887	7.66304	8.09182	8.55916	7.88799	8.07303	7.99792	7.68387	7.72161	7.72089	7.73611	7.59576	7.85696	7.45557	7.76368	7.734	7.7102	7.69927	8.22493
ABCF2	5.45983	5.48339	5.36307	6.16849	5.52072	5.81896	5.62906	5.54534	5.65195	5.76667	5.6915	5.73016	5.69932	5.68064	5.69097	5.73335	5.73042	5.72003	5.67072	5.86113	5.64041	5.80327	5.88506	5.77247	5.73594	6.35959	5.97365	5.14524	5.57687	5.48014	6.10349	5.48957	5.62019	5.79188	5.57216	5.92374	5.82144	5.52001	5.48201	5.65778	5.77643	5.49857	5.3702	5.85586	5.58374	5.34258	5.62731	5.55366	5.89603
ABCF3	7.52214	7.14819	7.75606	7.26789	7.34793	7.54608	7.37276	7.5105	7.34301	7.28437	7.45922	7.46154	7.44349	7.34186	7.40045	7.42567	7.39456	7.37552	7.28377	7.57781	7.31403	7.64653	7.75535	7.42629	7.27309	7.96259	7.69669	6.83211	6.86479	7.85696	7.90883	7.50993	7.07415	7.80682	7.32265	7.40977	7.36372	7.19462	7.50993	7.20433	7.28061	7.20335	7.2999	7.38541	6.62612	7.39404	7.40265	7.33046	7.87525
ABCG1	5.73645	5.94125	5.25911	5.52622	5.28655	4.43449	5.18331	5.18396	5.52527	5.58102	5.45915	5.30884	5.26093	5.45428	5.36976	5.48361	5.21068	5.32484	5.40468	5.37768	5.37534	5.25166	5.10014	5.3714	5.20799	5.1534	4.95919	5.67286	4.87717	6.27427	5.43059	5.25472	5.2999	5.3306	4.75143	3.93885	4.10951	5.36614	5.0976	6.26423	5.07816	6.17751	5.62069	5.24056	4.7127	5.59593	5.55076	4.96003	4.88167
ABCG2	5.65271	3.59224	5.07209	5.79705	5.8138	5.36172	5.40041	4.56245	5.07209	5.59341	5.42222	5.22338	5.07547	5.46723	5.20624	5.16368	5.61156	5.50526	5.16157	5.31998	5.42607	4.95702	5.37944	5.50479	5.23178	3.32363	5.35024	5.11697	5.2389	4.66233	4.82139	3.97495	5.59412	4.84044	6.15282	5.0188	6.13777	4.92299	4.61895	5.49745	5.64666	4.80943	5.54711	5.1696	5.91994	4.85288	5.5171	5.03946	5.57581
ABCG4	5.03339	5.46987	5.36152	4.95681	5.0719	4.40346	4.68487	4.86625	4.56282	4.69927	4.75874	4.86271	4.87857	4.78524	4.83128	4.99309	4.84044	4.68346	4.70362	5.00301	4.93863	5.06973	5.0442	5.2685	5.04014	5.3345	4.82903	5.03843	4.86683	5.10078	4.91443	5.59267	5.53347	5.33017	4.69966	4.64602	4.17819	5.26969	5.12763	4.1618	4.74379	4.77787	4.95481	4.55208	4.73621	4.83167	4.705	5.20715	5.26431
ABCG5	3.656	3.46076	2.69585	3.63512	3.35731	3.40035	3.23585	3.2976	3.3376	3.23033	3.37558	3.33886	3.38715	3.32735	3.36384	3.3769	3.39612	3.40584	3.45986	3.28528	3.44001	2.9531	3.45645	3.25875	3.35364	4.18403	3.39767	3.73761	3.39549	3.0927	3.35102	2.75076	3.0259	3.65095	2.91434	3.57872	3.05219	2.86137	3.30921	3.42744	3.31947	3.84579	3.38517	3.48633	3.23382	3.21492	3.544	3.60336	3.25783
ABCG8	3.7597	4.39716	3.92926	3.54379	3.6411	3.88639	3.8264	3.75117	4.0076	3.61575	4.10087	3.95937	4.03027	3.76292	3.85004	3.88856	3.82887	3.80554	3.68449	3.93408	3.94818	3.61189	3.5079	3.95904	3.73305	3.78911	4.09498	3.83042	3.51073	4.41822	3.83646	3.96804	3.53225	4.08812	3.43071	4.21235	4.33651	3.55445	3.97806	3.55659	3.74931	3.59177	3.98493	3.59975	3.69999	3.91727	3.42681	4.5022	4.22321
ABHD1	4.17747	4.25237	4.18763	4.69457	4.36093	4.84447	4.42313	4.71484	4.46923	4.50905	4.45685	4.51914	4.47036	4.34054	4.35375	4.41647	4.32182	4.3477	4.36812	4.63151	4.3499	4.2418	4.37642	4.51295	4.35514	5.22731	5.27767	4.00431	4.22251	4.41367	5.02815	4.70943	4.41247	4.89371	4.53492	4.37356	4.29559	3.8682	4.14056	4.33105	4.50746	4.27672	4.67322	4.01633	4.33593	4.39829	4.29991	4.13078	4.25596
ABHD10	7.10371	6.70217	7.96643	6.49357	6.55103	6.44845	6.85169	6.56339	6.82092	6.97374	7.00987	6.61107	6.79183	7.15588	6.85915	7.03139	6.93804	7.03139	7.00987	6.54299	7.03708	6.76703	6.68927	6.82299	7.07711	5.04143	6.42632	6.39744	7.00197	5.47573	6.22781	6.60026	6.71424	5.87836	6.85447	6.27905	6.43418	6.79219	6.99827	7.41958	7.21353	7.17021	7.09671	7.19224	7.76672	7.09066	7.51235	7.2109	6.84582
ABHD11	5.53993	5.30932	5.79999	6.41714	5.61741	6.59006	5.92749	6.32354	6.10077	5.85145	5.92691	6.01109	5.97698	5.98024	5.9533	5.8768	5.92454	5.79322	5.94632	6.14245	5.93253	5.88274	5.92807	5.89448	5.93717	5.61975	6.01527	5.2258	5.67732	6.32459	6.59263	6.07545	5.21173	5.73949	5.97337	6.29378	5.5265	5.06955	5.62956	6.16221	5.98774	5.89819	6.26815	5.83059	5.93923	6.29538	6.27459	5.99082	5.80721
ABHD12	5.80173	7.0361	5.98195	6.61711	6.6508	6.35757	6.39265	5.94244	6.41175	6.53516	6.60557	6.60366	6.60441	6.40197	6.47333	6.46815	6.43194	6.52412	6.48805	6.68071	6.39507	6.59738	6.68739	6.61601	6.49438	6.95968	6.73716	5.94879	6.3128	6.64114	6.45283	6.28632	6.11361	6.60993	6.28164	6.56301	6.79595	6.38237	6.42727	6.42293	6.37107	6.61067	6.5999	6.65805	6.11936	6.1857	5.81272	6.43591	6.69612
ABHD13	4.63811	4.86437	4.06355	4.43356	4.16961	3.79082	4.59087	4.1538	4.58495	4.70419	4.3732	3.80185	4.52969	4.60473	4.30693	4.4229	4.26155	4.52711	4.62347	3.11498	4.58912	3.9308	3.71746	4.41954	4.59149	3.11961	3.57415	4.56342	4.56934	3.22177	2.98641	4.00941	4.59463	3.06828	3.87114	4.55621	4.90209	4.52312	3.41601	4.96689	4.69754	4.79311	4.60969	5.15819	5.03128	5.03233	5.13847	4.13891	3.6957
ABHD14B	7.16586	7.60511	7.41841	6.7931	6.98184	8.24383	7.28946	7.19882	7.27309	7.09486	8.03522	7.57583	7.34847	7.29415	7.55874	7.35335	7.60391	7.46818	7.30633	7.67325	7.51104	7.95404	8.26456	7.10054	7.55196	8.31708	7.99143	7.31982	7.58815	7.75407	7.47176	6.70611	7.08978	7.87457	7.81986	7.66497	7.8986	7.35898	7.13855	7.68582	6.59418	7.52337	6.54194	7.36982	6.66409	7.52275	6.73383	7.60076	7.91612
ABHD15	4.83128	4.22015	5.0589	5.74244	4.95746	5.80963	4.81022	5.30406	4.97706	4.99263	5.65676	4.88946	4.88887	5.0614	5.16284	4.69695	5.2992	4.86083	4.92176	4.81243	5.31974	5.34869	5.23734	4.94849	5.11497	5.05489	4.84242	5.30079	5.29182	5.20302	4.25741	4.87838	5.38199	5.34684	5.20671	5.21521	5.00487	5.59387	4.78227	5.57687	4.62365	5.44478	4.05826	4.99309	4.77863	5.32321	4.19157	4.90675	4.63414
ABHD16A	5.82327	5.99373	6.13229	5.51319	5.5205	5.6382	5.8035	6.14435	5.83867	5.52313	5.79705	5.88274	5.82173	5.66633	5.70037	5.7331	5.69097	5.73672	5.72153	5.98228	5.73619	6.20073	6.07464	5.71125	5.62657	6.58833	5.93518	5.47367	5.89772	5.95104	5.7101	5.5865	5.51876	5.36195	5.5483	5.88137	5.71643	5.7494	6.0902	5.56325	5.64845	5.62779	5.51614	5.67443	5.56754	5.90737	5.72703	6.32068	5.77693
ABHD16B	4.49684	4.24537	4.40677	3.92651	4.04073	4.00174	4.21798	4.4995	4.06489	3.87945	4.25793	4.27059	4.36699	4.13497	4.12096	4.28437	4.16396	4.28144	4.22819	4.44999	4.24966	4.22236	4.01633	4.18615	4.28933	3.85197	3.63402	4.04116	4.4365	4.42642	3.81745	4.19157	3.56735	4.18744	3.63113	3.36687	3.59326	4.30274	5.19417	4.3153	3.77496	4.31071	4.49929	4.50084	4.35759	4.48744	4.92239	4.42513	4.6979
ABHD17A	8.59882	9.00414	8.54004	9.4359	8.5437	9.78472	8.8719	8.9725	8.91173	8.96589	9.14999	9.23441	9.13771	8.9725	8.99113	9.09096	8.9743	9.26248	8.93773	9.28795	9.15801	9.43084	9.35618	9.07334	9.0926	9.57544	9.53058	8.21433	8.59661	9.63704	9.60394	7.7333	8.32194	9.29382	8.99616	8.77216	9.03895	9.04185	9.26903	9.05039	9.09096	8.92906	8.99616	9.37343	8.30541	9.45933	9.12685	9.44512	9.68414
ABHD17B	4.93863	4.809	4.8762	5.12026	4.77354	5.40721	5.07476	4.76355	5.19935	4.91485	5.1207	5.05765	5.11453	5.17242	5.07798	5.11289	5.10318	5.09696	5.0788	4.91057	5.10205	4.68324	4.65835	4.96147	5.11453	4.85387	4.66233	4.70737	4.95881	4.24875	4.94951	4.35922	4.75855	4.80739	4.89153	5.69565	5.55927	4.80209	5.08305	5.54368	4.77048	4.85931	5.21782	5.45706	5.73335	4.92281	5.56629	4.84464	4.62935
ABHD17C	5.20822	3.70753	5.35677	4.77609	4.69044	5.29849	5.02675	5.03047	4.97847	4.76355	4.81955	4.67497	4.67378	4.77609	4.74379	4.77314	4.71106	4.73724	4.87458	4.70922	4.82965	4.74463	4.33048	4.61023	4.73694	3.75282	4.40405	5.8437	5.3946	4.2529	4.27076	5.1744	5.3184	4.08829	5.14802	4.57651	4.14272	5.12563	4.34885	5.02987	5.24549	5.03189	4.75995	4.18839	5.06241	4.78145	4.87416	4.26489	4.53606
ABHD2	6.59155	7.09861	5.56999	6.94501	6.6059	6.40301	6.64001	6.66523	6.75337	6.34837	6.34714	6.49759	6.56043	6.54018	6.66374	6.7199	6.36902	6.68305	6.56192	6.84212	6.52239	6.42367	6.20444	6.53583	6.46065	5.91903	6.02195	6.4539	5.74763	6.14463	7.18482	7.77505	7.37661	6.27804	6.872	7.34463	6.54018	6.93804	7.27807	6.27617	6.13657	6.53019	6.91849	5.9466	6.5395	6.46271	6.31248	6.37245	6.11563
ABHD3	5.42153	6.24218	5.25779	4.88232	4.98738	5.02173	5.10717	4.98958	4.95786	5.46966	5.76297	4.84901	5.25779	5.6371	5.50236	5.13314	5.54251	5.35134	5.98471	4.81877	5.84232	4.1793	4.29376	5.63762	5.52999	3.18315	4.93162	5.41598	6.29157	4.31181	3.53955	4.88725	5.39071	4.63636	5.32686	5.77177	5.24361	6.75618	5.27528	6.16539	5.54088	6.59631	4.84086	5.21088	4.66784	5.85145	5.72656	5.48296	3.92084
ABHD4	5.79682	5.69233	6.08215	5.70833	5.17506	5.82824	5.61133	5.72964	5.78736	5.68064	5.70365	5.74106	5.67094	5.67313	5.80146	5.81738	5.80538	5.69857	5.59968	5.86631	5.5865	5.52169	5.53398	5.72284	5.7159	5.66133	6.20414	5.8035	5.55393	6.28199	6.29671	5.71776	5.36332	5.7762	5.98471	5.90047	5.8285	5.61081	5.93455	5.59814	4.87234	5.79477	5.323	5.16157	5.28043	5.53515	5.57833	5.35367	6.36558
ABHD5	4.66145	4.43712	5.30345	4.93046	4.94088	5.54064	5.00218	4.49175	4.84923	5.05144	5.24683	4.8086	5.02616	4.99792	5.35696	4.84385	5.27928	4.82079	4.95255	4.49119	5.01126	5.03209	5.0989	4.9631	5.02369	4.21448	4.28916	5.05558	4.956	4.23047	4.92477	4.58912	5.58726	4.64051	5.08537	5.47471	4.96901	5.20217	5.18198	4.8382	4.80696	5.7978	4.99221	4.51707	5.06037	5.69287	4.67084	4.25104	4.26394
ABHD6	4.75755	5.24183	4.34243	5.21653	4.56146	5.51665	4.76987	4.643	4.91099	4.8321	5.12478	4.97619	5.03551	5.04922	4.97581	4.87988	4.99585	5.06756	5.02151	5.00487	5.07964	5.0923	5.11718	4.83675	5.04271	3.8351	5.37212	4.71726	4.96901	4.85103	5.0406	4.25665	5.13124	4.93064	5.26445	4.77746	5.17067	4.90858	5.28945	5.48681	4.67238	4.61653	4.44228	5.63243	4.93495	4.92715	5.09805	4.56397	5.25543
ABHD8	5.17067	5.58877	4.73863	4.72175	5.26156	5.50551	5.10166	5.15696	5.10935	4.88645	5.41358	5.432	5.35742	5.14375	5.19351	5.27364	5.10339	5.24999	5.17614	5.33497	5.14741	5.37285	5.34955	5.01369	5.15445	5.32458	5.7255	5.045	5.4708	5.88583	5.37516	4.91893	4.66764	5.02023	5.21739	5.10166	4.90718	4.5796	4.76315	5.06544	5.36487	5.14761	4.9992	5.32205	5.52195	4.95824	5.13274	5.45315	6.03543
ABI1	5.59968	4.35027	5.15402	5.35318	5.43763	5.41336	5.23778	4.58912	5.16712	5.51928	5.2757	5.25692	5.21851	5.37534	5.32794	5.28434	5.34503	5.31793	5.34281	5.01624	5.25069	5.36307	5.25279	5.38896	5.35344	4.13171	4.86795	5.64321	5.82952	4.61007	4.73411	4.96583	5.07386	4.21956	5.42222	5.47927	5.29897	5.98347	5.65986	5.63639	5.59267	4.98272	5.09997	5.49679	5.47497	5.08888	5.30818	5.57805	4.93221
ABI2	6.70456	6.84542	6.2193	6.44697	6.69496	6.40132	6.58389	6.68466	6.62794	6.67084	6.32068	6.52954	6.43591	6.53485	6.53964	6.55922	6.49833	6.41646	6.46487	6.57979	6.41681	6.73117	6.61527	6.6364	6.49576	5.74423	6.18133	6.65726	6.31674	6.27779	6.79762	6.95039	6.93627	6.54223	6.77058	6.56446	6.59224	6.41822	6.7894	6.54739	6.74628	6.39409	6.8462	6.33456	6.82625	6.34329	6.4824	6.21069	6.68851
ABI3	6.32392	6.59224	6.30706	5.48411	5.9207	5.77492	5.85898	6.59191	6.04159	5.84896	6.12131	6.18509	6.06058	5.91994	5.97615	6.10077	6.04078	6.13868	5.92721	6.32909	6.18041	6.115	6.14757	5.93108	6.05899	6.11963	6.49112	5.68294	6.0729	6.76267	6.75773	5.49339	5.72703	6.00326	5.6236	5.84151	5.97395	5.49062	6.45992	5.82144	6.61368	5.77773	5.86357	5.72679	5.44408	5.98704	5.92209	6.22418	7.02033
ABI3BP	5.01348	4.89091	4.25252	5.25213	5.75799	4.965	5.18068	4.96689	4.99965	5.12218	4.78366	4.93585	4.94419	4.96003	5.01957	5.02965	4.85326	5.02861	4.94708	4.85021	4.8358	5.2251	5.01779	5.20782	4.79928	4.58551	4.73516	5.81332	5.27928	4.66739	3.99421	5.95045	5.77133	5.27789	5.11942	4.61256	4.71707	5.75526	4.85306	5.05685	5.09951	5.01434	4.92757	4.90839	5.09013	5.0938	4.96352	5.2076	4.69063
ABL1	6.95265	7.95404	7.16033	8.09101	7.33276	8.23327	7.73127	8.32779	7.76817	7.48133	7.6852	7.79178	7.83075	7.63952	7.78762	7.74846	7.72905	7.79614	7.70359	7.78486	7.66563	7.76229	7.20433	7.23864	7.65173	6.55467	6.86479	8.86028	7.57128	7.60575	7.55498	7.76508	8.00144	6.8736	7.6953	7.87734	8.08856	8.33678	8.13377	7.8986	7.30202	7.61662	7.65107	8.21687	8.28558	7.69121	7.37441	7.60143	8.12226
ABL2	5.33759	5.323	5.09113	6.1639	5.71125	5.101	5.53687	5.33917	5.57527	5.30738	5.44627	5.53806	5.78763	5.40648	5.5295	5.57046	5.57458	5.5119	5.3747	5.57859	5.4391	5.51763	5.45033	5.40808	5.51484	5.35268	5.23586	5.40399	5.18198	5.69022	5.43104	5.67026	6.2222	5.59759	5.31268	6.05662	6.34776	5.56876	5.64375	5.268	4.97537	5.44987	5.99811	5.18953	5.03381	5.21564	5.09484	4.75328	5.72454
ABLIM1	9.16185	9.90651	10.3853	10.7059	9.82305	10.2827	9.94768	8.90475	9.81645	9.99347	9.81086	10.0069	9.86524	10.0205	10.0887	10.2101	10.1058	10.2299	10.0551	10.2827	10.1577	9.99347	9.76098	9.87812	10.0036	10.0168	10.1893	10.2995	9.66379	10.3468	10.4073	10.5712	10.9184	10.6233	10.6817	9.6264	9.75255	9.51054	9.74734	9.38478	9.62387	9.48936	10.0669	9.24453	10.1023	9.758	10.1813	9.59612	10.4805
ABLIM2	4.76452	5.29425	4.9493	4.97046	4.45076	4.58676	4.79292	5.0059	4.63312	4.74904	4.8025	4.97537	4.91217	4.74549	4.79311	4.79863	4.83926	4.74048	4.81877	4.94669	4.74729	4.72395	4.84242	4.77729	4.80502	5.63265	4.44021	4.82273	4.47595	5.24318	4.74463	5.45983	4.78208	5.41671	4.4309	5.14415	4.7982	4.73906	4.84044	4.43469	4.79412	4.61435	4.70943	4.68346	4.35979	4.56204	4.43825	5.06202	4.90939
ABLIM3	8.33463	9.11236	7.93134	8.87983	8.7191	8.84248	8.97731	9.95085	8.81214	8.47245	8.57941	8.76515	8.79017	8.57941	8.59387	8.75154	8.60764	8.60247	8.61116	8.75294	8.47343	8.94055	8.99746	8.72561	8.52803	9.44512	9.40058	8.61737	7.99621	9.05685	8.9344	8.70308	8.57457	9.36241	8.57576	8.76515	8.59661	8.76259	8.53517	8.84109	8.10058	8.33776	8.1691	8.75851	7.85628	8.9692	9.16763	8.91491	9.74734
ABO	4.47682	4.92858	4.39502	4.07122	4.58533	4.5244	4.27724	4.30215	4.25647	4.25559	4.42625	4.53869	4.48274	4.49398	4.43691	4.51238	4.55382	4.52622	4.38639	4.66046	4.47018	4.41495	4.3881	4.53665	4.47543	4.37175	4.17184	3.7869	4.35904	4.72581	3.98586	5.08138	4.10576	3.35845	3.92441	4.28718	4.22819	4.84487	5.07567	4.4715	4.58222	4.26302	4.42895	4.64839	4.21976	4.46006	4.75933	5.05765	4.68081
ABR	6.85209	6.39744	7.1579	6.76389	7.28274	7.08087	7.02443	7.09583	7.13561	6.91615	6.95619	6.90159	6.99502	6.97555	7.00782	7.0273	7.03234	6.96018	7.00694	7.16291	7.04289	7.14113	6.88867	7.00517	6.98273	7.09015	6.91661	5.93839	6.45033	7.11831	7.06739	7.36533	7.06052	7.22811	7.40431	6.579	7.06288	6.72762	6.56339	6.8177	7.02443	6.49939	6.8466	7.54208	6.40809	7.05835	6.95712	7.09162	7.37046
ABRA	5.73542	5.61694	5.36508	5.25145	6.73117	7.83157	6.04497	6.08994	5.78866	6.219	6.19984	5.70208	5.69201	6.22099	5.88677	6.34994	6.64593	6.98887	6.16875	5.70393	6.08871	5.67337	5.20715	5.92545	6.45358	4.24911	5.97252	5.26364	6.09685	5.37493	6.15501	3.6947	5.26364	5.62162	5.39596	5.49925	7.63229	6.18842	7.29896	6.351	6.63786	5.06454	5.85253	7.75039	7.3923	6.25818	6.86205	6.34934	6.31575
ABRACL	6.099	4.92356	7.10728	5.97835	5.85395	5.55299	5.88328	6.12439	5.9678	6.23163	6.20763	6.10554	6.05243	6.10109	5.85926	6.03143	5.97003	6.42293	6.2585	5.43716	6.26486	5.66133	5.66413	6.3514	5.81457	5.45806	5.804	7.65714	6.72023	6.54886	5.49488	5.87055	5.46895	5.30259	5.61304	5.44128	5.61433	6.59878	6.03254	6.08399	6.7399	6.45661	6.01867	5.83562	5.8825	5.72003	5.44199	6.2602	5.50092
ABT1	6.73428	6.66523	6.64481	6.31033	5.99521	6.35959	6.37925	6.37107	6.34994	6.5612	6.47507	6.52552	6.48352	6.46028	6.36729	6.41822	6.4423	6.52622	6.45567	6.56301	6.5126	6.63786	6.56043	6.44697	6.49544	6.24683	6.58533	5.39159	6.2619	6.78664	6.91284	6.06956	6.02345	6.06848	6.65527	6.52727	6.64413	6.24279	6.50011	6.33123	6.27265	6.74814	6.63968	6.6419	6.20848	6.45531	6.63898	6.11682	6.3269
ABTB1	4.82804	5.16406	4.64738	4.38011	4.73035	4.70881	4.68643	4.59586	4.72581	4.64051	4.73035	4.81284	4.73251	4.73072	4.72581	4.736	4.68447	4.67199	4.67927	4.82742	4.73538	4.88311	4.87214	4.7469	4.72333	5.22554	4.87717	4.1854	4.29413	5.08832	4.38709	4.60576	4.18874	4.93288	4.51914	4.80758	4.68429	4.77294	4.87437	4.74362	4.50647	4.49251	4.56362	4.89539	4.41401	5.04726	4.88768	5.40721	4.98901
ABTB2	6.33954	6.13806	5.58802	5.72105	6.14696	5.51832	5.88631	6.11902	6.00102	5.77643	5.86063	6.02816	5.91903	5.83033	5.87545	5.95672	5.89366	5.92691	5.88387	6.23371	5.92264	5.86916	5.89018	6.04721	5.78294	6.21718	5.73773	5.78376	5.44076	6.01443	6.49651	6.90082	6.27427	6.59631	5.89231	5.92775	5.80454	5.44698	5.97505	5.58399	5.6155	5.70365	6.04159	5.57481	5.81119	5.85926	5.55664	5.5605	5.62756
AC000111.3	2.6477	2.43586	2.50047	2.38884	2.12363	2.66305	2.17478	2.2503	2.29802	2.40724	2.08919	2.14688	2.48093	2.35937	2.3398	2.34231	2.4792	2.23031	2.18782	2.36388	2.37205	2.35109	2.35937	2.34473	2.14688	2.49111	2.67058	2.49192	2.61891	2.55136	2.57776	2.52338	2.49192	2.43939	2.40584	2.08919	2.12363	2.5027	2.47677	2.61651	2.33741	2.65305	2.16068	3.08418	2.64558	2.61987	2.46725	2.40443	2.68472
AC002059.10	3.6621	4.14037	3.99176	3.5354	4.02405	3.78799	4.19569	4.11946	4.0975	3.74594	3.87904	3.98122	3.8825	3.78116	3.75909	3.81097	3.82416	3.92142	3.92217	4.04172	3.86464	4.35138	4.40863	3.9566	3.89357	4.26322	4.00009	4.45706	3.68864	3.7037	4.47018	3.94646	4.03797	4.24498	4.33198	4.65113	4.24948	3.67871	3.64295	3.71428	3.88771	3.74673	3.84694	3.89589	3.79213	3.67583	3.99992	3.91279	3.79402
AC002064.5	3.00973	3.37874	3.07598	2.89987	3.21758	3.45691	3.15451	3.31094	3.16744	3.11571	3.13587	3.13365	3.11673	3.0884	3.12391	3.1438	3.19049	2.99542	3.08117	3.12849	3.21517	3.07575	3.55043	3.00973	3.02485	3.79717	3.10684	3.37029	3.25759	2.87375	2.98912	3.23931	2.95876	3.2846	3.24989	3.46947	3.36892	3.39211	3.27028	3.30121	3.24195	2.90075	3.16841	3.5339	2.50516	2.82749	3.41505	3.24333	3.17835
AC003973.4	2.82364	3.15278	2.80957	3.54744	3.0327	2.83332	2.97838	2.82462	2.72037	2.96789	2.95513	3.01271	2.81241	3.07113	2.97361	3.04682	3.04873	2.98371	2.9405	2.96204	2.93728	2.83805	3.37072	2.92717	3.05139	3.65758	3.08271	2.96633	3.36082	3.13711	3.00973	2.76299	3.14775	3.49635	2.93692	2.73713	2.8824	3.05419	3.14112	2.82202	3.43175	2.78974	2.97948	3.00633	2.68424	2.93692	2.86845	2.89114	2.99489
AC003989.4	4.47799	4.37725	4.43432	4.2316	4.19967	4.62637	4.3611	4.06953	4.29884	4.3143	4.50669	4.53279	4.38885	4.28218	4.31223	4.39598	4.40459	4.38655	4.32264	4.62657	4.23785	4.1219	4.3286	4.42167	4.41803	5.10845	3.5867	4.01828	4.48388	3.97787	4.33943	4.14773	3.84263	4.83654	4.47799	4.45788	4.54988	4.59068	4.61359	4.15212	4.43712	4.54966	4.65717	3.86517	3.59395	5.03881	3.90189	4.55419	4.63335
AC004692.5	4.91524	5.54016	4.78463	5.48681	5.19914	5.6975	5.3239	5.52847	5.28064	5.35807	5.27744	5.34302	5.29137	5.33383	5.2952	5.2007	5.42735	5.37424	5.27318	5.27387	5.06562	5.04338	5.28135	5.52868	5.38081	5.17941	5.46794	5.015	5.09929	5.80885	4.70922	4.48294	4.85145	5.83755	5.59617	5.28135	4.77645	5.4997	5.2111	5.50454	5.42467	5.26177	5.27174	5.2205	4.62556	5.42424	4.89334	5.82173	6.11682
AC004941.5	5.61794	5.3828	5.9251	6.55658	6.12993	6.19067	5.85302	6.19418	6.13323	5.98111	6.03143	6.08365	6.02536	5.84126	5.92176	5.92209	5.91712	5.99606	5.92296	5.74343	5.79477	5.63639	5.80098	6.26947	6.01356	4.93952	5.89795	5.03902	6.05995	6.25226	6.37656	6.7415	5.65122	5.90951	5.75721	5.69437	6.01811	6.04919	5.77962	6.14183	6.09366	6.48905	5.69932	5.96193	5.78376	5.58053	5.75388	5.66633	5.59669
AC005162.4	4.13477	4.70201	4.25926	4.17685	4.12211	4.46842	3.97954	4.14404	4.43226	4.4421	4.39924	4.50046	4.48574	4.37416	4.38922	4.49568	4.36664	4.36416	4.42997	4.65309	4.40584	4.17033	4.1119	4.39128	4.45746	5.0502	4.45973	4.3044	3.78799	4.11006	4.46767	5.07014	4.2333	4.2258	4.39829	4.75044	5.11598	4.37944	4.79991	3.6305	4.18522	4.19273	4.37779	4.2502	3.87557	4.35531	4.07777	4.96022	4.23836
AC005224.2	3.81474	3.92947	4.17352	3.69956	3.90363	3.21758	3.70652	4.19293	3.62686	3.48093	3.64152	3.64364	3.61149	3.85123	3.9008	3.92495	3.90006	3.72862	3.91372	4.08621	3.76535	3.66582	3.85123	3.76511	3.49375	2.632	3.84535	3.22635	3.69226	3.83857	4.242	3.64709	4.28007	3.73565	3.70508	3.71129	3.83817	4.1733	3.38165	4.09646	4.08184	3.72574	4.28494	3.45691	4.1514	3.60296	4.83288	3.34105	4.27672
AC005256.1	4.77145	4.82532	4.84324	4.58297	4.65309	4.97257	4.74264	4.84165	4.81651	4.65574	4.73072	5.00608	4.79885	4.70981	4.78542	4.76413	4.81126	4.67886	4.77768	5.13847	4.76987	4.68279	5.00716	4.72498	4.84005	5.49289	4.62205	4.70046	4.47838	4.61998	5.23417	5.85769	4.54251	4.38505	4.50824	4.86815	4.90384	4.43634	4.79149	4.72017	4.87478	4.74026	5.04523	4.60776	4.3499	4.60069	4.46217	5.15086	5.19308
AC005306.3	5.18702	6.24159	5.48748	5.25669	4.79863	4.88907	5.20671	5.01563	4.99713	4.69737	5.24886	5.4911	5.24205	5.42829	5.42015	5.41513	5.49002	5.25279	5.41178	5.57261	5.22554	5.07386	5.17614	5.16792	5.33266	5.95933	5.4138	4.68044	5.03843	5.88746	5.74815	6.01499	4.80923	4.89247	5.22029	4.83064	5.18462	5.17661	5.58676	4.46157	5.43716	5.35521	5.99897	5.30079	5.03902	5.59567	5.31451	4.93162	6.34363
AC005498.3	5.00131	4.95981	5.84769	4.79353	5.52147	4.77645	4.98716	6.16849	5.10493	4.84765	4.97298	5.06869	5.14272	5.07099	5.03339	5.16451	4.84242	4.81914	5.00509	4.88311	4.84667	5.18633	5.15778	5.04398	5.01163	5.72056	5.04201	4.46255	5.15718	5.23868	4.80778	6.11656	4.91443	5.00278	4.39417	4.79558	4.36719	4.5197	4.91524	5.19626	5.51928	5.32205	5.53398	4.86146	5.28972	5.49391	5.40267	5.3331	4.81042
AC005523.2	4.06185	4.40096	4.41686	5.53228	4.38867	5.37923	4.48445	4.40659	4.3587	4.72802	4.37585	4.48652	4.42023	4.40346	4.56475	4.85722	4.4111	4.51316	4.24381	4.77983	4.10504	4.91755	4.59032	5.17941	4.1119	4.25688	4.63212	5.33892	4.64921	4.17224	4.42569	5.42355	5.66729	4.35904	3.8858	4.02003	3.97718	4.32902	4.24782	4.63936	4.23493	4.42329	4.45826	4.42269	5.26068	4.25034	4.6454	4.1489	4.74904
AC005523.3	5.19509	5.22009	5.08329	4.39332	4.31512	4.70516	4.69257	4.72732	4.67946	4.76689	4.87076	5.06454	4.96815	4.71166	4.63676	4.87397	4.75677	4.80836	4.7157	4.94752	4.76315	4.68181	4.70419	4.76194	4.77354	5.29674	4.8762	4.49646	4.95746	5.11556	5.48411	5.12876	4.63557	4.98636	3.99272	4.22704	4.23913	4.70142	4.48669	4.5626	4.61938	4.67397	4.91713	5.36736	4.56086	4.95172	4.45746	5.61002	5.19889
AC005537.2	3.48294	3.02145	3.30876	2.79793	3.40061	2.77916	3.03484	3.11139	3.36666	3.07501	3.24147	3.219	3.23507	3.03849	3.13462	3.10233	3.0884	3.08067	2.97306	3.09764	2.88792	2.77952	2.86845	3.03432	3.3147	3.24683	3.11476	2.5831	2.41498	3.60336	3.36733	2.72367	3.51715	3.13183	3.1247	3.29304	3.76411	3.48134	3.19165	3.11139	3.02987	3.01102	3.20529	3.38093	2.54765	3.16596	2.93553	3.11673	3.32694
AC005592.3	2.97333	2.50826	3.28779	2.7044	3.24832	3.07398	2.96958	2.69226	2.98616	2.96174	2.96468	2.93463	2.86439	2.89697	2.93354	2.89636	3.06387	2.95427	2.92628	3.04414	3.06909	3.15329	3.20207	2.91024	2.79408	2.46725	2.83296	2.97974	3.20366	2.91646	3.47497	3.01523	3.21255	2.96633	3.02909	3.21931	3.24638	3.30698	3.05491	3.00026	3.70855	2.72292	2.58418	2.86192	2.87253	2.64558	3.06205	2.69727	3.00132
AC005606.14	3.22833	3.09321	3.08495	3.28905	4.05791	3.15576	3.31593	3.06677	3.09059	3.27028	3.27315	3.32386	3.34564	3.24241	3.24967	3.2615	3.22227	3.31617	3.32622	3.37715	3.10604	3.63378	3.61612	3.20744	3.26176	3.31403	3.6467	3.6463	3.79933	3.3858	2.76299	3.48462	3.54721	3.36573	2.83332	3.39699	2.79541	3.4741	3.20744	3.03809	3.11455	3.61726	3.18819	3.16862	3.06442	3.41106	3.67918	3.35896	3.34177
AC005785.2	4.54988	4.15515	4.31223	4.07342	4.76133	3.60375	4.27951	4.28684	4.38751	4.08658	4.23346	4.31348	4.25559	4.22595	4.34317	4.2695	4.21627	4.3324	4.34036	4.52476	4.25499	3.94199	3.98284	4.10518	4.28862	4.66377	4.16864	3.67895	3.77003	4.76952	4.79149	4.76254	4.52564	4.98067	4.50046	4.29597	3.60496	4.10466	4.14179	4.13418	3.68051	4.03478	4.52907	3.82342	3.64194	4.14272	4.37761	4.64941	4.62575
AC005838.2	2.8789	3.05996	2.91408	3.31846	3.45602	3.84948	3.35452	3.27369	3.11816	3.01844	3.20481	3.31967	3.27851	3.13559	3.21711	3.19901	3.11523	3.45218	3.25307	3.47209	3.11548	3.41014	3.35172	3.1277	3.35967	3.55659	3.25921	3.18383	2.99087	3.56073	3.40081	3.56006	3.30717	3.70193	3.68072	3.50879	3.71849	3.32597	3.49251	3.41913	2.88267	2.83197	3.38257	2.63893	2.98862	3.04197	3.16162	2.99513	2.90972
AC006026.13	4.38285	4.07034	4.34639	3.61794	3.71388	3.51471	3.74514	3.5274	4.08508	4.06222	4.03155	3.92123	3.93041	3.99157	3.84245	3.95716	3.96007	3.99826	4.116	3.86575	4.02499	3.96785	3.9233	4.09076	3.52976	4.83906	4.90287	4.20554	4.03102	3.67226	3.82086	3.79877	3.28505	3.13318	2.96283	3.75424	4.01506	4.42549	3.7497	4.3753	4.30105	3.73006	3.80676	4.03123	4.15916	4.39997	4.43786	3.4162	4.26605
AC006129.2	2.83928	2.76368	3.2011	2.76229	2.58418	2.99972	2.84564	2.67455	2.67769	2.74437	3.0819	2.67808	2.71813	2.93379	2.95402	2.82811	2.9728	2.8894	2.92658	2.94199	2.76885	3.02855	2.72073	2.82524	2.92899	2.82169	2.72838	3.07889	3.20951	2.75252	2.75407	2.8722	3.01768	2.49033	2.52903	3.18292	2.75252	3.43908	2.78145	2.94225	3.42704	3.00287	3.15771	2.8278	2.65216	2.82811	3.09412	3.70753	2.77803
AC006538.1	3.02748	3.09342	3.37897	3.05753	3.44022	4.01333	3.31536	3.39069	3.48889	3.34586	3.26399	3.41131	3.39021	3.03745	3.22409	3.19668	3.17332	3.23335	3.19119	3.39437	3.23775	3.33667	3.23209	3.24785	3.14974	2.99197	3.90883	3.41798	3.23483	3.5075	3.4859	3.44229	3.02093	2.89286	3.49656	2.77154	3.30945	3.21001	3.48358	3.35845	3.45447	3.17657	3.12419	3.57496	2.79309	3.76031	3.70409	3.70548	3.47386
AC007292.3	4.96067	5.39436	4.5733	4.77941	4.44247	4.35271	4.82574	4.67965	4.78524	4.62036	4.68544	4.74242	4.744	4.74362	4.76952	4.84728	4.75005	4.78349	4.72435	4.8758	4.78642	4.69457	4.75371	4.76472	4.73428	5.01387	5.02753	4.77274	4.2803	4.64921	4.47269	4.50183	4.87416	4.69313	4.63036	4.42895	4.80881	4.79059	5.59314	4.88705	5.26896	5.13542	4.91872	4.18444	4.55621	4.05564	4.82214	4.79331	5.34194
AC007349.5	3.31593	3.03094	2.72073	3.42548	2.83332	3.07297	3.1031	2.86044	2.85234	2.86752	3.05032	2.96117	3.04468	2.86941	2.9531	2.99783	3.06522	3.11765	3.12978	3.1744	3.32622	3.03458	2.79895	2.98862	3.08916	3.38046	3.29348	2.95905	2.79441	2.84182	3.09141	3.43094	2.98862	3.46807	3.0605	3.24733	2.89401	3.16698	2.88156	2.97491	2.81274	3.31617	3.03065	3.09437	2.79964	2.74177	2.63699	3.19099	2.82334
AC007362.3	3.5875	3.98826	3.5779	3.2762	3.56799	3.50526	3.54593	3.56989	3.54677	3.68509	3.54336	3.62105	3.53351	3.6142	3.58283	3.56756	3.63638	3.46573	3.46489	3.53328	3.54017	3.58407	3.55232	3.42348	3.62105	4.0274	3.45559	3.13559	4.04208	3.81022	3.56968	3.94413	3.36782	3.51915	3.25067	3.39635	3.34202	3.41957	3.99216	3.40921	3.72261	3.43532	4.10138	3.85367	3.57961	3.59477	3.43071	3.61171	3.58241
AC007365.3	5.01859	5.62931	5.18111	4.62857	4.41419	5.10385	4.87133	5.55712	4.876	4.75328	4.88768	4.94828	4.94606	4.92757	4.99309	5.06627	4.86683	4.81471	4.89334	4.94564	4.80034	4.82416	4.96839	4.8358	4.94564	5.60568	4.88887	3.94761	4.67658	5.57046	5.12524	5.23734	4.38224	5.46309	5.07014	5.04958	4.44642	5.05	4.91544	5.0976	4.53492	4.89334	4.91504	5.13274	5.29628	5.41223	4.956	5.0936	4.87877
AC007389.3	5.11677	5.25341	4.95541	4.91485	5.23417	5.47596	5.23842	5.2848	5.2291	4.79698	4.87035	5.58502	5.11111	5.13296	5.11787	5.17984	5.18976	5.25779	5.23393	5.79322	5.12456	4.90596	5.08954	5.19087	5.35177	5.34892	5.34215	4.85845	4.26605	5.28922	5.70208	5.01859	4.91604	5.1393	5.47993	5.60955	5.698	4.84923	5.63543	4.85452	5.67524	4.53941	5.14586	4.70162	4.16436	4.64658	4.84364	5.93025	5.44408
AC007401.2	3.45758	3.60518	3.37336	3.16136	2.89376	3.32363	3.32694	3.28974	3.22833	3.29374	3.33995	3.31757	3.31211	3.13365	3.16136	3.19783	3.19391	3.32551	3.37897	3.36621	3.15152	3.31919	2.94109	3.41398	3.13004	3.26449	2.75076	3.18098	2.90101	3.20529	3.95371	3.42528	3.13632	3.68371	3.91242	3.34152	3.56364	3.12747	3.33372	3.2368	3.50899	3.37314	3.15526	3.31423	3.32244	3.15647	3.36194	3.18098	3.76175
AC007680.2	2.86783	3.18848	3.39612	3.16571	3.14255	3.44229	3.20599	3.05491	3.2951	3.22931	3.20064	3.17533	3.19075	2.99809	2.94081	3.01329	3.08733	3.12747	3.18187	3.19265	3.01132	3.28418	3.27552	3.1005	2.97948	2.95952	3.12292	3.3033	3.02063	3.791	3.21182	2.98269	3.23998	3.05112	3.53161	2.99726	2.5919	2.74177	3.03958	3.24989	3.73741	2.96491	3.51823	3.47517	2.93131	3.45758	3.37986	3.2741	3.1719
AC007787.2	4.48164	4.14562	4.36941	4.56897	4.3836	4.93242	4.11118	4.26284	4.17992	4.67776	4.57571	4.59808	4.58797	4.57746	4.57448	4.58003	4.59149	4.5244	4.5324	4.73581	4.47955	4.37489	4.78935	4.47639	4.52638	3.60074	4.51513	4.04549	4.80961	4.8976	3.99715	5.24079	4.37046	4.71608	4.21818	4.33925	4.03232	4.20736	4.37489	4.68101	4.52122	4.69853	4.65758	5.19675	4.52768	4.20294	4.33733	4.88829	4.68917
AC008088.4	3.53246	4.02039	3.14359	3.81189	3.6947	3.56923	3.73463	3.42001	3.68846	3.56114	3.51601	3.7917	3.65779	3.43197	3.53804	3.58937	3.69007	3.42502	3.57747	3.64709	3.61211	3.67365	3.7869	3.62028	3.56508	3.68371	3.76556	4.06222	3.04092	4.12532	3.63547	4.36149	4.09844	3.3222	3.63314	3.93448	3.497	3.81078	3.64833	3.49166	3.54636	3.61255	3.52673	3.26131	3.49105	3.68389	3.50018	3.75771	3.8249
AC008746.12	3.95127	3.70855	3.20599	3.30849	3.47209	3.68788	3.5431	3.63468	3.33809	3.68526	3.40394	3.54658	3.35987	3.36782	3.23008	3.3351	3.36866	3.46006	3.47187	3.58048	3.40964	3.78315	3.78779	3.43115	3.51782	3.66841	3.37943	3.8044	3.71214	3.66598	3.17213	3.90169	3.68509	4.00156	3.87232	3.36082	3.50018	2.95457	3.54182	3.5017	4.12397	3.30121	3.28553	3.55555	3.65659	3.5525	3.38117	3.28324	3.34039
AC008753.4	4.97664	5.42735	5.0907	4.5796	4.74962	4.60615	4.98939	5.09909	4.93022	4.94403	4.62189	4.86856	4.60695	4.65349	4.69771	4.79619	4.76808	4.49646	4.4365	4.87021	4.75815	5.18862	4.86437	4.70142	4.87988	5.11169	4.15978	4.68522	4.71465	4.90249	4.94111	5.36376	4.36923	4.66434	4.48313	4.51204	4.81877	4.74962	5.02131	4.5377	4.75026	5.00343	4.86683	4.81979	4.63194	5.03402	4.26034	5.30345	5.11979
AC009120.6	5.18068	4.51187	4.97439	5.89256	5.04726	4.82556	5.22753	5.19217	5.14035	5.15001	5.0152	5.04922	5.06627	5.06562	5.02923	4.87498	4.87657	4.92456	5.08354	5.0551	5.09159	4.88887	4.90761	5.10451	5.0551	4.37917	5.20217	4.78799	5.11111	4.94545	5.34038	5.00859	4.77215	5.09398	5.49604	5.00755	5.153	5.03068	4.38583	4.94028	6.22188	5.14721	5.73384	4.37434	5.27528	5.29339	5.56607	4.24821	4.89031
AC009133.15	4.44172	4.38728	5.13001	4.18327	4.10596	4.9382	4.6486	4.5792	4.65132	4.02169	4.52081	4.4096	4.52807	4.6694	4.59483	4.5798	4.63355	4.5828	4.54409	4.59367	4.38304	4.46217	4.63414	3.83999	4.45901	5.63663	4.64265	4.31693	4.23478	5.22731	4.57592	4.44267	4.07923	4.8374	3.89867	4.50824	3.67871	4.29991	4.3836	4.73332	4.26155	4.4313	4.30671	4.57901	4.51802	4.61499	4.21483	4.79738	5.08158
AC009502.4	4.02057	4.09439	4.76554	4.40523	4.22412	4.42189	4.6468	4.56342	4.68468	4.05454	4.24343	4.25943	4.26809	4.26843	4.25358	4.3284	4.29615	4.28437	4.29541	4.45502	4.4736	3.89476	4.23948	4.37194	4.30065	3.85123	3.82588	3.83774	3.62908	5.36759	4.39847	4.17968	3.88679	4.2778	4.73804	4.02874	4.5317	4.36991	4.744	4.49269	4.42189	4.19967	4.58778	3.99404	4.33198	4.10557	4.20388	4.83599	4.29376
AC010145.4	3.91649	4.86349	4.43226	3.76175	4.29975	4.62418	4.60978	4.56721	4.67238	4.23478	4.2037	4.37935	4.30065	4.28737	4.44602	4.55857	4.47817	4.25088	4.28106	4.64423	4.26735	3.8115	3.88658	4.17874	4.38547	4.75229	4.28007	3.87269	4.48294	5.13274	5.05765	4.73988	4.24839	4.77215	4.94588	4.42569	4.44541	3.44022	4.69987	3.84225	3.74165	4.24421	4.49417	3.52319	4.39977	3.90325	4.07976	4.72722	4.20995
AC010524.4	5.12546	5.42424	4.52969	4.60538	5.27614	4.61895	5.12644	5.24404	5.15759	4.68763	4.67696	4.94849	4.92921	4.44076	4.76315	4.88542	4.73784	4.76791	4.88768	5.18418	4.75269	4.52272	4.5917	4.91462	4.86856	5.09484	4.95299	4.1935	4.19026	5.41806	5.35458	5.45223	5.40721	5.89631	4.73476	5.02835	5.32134	4.71306	4.98862	4.38452	5.04708	4.68643	5.00175	3.92632	4.48816	4.58452	4.68882	5.26391	5.77133
AC012065.7	6.76839	5.99316	6.14787	6.13709	5.11231	5.58426	5.5451	5.00798	6.21718	6.30738	5.72679	6.02511	6.36216	5.78321	7.05879	5.96803	6.49576	5.68115	6.45428	6.40843	6.01764	6.54993	6.01265	6.36558	6.43011	5.52218	5.23691	7.78968	6.34776	6.33851	7.20229	6.22781	5.68314	5.77302	6.90365	5.83344	5.01287	6.90851	7.47658	5.86166	5.79289	6.27235	6.22162	6.02536	5.82085	6.19865	5.12174	5.54206	4.31752
AC012360.6	4.52948	4.49718	4.79039	4.16697	4.19694	3.9799	4.24518	4.24273	4.32126	4.20813	4.32142	4.30197	4.39398	4.44883	4.43765	4.50242	4.44715	4.27022	4.3149	4.29469	4.19984	4.11765	4.27092	4.39977	4.32244	4.2505	4.38422	4.67017	4.28295	4.68522	4.41477	5.05338	4.82987	4.63875	3.98158	4.90287	3.74475	4.11327	4.33276	4.45056	4.52622	3.88876	4.704	4.03155	4.47838	3.65641	4.08923	4.77645	3.65923
AC012499.1	3.34809	2.88325	3.01023	3.64275	3.31493	3.4487	3.25257	3.00817	3.27596	3.22257	3.28073	3.40511	3.40285	3.06936	3.08319	2.98641	3.07042	3.1709	3.14527	3.22055	3.29831	3.40104	3.22635	3.12292	3.21711	3.50376	3.61189	3.86649	3.20928	3.53471	3.50215	3.40348	3.38188	3.99681	3.51626	3.42587	3.5145	2.98215	2.86629	3.11792	3.46828	3.41889	3.09141	3.26978	3.20928	2.79793	3.5105	3.00258	2.76948
AC012531.25	3.94413	4.6468	4.23767	3.61706	3.92158	4.16845	3.93904	3.86919	4.03951	4.03437	3.89167	3.88541	3.88231	3.81311	3.94685	4.12934	3.99013	3.91587	3.86003	4.19462	3.80695	4.23009	4.2758	3.92233	4.10483	4.2037	4.12549	3.87456	3.61028	3.98382	4.51097	4.13005	4.13625	4.648	3.677	3.87056	4.70943	3.81883	3.55106	4.15857	3.44331	3.9564	4.04056	3.89664	4.70672	4.11637	4.06316	4.04244	3.67871
AC013463.2	3.6401	3.14974	3.79561	3.919	3.19668	4.0655	3.43791	3.53201	3.48529	3.66598	3.60883	3.63089	3.66992	3.75751	3.6865	3.83933	3.83042	3.79638	3.73891	3.70837	3.50879	3.12246	3.22706	3.56485	3.69452	4.38111	3.45833	3.48184	4.04002	3.33784	2.846	4.18105	3.68829	4.4311	3.29117	3.72072	3.86575	3.07803	3.90102	3.93139	3.28505	3.56715	4.28144	3.40787	3.48508	3.68526	3.18407	3.33886	3.75095
AC013733.4	2.8186	2.8821	2.95059	2.61987	2.96764	2.95743	2.75076	2.73166	2.8365	2.8641	2.7665	2.80343	2.80183	2.77763	2.83623	2.8356	2.79964	2.81394	2.88183	2.87315	2.7702	2.84533	3.00082	2.85922	2.79237	3.14277	2.81304	2.6902	2.84788	2.67612	3.42874	2.62232	3.12822	2.90505	2.84085	2.81587	2.78905	3.07113	3.21255	2.83226	2.72915	2.83771	2.87253	2.65827	3.05539	2.68929	2.91115	2.85111	2.83432
AC016831.7	3.93193	3.59865	3.70951	3.19367	3.21736	3.27712	3.34467	3.50108	3.62886	3.1744	3.36335	3.42791	3.29919	3.58156	3.56176	3.59088	3.61028	3.37986	3.35638	3.62987	3.47627	3.19925	3.0997	3.49677	3.43639	3.54978	4.38655	3.83104	3.70469	3.44805	3.34058	3.53955	2.96603	3.6873	3.25282	4.27487	3.11739	2.8249	3.77935	3.38257	3.5132	3.6066	3.544	3.28779	3.69548	3.41578	2.78846	2.96658	4.04622
AC016999.2	4.4354	4.60754	4.88232	4.34282	3.96082	3.98714	4.21121	4.60453	4.57069	4.6409	4.31223	4.46392	4.42068	4.06972	4.20904	4.1717	4.22723	4.2906	4.28459	4.50435	4.15515	4.29413	4.28643	4.37725	4.30494	4.09264	4.51877	4.1755	4.29225	5.11962	4.60855	4.36273	4.26302	4.10391	4.32684	4.35118	4.13382	4.37661	5.09317	4.14961	4.36594	4.13641	4.36093	3.83299	4.1557	4.49398	4.2803	4.39522	5.27724
AC017002.2	4.9491	4.69002	4.27816	4.51275	4.44806	4.23767	4.48313	5.02965	4.52789	4.00796	4.66571	4.67603	4.66784	4.49929	4.46117	4.50669	4.58241	4.26228	4.17766	4.43053	4.38322	4.48744	4.70613	4.55152	4.21573	5.06074	4.60557	4.70297	4.57937	5.03551	4.4354	5.08329	5.01801	5.08075	4.81417	4.73156	5.12625	3.20672	4.59483	5.17327	3.61687	4.78859	4.29899	4.80794	4.75655	4.13171	4.02262	4.68643	4.71801
AC017104.6	5.71979	5.99548	6.20351	5.57913	5.91513	5.92264	5.99959	6.11276	5.96047	5.98506	5.7801	6.01527	5.81602	5.72255	5.77084	5.91596	5.88774	5.72525	5.78165	5.95584	5.86775	5.76533	5.79585	5.99927	5.98854	6.14787	5.94216	5.49679	5.43036	7.00609	6.06426	6.15897	6.03088	6.62061	5.87343	6.11471	5.77133	5.64216	5.67	5.352	5.66335	5.51388	6.06539	5.62878	5.36508	6.0738	5.39973	6.46446	5.81516
AC018755.16	5.35024	5.22442	5.79634	4.7827	5.26225	5.46676	5.4113	4.98738	5.42515	5.03424	5.41156	5.52551	5.42467	5.2848	5.3017	5.30385	5.43104	5.47927	5.40834	5.56974	5.2734	5.39762	5.57282	4.98227	5.29741	6.23307	5.69857	4.8321	5.28972	5.78037	5.67941	5.98935	4.81955	5.67732	5.33674	5.08178	4.58081	5.20259	5.19935	5.24999	4.8962	4.91918	5.03946	6.08815	4.96108	5.36662	5.10147	5.67286	5.38107
AC018755.17	2.50901	2.93969	2.89141	2.78543	2.84756	2.77662	2.71224	2.82136	2.62373	2.58834	2.79514	2.68598	2.78451	2.82685	2.90075	2.79514	2.76087	2.79041	2.6966	2.83805	2.87034	2.926	2.81115	2.63745	2.65175	3.20412	2.50047	2.77561	3.04069	2.86661	2.8243	3.43443	2.62751	2.80618	2.55509	2.89225	2.7211	2.87826	2.62598	2.8569	2.75448	2.60716	2.79077	2.98133	2.79441	2.62967	2.90595	2.53511	3.20393
AC018766.6	4.29355	4.1717	4.02682	3.7882	4.27376	3.88194	4.08301	4.4468	3.91669	4.00338	3.97368	3.92475	3.96937	4.04094	3.85178	4.07431	3.98512	3.99029	3.94818	4.12284	4.06894	4.01259	3.9877	3.95446	4.04659	4.58081	4.10157	3.57496	4.02152	3.85046	4.25123	3.9171	3.2837	3.92385	3.58958	4.3574	4.34622	3.6921	4.24238	4.26529	3.80711	3.95955	4.08103	3.7043	4.21307	4.744	4.28718	3.84384	4.6661
AC018816.3	5.03209	4.72132	4.97827	4.70717	6.41115	4.75185	5.31998	5.06344	5.06935	5.56629	4.87234	4.93655	5.21068	5.00301	4.92817	5.00131	4.9715	5.04271	5.24361	5.1829	4.9214	4.99792	5.27659	5.29586	4.94251	5.64191	5.17707	4.64011	5.32089	5.36216	5.48508	5.55785	6.20823	5.39159	5.26597	4.63504	5.27767	5.37694	5.45983	4.71939	5.51344	5.21759	5.7419	4.33593	5.13907	4.54544	4.46063	4.49665	4.5483
AC024560.2	4.88705	3.80223	4.08449	4.70279	4.06835	5.32109	4.50303	4.57592	4.65696	4.31922	4.66764	4.68181	4.70383	4.34715	4.3996	4.27237	4.44155	4.33181	4.53492	4.47225	4.36132	4.53436	4.52527	4.59544	4.55565	4.51783	5.4995	4.36328	4.35885	5.79427	4.4635	4.5816	3.9911	5.67313	4.25237	4.975	4.73351	4.2722	4.50589	4.70694	3.86977	4.63539	4.80355	4.56303	4.27539	4.21956	4.4311	4.60285	4.56029
AC025442.3	4.21798	4.59524	4.77881	3.7222	4.44291	4.29765	4.37084	4.33379	4.43595	4.1759	4.40035	4.58297	4.47799	4.26678	4.27908	4.40943	4.38304	4.466	4.39654	4.64359	4.36664	4.18028	4.0781	4.36852	4.40752	5.44367	4.31163	4.29187	4.10518	4.8458	4.96228	4.43487	3.94891	4.51986	4.35415	4.2041	3.9855	4.1299	4.43449	4.11692	4.13717	3.85965	4.68324	3.96616	4.06856	4.41495	4.52371	4.82122	4.76513
AC064852.4	3.13104	3.11647	2.71535	2.60136	2.86253	2.5106	2.73126	2.61559	2.76853	2.71965	2.81494	2.83771	2.81274	2.67094	2.65305	2.74329	2.87621	2.99172	2.99017	3.03197	3.07917	2.43039	2.78045	2.96174	2.53386	2.57568	2.95338	3.22541	2.53447	2.80183	2.98075	3.24218	2.73314	2.43039	2.82237	2.94888	2.36629	3.02246	3.36082	2.62511	2.91559	2.67728	2.37205	2.87284	2.89343	2.90566	3.37578	2.9593	2.96516
AC067956.1	2.74177	2.87767	3.12694	2.80989	2.79831	2.76981	2.73605	2.70665	2.86528	2.89666	2.72144	2.85542	2.75524	2.78974	2.93846	2.92797	2.70554	2.83398	2.71652	2.90566	2.87375	3.00842	3.05569	2.86845	2.77838	2.86012	2.88671	3.28014	2.75665	2.96174	2.73277	2.74542	2.81524	2.78045	2.61056	3.09537	3.51935	2.74472	2.89343	2.49824	3.16058	2.86845	3.08549	2.54198	2.95978	3.15513	2.83398	2.63251	3.00947
AC068039.4	4.03639	5.27058	3.4765	4.07463	4.38322	3.85406	4.29149	4.54308	4.73784	3.9635	4.24684	4.21664	4.22668	4.27891	4.25342	4.13537	4.06334	3.96861	4.08141	3.95127	4.06147	3.97589	3.90813	3.82867	4.06753	3.71368	4.63793	4.68241	4.10012	4.76671	3.93329	4.48388	5.06916	5.54633	4.66313	3.71271	3.37006	4.70758	4.25616	3.97533	4.6456	4.83006	4.27969	3.89682	3.7534	4.47487	4.35394	3.48031	3.96138
AC068138.1	4.00026	4.13698	3.97314	3.42813	3.94374	3.96025	3.67851	3.67895	3.74811	3.47477	4.03659	4.43469	4.07107	3.9171	3.99133	3.96214	3.97572	3.96331	4.04414	4.20482	3.94627	3.27851	3.72667	3.77478	3.74102	5.25234	3.3683	3.8856	3.72418	4.35118	4.1527	3.60787	4.37122	5.00025	4.29044	3.81354	4.16495	3.55871	3.98399	3.07648	4.21674	3.44204	3.63113	3.43975	3.7057	3.77581	3.589	3.8249	4.58797
AC068831.3	4.27092	4.34827	4.39997	3.83451	4.3387	4.30596	3.91607	4.34639	4.24537	4.2598	4.04493	4.08162	4.09498	4.05917	4.0942	4.21029	4.21324	4.04208	3.89357	4.26194	4.10214	4.39616	4.54524	4.27505	4.09111	4.24875	3.90325	3.75539	3.99753	4.30387	4.16902	4.35852	4.05016	4.16961	3.22129	4.19175	3.79951	4.27059	4.50183	4.46732	3.76014	4.43015	4.57088	4.40787	4.37801	4.63716	4.3499	4.22972	4.39215
AC073283.7	4.5798	4.74114	4.30976	4.64401	3.99992	4.13285	4.41401	4.55079	4.54685	4.50963	4.4641	4.56457	4.34282	4.3501	4.39253	4.37549	4.45601	4.23636	4.26735	4.53888	4.39735	4.46429	4.60349	4.3996	4.31031	4.95561	4.4163	4.07013	4.31468	4.7467	4.39695	4.14118	4.23231	4.4354	4.35514	4.30065	4.0122	4.75026	4.53729	4.14161	4.73391	4.8048	4.75163	3.71627	4.52654	4.48274	4.42233	3.93541	5.10781
AC073321.4	3.37943	3.31735	3.55405	4.00393	3.42456	3.87192	3.53308	3.56485	3.57014	3.376	3.70409	3.86977	3.69999	3.47584	3.51536	3.40147	3.48226	3.6058	3.46876	3.59569	3.32597	3.68449	3.81668	3.46767	3.44375	3.36406	4.09518	4.3367	3.53328	3.47676	4.26696	3.07321	3.85441	3.37804	3.90572	3.43595	3.6463	3.73463	3.47363	3.41528	3.865	3.51298	3.33555	2.95195	3.35731	3.6305	3.62866	3.51867	3.4741
AC074212.6	4.8086	5.36108	5.31819	4.48798	4.92338	4.77256	5.14166	5.09295	5.07054	4.66412	4.94088	5.01695	4.96481	4.85887	4.88868	4.98882	5.00322	4.89809	4.86027	5.08832	4.8976	4.87915	4.88987	4.94871	4.92779	5.57883	4.64149	4.59407	4.94986	5.05338	5.01573	5.67865	4.6009	5.42377	4.38564	4.6661	4.77803	4.65798	4.95901	4.55003	4.59149	4.65497	5.36508	5.137	4.65132	5.17614	4.82532	5.57738	5.00443
AC079305.10	4.29975	3.6568	3.92712	4.2414	3.66043	3.6461	3.90939	3.40671	3.93271	4.02039	4.13115	3.99697	4.12683	3.59884	3.71232	3.6413	3.84769	3.86762	3.68246	3.79776	3.69309	3.9491	4.07342	3.94932	3.63314	3.23055	3.93524	2.98989	3.93309	3.6921	3.77996	4.10103	4.19733	3.60392	3.65309	4.42045	4.56397	3.34058	3.43858	4.13891	4.15476	4.1514	3.6469	4.03659	3.74514	4.05377	4.25518	3.73107	3.84655
AC079741.2	2.38577	2.65963	2.73969	2.86439	2.61328	3.01329	2.71351	2.6902	2.80585	2.91677	2.62558	2.53447	2.52059	2.68889	2.6058	2.53625	2.59043	2.53386	2.58418	2.52838	2.62511	2.46326	2.81363	2.81394	2.72037	2.76546	2.72875	2.79514	2.7967	2.85627	2.66514	2.693	2.632	3.18407	2.58252	2.90538	3.10391	2.8981	2.86813	2.85365	2.57241	2.5751	2.67846	2.70626	2.31821	2.40724	2.74069	2.6919	2.62839
AC079767.4	3.47497	3.33123	3.49166	3.18669	2.98189	2.98189	3.02909	3.0884	3.10546	3.13813	4.20608	3.21422	3.21182	3.03694	3.07526	3.05491	3.05647	3.14626	3.15101	3.09363	3.33485	3.64275	3.53265	3.25588	3.12317	3.35284	3.18292	2.73568	2.76817	3.10022	3.36847	2.99754	3.16188	3.56485	3.1119	2.71224	3.55445	3.37897	2.9609	3.56654	3.72782	3.87435	3.17765	2.81115	3.37094	3.19806	3.04092	4.24343	3.71309
AC079807.4	3.23209	2.64726	2.75665	3.46947	3.3769	3.20014	2.98566	3.48379	3.28624	2.70994	3.02776	3.12694	3.04951	2.95978	2.85573	2.97898	2.94664	3.06909	3.0884	3.17509	3.35545	3.1026	3.35409	2.97065	3.18483	3.50985	3.16718	3.41552	3.32409	3.19099	3.27875	3.42768	3.39906	3.33278	3.08941	2.94109	2.95002	2.7938	2.88735	2.41798	2.65175	3.45535	3.27966	2.74003	3.35845	3.29464	3.25355	3.08243	3.2846
AC083843.1	5.42901	5.73363	5.07171	4.44771	5.47029	4.3877	5.38353	4.99104	5.22864	5.26875	5.12852	4.80696	5.12435	5.1408	4.98294	5.13211	4.82532	4.69893	5.04104	4.82416	5.12393	4.71862	4.75123	5.1827	5.07779	4.05037	4.73211	4.50145	4.73232	4.10355	4.32628	4.25252	5.10598	5.21629	5.08054	5.20704	6.07895	5.07714	5.50141	4.93841	5.7125	5.63639	6.14007	4.69023	5.59495	5.07779	5.86113	4.83026	4.50712
AC083949.1	3.49272	4.12456	4.33308	4.5058	3.96672	3.82416	4.0301	4.42364	3.8247	3.98048	4.07689	4.05436	4.06932	4.17571	4.18874	4.2414	4.19984	4.03913	4.01771	4.13912	3.88081	4.06165	4.20218	4.00813	3.68267	2.96334	3.92026	5.00716	4.72038	4.18422	4.2943	4.67886	4.55061	4.94403	3.7043	3.93193	4.12514	3.77198	3.95335	4.04822	4.31676	4.22841	4.06718	4.35549	4.02817	4.27651	4.07481	3.86762	4.09993
AC084219.3	3.73761	3.65659	3.69249	3.0135	3.21931	3.78198	3.54101	3.69734	3.61512	3.28437	3.38349	3.40371	3.3358	3.36711	3.34152	3.41798	3.37943	3.42768	3.31875	3.55065	3.45582	3.47763	3.3463	3.41083	3.45787	3.90046	3.54421	3.11739	3.68547	3.77666	4.00779	3.58426	3.3601	3.21155	3.46552	3.23635	3.68132	3.00526	3.80573	3.84283	3.22658	3.41376	3.36552	3.36573	3.24147	3.14695	3.6066	3.87056	3.88679
AC087501.1	2.95195	2.79764	3.33168	2.5993	2.76401	2.70626	2.77367	3.01299	2.50753	2.92063	2.81422	2.82202	2.9028	2.8521	2.91498	2.96283	2.92797	2.86497	2.82906	2.8521	2.74638	3.07068	3.09816	2.55509	2.79964	3.04713	2.87621	2.60035	3.0452	3.14277	2.82007	3.25967	2.67612	2.82841	2.51984	2.62695	2.75362	2.9723	2.85143	2.7882	2.8789	3.26424	2.73495	3.07726	2.61606	2.7353	3.00155	3.50663	3.08043
AC090627.1	2.72183	2.60768	2.582	3.12598	3.10709	2.87954	2.6757	3.88136	2.69425	2.48093	2.72292	2.67769	2.70402	2.75294	2.74437	2.7619	2.87588	2.6877	2.71612	2.71267	2.63014	2.60389	2.67227	2.55322	2.74069	3.12391	3.05916	3.27875	2.50047	2.44161	2.44805	3.29664	2.88505	3.25189	2.99668	2.77596	2.79441	2.69226	2.53752	2.91733	2.84182	3.6401	2.99437	2.49033	2.85922	3.24122	2.60861	2.44693	2.49366
AC091133.1	5.52598	5.98834	5.82354	5.43505	5.28878	5.19698	5.44717	5.65778	5.40422	5.44793	5.42691	5.62281	5.49628	5.4977	5.63543	5.54854	5.44103	5.43934	5.49289	5.58802	5.4587	5.79705	5.84126	5.59219	5.47234	6.46304	6.06818	5.6809	6.1431	5.5067	5.78191	5.03592	5.39388	5.26619	5.37648	5.50573	5.7978	5.5635	5.36825	5.4415	5.56401	5.14461	4.67906	5.56162	5.22379	5.57237	5.53639	5.31181	5.70599
AC091633.3	2.77982	2.49537	2.32126	2.58526	2.55763	2.81557	2.56212	2.38736	2.48642	2.54012	2.52059	2.52395	2.54138	2.50826	2.52588	2.46431	2.44046	2.42329	2.56439	2.437	2.53818	2.70586	2.64204	2.4997	2.60442	2.76368	2.40584	2.47164	2.83364	2.76948	2.87002	2.65216	2.73713	2.60442	2.24472	2.47754	2.48731	2.693	2.23031	2.84343	2.77269	2.70586	2.52123	2.77057	2.38092	2.5271	2.61606	2.59512	2.80034
AC092192.1	2.85982	2.54261	2.53511	2.54517	2.93608	3.23856	2.67012	2.64327	2.89225	2.9773	2.7486	2.73427	2.70959	2.88267	2.82627	2.79237	2.75138	2.65139	2.68929	2.63933	2.63112	2.58741	2.58682	2.71535	2.86075	2.95978	2.90161	3.00898	2.58682	2.32416	3.08964	2.72949	2.52838	3.20529	2.98835	2.80248	2.72985	2.81115	2.88096	3.2769	2.68929	2.64248	2.39684	2.55203	2.46217	2.79997	2.8801	3.23236	2.73713
AC092620.2	4.41954	4.49874	3.94818	3.59926	4.02702	3.41936	4.01333	5.40445	3.41465	4.27635	4.17033	3.95071	3.89167	3.96488	3.87803	3.83471	3.79273	3.65241	3.88488	3.56403	3.95937	4.50473	4.53729	3.84225	4.01809	4.40228	4.63414	4.45645	4.48611	3.56424	4.03398	3.74439	5.00487	4.93863	4.14056	3.29395	3.39946	4.33048	3.72782	4.07976	4.79453	4.25633	3.91508	3.91071	3.80886	3.84263	3.84675	3.70387	3.89167
AC092660.1	4.24574	4.57188	3.66927	3.89114	3.80711	3.65718	3.98284	3.74914	3.7524	3.71129	3.95049	4.02312	3.94742	3.94891	3.91071	3.90189	3.84655	3.88271	3.87417	3.90957	3.90325	3.8009	3.87214	4.30558	3.94338	4.08467	4.29208	3.65095	3.83817	4.07269	4.0668	3.54658	4.33451	4.87895	4.75206	3.99051	4.13151	3.45602	3.60074	4.18422	4.31658	4.03896	3.91918	3.20695	3.93615	3.46767	3.44483	3.89646	3.87513
AC092667.2	3.61575	2.60344	2.93553	3.71525	3.42528	3.67504	3.36106	3.26256	3.27431	3.11739	3.19626	3.20159	3.22736	3.16188	3.07193	3.04038	3.07247	3.40147	3.46787	3.30193	3.53826	3.38628	3.52105	3.23483	3.1988	3.50353	3.66447	3.42348	3.72094	3.09342	3.11242	2.78013	3.44824	3.23906	3.86555	3.22331	3.27268	3.05112	3.02909	3.11939	3.37986	3.49724	3.74102	3.43115	3.84579	2.78543	3.93958	2.81919	2.92744
AC100830.4	3.76253	3.52127	4.17685	3.65659	3.77077	3.6873	3.90147	3.8355	3.8843	3.98493	3.66487	3.6881	3.58008	3.61134	3.74692	3.68172	3.74535	3.67642	3.48547	3.58958	3.79638	3.90325	3.78744	3.79836	3.72451	3.02643	3.1872	3.89627	3.32174	3.25875	3.64218	3.59158	4.2853	3.95483	3.20136	3.9911	4.05492	3.39811	3.66759	4.40716	3.55736	4.09439	4.06222	3.94968	3.64451	3.77622	4.13437	3.84225	4.23636
AC104667.3	4.70859	5.0152	5.67893	4.66682	5.23021	5.16712	4.97066	5.15069	4.98349	4.87778	5.21152	5.28454	5.22932	5.11475	5.15486	5.268	5.26391	5.21961	5.16007	5.40859	4.96815	4.81471	4.86915	4.68685	5.21714	5.10781	5.05597	4.70613	4.41862	5.95933	5.62462	4.78045	4.78567	6.26575	5.0667	4.97478	4.93416	4.64446	5.02693	5.04143	4.73804	4.64265	5.17683	4.99965	4.76072	4.83633	5.48411	5.45128	6.1639
AC106801.1	4.06355	5.19806	4.5038	3.90125	4.82079	4.66357	4.70162	4.705	4.64149	4.56185	4.42212	4.82454	4.61378	4.31108	4.50712	4.58714	4.54211	4.35436	4.46196	4.77729	4.68201	4.1489	4.23084	4.47269	4.58261	4.53888	4.8044	4.14037	3.55592	5.2214	5.19176	4.66108	4.91933	5.3286	4.77354	4.86566	4.71389	4.37549	4.2943	4.18707	4.56282	3.69393	4.32493	4.2722	4.13717	3.92495	4.05243	4.89983	5.17264
AC108056.1	2.7382	2.99695	2.82334	2.45327	3.12268	2.89343	2.91408	3.19141	3.11647	2.84372	2.61012	2.69767	2.62135	2.80034	2.86137	2.90538	2.846	2.78045	2.76478	2.81182	2.41391	3.03958	2.97679	2.73713	2.84242	2.67455	2.6966	3.16332	2.89376	2.70508	3.15152	3.00842	2.8943	3.14673	2.67381	2.75915	2.68557	2.43254	2.78013	2.81889	2.87588	3.07016	3.24638	2.55263	2.9773	2.9566	2.98434	2.80034	3.26206
AC112198.1	3.58069	3.86428	3.68864	3.5779	3.22107	2.92095	3.45091	3.85766	3.47339	3.17011	3.47101	3.55384	3.60018	3.34271	3.36983	3.39527	3.39699	3.30849	3.25807	3.42246	3.26692	3.44375	3.46146	3.65415	3.5176	3.24515	3.07598	3.05569	2.77462	3.27806	3.58583	3.66968	3.4162	3.82588	3.25404	3.77935	3.35243	3.11283	3.88794	3.36406	4.11895	3.44645	3.4895	3.47895	3.19463	3.94856	3.82322	3.30717	3.45195
AC114730.11	3.27172	3.41578	3.27919	3.66949	3.24854	3.18794	3.44069	3.63825	3.43532	3.32757	3.1679	3.09342	3.17311	3.19321	3.2368	3.32779	3.231	3.3358	3.3502	3.42134	3.19192	3.52851	3.43154	3.27899	2.88384	3.68449	3.2769	3.71644	3.66363	3.56777	3.23953	3.43858	3.35751	4.3753	3.58857	3.04682	3.30354	3.309	3.23931	3.35149	3.1679	3.13391	3.42855	3.3024	3.26472	3.15956	3.40765	3.21469	3.20718
AC114752.3	3.56735	3.26548	3.27222	3.52592	3.48184	3.31094	3.43071	3.34854	3.38934	3.81097	3.20718	3.24447	3.17909	3.34226	3.42791	3.39926	3.31919	3.16817	3.16136	3.31757	3.29529	3.50985	3.70256	3.56322	3.19488	3.55405	3.58241	3.58562	3.13632	3.28073	3.96753	3.35545	3.42528	3.96138	3.32409	3.51646	3.49481	3.2447	3.50062	3.54017	3.61379	3.35869	3.77116	3.19969	3.15405	3.32622	3.2893	3.39256	3.4456
AC124997.1	2.46615	2.47509	2.77952	2.41798	2.88096	2.44488	2.43039	2.2865	2.56615	2.39215	2.51473	2.36388	2.58834	2.46217	2.39514	2.51263	2.47242	2.45022	2.49033	2.55203	2.08919	2.86107	2.80831	2.72001	2.61701	2.52201	2.71684	2.73126	2.42197	2.56561	2.51559	2.60083	2.34231	2.61651	2.87034	2.57023	2.24472	2.47075	2.68889	3.29896	2.44693	2.52967	2.61987	2.45227	2.69058	2.74638	2.67419	2.85659	2.56389
AC136289.1	2.50122	2.69888	2.9593	2.60247	2.32683	2.47754	2.43939	2.87796	2.46995	2.57624	2.52201	2.53693	2.50424	2.48165	2.43039	2.52588	2.48421	2.46326	2.4612	2.38884	2.48642	2.61162	2.49192	2.63839	2.65036	2.9881	2.78072	2.80277	2.64726	2.49192	2.48165	2.37913	2.36629	2.48817	2.4513	2.67496	2.25546	2.30145	2.55818	2.50047	2.89513	2.87621	2.65175	2.36176	2.98371	2.85176	2.90395	2.654	2.75327
AC139100.3	3.24355	3.12142	3.55555	3.06828	2.92571	3.15647	3.34152	3.01074	3.11331	3.21275	3.2914	3.36666	3.28324	3.10631	3.18537	3.16914	3.02615	3.13391	3.16434	3.06881	2.89114	2.85659	3.16408	3.07093	3.12494	4.09076	3.38004	3.33532	3.44161	3.12442	4.06702	3.39069	3.25612	3.11165	3.18187	3.36552	3.23828	3.15125	3.32313	2.93434	2.6718	3.1031	3.05837	2.80547	2.98936	3.05419	3.15179	3.12521	2.88065
AC141928.1	4.03896	4.67848	4.1717	4.24647	4.34111	4.42701	4.23603	4.19752	4.21703	4.33523	4.28862	4.36775	4.31071	4.23527	4.24966	4.23749	4.36905	4.34885	4.3284	4.39905	4.42441	4.31339	4.37705	4.31979	4.24966	4.29114	4.47075	4.13078	3.92009	4.72498	4.40696	4.05037	4.42569	4.54188	4.77235	4.67199	4.29169	4.29078	4.69234	3.93846	4.22357	4.12915	4.30256	4.18558	3.48054	4.16902	4.05418	4.81486	4.23561
AC144652.1	4.68522	4.3869	3.87077	4.60431	4.98126	4.94588	4.71608	4.56185	4.52907	4.68063	4.64339	4.46157	4.50394	4.41862	4.50982	4.43808	4.63993	4.46883	4.58953	4.6019	4.54308	4.26843	4.30712	4.54946	4.75005	4.06529	4.54925	3.497	4.15916	4.41594	4.40325	4.26658	4.81711	4.96208	5.87085	4.90271	5.23912	4.30958	4.35064	4.9212	4.49987	4.85164	4.5798	4.39332	4.90698	3.90847	4.15609	4.47617	4.21611
AC145343.2	4.11172	3.82678	3.74753	3.22517	3.79251	3.94199	3.88894	3.78779	3.80831	3.7424	3.64954	3.73699	3.75138	3.74633	3.59905	3.63703	3.74025	3.52492	3.49656	3.7397	3.70508	3.63992	3.74319	3.7224	3.80053	4.36594	3.90813	3.04887	4.19407	3.07223	4.06511	3.7033	3.11571	3.64731	3.78928	3.94073	4.19423	3.9147	3.724	3.56176	3.79483	3.67114	3.44069	3.5283	3.24944	3.91748	3.93904	3.72535	3.60375
ACAA1	7.4342	8.43345	8.63548	7.85696	8.05248	8.61737	8.10856	7.57063	8.07498	8.31998	8.29829	8.35551	8.24841	8.19722	8.1691	8.23989	8.24939	8.18595	8.2123	8.46448	8.24841	8.44832	8.56393	8.21334	8.21044	8.99113	8.32295	7.537	7.9588	8.6508	8.4658	8.14924	7.76162	8.74004	8.19209	8.2009	7.91612	7.36804	7.91537	8.28139	8.27348	8.20848	8.28034	7.9595	7.84649	8.05581	8.00616	8.15488	8.04242
ACAA2	7.07658	7.39344	7.87595	6.96693	7.20335	7.89618	7.45127	7.5931	7.26692	7.38078	7.4971	7.27585	7.23239	7.31191	7.42629	7.38885	7.51355	7.34793	7.46099	7.52984	7.39504	7.55255	7.66947	7.37774	7.33748	7.42805	7.06835	7.24552	7.4742	6.70733	6.51914	8.00456	7.66947	7.86855	7.16917	7.35845	7.01662	6.872	7.11783	7.21051	7.07612	7.63686	7.37387	7.43814	7.15445	7.3795	7.19121	7.88869	7.83236
ACACA	5.35654	6.37211	5.35367	5.91362	5.59464	6.00589	5.68397	5.53373	5.87545	6.01443	6.05356	5.60612	5.61406	5.76033	6.04188	5.65766	5.92637	5.49266	5.60259	5.66779	5.57958	5.80699	6.00414	5.63243	5.59544	6.2353	5.79322	5.82354	5.65245	5.91464	5.7978	5.58626	5.93168	5.91513	5.68174	5.82902	5.49679	5.28878	5.37398	6.18165	5.44032	5.95019	5.66036	5.74841	5.50356	6.23975	5.43887	5.34635	5.19237
ACACB	6.55542	7.04334	7.29562	7.06103	7.11322	8.45578	7.23413	7.58504	7.08779	6.88089	7.88954	7.08192	6.96883	7.32927	7.92899	6.99779	7.88954	6.73347	7.16856	7.12224	7.58815	7.42063	8.05963	6.90082	7.23766	7.65647	7.09536	7.13046	7.15588	6.8797	6.91747	6.89174	8.46448	7.79967	7.41434	7.80324	7.15588	7.00014	7.30684	7.58072	6.44288	7.70359	6.59529	7.01078	6.46696	8.15965	6.83381	7.30044	7.23813
ACAD10	4.23819	4.68101	4.37624	4.31922	4.32937	4.3587	4.38183	4.35759	4.35661	4.43244	4.3316	4.33612	4.33143	4.39364	4.27333	4.33181	4.37265	4.27314	4.21215	4.47579	4.28437	4.48816	4.46715	4.3499	4.3568	4.6093	4.73951	3.66346	3.95537	4.56418	4.35415	4.10878	3.89902	4.25888	4.42952	4.41973	4.33086	4.24498	4.40325	4.59224	4.13246	4.33086	4.73762	4.5218	4.24442	4.41268	4.56282	4.49756	4.91077
ACAD8	6.66597	6.2193	7.22014	7.62431	6.69573	7.8802	7.23075	7.94421	7.38885	7.06429	7.22563	6.61911	6.95039	7.19121	7.08445	6.95712	7.10325	6.82133	7.03482	6.91018	7.20387	6.8205	6.72591	7.07758	7.19566	5.89577	7.33161	6.58159	7.53331	6.32494	6.58599	6.68775	6.7968	6.53583	7.34301	7.05788	6.6489	6.22064	6.42607	7.69989	7.3288	7.34463	7.28946	7.291	7.58448	7.23661	7.8081	7.60271	6.60482
ACAD9	7.83908	7.57655	7.53463	7.36241	7.34847	8.18144	7.31757	7.03529	7.46874	7.49398	7.698	7.53224	7.47951	7.57836	7.68452	7.62617	7.71635	7.53881	7.46652	7.68309	7.61283	7.90501	8.25124	7.59434	7.56053	7.60208	8.03007	7.09486	6.87571	8.02039	7.86329	7.26525	7.30202	8.1155	7.68717	7.87803	7.47951	7.13182	6.96883	7.50166	7.734	7.34567	7.34024	7.80624	7.97273	7.86329	7.87381	7.26692	7.42063
ACADL	3.5431	3.89646	3.75037	4.59895	4.3477	5.93312	4.4373	4.03398	4.42592	4.3572	5.1744	3.99363	4.04606	4.69375	4.81855	4.05492	5.03551	3.83158	4.48014	3.57537	4.98572	4.39559	5.01163	3.91977	4.7102	4.29524	4.81682	3.98696	5.23734	3.2538	3.98955	3.42941	4.77354	4.13625	5.1777	4.88523	4.69716	4.14815	3.83336	4.86833	3.94321	4.72838	3.52635	4.61744	4.63251	5.4422	4.29262	3.87692	3.27125
ACADM	9.86524	10.1735	10.0443	10.5596	10.1341	10.0782	10.6174	11.3426	10.4455	10.3047	10.1773	9.83846	10.1773	10.2259	10.2101	10.1773	10.2182	10.1023	10.3651	9.76098	10.3047	8.61518	8.76663	10.401	10.1981	8.49281	9.62184	9.79577	9.95668	9.12504	8.98206	10.1418	9.5416	9.86524	9.72709	9.81361	9.32377	10.248	10.0443	10.4234	10.6946	10.9495	10.9328	10.5087	10.9969	10.0551	10.8066	11.2651	9.12128
ACADS	6.71002	7.12807	7.69989	6.9	6.90976	7.90163	7.19322	7.64593	7.04648	6.88014	7.37552	7.21248	7.03283	6.99541	7.2165	7.13855	7.29896	6.85704	6.91725	7.27644	7.03572	7.40861	7.76094	6.99198	7.19462	7.40431	6.96883	6.34994	6.8462	7.6953	7.51729	7.2361	6.65965	7.42449	6.9455	7.30633	6.89654	6.60697	7.36745	7.1458	6.1973	7.23132	7.01078	7.30088	6.78289	7.30202	7.18385	7.52732	7.75117
ACADSB	7.0226	5.85507	7.18283	6.40906	6.94947	6.74772	6.9133	6.74304	6.80707	6.76926	6.68851	6.16603	6.72178	6.87571	6.67872	6.58708	6.64744	6.42401	6.653	5.9678	6.81307	6.34461	6.36029	6.81687	6.8974	5.44032	7.03139	5.7078	6.27333	6.14911	6.66003	6.41991	6.20605	6.77626	6.52207	7.04334	6.77058	5.81222	6.02458	7.13706	7.07415	6.70575	6.92418	6.64446	7.51903	6.54886	7.16917	6.67743	5.91679
ACADVL	9.97344	10.7718	10.9248	10.9739	10.5249	11.44	11.0349	11.8303	10.8133	10.1661	11.1171	10.8066	10.8618	10.6415	10.8823	10.7007	10.7718	10.5196	10.7118	10.758	10.8823	10.982	11.171	10.7434	10.7305	11.0349	10.8686	9.87812	10.6542	10.4073	10.5886	10.5647	10.9328	11.5488	10.7855	10.5944	10.5138	10.2912	10.7645	10.6946	10.5886	10.7928	10.7059	11.0183	10.5712	10.8279	10.7782	11.1785	10.9969
ACAN	4.76413	4.91713	4.59068	4.74859	4.95027	4.44883	4.81561	4.79679	4.75775	4.63355	4.60431	4.8631	4.74634	4.60576	4.77513	4.72722	4.70981	4.62783	4.66275	4.89073	4.69927	4.67886	4.7557	4.74529	4.70717	5.5265	5.16792	4.69023	4.12379	5.40673	5.34459	4.92497	4.97599	4.97769	4.8025	4.47269	4.99713	4.65873	5.02282	4.40286	4.67017	4.56897	4.70218	4.34885	4.70961	4.44138	4.38979	4.61081	4.73863
ACAP1	5.4113	5.96393	5.79401	4.98882	5.22554	5.19889	5.34615	5.45153	5.32883	5.04379	5.64423	5.53515	5.37581	5.17461	5.26714	5.31451	5.32774	5.32157	5.2992	5.61669	5.47208	5.61623	5.60089	5.53708	5.34082	5.71853	5.25625	4.58452	5.20866	5.82766	5.755	5.38616	4.70817	5.91823	5.03611	5.34635	5.25625	4.93576	5.3882	5.38984	5.1125	5.6809	5.46239	5.45428	5.315	5.55418	5.47596	5.86525	6.02224
ACAP2	4.80229	4.11437	4.67122	5.01126	4.75328	4.56146	4.59914	4.69354	4.52255	4.76772	4.70318	4.57168	4.61977	4.90799	4.78877	4.67982	4.76112	4.70799	4.71329	4.16109	4.81731	4.61196	4.54129	4.69833	4.84806	3.63864	4.27988	5.55024	4.92098	4.06147	3.95165	4.18124	5.4578	4.47617	4.73538	4.81486	4.97644	5.22418	4.78104	5.36508	4.41705	4.96689	4.92281	4.45056	5.0909	4.8206	4.57473	4.41075	4.06077
ACAP3	5.52339	5.49628	5.738	6.05481	5.90875	5.73773	5.99897	5.98644	5.755	5.48887	5.7125	5.80721	5.69365	5.53834	5.6371	5.62139	5.65323	5.60612	5.59544	5.85898	5.57982	5.73672	5.86013	5.63869	5.68174	6.5761	6.28632	5.76903	4.95419	6.24618	5.29966	5.04338	5.49557	6.81556	5.67732	5.40222	6.03959	5.92095	5.88025	5.48225	5.3986	5.44936	5.81516	5.80721	5.78037	5.78549	5.45983	5.98195	5.97307
ACAT1	5.61202	5.82561	6.4842	5.54633	5.68594	6.55313	5.78434	5.25823	5.87575	5.99316	5.94498	5.7606	5.86721	6.06724	5.90791	5.94153	5.96946	5.85062	5.88303	5.87374	5.89448	6.01838	6.08456	6.00787	5.91464	6.08426	6.24551	5.07858	5.51344	5.58181	5.60905	5.74917	5.15923	6.13681	6.13323	5.51587	5.97752	5.39252	5.53969	6.56604	6.22718	5.69022	6.02404	6.03604	6.38918	5.80538	6.00844	6.34429	5.67759
ACAT2	6.35402	5.38038	5.64375	6.40263	5.72077	6.14884	5.8437	6.01737	6.00787	6.25694	6.15227	5.81763	5.94305	6.13177	5.93747	5.81488	6.15924	5.9673	5.78922	5.92775	5.8392	6.15401	6.30019	6.03838	5.99985	5.83006	6.41505	5.82484	6.42401	5.91513	5.65517	5.97887	6.36803	5.66483	6.04297	6.25471	6.02166	6.08581	5.6939	6.56485	6.62173	6.39017	5.53373	6.09627	6.10141	6.00356	5.39436	5.36614	5.71692
ACBD3	7.34353	7.28216	7.73536	7.76436	8.23043	7.53586	8.01627	8.47117	7.42689	7.6205	7.66235	7.61984	7.66563	7.71213	7.90338	7.811	7.78198	7.84794	7.82486	7.57391	7.71958	7.22811	7.26269	7.47658	7.72161	6.21004	6.06426	8.74157	8.02429	7.61984	7.98234	6.96018	7.20753	7.77505	8.04162	7.74417	7.58882	7.32374	7.42868	7.12025	6.67822	8.42092	8.40273	7.72701	7.81836	7.78762	7.75183	7.93431	7.62361
ACBD4	6.78122	6.16148	6.69142	6.16875	6.06783	6.1983	6.30301	6.55432	6.1866	6.35959	6.37484	6.15864	6.25503	6.53913	6.45823	6.60401	6.62901	6.3194	6.33644	6.56604	6.29344	6.43483	6.47644	6.30301	6.52515	7.32927	6.35928	5.55466	5.69646	6.78624	6.66903	6.54593	6.00494	6.80915	6.26159	6.35928	6.84297	5.93168	6.70856	5.97082	5.84614	6.06928	6.35032	6.60153	5.94605	6.67593	6.53264	6.90893	6.47396
ACBD5	7.37722	6.87611	8.89188	7.80682	7.76948	6.95757	7.30633	7.93431	7.32709	7.76579	7.67265	7.49815	7.47539	7.85841	7.6298	7.66497	7.76883	7.80258	7.8708	7.37494	7.79107	7.05963	7.04797	7.26469	7.74354	6.49229	6.6236	7.40584	7.43592	6.50199	6.73825	7.75606	7.58072	7.06936	8.25603	7.5434	7.4235	8.09446	8.17258	7.97349	8.26557	7.49869	7.74354	7.00427	7.23864	7.51175	7.98081	8.07303	7.30737
ACBD6	7.54874	7.11538	6.92807	6.89461	7.19724	6.81969	7.17583	7.52275	7.05879	7.31191	7.11164	7.15166	7.13046	7.01711	7.06835	6.96883	7.10148	7.07415	6.83547	7.15166	7.01437	7.36076	7.47481	7.07658	7.01612	7.96108	7.0038	7.1097	7.33221	7.24603	7.15115	6.86682	6.73347	7.41034	7.19022	7.21861	7.16385	6.86389	6.72956	6.79061	7.17169	6.90676	7.01029	6.96228	7.36241	7.0723	6.83716	6.59846	6.86167
ACCS	6.53879	7.811	6.86682	6.57683	6.37587	7.10616	6.95839	7.18126	6.78784	6.80826	7.12857	7.00987	6.72064	6.85245	7.10816	6.88353	6.7931	6.67484	6.82336	6.50879	6.85447	6.78784	7.24871	6.9644	6.9567	7.47116	7.68773	6.54886	7.38541	6.13868	6.08237	6.63336	6.83298	8.05722	7.8994	6.29538	7.01217	6.70095	6.91849	6.42575	6.5023	6.99407	6.63709	7.079	7.35774	6.66864	6.92194	7.13417	6.83631
ACD	5.57883	6.07491	6.11591	6.86982	6.13361	6.7746	6.15806	6.02014	6.05836	6.19764	6.49867	6.41048	6.0563	6.35757	6.38237	6.30801	6.32786	6.48805	6.18348	6.30934	6.26784	6.78047	6.877	6.45823	6.20259	6.75968	6.70611	6.46815	6.64525	5.89366	5.8501	6.34904	6.45176	6.02014	6.43909	6.15897	6.8878	6.2203	6.00012	6.03286	6.12832	5.8743	6.14062	6.44992	6.42504	6.32566	6.35625	6.00674	6.24741
ACE	4.96729	4.10878	5.18198	5.26509	4.5385	4.33523	4.6009	4.68406	4.46174	4.76472	4.75163	4.91003	4.81103	4.80097	4.73724	4.74944	4.75953	4.84242	4.69159	4.92456	4.8025	5.03087	4.82642	4.55114	4.94752	4.64999	4.48975	4.5022	3.99947	5.46966	4.56817	3.81474	3.75362	5.06893	4.43151	4.71505	4.56837	4.89209	4.70838	5.45128	4.62189	4.56536	4.79251	5.33738	4.70779	5.34038	4.95459	5.13018	5.29277
ACE2	5.08602	5.07816	5.94125	6.23307	7.11878	4.47899	6.35247	5.07209	5.41469	6.52171	5.55345	4.94326	5.54897	5.32574	5.73594	5.42607	5.7065	5.86916	5.34227	5.47899	5.43841	5.16305	4.99524	5.96393	5.50428	5.38685	5.48653	7.15227	5.52386	4.42189	5.94153	5.63592	6.14854	6.77178	5.77773	5.13888	5.78349	6.74341	6.2193	4.33488	6.36763	4.74362	6.2529	5.15001	6.96833	4.84346	5.21826	4.77235	4.2853
ACER1	4.28898	4.08433	3.67605	4.18388	3.72492	4.65778	4.03741	3.93958	4.10069	3.90457	4.06165	4.19675	4.08863	3.97138	4.075	3.97216	4.08695	4.08123	4.12437	4.2906	4.18309	4.1584	4.14582	4.23478	4.0325	5.18131	4.45901	4.2518	3.74653	4.35661	3.4895	4.05204	3.84556	3.89357	3.71525	4.48782	4.08757	4.45481	4.20122	4.03878	3.95146	3.83336	3.94178	4.46448	3.68846	3.77077	4.15711	4.41017	3.86555
ACER3	4.26322	4.9507	4.44642	5.00218	4.69457	5.67598	4.78642	5.02151	4.89007	4.99463	4.96689	4.70881	4.77256	4.83362	4.97106	4.73015	5.07714	4.77803	4.82864	4.37434	5.03318	4.81584	4.78542	4.87838	4.84825	3.91959	4.46157	5.30693	4.83086	4.40385	4.68385	4.22148	5.29298	4.43673	4.77125	5.02576	5.03149	5.86775	5.72607	5.34349	4.93883	5.0188	4.40172	4.94969	4.6454	5.21331	4.73055	4.34584	4.21307
ACHE	4.86543	4.88789	5.14058	4.89073	5.1513	4.94606	5.3601	5.08374	5.53539	4.72395	5.00175	4.87021	5.25847	4.66802	5.08995	5.04315	4.77535	4.71707	5.11807	5.41156	4.75933	5.16368	5.0719	4.90718	4.86647	5.39786	5.00363	5.43962	5.01919	4.84424	4.7884	6.11902	5.35696	5.61874	5.44987	5.11767	5.09484	5.47548	5.32553	4.16587	3.95071	5.05122	4.90698	4.92056	4.69063	5.00899	4.50046	4.56629	5.13888
ACIN1	6.74973	7.15396	6.79971	6.5746	6.66941	6.84701	7.03659	6.98088	6.94376	6.67444	6.87743	6.95712	6.80389	6.77223	6.82829	6.80592	6.78893	6.72513	6.66782	6.98742	6.64854	7.01343	6.88353	6.81556	6.80006	6.08152	6.74772	6.85289	7.2471	6.53185	6.30266	6.96613	7.06429	5.9862	6.56675	6.54258	6.45731	7.13855	7.18126	6.68505	7.21248	6.76634	7.04838	6.76055	6.39441	6.98722	7.1112	7.39571	7.24018
ACKR1	6.63968	7.47481	4.97066	8.24383	5.16113	5.10057	5.89795	4.88768	5.57194	6.118	6.97601	7.13664	6.62293	6.53062	6.56227	6.25382	6.30859	6.27973	6.22255	6.7931	6.56675	6.52727	6.47988	6.40263	6.66078	7.68906	4.62875	6.33259	4.73581	7.99552	5.08787	7.0047	5.25692	6.53447	4.46803	8.17258	5.4818	7.09375	5.33674	8.03913	5.85277	8.23796	6.07746	7.64799	4.16997	7.37441	4.67813	7.4724	6.09337
ACKR2	3.86799	4.49251	4.43747	4.00117	4.05681	3.88478	4.08049	4.26716	4.13497	4.11043	4.11417	4.14693	4.11401	4.02536	4.06316	4.1127	4.04172	4.00211	4.08957	4.18839	4.13437	4.0096	4.22723	4.08566	4.12683	4.94191	4.10611	3.84535	3.86078	4.48993	4.20176	4.56934	4.44424	4.78188	3.84948	4.41017	4.09281	3.86232	4.14404	4.10791	3.89152	4.00447	3.92199	3.90457	4.13966	3.7395	4.00101	3.98026	4.25961
ACKR3	4.79717	6.33584	6.61327	5.98774	6.60733	6.28432	6.16115	5.59267	5.96133	6.28733	6.07257	6.02432	6.3755	6.05103	6.1461	6.02376	6.13777	6.03928	6.24248	5.94125	6.10494	5.74789	5.62707	6.22418	6.04246	5.61764	5.86301	6.12993	6.9189	4.93046	5.67121	6.75052	7.04984	5.06074	5.72857	6.01322	7.12948	5.80481	6.48732	5.68821	6.15006	6.04445	6.73908	5.73123	6.05662	6.06956	6.53185	5.7323	5.61476
ACKR4	7.13664	4.43015	5.7801	5.11435	5.42558	5.46513	5.55618	5.38964	5.39669	5.81896	5.50066	5.35177	5.58626	5.92862	5.47522	6.00297	4.96827	6.40132	5.91487	4.58474	5.70495	5.06916	4.876	5.8869	5.57501	4.73516	6.73676	5.2992	6.70649	4.15171	4.82662	4.45439	5.80538	4.53011	6.0466	4.51316	6.00875	5.62307	5.29317	5.61938	5.78061	5.40512	5.97227	6.19265	6.93543	5.71308	6.22718	5.59567	5.90369
ACLY	6.35657	6.83588	6.37143	7.62852	6.73908	7.68387	6.73117	6.69039	7.01217	7.5931	7.35014	7.18972	7.03482	7.21198	7.39867	7.00554	7.25949	7.07564	7.01169	7.22361	7.05644	7.25276	6.85994	6.74549	6.98233	6.29283	6.60264	7.11929	6.89135	6.38063	7.23813	6.35587	7.07658	5.78349	7.11217	7.04701	6.95489	7.71685	7.8518	8.06634	6.42126	6.97463	6.5761	7.38725	6.64226	7.60208	6.547	7.0723	7.04797
ACMSD	2.79108	2.63385	3.45691	2.90101	3.3376	3.2923	2.81524	3.09141	3.19806	3.06909	3.04282	2.98912	3.01002	3.05467	3.05419	3.0087	3.0058	3.02932	3.00228	3.14277	2.94139	3.00026	3.0605	3.01002	3.08043	3.76535	3.05729	2.94024	3.03958	3.24493	3.34417	3.08067	2.81081	2.96444	3.18941	2.98488	2.70045	2.90687	2.95225	2.83332	2.79342	3.13209	3.55716	3.15551	3.1247	3.21129	3.43027	3.07738	3.0259
ACN9	6.46382	6.21532	6.2708	5.83562	5.21782	5.45564	5.83509	5.7961	5.96421	6.10435	5.88413	5.7323	6.29573	6.1896	5.96332	5.96302	5.97167	5.89603	6.3718	5.34635	5.93052	4.77513	4.90467	6.3877	6.34616	3.37116	5.62731	4.31181	5.94413	5.81516	5.42248	5.54923	5.09851	4.63936	5.93897	6.18283	5.2214	5.44652	6.04835	6.19067	6.62649	6.41887	6.57168	6.19228	6.12629	6.42664	6.6221	6.7968	4.79698
ACO1	5.432	5.26201	5.8498	6.72346	6.97913	5.91903	5.91596	5.43934	5.98834	6.10948	6.2804	5.82431	5.74106	5.89577	6.33488	5.7577	6.34776	5.73408	5.90542	5.87055	5.9862	6.16756	6.2245	5.75047	5.92481	6.34429	5.88774	6.06394	6.00414	5.61355	6.2322	5.79755	6.38366	6.34714	6.1247	6.32494	5.53639	5.67469	5.74477	6.12196	5.69201	6.44626	5.38421	5.68621	5.61202	6.31575	5.11151	5.95756	5.43392
ACO2	6.94115	6.99779	7.38197	8.00232	7.35957	8.11289	7.57265	7.87235	7.59761	7.36582	7.61857	7.67399	7.49869	7.52589	7.55255	7.59122	7.59248	7.61417	7.44349	7.8818	7.44407	7.45439	7.42293	7.48868	7.51603	6.36902	7.68452	6.17387	7.00099	7.69121	7.82426	7.537	7.12327	8.09354	7.64799	7.58382	7.28946	6.87833	7.79107	7.66497	7.66433	7.57781	7.70561	7.18707	7.06936	7.20048	7.64927	7.79257	8.11386
ACOT11	5.4265	5.71392	5.57168	5.315	5.67732	5.09718	5.48272	5.54736	5.49214	5.36976	5.37581	5.47367	5.44501	5.5171	5.39933	5.51614	5.43962	5.32794	5.41756	5.57282	5.33629	5.4656	5.43059	5.54557	5.49792	6.07981	5.77541	5.02902	5.20325	5.99666	4.88664	5.84593	5.53615	5.96047	5.22275	5.57781	5.28675	5.08158	5.55712	5.96479	6.24683	5.06973	5.66362	5.39436	5.19333	5.29298	5.42853	5.29298	5.323
ACOT12	3.00449	2.80863	2.92571	2.87826	2.46431	2.47509	2.65139	2.54386	2.76438	2.75176	2.67381	2.63745	2.72439	2.73277	2.71112	2.6881	2.7511	2.74697	2.78177	2.62967	2.50047	2.78376	2.76333	2.66971	2.69466	2.95251	2.38426	2.77838	2.82716	2.68846	3.31286	3.16718	2.67455	2.71351	2.82561	2.99947	2.58834	2.84343	2.9431	2.84965	2.79077	2.81241	2.67728	2.69693	2.70363	2.67496	2.66883	2.62598	2.84788
ACOT13	9.6264	9.66677	9.3918	8.48393	8.75987	8.88258	9.04352	8.46017	9.37994	8.99917	9.25431	9.13771	9.38222	9.20097	8.94702	9.12322	9.02057	9.07334	9.50822	9.1448	9.07334	9.06686	9.24074	9.23062	9.35618	8.82285	9.76651	7.17835	9.31071	9.52787	9.96989	9.05193	8.24486	8.87983	8.60107	9.48936	9.10675	8.12764	9.07168	9.02238	9.27326	9.59612	9.85038	9.16185	9.29836	9.58565	9.74419	8.70308	8.42347
ACOT4	5.07736	3.82832	4.82513	5.27106	4.71801	5.48061	4.89112	4.86833	4.88601	4.87298	5.28603	4.77452	4.7256	4.66721	4.97439	4.59669	5.10896	4.75185	4.99242	4.92899	4.98147	5.08095	5.39669	4.43578	5.06544	5.43273	5.00552	5.44527	5.10408	4.98085	5.15739	4.91257	5.06303	5.37969	5.07567	4.86165	4.57842	4.80639	4.64738	4.53455	4.13326	5.23369	4.59189	4.62839	4.36149	5.35134	4.48705	4.74653	4.36149
ACOT6	2.81018	3.26594	3.47386	3.09191	3.55384	3.01626	3.01212	3.18669	3.08117	3.13286	3.22005	3.19345	3.21076	3.15956	3.19945	3.20086	3.20718	3.17809	3.19554	3.10604	2.98912	3.09788	2.87034	3.23658	3.34653	3.70819	4.07725	3.38864	3.20551	3.05837	3.21689	3.35284	3.24147	3.26305	3.19759	3.15956	2.8249	2.71612	3.17332	2.92658	3.06102	3.0018	3.28505	3.31286	3.23335	3.06414	3.25166	3.20622	2.78376
ACOT7	5.65778	6.16875	5.98805	6.42331	5.42947	5.97586	5.84769	5.98736	5.88664	5.96892	5.93687	6.14884	6.04835	5.78403	5.90627	5.90518	5.90542	6.0044	6.01134	6.32427	5.98228	6.26784	6.14854	5.78037	5.81434	6.33042	5.89424	6.1983	5.87734	6.62023	6.71752	6.02561	5.28922	5.62707	5.78654	5.88084	5.4391	5.89953	5.70964	5.66133	5.66309	5.70754	6.14435	6.13593	6.02104	6.22688	5.79558	5.85171	6.35402
ACOT8	6.14943	5.78866	5.56777	5.24956	5.69045	5.46309	5.51876	5.6915	5.65545	5.71979	5.6907	5.65938	5.71666	5.6586	5.63185	5.70306	5.6002	5.56303	5.67551	5.74638	5.47619	5.46195	5.64041	5.48107	5.62089	6.34714	5.72183	5.18418	5.51239	5.84262	6.5341	5.91513	5.63869	5.27928	5.37424	5.76088	5.22399	4.75895	5.57072	5.24752	5.91823	5.65676	6.12196	5.70522	6.04861	5.72284	5.43568	5.47596	5.19763
ACOT9	8.14924	7.14162	8.43011	8.32396	8.31324	7.57957	8.20285	8.30341	8.06887	7.9641	7.95555	8.06965	8.04733	7.92824	8.01368	7.99552	8.04654	8.07049	8.09536	8.29536	8.14332	8.15388	8.12507	8.03692	8.07754	7.69255	7.81253	8.5437	7.8081	8.52332	8.43011	8.22211	7.71894	8.28247	8.13709	8.36998	7.93508	7.99227	7.95639	7.81179	8.42722	7.88558	8.24666	7.66875	8.14488	7.73673	7.59576	7.88259	7.65918
ACOX1	5.74292	5.40627	6.10256	5.268	5.46465	5.53046	5.52774	5.6505	5.54808	5.57411	5.65447	5.46723	5.4818	5.49507	5.62906	5.53687	5.62686	5.47208	5.45407	5.55785	5.47812	5.61975	5.63008	5.62878	5.54322	5.13314	5.11899	6.1964	5.74343	4.77354	5.22206	5.79131	6.22748	5.29339	5.53834	5.51344	5.29114	5.2795	5.33383	5.86113	5.52243	5.61355	5.38331	5.2925	5.61133	5.8392	5.40287	5.4204	5.68221
ACOX2	7.76436	6.54018	8.10315	6.95226	7.27257	7.537	7.27369	6.72915	7.34463	7.34136	7.50457	7.54008	7.2858	7.41147	7.38601	7.49168	7.49815	7.44838	7.47589	7.698	7.43592	7.61479	7.54802	7.45071	7.43592	7.17583	8.18506	6.87611	7.52452	7.62302	7.49227	7.1168	6.30477	7.46759	7.71685	7.36745	7.64927	6.65233	6.70891	7.28061	7.58504	7.08192	7.23766	7.10616	7.83075	7.36189	7.74093	7.26941	7.86263
ACOX3	5.79024	5.91306	5.86226	6.64558	5.62561	6.57197	6.10589	6.34804	6.11563	6.06086	6.02483	5.97034	6.14278	5.895	6.07545	5.94525	6.07605	5.95729	6.00102	6.19101	5.92965	6.07691	6.18776	6.08964	6.00844	6.86432	6.80344	5.94216	6.12687	6.13261	7.09808	5.50215	5.80201	6.02739	5.7474	6.51552	5.87403	5.91564	6.36449	5.47993	5.93168	5.79102	6.09743	5.8501	6.08122	6.17588	6.12751	5.31312	6.04386
ACOXL	3.11498	3.81311	3.51255	3.15451	3.44981	3.41106	3.51803	3.37049	3.36643	3.3502	3.36502	3.33303	3.40876	3.27102	3.36151	3.37179	3.27294	3.28974	3.30672	3.4182	3.35102	3.39906	3.38004	3.45091	3.30216	3.75539	3.46828	3.24854	3.35684	3.60207	3.4478	3.66188	3.50596	3.63172	2.96737	3.37426	3.1796	3.60037	3.53184	3.38802	3.06128	3.33326	3.46386	3.34348	3.18669	3.6217	3.26594	3.71746	3.60618
ACP1	6.05662	6.15924	6.38531	6.7767	6.07952	6.83672	6.29024	5.97835	6.29824	6.61754	6.42196	6.36729	6.4634	6.50806	6.34363	6.3269	6.37073	6.34743	6.50557	6.37925	6.47183	6.58533	6.67048	6.62574	6.55963	5.65602	6.31738	5.79214	6.186	6.2708	6.56523	6.26159	6.15716	5.6661	6.79762	6.37282	6.32036	6.04806	6.72992	6.38665	7.08824	6.46523	6.83631	6.38134	6.60662	6.45283	6.52552	6.52276	5.77492
ACP2	6.12226	6.8067	6.34231	7.28169	6.85994	7.4235	6.44257	7.2109	6.65039	6.47537	6.84833	7.10371	6.68851	6.87156	7.00821	7.11322	7.10728	7.01029	6.71037	7.22212	6.71788	6.71193	6.8067	6.92686	6.6843	7.37774	7.52661	7.29219	6.99827	7.24812	7.74167	6.52096	6.37385	6.92864	6.87073	7.03659	6.66038	6.74385	7.48677	6.43233	6.40399	6.31311	5.98054	6.90459	6.54774	6.80177	6.25537	6.41337	7.70802
ACP5	4.77048	4.33105	4.45767	5.43641	3.78911	4.44386	4.23749	4.62383	4.44424	4.27376	4.50261	4.74362	4.47899	4.351	4.52006	4.80502	4.46505	4.62839	4.57534	4.744	4.60307	4.45668	4.49304	4.96603	4.48537	4.90675	4.47056	4.60329	4.29489	4.39417	3.50292	3.87269	4.00044	4.27816	4.48782	4.2686	4.60834	6.02195	5.22361	4.81731	5.28021	4.23527	4.62365	4.40305	4.58816	4.06472	3.55043	4.59955	4.44564
ACP6	5.10385	5.01329	4.67696	5.73672	6.0102	5.83372	5.65676	5.10339	5.62019	5.697	5.41713	5.41806	5.30302	5.08664	5.03381	5.10975	5.31819	5.33357	5.4058	5.30123	5.48508	5.77247	5.9215	5.57687	5.36399	4.98507	4.94545	5.24036	5.79375	5.5605	5.91847	5.27481	5.38353	6.1504	5.91627	5.23326	5.54682	4.975	4.97276	4.6486	4.94892	5.5595	5.80425	5.56876	5.84126	5.6505	6.06328	5.38918	5.20135
ACPP	3.1649	3.31875	3.39096	3.38281	3.21376	3.4885	3.17063	3.90957	3.16817	3.42068	3.21182	3.21711	3.25944	3.30465	3.33485	3.31261	3.27643	3.26615	3.27507	3.22541	3.25875	3.28953	3.37804	3.28905	3.29415	3.73224	3.38386	4.42818	3.36455	3.5176	2.87284	3.44919	3.11816	3.10414	3.42612	2.98641	2.87405	3.76253	3.38953	3.38429	3.37426	3.73087	3.17788	3.68289	3.27481	3.33036	2.9687	3.14673	3.24048
ACPT	4.53941	5.14632	5.30543	5.12852	4.974	4.8629	4.85288	5.25961	4.95499	4.84221	5.10249	5.02835	5.11899	5.01287	5.05189	4.87801	5.11855	4.94629	5.00109	5.0909	4.94191	4.70463	4.90287	4.90429	4.90534	5.34566	4.24782	4.85145	4.35549	5.56185	4.8833	5.72028	5.24079	4.98329	4.54188	4.45439	5.20583	4.68802	5.04939	5.08095	4.04699	4.90044	4.71862	5.53993	5.17506	4.78208	4.52333	5.53735	5.24491
ACR	4.68279	4.52371	5.01203	4.28949	4.46656	4.49987	4.56951	4.52907	4.61236	4.42023	4.6593	4.66921	4.66065	4.55171	4.57631	4.5214	4.53128	4.5218	4.50242	4.7248	4.82197	4.4248	4.43747	4.54387	4.66682	4.92159	4.52584	4.11401	4.43411	4.76217	5.11618	4.26409	4.449	4.52122	4.47736	5.14166	5.46239	4.1575	4.34188	4.22877	4.38961	4.59709	4.44	4.00813	4.36516	4.43712	4.49269	5.27884	4.90307
ACRBP	4.27237	4.40696	4.62821	4.00813	4.55603	4.46006	4.21894	4.06472	4.24684	4.30292	4.35959	4.35027	4.36396	4.37509	4.32781	4.42549	4.40863	4.45261	4.48516	4.54627	4.41017	4.50005	4.4496	4.37604	4.31806	4.66293	4.56362	4.11858	4.53548	4.56581	3.87232	4.62935	3.95422	4.50124	4.08088	4.07431	3.95422	4.3081	4.80462	4.50647	4.14831	4.27521	4.6156	4.70036	4.27988	4.67848	4.30458	4.95681	4.72875
ACRC	4.31181	3.36782	4.57473	3.92288	5.03968	4.50413	4.36886	4.23291	4.09734	4.74182	4.53532	3.99608	4.43691	4.31163	4.25647	4.04511	4.27059	3.96195	4.32054	3.85825	4.43487	4.32972	4.46941	4.3587	4.4019	3.65659	4.83188	4.29355	5.13378	3.66697	3.94097	3.83299	4.51707	4.18146	4.75795	3.48226	4.648	4.8042	4.38072	4.40602	4.90287	4.48084	4.37356	4.14001	4.87416	4.6517	4.98188	4.0736	3.47828
ACRV1	3.59348	3.82731	3.83531	3.70075	3.81555	3.46319	3.74554	3.60227	3.73799	3.53583	3.79137	3.76697	3.72884	3.71746	3.668	3.70693	3.70932	3.67775	3.63468	3.74259	3.7105	3.5145	3.54119	3.55405	3.68769	4.26264	3.40147	3.65454	3.58473	3.99591	3.93559	3.71388	3.4977	4.09163	3.20574	4.21256	3.74811	3.37624	3.88715	3.88912	3.26788	3.82086	3.61593	3.70469	3.55125	3.74811	3.52635	3.79503	3.98955
ACSBG1	3.56923	3.98841	3.80534	3.25141	3.64833	3.51893	3.59414	3.47627	3.55615	3.38386	3.74378	3.79699	3.72535	3.55902	3.5959	3.62006	3.5873	3.53265	3.5871	3.64591	3.87745	3.37325	3.37828	3.55273	3.4996	3.93193	3.53246	3.11331	3.61315	3.83023	3.98993	4.08584	3.60227	3.62272	3.89646	3.99826	3.54506	3.76175	3.93804	3.60856	3.35817	3.17311	3.71368	3.13508	3.10349	3.63089	3.15892	3.64316	3.56051
ACSBG2	3.51098	3.19403	3.43752	3.4647	3.59135	3.85612	3.62825	4.88043	3.45264	3.13414	3.50086	3.71073	3.4893	3.31711	3.55555	3.4859	3.54162	3.51431	3.47895	3.42832	3.34394	3.05191	3.00898	3.38995	3.33036	4.23636	3.71474	3.35684	3.43685	4.01486	4.45806	3.38165	3.93578	4.67982	4.31311	3.38934	3.90631	3.58605	3.34177	2.82906	3.33954	3.12796	3.51715	3.40629	3.61556	3.10074	3.26738	3.14209	3.26978
ACSF2	7.44645	8.11024	7.22911	7.10006	7.56869	8.89494	7.74966	7.5732	7.79749	7.1675	8.21687	7.57265	7.52092	7.79819	7.95004	7.68309	8.00705	7.33642	7.6298	7.70867	7.78642	7.72373	8.09354	7.73736	7.68309	8.70953	8.82136	7.07997	7.42235	7.55062	7.76094	6.57532	8.01034	8.40067	8.10942	7.60575	7.48505	7.12276	7.50922	8.35044	7.48931	8.11968	7.11985	7.41147	7.05593	8.18506	7.58448	7.66173	7.84336
ACSF3	4.5483	4.62737	4.82474	4.36594	4.62131	4.60834	4.73476	4.73391	4.648	4.60987	4.62076	4.63397	4.56045	4.52027	4.53397	4.57592	4.54685	4.5206	4.53206	4.65516	4.60776	4.75289	4.81914	4.60658	4.56553	5.36332	4.73015	4.38304	4.44	4.83288	5.15778	4.52198	4.64401	5.23112	5.03189	4.70537	4.46787	4.57651	4.56303	4.39016	4.29727	4.34375	4.50025	4.52272	4.4736	4.62036	4.52638	4.33831	4.08049
ACSL1	7.26789	8.18678	9.30645	8.81525	8.05165	9.98689	8.75016	8.37635	8.72285	8.48393	9.50578	8.18043	8.49403	8.95968	9.47489	8.26751	9.49186	8.05079	8.96766	8.41999	9.14145	8.63317	8.83236	8.19294	8.83236	8.31998	7.95162	8.80931	8.92906	7.80883	8.00616	8.49403	9.82631	9.13593	9.02399	9.3758	8.43434	8.05425	8.6223	9.36908	7.52984	9.67816	7.74021	8.4451	7.26692	9.87179	7.72373	9.01386	7.69927
ACSL3	7.73673	7.32436	7.99711	7.37333	8.21944	7.24974	7.95404	7.95315	7.86788	7.89392	7.51903	7.42868	7.60331	7.66111	7.60886	7.66627	7.69255	7.64148	7.70802	7.06518	7.64321	7.51534	7.39058	7.70202	7.6959	7.01304	7.17732	7.73536	8.00057	6.8978	7.56358	7.95162	8.61737	7.82926	7.66805	7.26892	7.59508	7.48253	7.40099	7.64727	7.70635	7.77927	7.31353	7.85098	7.92086	7.72701	7.8472	7.38601	7.02207
ACSL4	4.99463	4.14491	4.43338	5.13521	5.61899	4.95702	5.06646	4.85145	4.92558	4.81651	4.9633	4.95499	5.06303	4.77746	4.90985	4.81227	4.86227	4.83654	5.04897	4.54409	4.81417	4.74092	4.68241	5.28745	4.86146	3.84852	4.57231	5.20027	4.96749	4.62347	4.39977	5.52675	6.35587	4.90596	4.84464	5.40697	4.99182	5.27276	4.85288	4.58912	5.15759	5.04922	4.87717	4.81626	4.34243	4.07285	4.91933	4.90229	4.88664
ACSL5	5.77541	5.74292	6.26088	5.80992	5.60931	6.02773	5.96506	5.80589	5.85224	5.88506	6.00154	6.03222	5.89631	6.01265	5.94719	5.85769	5.92749	6.1482	5.88802	5.96302	6.03254	6.34329	6.13429	5.83315	5.83678	5.96704	5.72454	6.50745	6.20259	5.72313	5.79051	5.08537	6.88486	6.09656	6.31439	5.79375	5.82584	5.92176	6.07352	5.79502	5.88052	5.94004	5.42783	5.54897	5.55466	5.83403	5.56777	5.6118	6.03058
ACSL6	3.53667	3.8064	3.16434	3.90025	3.73364	3.25588	3.6947	3.85441	3.58691	3.58605	3.63335	3.39232	3.44161	3.50963	3.48889	3.5276	3.44645	3.45508	3.49595	3.2951	3.41913	3.4881	3.21255	3.6303	3.61005	2.88096	3.49938	3.13054	3.53933	3.26788	3.4955	3.44352	2.87062	3.36082	3.30623	3.57056	3.25657	3.36241	3.44963	3.99384	3.83263	4.10371	4.3611	3.67172	3.91223	3.43752	4.09993	3.68628	3.3912
ACSM1	3.72593	3.80886	3.47275	3.30147	3.56549	3.28829	3.68212	3.59743	3.60284	3.38782	3.43027	3.48972	3.46169	3.44048	3.47847	3.54054	3.42264	3.48612	3.45535	3.58878	3.51168	3.40787	3.14429	3.48675	3.52592	4.16144	4.32264	3.86388	3.4209	3.37943	3.76983	3.4706	3.56485	3.70133	3.33397	3.9564	3.95406	3.4547	3.54246	3.18076	3.12216	3.22278	3.15255	3.56385	3.35062	3.53066	3.75634	3.20459	3.19165
ACSM2A	2.71461	2.90538	2.97439	2.70586	2.73461	2.76401	2.79541	2.79206	2.68598	2.8508	2.83956	2.87315	2.83197	2.73605	2.74105	2.74139	2.76478	2.65175	2.66559	2.8041	2.74897	2.71851	2.77154	2.6365	2.63608	3.18794	2.86472	2.62462	2.75951	2.67808	2.81081	2.79831	2.78942	3.21665	2.87496	2.808	2.62135	2.54644	2.49292	2.77952	2.54138	2.85831	2.58252	2.95002	2.96789	3.03458	2.99833	2.83044	3.03905
ACSM2B	3.11311	2.90772	3.1887	3.18433	3.19265	2.63066	3.36598	3.31311	2.94917	2.82948	2.84727	2.96309	2.92185	2.86472	2.97545	3.04358	2.99172	2.98292	2.93553	3.04576	3.12042	3.23483	3.45428	3.13004	2.92005	3.24195	3.04358	2.9881	2.69918	3.04654	3.14652	3.18315	3.01437	3.2583	3.20481	3.04625	3.18915	2.78451	3.16281	2.95802	2.856	2.98024	2.91586	3.33083	2.91899	3.4072	2.93099	3.11523	3.16188
ACSM3	3.90774	4.32142	4.21376	3.74185	3.77581	4.4654	3.88231	3.67583	4.08846	4.11529	3.85965	3.95276	4.31409	4.0776	4.22972	3.90534	3.88856	4.24498	4.36328	4.23493	4.26394	4.28898	4.00981	4.05111	4.16051	3.76774	3.58222	5.09869	3.91727	4.04587	4.02798	3.96468	4.35234	3.4756	4.26755	5.00552	4.75371	4.86007	4.24537	4.14118	4.07285	3.60597	3.82304	4.2083	4.77373	4.32819	4.32703	3.26472	3.29164
ACSM5	4.20122	4.8881	4.02152	4.08575	4.09243	5.53782	4.32902	4.13796	4.7248	4.18146	4.56418	4.20259	4.10069	4.50104	4.65677	4.71801	4.54668	4.36308	4.32551	4.44522	4.70362	4.38452	5.21564	4.18576	4.37453	4.37624	4.2083	4.40541	5.18509	3.77935	3.97572	4.72459	5.00919	4.30976	4.58222	4.47701	4.21416	4.62036	4.39181	4.60715	4.44119	4.22377	3.64451	4.09076	3.9877	4.61043	4.11135	4.18008	4.02423
ACSS1	4.92261	5.01695	5.39095	4.65052	4.65092	4.72937	4.99182	4.98532	4.86727	4.8782	4.78704	4.82016	4.73724	4.81791	4.7984	4.83441	4.81322	4.70439	4.77513	4.92299	4.76072	4.96641	5.04439	4.92477	4.88412	5.30345	5.08974	4.45402	4.7188	5.38659	4.74505	4.82761	4.2906	5.19959	4.81471	4.87698	4.92736	4.86703	5.1127	4.65758	4.7978	4.88103	4.70779	4.78977	4.51569	4.79972	4.82255	5.20497	5.17506
ACSS2	7.49464	8.56161	8.68428	7.2617	7.93282	8.01542	7.88725	7.86263	8.08161	8.1232	8.41582	7.97349	7.86925	7.95799	8.37522	7.89182	8.34168	7.79478	7.94112	8.12054	7.95232	8.24666	8.30341	7.9066	7.86125	8.7763	8.25892	7.48505	8.07754	8.12764	8.07914	7.81911	8.46244	8.16136	8.02587	8.27348	7.87235	7.36422	8.00705	8.06553	7.38138	8.40172	7.70867	7.78198	7.28901	8.54004	7.69043	8.03913	7.74846
ACSS3	6.0738	6.24191	7.18385	5.39693	6.41175	6.42367	6.06928	5.57481	6.04776	6.24846	6.40843	6.02104	6.11591	6.43271	6.63049	6.16995	6.58356	6.30266	6.53062	5.76745	6.45595	6.16722	6.54593	6.25102	6.43909	5.85253	5.93687	6.74385	6.70341	5.07736	5.31793	6.15255	6.73223	5.96679	6.34027	6.78084	6.46815	6.10198	6.41856	6.51016	6.07575	6.64377	5.8894	6.13089	5.7741	6.43805	5.98168	6.03088	5.60291
ACTA1	8.28835	8.59162	11.2041	12.7445	12.2808	12.1798	11.2651	9.96989	10.0669	11.0524	10.9656	11.9689	11.4861	9.64214	11.077	9.90651	10.8969	11.6102	10.1146	11.2854	9.72106	10.553	10.2219	11.7068	10.3095	11.7314	11.1013	12.6725	9.56308	12.7677	13.3886	12.2112	11.6938	11.8303	10.2182	11.43	11.9137	12.0099	10.2017	7.38951	10.1262	9.90341	12.2808	9.77261	12.4304	10.1488	7.80258	10.4862	10.2574
ACTA2	7.57781	7.9588	7.13561	8.07837	6.50675	7.50702	7.44464	6.14374	7.70561	7.43346	7.31353	7.79107	7.65783	7.39812	7.64529	7.3923	7.51729	7.42293	7.58566	7.93367	7.42118	7.72835	7.71437	7.65581	7.34515	8.18848	7.89618	8.30826	7.16691	8.28645	8.1999	7.15353	6.53264	7.68841	7.51903	8.83982	7.72974	7.88799	7.63229	7.22014	7.11164	7.07758	6.91018	7.61857	7.3052	7.38362	6.64377	7.8518	7.54533
ACTA2-AS1	3.9188	4.12284	4.2807	4.75592	4.22205	4.08621	4.36868	4.28862	4.38072	4.49735	4.11043	4.1557	4.04917	4.05583	4.2344	4.11454	4.1447	4.17352	4.00813	4.24498	4.21083	4.17707	3.86668	4.21324	4.1755	5.56401	4.94463	4.45202	4.12782	4.35375	4.91217	3.84637	3.96254	3.99176	3.93102	4.73988	4.05618	4.02894	4.02169	4.28604	3.8895	4.13342	3.62028	4.52846	4.24498	4.32457	3.95778	4.21935	4.2256
ACTB	11.3239	11.171	11.2651	12.695	11.4093	12.373	11.7314	11.9942	11.8182	11.7946	11.9689	12.0923	11.7946	11.8061	11.9028	11.8553	11.9263	11.9263	11.7314	11.9942	11.9263	12.0464	11.5756	11.5631	11.7314	10.2827	10.758	12.6468	11.6222	11.6938	11.6562	10.9035	11.3609	10.7305	11.8417	11.6452	11.9558	12.7946	12.5159	12.4528	11.5204	12.1072	11.6562	12.0611	11.5989	11.7946	11.0042	12.373	12.5368
ACTC1	14.122	13.8588	13.9693	14.2023	13.8588	13.9693	14.0527	12.5368	13.9693	14.122	14.122	14.122	14.0527	14.122	14.0527	14.0527	14.122	14.122	13.9693	13.9693	13.9693	14.0527	14.0527	14.0527	13.9693	14.122	14.2023	14.122	14.122	14.495	14.495	14.2724	14.2724	14.2724	14.0527	14.495	14.122	13.8588	13.5966	14.0527	14.0527	13.8588	13.9693	13.8588	14.0527	13.8588	13.7333	13.9693	13.7333
ACTG2	6.03058	5.1829	6.41146	5.69932	5.41223	5.70335	5.73619	5.86013	6.21004	5.65376	5.70208	6.18348	6.04356	5.46895	5.78815	5.68199	5.82431	5.55125	5.89819	6.18105	5.66779	5.66853	5.42467	5.34194	5.68444	6.64525	5.37694	6.74304	4.84107	6.52239	6.88397	6.14245	4.63431	4.83441	5.35742	6.02258	4.40822	6.78007	5.61924	5.79999	5.37044	6.02832	5.23157	6.5706	5.84871	6.43839	5.81975	6.93051	5.68794
ACTL10	5.28856	5.40859	5.00634	4.83188	4.91077	4.50046	4.94191	4.24782	4.8835	5.04605	5.08095	5.11922	4.8881	5.10556	5.14961	5.12978	5.11718	4.94382	4.94588	5.09032	4.96641	4.77431	4.82532	4.93595	5.08158	6.10742	4.6694	5.33987	4.92858	5.49002	4.30789	5.65676	4.5792	4.76732	4.09664	5.0551	4.41185	5.03902	4.73391	5.19509	5.1561	4.80229	4.92899	5.45516	4.56779	5.11556	4.78662	5.35222	5.26942
ACTL6A	6.67951	5.59968	6.70456	6.61985	6.25316	6.54223	6.6818	7.11929	6.52796	6.50113	6.42764	6.34058	6.48315	6.58874	6.5891	6.4705	6.62023	6.74425	6.69898	6.55467	6.54952	5.36662	5.23778	6.53622	6.52026	4.73351	5.96755	8.08424	6.84051	6.16722	5.79974	5.95672	5.81578	5.12371	5.95584	6.25694	5.89689	6.5999	6.56043	6.61287	6.59595	7.01029	6.78247	6.92292	6.91455	7.01217	7.3929	6.7415	5.22816
ACTL6B	3.8247	3.96294	4.43786	4.37247	3.97769	4.28494	3.94666	4.1299	3.91625	3.87615	4.0065	4.1755	4.08716	4.12493	4.21066	4.18839	4.18403	4.24987	4.22221	4.46331	4.13418	4.0248	3.87803	4.03913	4.10758	4.72855	4.31089	4.25943	3.49527	4.38011	4.736	4.46715	3.75673	4.16198	3.76432	4.29336	4.32457	3.89736	3.92612	3.9911	4.08028	3.65579	4.66648	4.20139	3.53184	4.25758	4.21762	4.48917	4.06511
ACTL7A	4.82574	4.22503	4.88479	4.7102	4.6158	4.78329	4.57631	4.91153	4.61916	4.61688	4.83382	4.86777	4.79292	4.54988	4.53908	4.69945	4.69539	4.68303	4.61061	4.92519	4.63355	4.34715	4.44076	4.75005	4.70652	4.69234	5.3855	4.13717	4.1041	5.27481	5.75721	4.73971	4.96127	4.28756	4.1514	5.06802	4.31622	4.67217	4.4313	4.68044	3.98122	5.50166	4.71548	4.49735	4.82101	4.46392	4.65854	4.6802	4.63636
ACTL7B	3.83413	3.22305	3.75751	4.13437	4.56741	4.73971	3.83373	3.68526	3.84245	4.16587	4.15958	4.23527	4.26194	4.2178	4.12036	4.08433	4.28718	4.24857	4.17224	4.2059	3.98733	3.63864	3.2846	3.96025	4.0932	4.95981	4.22304	3.43486	3.91372	4.44622	3.94781	4.5549	3.17684	3.55468	4.22686	4.24322	2.9405	3.48529	4.41841	3.8009	4.30086	3.97718	4.24625	4.49909	4.35583	4.2459	3.96072	4.012	4.3153
ACTL8	4.96249	6.25316	5.67598	5.31203	5.25737	5.01736	5.17111	5.42581	5.19373	5.42064	5.5	5.77807	5.56999	5.38174	5.45847	5.56	5.41513	5.31549	5.28724	5.70181	5.07454	5.23586	5.26022	5.22379	5.36129	5.7144	5.16557	4.93138	4.40269	5.99695	5.91087	4.72914	5.19576	5.54206	5.31043	5.87512	5.21874	5.19741	5.61575	5.11453	4.90738	5.32995	4.99878	4.87877	5.22998	5.45339	5.18882	5.77541	6.36978
ACTL9	2.96958	3.61492	3.88231	3.09321	3.08443	3.33168	2.8821	3.01412	3.19759	3.36312	3.53201	3.55295	3.46744	3.31016	3.3856	3.28258	3.33212	3.26235	3.24854	3.15726	3.26713	3.32757	3.02882	3.5628	3.19994	3.63133	2.95225	3.4647	3.62234	3.97238	3.44505	3.55445	3.06338	3.38144	2.65036	3.13183	3.05112	3.48337	3.43812	2.63251	3.30972	3.70057	3.56051	3.77975	3.09191	3.33123	3.14112	3.8106	3.32757
ACTN1	8.48262	8.49281	8.07754	9.24862	8.8355	8.54733	8.72422	9.66942	8.83091	8.69239	8.58777	8.89985	8.78436	8.40172	8.75851	8.61518	8.55307	8.6223	8.61012	8.87833	8.52706	8.79299	8.63445	8.73752	8.51553	9.05685	8.58185	8.82534	8.18316	9.08384	9.80187	8.57576	8.87352	8.60247	8.58654	8.53517	8.48393	9.17139	9.4828	8.28835	8.37841	8.66574	8.84708	8.27348	8.28344	8.51216	7.93282	8.6777	9.11613
ACTN2	10.2101	9.54621	10.2655	10.8563	10.9887	10.5364	10.6609	11.077	10.5249	10.4754	10.2219	10.418	10.3468	10.3095	10.3095	10.4862	10.4703	10.4505	10.3414	10.4703	10.2259	10.4344	9.99347	10.5596	10.3414	9.72426	10.1378	9.88115	9.57817	10.553	10.9328	10.5249	10.4073	10.9495	10.1098	10.583	10.3468	9.91627	9.89734	10.3514	10.5596	10.1301	11.0693	10.4604	10.842	9.8749	10.401	10.4129	10.401
ACTN3	4.53712	4.67982	4.55876	4.49269	4.38452	4.39398	4.36648	4.7827	4.66866	4.33143	4.46581	4.52494	4.55815	4.51843	4.53941	4.52333	4.56877	4.38265	4.46697	4.59524	4.39654	4.45502	4.56457	4.69194	4.37973	4.58714	4.79619	4.0156	4.22168	4.46697	4.3578	3.77333	3.78399	4.96273	4.85164	4.1584	4.31311	5.00195	4.84221	4.37917	4.68385	5.07054	4.52749	4.05658	4.37761	4.26075	4.46196	5.06074	4.90761
ACTN4	8.03187	7.8655	8.23431	7.48005	7.53817	7.53331	8.25531	8.10315	8.10942	7.85555	8.04496	8.14842	8.06553	7.76368	7.99469	7.73192	7.8655	7.86125	7.7603	7.99227	7.66747	7.98	7.89618	7.60007	7.86855	8.50256	7.55995	8.07135	7.03482	8.97878	8.11641	7.23813	7.22513	8.49403	7.70134	7.55062	7.57063	8.74157	8.10315	8.32194	7.30139	8.25326	7.50397	8.16555	7.04504	8.16043	7.27585	8.24383	7.725
ACTR10	9.9095	9.24862	10.3798	10.3414	10.3231	10.1488	10.3231	10.1735	10.3281	10.1301	10.1854	10.0036	10.1262	10.1981	10.0244	10.1697	10.0849	10.1098	10.1893	10.0337	10.2741	10.0957	10.1146	10.0782	10.248	9.66677	10.1223	9.55329	10.3853	9.80778	9.81991	9.72709	9.58565	9.89034	10.6473	10.1058	10.3912	10.1981	10.0551	10.4455	10.2259	9.93122	9.8353	10.0628	10.583	10.1577	10.7118	10.048	9.51054
ACTR1A	7.45248	7.3795	7.39571	8.30447	7.43646	8.12852	7.70427	7.49815	7.77012	7.67265	7.80883	7.94808	7.74769	7.7305	7.82346	7.73268	7.78762	7.82426	7.64859	8.01467	7.67325	7.90883	7.88799	7.64653	7.66497	8.12424	8.09886	7.56358	7.51355	7.98458	8.57828	7.46099	7.64391	7.9255	7.82426	7.79405	7.76739	7.00335	7.25686	7.62559	7.91042	7.52092	7.73536	7.77584	7.36634	7.27905	7.37774	7.56053	7.91332
ACTR1B	8.1381	7.81536	8.01467	7.90808	7.4724	7.85327	7.66805	8.29734	7.69669	7.94571	8.02275	7.99385	7.97831	7.82346	7.82058	7.77836	7.85327	7.89036	7.76948	8.04331	7.78198	8.1691	8.11968	7.81986	7.94351	7.96568	8.22211	6.88668	7.08735	7.96188	7.91769	7.47364	7.46339	8.45383	7.90732	7.86405	8.26847	7.57008	7.74696	7.74555	7.52452	7.48505	8.05581	8.04817	7.62431	8.22678	8.06965	8.11469	8.20369
ACTR2	5.5295	5.2076	5.0042	6.42867	5.65602	5.98168	5.46309	5.6482	5.52898	5.69985	5.61527	5.74161	5.53993	6.04604	5.81922	5.95301	5.98704	5.99256	5.80802	5.64116	5.84569	5.52868	5.43568	5.6482	5.84104	4.05297	4.72686	5.92403	5.39071	5.26022	5.54557	5.92321	6.50636	5.30426	6.00908	6.14974	5.91934	6.0902	5.876	6.25537	5.61741	5.76481	5.78219	5.37944	5.35344	5.53993	5.44579	6.03781	6.01499
ACTR3	8.07135	7.76672	7.6959	7.70713	8.01883	7.04543	7.80324	7.50109	7.78642	7.86644	7.84267	7.72021	7.75254	7.9358	7.81536	7.83604	7.79478	7.95004	7.91042	7.44055	7.92466	7.59829	7.3795	7.82207	7.85774	6.87112	6.94861	8.91491	7.77584	7.77584	7.50109	7.76368	8.03994	7.55557	7.43814	8.09354	7.46706	8.35259	7.57957	8.09182	7.80258	7.79034	7.63167	8.031	7.77431	7.88404	7.53756	7.67265	7.18126
ACTR3B	4.74634	3.85286	5.23586	5.58726	5.21396	5.1526	5.0184	5.24999	4.95459	5.082	4.96729	4.7469	4.87915	5.14761	5.11312	4.84941	5.00088	4.94048	5.01563	4.74484	5.05212	4.80192	4.91954	5.04123	5.015	4.96539	4.5423	5.07607	5.56253	4.54425	4.53223	5.39347	5.00154	4.18688	4.8206	4.59566	4.70142	5.23132	4.47342	5.23778	5.70937	4.86727	4.92962	5.24274	5.32529	4.50647	5.04897	4.79597	4.14582
ACTR3BP2	3.319	3.36528	3.49506	3.04358	4.03678	3.86668	3.49979	3.68943	3.47915	3.54876	3.27369	3.54379	3.41736	3.58605	3.63547	3.51715	3.41713	3.44375	3.4305	3.63512	3.38023	3.18563	3.31516	3.30283	3.4796	3.64316	2.99668	4.42681	3.18118	3.48702	3.45758	4.39364	3.73248	2.84211	3.24785	2.76021	3.4511	3.33418	3.874	3.21255	4.06953	3.60811	3.5276	3.29736	2.95087	3.74203	3.57077	3.69816	3.63442
ACTR3C	4.46803	5.10697	4.87953	4.27969	4.66393	4.32203	4.69638	4.60855	4.44939	4.50589	4.21177	4.63697	4.60411	4.3879	4.49417	4.61256	4.38203	4.66025	4.736	4.90429	4.60615	4.77983	4.82474	4.45146	4.54524	4.994	4.42513	3.91769	4.16552	4.10335	4.75551	4.90044	4.2258	4.93118	4.94364	4.66275	4.48313	4.65092	4.8374	4.48445	5.05338	4.35323	4.48917	3.92104	4.12702	4.94849	4.9892	4.53644	4.53908
ACTR5	5.20885	5.01541	4.63312	5.59193	5.0893	5.71392	5.24999	4.93558	5.19288	5.19482	5.28724	5.28043	5.29603	5.29091	5.26736	5.27276	5.33917	5.31379	5.24733	5.3239	5.31379	5.26573	5.26293	5.32367	5.3387	5.78995	5.3572	4.74549	5.27235	5.55154	5.80024	5.33406	5.13458	5.05405	5.33017	5.28697	5.50746	5.00065	4.9429	5.34012	4.76655	5.26093	4.84506	5.77005	5.53228	5.1822	5.13314	5.00755	4.54326
ACTR6	6.20073	5.06955	5.74763	5.51093	5.83033	5.33107	5.64266	5.0125	5.67121	5.60832	5.5595	5.39812	5.73973	5.88559	5.73179	5.7419	5.64722	5.69825	5.71776	5.1827	5.71802	5.32574	5.41223	5.71643	5.98347	4.26362	5.16858	5.47497	5.82224	5.01091	4.85226	5.68294	5.65938	4.46941	5.3378	5.04566	5.61476	5.74244	5.21352	5.84769	6.76182	6.02801	6.19483	5.88914	5.59167	5.79024	6.23041	5.76856	5.08787
ACTR8	6.51774	6.25262	5.89982	6.34904	6.42541	6.49797	6.44356	6.82336	6.32909	6.45694	6.17838	6.32354	6.20321	6.23783	6.29157	6.34027	6.25471	6.29157	6.2079	6.5052	6.23249	6.51701	6.57305	6.50157	6.16265	5.58204	6.09656	6.0708	6.17067	6.2222	6.60926	6.50713	6.28199	6.71709	6.78749	6.21746	5.93052	6.14213	6.80389	5.95019	6.57936	6.32786	6.57424	6.30477	6.48099	6.17527	6.42664	5.85253	6.42126
ACTRT2	4.23749	3.79599	4.34903	4.16164	4.20005	4.73452	4.25217	5.40697	4.27255	4.01038	4.23423	4.3508	4.24948	4.19888	4.2059	4.34224	4.29469	4.07846	4.08103	4.12416	4.1219	3.91111	4.0419	4.32303	3.9977	5.14127	4.58261	4.02702	3.42612	4.32744	4.49929	3.99194	3.97238	5.22489	3.89589	4.33733	4.1755	4.32551	4.65209	4.51687	4.71669	4.02817	4.4163	3.89967	3.67739	3.98714	4.07744	4.29808	4.51531
ACTRT3	4.65437	4.09936	4.30866	4.4311	3.94413	4.11877	4.27201	4.48917	4.32436	4.46823	4.19588	4.1867	4.24123	4.20259	4.27414	4.21466	4.11914	4.14658	4.10629	4.23009	4.12514	4.55244	4.48294	4.29524	4.15673	4.94871	5.11351	3.96043	4.55876	4.17295	4.4468	4.13458	4.39146	4.33308	4.45601	4.29028	4.46467	4.09936	4.05681	4.12532	4.01674	4.0957	3.81002	4.33506	4.40806	4.11548	4.53317	3.86879	3.84984
ACVR1	8.55916	8.02924	7.94112	7.83908	8.10315	7.3288	8.06965	8.47929	8.41905	7.88404	7.75183	7.81321	8.03994	7.8994	8.0894	8.02275	7.95713	8.1232	8.03007	8.03436	7.79967	7.87381	7.57719	7.97105	7.9066	6.42575	7.95713	8.58654	8.58185	7.02306	8.39967	7.69255	8.4658	6.74304	7.92976	7.87308	8.34742	8.18144	8.47245	7.55874	7.72021	7.87734	8.22299	8.02275	8.32876	7.95799	7.88102	7.93727	8.10768
ACVR1B	4.31714	5.03189	4.27431	4.56877	4.46842	4.95133	4.53296	4.42329	4.56817	4.55441	4.48255	4.60815	4.56629	4.49452	4.47935	4.54506	4.54065	4.58063	4.5235	4.80135	4.56968	4.64109	4.59935	4.59483	4.47469	4.30596	4.63716	4.6476	4.62839	4.50691	4.84086	4.93718	5.08243	5.03551	4.31771	5.06222	5.05037	4.50046	4.48856	4.33691	4.22091	4.46923	4.66233	4.51644	4.2418	4.46639	4.55208	4.14331	4.70439
ACVR1C	3.38972	3.62128	3.3335	4.52732	4.88705	6.87483	4.91403	4.41613	4.78087	4.10518	5.81272	4.06953	3.62458	4.92962	5.95613	3.52614	5.81272	3.56443	5.11878	3.45535	5.40445	4.46621	4.67906	3.46531	5.02453	4.8378	4.52866	5.42807	5.76951	3.26523	3.62209	2.82655	5.9049	5.55024	5.46966	5.85118	4.70817	4.05658	4.419	5.46285	2.95195	6.41544	3.33011	4.61081	3.34443	6.06236	3.51748	4.43502	3.24899
ACVR2A	6.56412	6.10435	6.58635	5.47367	5.97562	5.74608	6.34714	6.50199	6.2481	6.13972	6.01413	5.9533	5.93664	6.09961	6.03143	6.10494	6.09305	6.03118	6.03143	5.61623	6.13058	5.97138	5.78891	6.04578	6.00326	5.2902	5.41734	6.85411	6.60222	5.14848	5.30216	6.01322	6.283	6.12751	5.92176	5.43461	5.7849	6.25886	5.57581	6.40095	6.29671	6.62131	5.92833	6.21246	6.1083	6.24002	6.33081	5.6497	5.94929
ACVR2B	5.80481	5.16984	5.55927	4.95981	5.3855	5.0188	5.43546	5.26068	5.46421	5.30101	5.17347	5.1207	5.2005	5.21714	5.24528	5.31335	5.24616	5.25625	5.23088	5.31725	5.26641	5.31091	5.33245	5.36952	5.27702	5.2291	5.50551	5.00658	5.10871	5.38941	5.20843	5.00776	5.46966	6.48905	5.50023	4.74549	5.52147	5.07921	4.99585	5.49241	5.18154	5.12026	5.10493	5.23667	5.38199	5.19654	5.84924	4.94306	5.21961
ACVR2B-AS1	4.83362	4.81626	4.11858	4.81731	4.49568	4.3881	4.73538	4.6979	4.84464	4.42313	4.47974	4.65371	4.53223	4.67238	4.61456	4.61157	4.67017	4.61877	4.60676	4.86437	4.58892	4.23855	4.16015	4.37801	4.29078	4.58614	4.63504	4.41128	4.56685	5.53301	4.00613	5.00979	5.18154	5.78461	4.43521	3.64591	5.16095	4.22466	4.72822	4.41918	4.1527	4.95641	4.90003	4.42364	4.50712	4.71287	4.34243	4.32142	3.74514
ACVRL1	6.07319	6.16182	6.4525	5.54604	5.63639	5.4038	5.80676	5.58003	5.70449	5.81628	5.79945	5.90223	5.89173	5.7736	5.97109	5.98854	5.97887	6.09163	5.89311	6.14213	5.85611	5.88888	6.06204	5.77332	5.85482	6.59089	6.1253	5.738	5.55125	6.73464	6.25503	5.94771	6.27804	6.11361	5.40743	5.54416	5.20325	6.2067	5.99869	6.00154	5.29473	5.8792	5.67813	5.92884	5.46629	5.53492	5.04666	5.60419	6.02511
ACY1	4.36556	4.50084	4.46803	4.04208	4.46099	4.0122	4.59128	4.3813	4.49269	4.17311	4.13025	4.43187	4.25458	4.09362	4.1225	4.13418	4.17387	4.18048	4.19215	4.46236	4.1955	4.75371	4.49342	4.30866	4.28165	3.98714	4.21376	4.43964	4.32092	4.77609	4.55529	4.13418	4.16806	4.52006	4.70142	4.29634	4.20944	4.04879	4.35138	3.94761	4.43356	4.63875	4.67378	4.01278	4.36535	4.30105	4.16266	3.92385	4.93456
ACY3	4.23423	4.01694	4.16587	3.68313	4.1755	4.00299	3.91587	3.85536	4.04156	3.88174	4.07234	4.06454	4.05334	3.83471	3.81189	3.87383	3.89752	4.03173	4.06334	4.15805	4.16495	4.14773	4.20736	4.21935	4.1357	4.10391	4.20736	3.81555	3.96156	4.61959	3.83625	4.34566	3.92176	4.00981	3.90325	4.14675	3.76352	4.15024	4.40305	4.12604	3.57675	4.13061	4.39695	4.0025	3.8249	3.61492	3.72471	4.40752	4.15326
ACYP1	7.20596	5.99138	6.83381	6.48732	6.93945	5.94184	6.64525	6.47469	6.32494	6.40475	6.43909	6.14463	6.71304	6.7972	6.42126	6.30738	6.44058	6.59529	6.75578	6.45823	6.73192	6.27427	6.50079	6.83084	6.54223	5.80562	6.6512	5.17919	6.17284	6.50303	6.51882	6.44196	5.65347	6.17588	6.40942	6.67322	6.52918	6.69898	6.46595	6.59595	6.64628	6.79219	7.04148	7.50397	7.4342	6.79971	6.99243	6.97829	5.65376
ADA	5.68971	6.65005	6.70695	5.91002	5.54633	7.09015	5.98774	5.93977	6.12106	6.44595	6.23066	6.40027	6.16265	6.30019	6.27747	6.28599	6.39441	6.51188	6.50382	6.42664	6.24493	6.40095	6.15158	6.27617	6.15681	6.21155	6.78817	5.4204	6.49576	6.12501	6.88969	5.15001	5.82584	5.88387	6.39957	5.57432	6.24462	5.87708	7.01304	6.16995	6.15501	5.9049	5.90897	6.50079	6.94416	6.17387	6.85793	5.97337	7.04023
ADAD1	3.30672	3.04069	3.19994	3.32551	3.16517	3.51556	3.40991	3.23406	3.32647	3.07648	3.17164	3.23751	3.23008	3.26176	3.1988	3.20928	3.2407	3.1744	3.20185	3.21445	3.3024	3.16914	3.19708	3.41777	3.14574	3.80107	3.42548	3.76371	2.97679	3.62069	3.4796	3.19165	3.14626	3.55555	3.23483	3.20648	3.41352	2.89697	3.1636	3.27733	3.59721	2.66213	3.15179	2.94443	3.16546	3.13342	3.28214	3.30074	3.3858
ADAD2	5.07343	5.42015	5.34847	4.88251	5.04789	4.70594	4.8829	5.21694	5.00634	5.08118	4.99263	5.19626	5.10249	5.00678	4.99852	5.03635	5.07299	4.97706	4.99692	5.30998	4.98393	4.9214	4.9423	5.1718	5.24908	5.79916	5.09975	3.80204	5.14524	5.41266	5.45271	5.06973	4.71669	4.90467	4.71444	4.90044	4.35027	4.56991	5.30406	4.94708	4.81877	5.21048	5.33943	5.23842	5.1183	5.30766	5.27744	5.697	5.59267
ADAL	5.82509	5.19217	5.81922	5.01434	5.22753	5.28386	5.1526	5.51812	5.42336	5.20885	5.05	5.15696	5.24999	5.14545	5.30674	5.29786	5.2699	5.28629	5.49815	5.27481	5.38398	5.1777	5.23797	5.41734	5.40673	5.15173	5.37424	4.83541	4.90779	4.58797	4.98126	5.8138	5.48508	4.60754	4.85	6.03781	5.56675	5.06241	5.59544	4.46639	5.00487	5.37648	5.59786	5.30884	5.66729	5.65829	6.29727	5.54711	5.2841
ADAM10	6.37385	5.14586	5.99138	6.90082	6.71469	5.94472	6.19955	5.61433	6.3755	6.4699	6.34027	6.14245	6.23621	6.60697	6.31137	6.47748	6.34231	6.46028	6.47675	5.66187	6.54091	6.02773	5.9106	6.27838	6.35274	4.27272	5.11979	6.5535	6.29283	4.809	4.97027	6.16083	6.50983	4.86205	6.19984	5.7047	6.11331	6.80915	6.6316	6.579	6.58566	6.44666	6.53019	6.4398	6.85411	6.11868	6.43662	6.80093	6.59563
ADAM11	6.2097	6.57792	5.40151	5.49815	5.29091	5.99666	6.09272	6.04297	6.24342	5.5845	5.66853	5.9358	5.82683	5.57781	5.50454	5.7042	5.54368	5.51876	5.63055	5.97532	5.72503	6.05417	5.94929	5.58102	5.70365	6.55313	6.13229	5.20259	5.20114	5.90765	5.77886	5.85742	5.58128	5.81975	5.23868	6.0489	6.17503	5.47715	5.70987	5.94153	6.0024	5.23932	5.35115	6.05599	5.5614	6.25347	6.16051	6.2353	6.57713
ADAM12	3.96956	3.66504	3.67208	3.65134	4.01393	4.49528	3.77375	3.91649	3.67405	4.07631	4.11384	3.76213	3.77817	3.84852	4.15711	3.74302	4.05658	3.72094	3.82659	3.70951	4.10103	4.08884	4.2581	3.72158	3.98974	3.42201	3.43812	3.99233	3.84786	3.84984	4.43053	3.37271	4.93863	3.73224	4.10138	3.83752	4.06932	3.77817	4.85452	3.71971	3.62667	4.13362	4.06835	3.64071	4.13115	4.02133	3.90341	3.55384	3.53667
ADAM15	5.73619	5.74966	6.01356	5.7762	5.21694	6.03398	5.5595	5.65649	5.64018	5.66187	5.85611	6.28164	5.94362	5.77722	5.85359	5.89745	5.83241	5.92016	5.57282	6.16115	5.74219	5.96047	5.77275	5.64241	5.72732	5.17707	5.41781	5.6075	4.441	6.33717	6.3217	5.47452	5.51344	6.22188	5.8408	6.29121	5.5969	5.58076	6.34158	5.55345	5.60697	5.70678	5.7619	5.56474	5.83315	6.13681	5.49418	6.151	6.5503
ADAM17	4.91736	4.88251	4.85226	6.15131	5.65912	5.83163	5.33383	5.46938	5.43079	5.54088	5.40627	5.59087	5.77032	5.5386	5.55443	5.3855	5.48248	5.69341	5.31725	5.28221	5.39414	5.2741	5.2795	5.15819	5.22837	5.5151	5.42424	5.76088	5.6515	5.59786	5.60343	5.26341	5.78061	4.88848	5.09416	5.12546	5.38867	5.4348	5.82303	6.07802	6.2481	4.84561	5.2425	4.77007	4.98147	4.78125	4.91793	5.04958	4.77068
ADAM18	3.06727	2.82007	2.98779	2.59472	3.06702	2.73647	2.89546	2.69888	2.99357	2.68598	2.83872	2.85297	2.71612	2.89513	2.84727	2.86291	2.84987	2.88671	2.87714	2.89987	2.72661	2.77916	3.04332	2.87187	2.80863	2.99859	2.88183	3	2.80585	3.22409	3.02721	3.16136	2.86253	2.9566	3.23751	2.7938	2.79479	3.16596	2.83398	2.70002	2.84022	2.96391	2.60629	2.74606	2.67846	2.66129	2.57568	3.04443	2.86012
ADAM19	5.64423	5.45081	4.30558	5.71415	5.64774	5.83678	5.69487	4.60389	5.52573	5.70495	5.44698	5.57432	5.45516	5.3116	5.51685	5.46371	5.5151	5.48131	5.42539	5.86748	5.20602	5.44627	5.3345	5.52454	5.491	5.67176	5.17242	6.22188	4.86936	6.03058	6.50451	4.99792	5.18656	5.97227	5.70546	5.65493	5.56422	5.10845	5.78037	4.71801	5.20987	5.2007	5.97804	5.53943	5.52121	5.44174	5.15236	5.32973	5.04544
ADAM2	2.77882	3.01491	2.74932	2.46017	2.70209	2.80477	2.86629	2.60247	2.68557	2.78942	2.78209	2.77462	2.75765	2.85627	2.80248	2.80092	2.71652	2.78788	2.61328	2.654	2.67532	2.77731	2.66086	2.68177	2.80123	2.9566	2.83771	3.24147	2.56889	2.99542	2.8006	3.18359	2.50986	3.06627	2.56158	2.55447	2.6067	2.89195	2.78276	3.03511	3.01102	2.63251	2.74329	2.68889	2.79514	2.85454	2.83956	2.58682	2.79895
ADAM20	4.02857	4.46429	4.04879	3.72649	4.13189	3.93139	4.10012	3.93595	4.13078	4.13679	4.03987	4.11729	4.05133	3.86096	3.91242	3.98606	3.92808	4.00998	4.01351	4.08123	3.98788	3.86483	3.72179	4.09627	4.03085	4.33792	3.85536	3.37006	3.52955	4.32972	3.92495	4.0397	3.9735	3.83796	3.83263	4.33851	3.56989	3.80866	3.84165	4.0193	3.78637	4.2474	4.0988	4.42895	4.01771	4.34282	3.92612	4.40806	3.96254
ADAM21	3.43462	3.63531	3.63275	4.12476	3.45645	3.66125	4.05037	3.92513	3.94271	3.65114	3.4547	3.44895	3.34761	3.57099	3.5354	3.65808	3.64852	3.53719	3.53911	3.51846	3.61356	3.63423	3.34653	3.69433	3.39166	3.6627	3.30261	3.59951	3.27851	3.65309	3.67033	4.16127	3.91316	3.53123	3.62397	3.82342	3.99291	3.70894	3.04013	3.62048	3.60227	3.49209	3.23483	4.54744	4.38488	3.74355	3.4366	3.93595	3.4946
ADAM22	3.71091	3.51491	3.48995	3.85231	3.72072	3.41528	3.6682	3.5456	3.66405	3.60681	3.54421	3.48358	3.51298	3.58447	3.54379	3.54506	3.50573	3.46257	3.5019	3.47702	3.58583	3.66188	3.63423	3.59433	3.6401	3.85712	3.61336	3.31135	3.31113	3.41667	3.45349	3.90534	3.58473	4.02914	3.53911	3.88325	3.99493	3.51189	3.80363	3.68966	3.46386	3.31286	3.53143	3.84769	3.86838	3.71644	3.68855	3.48441	3.53871
ADAM23	5.07429	4.71465	5.64543	5.51042	4.9544	5.16323	5.27318	5.32726	5.46394	5.06476	4.9382	4.99463	5.04647	5.16922	4.84447	5.18528	4.92497	4.95399	4.99085	4.89153	4.95936	5.20987	5.27904	5.25391	5.01287	4.71763	5.3592	4.61725	4.6093	4.56342	4.69457	5.20217	4.77746	5.06222	4.88987	5.25234	5.36059	4.8272	4.34487	5.71643	5.62462	5.09739	5.18927	5.43641	5.07567	5.13274	5.51139	5.54682	4.96147
ADAM28	3.69171	4.06165	3.82416	3.80921	3.80385	3.4756	3.63592	3.73989	3.54379	3.91691	4.24102	3.83186	3.72158	3.92233	3.7686	3.61575	3.73624	3.85749	3.74355	3.54119	3.88639	3.99176	4.00283	3.69333	3.78865	3.17487	3.39788	3.78125	3.69797	3.59699	3.36936	3.38281	3.71309	3.91354	3.8009	3.75509	4.13398	4.2758	3.89752	4.44642	4.02423	4.80034	3.76292	3.84675	3.51214	3.73107	3.15576	4.41208	3.94646
ADAM30	3.41845	3.44991	3.54119	3.26738	3.10659	3.46924	3.36171	3.3543	3.41153	3.2004	3.32015	3.34783	3.31846	3.25542	3.2794	3.29374	3.23635	3.24854	3.33691	3.34443	3.32735	3.26738	3.24707	3.4756	3.22331	3.22305	3.32669	3.32386	3.16434	3.39743	3.85965	3.28302	3.50331	3.14062	3.36082	3.51431	4.00431	2.8821	3.5374	3.38842	3.24493	3.44181	3.34921	3.58796	3.21275	3.71971	3.46236	3.01299	3.52592
ADAM32	3.63681	2.68557	3.55488	3.2447	3.82249	3.36847	2.98189	2.91707	3.00026	3.74302	3.67188	3.60767	3.56882	3.44138	3.25257	3.24195	3.26808	3.33975	3.28418	3.20648	3.43883	3.80148	4.10119	3.3463	3.51803	3.55295	3.94986	3.75404	3.67114	3.02643	4.11384	3.65134	4.23458	3.38368	3.79859	3.5302	3.4697	3.30825	3.10518	3.52454	3.44542	3.35312	3.43003	3.37426	3.70988	2.97306	2.9176	3.02172	3.02959
ADAM33	6.5706	7.73883	6.80948	7.04425	6.49722	6.78705	7.22014	7.34024	7.1207	6.88441	6.86567	6.94594	6.8765	6.72915	6.81235	6.91364	6.82012	6.74549	6.97194	6.94679	6.71945	7.1028	7.20491	7.13417	6.87156	7.8994	7.26469	6.92807	7.33423	7.29507	7.25023	6.71115	7.079	8.05339	7.6205	6.8067	6.49328	6.84458	6.75297	6.61641	6.26664	6.95086	6.74506	7.08339	6.8205	7.15541	7.0893	6.72023	6.89174
ADAM3A	3.06076	3.42478	3.03245	2.63792	2.93494	3.04793	2.93525	3.03745	2.81182	2.95572	2.91677	2.96789	2.89286	3.1438	3.14501	3.25332	3.02776	3.08495	2.98269	3.09412	3.04332	2.8356	2.59819	2.62085	2.91559	3.01023	2.97117	3.55716	3.59177	3.28806	3.11089	2.91325	2.60035	3.05916	2.88065	2.96958	2.70125	3.11216	2.5751	2.98591	2.99437	2.69058	2.84343	3.40173	3.22706	3.14775	2.34679	3.30648	3.26523
ADAM5	3.58305	3.3294	3.73047	3.26062	3.19925	3.22962	3.25566	3.28528	3.53583	3.22784	3.35196	3.43115	3.38368	3.25992	3.2976	3.38761	3.36552	3.38995	3.37828	3.56201	3.31237	3.53471	3.48268	3.33954	3.31335	3.10819	3.71193	3.69309	2.86044	3.42326	3.84618	3.69881	3.55844	3.86368	3.72492	3.65241	3.47014	3.25041	3.40304	3.01329	3.45582	3.18457	3.23185	3.04414	3.54182	3.46076	3.21129	3.41777	3.41083
ADAM6	4.34261	3.84694	3.90439	3.49595	3.72593	3.54791	4.03458	3.96785	3.84889	3.98568	3.69413	3.72649	3.74594	3.83148	3.78708	3.8217	3.85197	3.8351	3.89221	3.90025	3.68132	3.92425	3.95716	3.73681	3.77478	3.97572	4.49699	3.92441	3.18053	4.11366	4.21935	4.09301	3.73445	3.43486	4.25217	4.3578	4.17241	3.82925	4.1948	3.86428	3.45714	3.84712	3.77601	3.74653	3.56385	3.75138	3.83284	3.78135	3.73933
ADAM7	3.12339	3.04141	3.24122	2.97788	3.48316	2.92264	3.16622	3.10489	3.24967	2.95631	3.09113	3.11067	3.08271	3.08271	3.05317	3.03796	3.06021	3.1438	3.1172	3.12216	3.20301	3.10819	3.26808	3.14801	3.06805	3.39458	3.10233	2.78109	3.15477	3.38628	3.45153	3.15911	2.70665	3.35284	3.18433	3.22784	3.04576	3.30487	3.25282	3.24967	3.28689	3.0802	3.33809	2.90335	3.3928	2.91325	3.18891	3.08549	3.14359
ADAM8	4.47639	5.00776	5.21564	4.37416	4.61916	4.60695	4.69811	4.70652	4.6726	4.53729	4.79619	4.83044	4.72838	4.72256	4.76133	4.60431	4.66844	4.64637	4.8633	4.84825	4.74339	4.74775	4.81672	4.62402	4.74362	5.12524	4.28643	4.39348	4.63151	5.30738	4.05618	5.01563	4.32781	4.78896	4.43634	4.13698	4.39616	4.65988	5.19351	4.56105	5.45315	5.19109	4.50493	4.82355	4.38011	4.73015	4.68608	5.08178	4.94871
ADAM9	5.15107	5.43668	5.48703	6.08035	5.2699	6.13295	5.80721	5.80024	5.82029	5.77773	5.74608	5.53449	5.7047	5.83059	5.67759	5.70572	5.5899	5.67072	5.79322	5.08262	5.71105	5.5	5.35245	5.59786	5.70754	3.9886	4.6716	5.5265	5.18353	4.85345	4.88458	5.57194	5.0893	4.98085	5.82303	5.91679	5.40082	6.60557	6.33322	5.85454	6.07171	5.92691	5.83731	5.78549	6.115	5.64041	5.37744	6.56412	5.49317
ADAMDEC1	3.86631	3.10872	2.71928	3.47517	2.85659	2.97065	2.79997	3.97082	3.10097	2.95854	4.40734	3.06522	3.01299	3.7516	2.91434	2.84631	2.89376	2.84987	2.95031	2.61701	3.79776	2.99886	3.02459	2.99726	3.40394	2.75524	3.31311	2.83011	3.41552	2.82364	2.49746	2.744	2.96142	3.2361	2.94558	2.79441	3.10791	3.78179	3.6465	4.58333	3.50311	5.6155	3.4351	2.99385	2.52338	2.83364	2.85397	4.16532	2.58791
ADAMTS1	6.08215	6.41991	6.34934	8.12675	7.29507	8.50256	7.39504	6.15681	6.93945	7.13755	6.92194	7.32602	7.95091	7.07463	7.18542	6.65726	7.2617	7.12597	7.86997	7.39812	7.47539	7.13905	6.78749	7.77669	7.09066	4.90985	6.16817	6.52622	6.23947	6.89174	6.85754	7.59695	8.40675	6.84747	6.85489	9.05685	9.18371	7.50922	7.32436	7.35845	5.83163	8.78436	8.42228	8.34742	7.30684	6.86817	7.02033	7.52337	6.14491
ADAMTS10	5.31974	6.10775	5.48556	4.83006	5.16689	5.28159	5.26364	5.52504	5.20473	5.10513	5.36528	5.54997	5.37923	5.23691	5.32367	5.42494	5.38015	5.40063	5.41266	5.67497	5.23281	5.39973	5.5588	5.36802	5.24932	5.88191	5.4603	5.34012	5.24776	6.1823	5.9106	5.86389	5.24056	5.86166	5.3685	5.28791	5.21804	4.78483	5.4229	4.61338	4.95824	5.2502	5.75526	5.39159	5.43986	5.45128	5.12196	5.59519	5.37044
ADAMTS12	4.41745	4.41128	4.73271	3.96734	4.4394	4.75795	4.23695	4.01432	4.36494	4.70943	4.68324	4.53492	4.43846	4.39579	4.64209	4.3619	4.52828	4.41667	4.46732	4.5423	4.49929	4.34188	4.50183	4.35605	4.50841	4.73411	4.31275	4.25647	4.59955	5.21376	4.52884	4.17216	4.43691	4.65371	4.85248	4.73906	4.17427	4.48368	4.36291	4.60891	3.45153	4.50124	4.32703	4.47189	4.30274	4.74729	3.88349	3.91034	4.20463
ADAMTS13	5.12957	4.91099	4.46157	5.33674	5.41781	5.10205	5.20391	5.24183	5.27659	4.84825	4.94111	5.04338	5.0564	4.96108	4.99984	4.96042	5.02369	4.96249	5.0152	5.22837	5.03506	4.92032	5.05558	5.06737	4.99019	5.68868	5.07033	4.51275	5.38378	5.14415	5.0616	5.23238	4.47342	4.52654	4.68608	4.77664	4.8358	4.96438	5.36998	5.09032	4.91604	5.3354	5.29298	4.88685	5.13189	5.14741	5.10429	5.2701	5.40627
ADAMTS14	4.70162	4.32286	4.9507	4.6299	4.63919	4.24442	4.87376	4.66921	4.76554	4.61236	4.46486	4.63919	4.53419	4.41208	4.47524	4.61317	4.53984	4.46842	4.42269	4.59991	4.53261	4.8054	4.55992	4.64521	4.48084	5.2734	4.66844	4.49511	4.34429	4.06663	4.64903	4.47449	4.7229	5.13521	4.33632	4.45421	3.80775	4.32264	4.91872	4.49286	4.75412	4.63013	5.05257	4.78366	4.358	4.60695	4.20024	4.6822	4.92378
ADAMTS15	4.6802	5.65938	5.23755	5.61133	4.97004	5.54416	5.50428	5.76745	5.44367	5.26112	5.29062	5.2625	5.36895	4.92616	5.11577	5.09851	5.3116	4.93138	5.02228	5.39182	5.10697	5.59814	5.56974	5.25758	5.1829	5.80773	5.22554	6.3128	5.48131	5.36083	5.86473	5.42312	5.87861	5.30609	5.02941	5.57282	5.73949	5.30011	5.23417	4.78935	4.66739	5.67149	4.99852	5.03068	4.90429	5.41399	5.16389	4.91198	5.1526
ADAMTS16	4.1097	4.40997	4.62657	4.27076	4.07828	3.6463	3.99571	4.36905	4.20699	3.80941	4.04587	4.14056	4.08488	4.08757	3.99571	4.21742	4.15043	4.15895	4.15731	4.41075	4.07631	4.358	4.09439	4.25961	4.2853	4.90534	3.96881	3.60207	4.16942	4.22205	4.2286	4.2803	3.93504	4.0932	3.93271	3.94139	4.29096	4.01753	3.93709	3.81573	3.97138	4.25853	3.98658	3.63152	4.14097	4.21501	4.49231	4.70902	5.03087
ADAMTS17	3.43135	3.54421	3.18407	3.72435	3.33442	4.09844	3.54699	3.51893	3.43027	3.69616	3.56464	3.56403	3.63659	3.5132	3.45735	3.42899	3.47915	3.39718	3.42941	3.50018	3.37715	3.59368	3.4883	3.59288	3.29996	3.64852	3.06805	4.2083	4.07463	3.73781	3.32575	3.56595	3.83953	3.41913	3.63275	3.29805	3.40557	3.98788	3.30648	3.65286	3.26953	3.18891	3.2077	3.74594	3.22833	3.73544	3.35149	3.95795	3.55273
ADAMTS18	3.67956	4.03549	3.91769	3.59996	4.40035	3.81354	3.97512	4.26529	3.87844	4.0193	3.74355	3.80711	3.88794	3.80793	3.79658	3.72158	3.74871	3.66542	3.79933	3.77375	3.80385	4.012	3.86956	3.83796	3.66618	3.68011	4.10813	4.63414	3.59614	3.81416	4.06472	3.75518	3.8682	4.15553	4.01413	3.6957	3.60702	3.6066	3.9566	3.83857	3.47895	4.18615	4.09459	3.75262	4.58573	4.59309	3.64531	3.71214	3.24707
ADAMTS19	3.0605	2.91298	2.64858	3.14801	3.19734	3.45001	3.04388	3.22005	3.25707	3.61109	2.94199	2.8981	2.96516	3.04604	3.00258	3.04308	3.04951	2.95542	2.87253	2.85573	3.08271	2.95402	2.9379	3.08733	3.01412	2.62877	2.839	2.76981	3.06474	2.88156	2.78479	2.71224	3.06805	2.84695	3.14062	2.87125	2.67419	3.12822	2.92264	3.02691	2.84874	3.2077	3.12391	3.58283	3.29164	3.6957	3.56236	3.28858	3.58389
ADAMTS2	4.64339	4.4654	4.71959	5.57982	6.00589	5.68469	5.09327	4.85182	5.0184	5.3572	5.38151	5.36307	5.60235	4.98085	5.52094	5.3583	5.39414	5.23951	5.27789	5.47054	5.18047	5.55154	5.40267	4.99504	5.33497	5.11211	5.42947	5.69365	4.89739	5.43617	6.0466	4.93326	5.33357	4.73271	5.86775	5.0399	5.28089	5.40929	5.8811	4.54171	4.81605	5.11677	5.52025	5.37671	6.15006	4.96965	4.68663	4.4504	4.90489
ADAMTS20	2.71224	2.98106	2.74968	2.50516	2.71612	2.79342	2.7044	2.80512	2.69621	2.76229	2.68136	2.62919	2.69621	2.72292	2.7149	2.72222	2.68639	2.6919	2.65581	2.66129	2.66929	2.81182	2.75176	2.62839	2.70626	2.5227	2.67455	3.00921	2.8365	2.79441	3.14749	2.87562	2.46326	2.92237	2.89666	2.8359	2.67306	2.95771	2.73427	2.9853	2.63297	2.60489	2.78579	2.6019	2.6175	2.61275	2.66167	2.73495	2.76613
ADAMTS3	3.63767	3.66841	4.00576	3.80107	5.43013	3.79154	4.76808	3.92808	4.47935	4.744	3.94396	4.34715	4.81672	3.98916	4.36886	3.91863	3.9535	3.90211	4.06373	3.41442	3.70313	3.73544	3.35896	3.8275	4.09187	5.13378	3.22081	6.19329	4.86146	4.46311	3.46386	4.91339	4.47036	4.09076	4.85498	4.10774	3.29593	5.08908	4.26587	3.68925	4.21935	4.76254	4.17013	3.97609	4.28331	3.6781	3.13813	3.48462	3.49251
ADAMTS4	4.41477	4.78859	4.89228	4.98147	4.18839	4.5564	4.66377	4.38245	4.60389	4.63075	4.4635	4.67965	4.60389	4.6019	4.62575	4.70068	4.67832	4.54848	4.64999	4.80034	4.52638	4.39673	4.46787	4.73561	4.53128	4.21664	4.13208	4.59483	4.33691	5.34659	5.71979	4.44789	5.13001	4.36032	3.77116	5.47743	4.39348	4.47718	4.90738	4.61061	4.62241	4.49029	4.55208	4.49819	4.59427	4.43595	4.51335	4.5973	4.46787
ADAMTS5	4.13641	6.1866	5.0938	4.77687	5.31746	5.35521	5.47029	5.02835	4.96603	5.40123	4.89051	4.94951	4.96901	5.05872	5.12582	5.1526	5.22731	5.12174	5.30058	4.35047	5.53492	5.14207	5.23088	5.09696	5.24595	5.81069	4.81187	5.37534	5.59412	4.80836	4.28255	6.40475	5.11743	5.99316	4.89133	6.02224	5.37606	5.99051	4.56817	5.16305	4.32628	5.34615	4.27431	5.34082	4.62241	5.29226	4.64521	4.99942	4.36681
ADAMTS6	3.47014	3.44161	3.05294	3.17463	3.37715	3.3169	3.34058	3.1709	3.4122	3.35869	3.23382	3.2162	3.24355	3.2976	3.25542	3.23805	3.27125	3.25875	3.22177	3.1988	3.3683	3.4024	3.3425	3.31286	3.19391	3.19734	3.09295	3.3912	3.19049	3.2819	3.85516	3.27125	3.88504	3.60313	3.04769	3.25967	3.2776	3.60476	2.96984	3.45938	3.69836	3.4478	3.33928	3.38004	3.15983	3.33011	3.19215	3.17765	2.80343
ADAMTS7	4.73988	4.95005	4.56951	5.19482	4.93558	4.79127	4.94728	4.95089	4.91443	4.67793	4.79232	5.0059	4.88745	4.76013	4.75249	4.81791	4.88623	4.78045	4.84221	5.02266	4.79494	4.90407	4.95255	4.84242	4.93595	5.14272	5.06822	4.10449	4.96042	5.01002	4.76594	4.88065	4.55458	4.69966	4.61595	4.43226	4.72765	4.4711	4.76237	5.05384	4.79169	4.72256	5.2041	4.90489	5.23542	4.98759	4.974	5.29942	5.67469
ADAMTS8	4.88768	4.73971	4.28185	5.10185	4.03567	4.14526	4.55079	5.10533	5.12936	4.27539	4.35817	4.48877	4.75185	4.28476	4.29395	4.43376	4.26896	4.33851	4.47449	4.55775	4.31108	4.5798	4.62593	4.30494	4.37304	5.39327	4.13382	4.7984	4.37549	4.44	4.79801	5.88535	5.08354	4.53569	4.02333	4.43825	4.06775	4.8378	4.56437	4.36308	4.07252	4.46291	4.36812	4.72055	4.20628	4.61838	4.1867	4.4373	4.31658
ADAMTS9	4.11347	5.73042	4.69945	4.47378	4.42023	4.80077	4.82556	5.05615	4.79619	4.72075	4.68861	4.80986	5.03443	4.64051	4.70859	4.65717	4.80923	4.6736	4.69771	4.63312	4.64169	4.67776	4.42642	4.60596	4.56494	4.67946	3.93251	4.62657	4.33943	4.60389	4.28992	5.82877	5.66187	4.93518	4.57392	5.22624	5.0589	6.04356	4.88128	4.38583	4.49158	5.43344	4.8327	4.67397	4.53455	4.53908	4.34566	4.21103	4.22091
ADAMTS9-AS2	3.93007	4.72376	3.73145	3.97912	4.32036	4.14196	4.20064	3.94139	4.13607	4.04956	3.94742	3.98455	3.96063	4.14526	4.02057	4.05224	4.00299	3.93367	4.01466	3.90939	4.06702	4.38413	4.30031	4.11748	4.15061	4.13151	4.27059	3.72923	4.36212	3.7033	3.55696	3.76556	4.39253	4.6956	4.14118	4.00682	4.83382	4.13477	4.33925	4.36345	4.03701	4.01062	4.04721	4.25888	3.92592	4.06529	4.7927	3.98696	4.30347
ADAMTSL1	3.99807	3.30876	3.36286	3.76054	3.63113	3.7516	3.48379	3.39146	3.58028	3.6867	3.5339	3.55736	3.60856	3.59224	3.63806	3.56343	3.619	3.64091	3.62379	3.6219	3.54506	3.84263	3.75813	3.68906	3.57812	3.56236	4.22446	3.85326	4.15343	3.64472	3.83186	3.33326	3.47079	2.81829	3.83625	3.40765	4.13856	3.6503	3.85905	3.55295	3.58817	3.35596	3.85252	3.45873	4.08863	3.42899	3.52673	3.38023	3.7686
ADAMTSL2	5.38752	5.41447	5.01329	6.50947	5.99578	6.74385	5.71415	5.30717	5.60905	5.93344	6.07605	5.98406	6.03752	5.71802	5.66508	6.13361	5.98168	6.13838	5.992	6.07545	5.81922	5.96077	6.31537	5.80721	5.81845	6.28228	7.14677	5.00381	6.47675	5.13189	6.45067	4.51896	6.16355	5.42269	5.81197	5.43934	6.6077	6.23403	7.26999	4.97171	6.07746	5.24205	6.33685	5.69177	6.00494	5.19763	5.9049	5.61623	6.6059
ADAMTSL3	5.53515	5.11312	6.06669	6.42083	6.07257	6.42969	6.07924	6.02511	6.12501	6.29892	5.7736	5.77247	5.89689	6.05131	5.86499	6.13777	6.10198	6.04776	5.86863	5.89868	5.8955	6.0729	5.82002	5.85689	5.91411	4.68724	6.11242	5.58582	6.09627	5.56581	6.07491	5.23521	5.68016	5.78627	6.13441	5.64141	6.55467	5.95239	6.37587	5.91435	6.59529	5.5265	6.00182	6.28366	6.28836	5.59135	6.38366	5.992	6.24279
ADAMTSL4	4.36941	5.41945	4.25688	4.77068	4.21376	4.28417	4.96042	5.02248	4.96003	4.48592	4.58816	4.77089	4.60911	4.48631	4.35661	4.60246	4.50883	4.53206	4.58452	4.5769	4.6698	4.58495	4.41384	4.47508	4.13796	4.78997	5.42853	4.5186	5.0088	4.51687	5.17506	4.16997	4.91099	5.06737	5.06074	4.45864	4.72017	5.18307	4.95481	4.37175	4.17992	4.03586	4.03857	4.26569	4.27969	4.07943	4.26988	4.29469	4.5973
ADAMTSL5	4.41495	4.95621	4.23657	4.51456	4.81914	4.63855	4.50473	4.53046	4.42549	4.58119	4.55114	4.58912	4.62222	4.41954	4.5235	4.49987	4.49175	4.5705	4.56437	4.84065	4.3354	4.56105	4.37356	4.63151	4.53624	4.85	4.20574	4.24421	3.84579	4.58835	4.96901	4.62205	4.36972	3.89794	4.70025	4.3031	4.52907	4.33925	5.03968	4.16072	5.00278	4.65835	4.78463	4.34282	4.4404	4.73476	4.32571	4.55621	5.37446
ADAP1	6.28366	7.21353	6.57936	6.02801	6.27943	6.23916	6.1866	6.60482	6.25039	6.54556	6.54159	6.57168	6.45992	6.41753	6.40061	6.66152	6.45694	6.45067	6.42801	6.78203	6.48388	6.45823	6.36835	6.46955	6.42607	6.77541	6.73155	5.32205	6.09133	7.12948	7.1823	6.4685	5.91794	6.97788	6.16355	6.41115	6.31997	6.28763	6.64819	6.37014	6.2353	6.54631	6.45358	5.96302	5.81547	6.49476	6.14339	6.82662	7.31249
ADAP2	5.85586	6.81112	6.03809	5.77693	5.69487	6.12595	5.96617	6.14007	5.82327	6.04944	6.15864	6.34869	5.56185	6.219	6.04944	6.28006	6.08215	6.3118	6.14213	6.09305	6.15072	6.46446	6.50713	6.28199	5.82197	6.38808	6.44356	6.02907	6.57572	6.06509	5.97967	5.19109	5.35677	6.60222	6.4525	5.5645	5.70833	6.24101	6.09656	6.34525	6.43805	6.34904	5.70335	6.0102	5.68064	6.10589	5.88859	6.53801	6.36252
ADAR	9.544	9.28993	8.75294	9.16557	9.03094	8.93773	9.24074	8.7969	9.33931	9.38702	9.21916	9.33032	8.9706	9.15801	9.10517	9.11236	9.07748	9.24656	8.97878	9.16368	9.28795	10.048	9.50578	9.18931	9.10675	9.54849	9.2326	9.51298	9.51764	9.02238	8.83687	8.97731	9.18371	9.35186	9.00549	8.75294	9.25247	9.55329	9.25247	9.30854	8.92763	9.15801	8.72561	8.95308	8.56507	10.059	9.72426	9.19157	9.38953
ADARB1	5.02835	5.4204	5.06241	4.80778	5.02555	4.67342	4.96249	5.21851	4.92921	4.91504	4.97619	5.05449	4.98716	5.03149	5.02345	5.05427	5.06802	4.90509	4.95089	5.14014	5.0502	4.95027	4.88542	4.86103	5.03233	5.40883	4.75391	4.76013	4.49382	5.7151	4.89918	5.48748	4.61688	4.81187	4.63636	5.09206	4.77431	4.92477	5.13296	5.08832	4.82662	5.29362	5.14657	4.96945	4.98349	5.00734	4.75592	5.38353	5.23238
ADARB2	4.35885	4.44622	4.06932	3.95891	4.14424	4.26264	4.40905	4.44463	4.35514	3.95006	4.08603	4.21083	4.10504	4.01541	4.04763	4.06663	4.09917	4.09825	4.08261	4.24966	4.07054	4.24893	4.1357	4.11228	4.13342	4.50362	4.44445	4.04977	3.89458	3.91489	3.93867	4.48669	4.14732	4.43578	3.56073	4.52511	4.07182	4.14118	4.74463	3.93615	4.1753	4.0932	4.10466	4.05882	4.08603	4.01278	4.50066	3.92732	4.60011
ADARB2-AS1	4.88043	5.68693	6.13261	4.89639	4.92299	5.54657	5.37327	5.75664	5.64321	5.12563	5.39786	5.43841	5.40997	5.34503	5.28745	5.47054	5.39049	5.25692	5.28768	5.33383	5.26489	4.90675	4.98862	5.00195	5.25452	5.1677	5.24572	5.4229	4.21818	5.89845	5.4267	5.12346	4.77983	5.72387	5.2734	5.46938	5.21739	5.31226	5.52774	5.3702	5.16451	4.62095	5.19871	4.89051	4.97791	5.26391	5.58855	5.63081	6.1247
ADAT1	5.77516	4.74008	5.98736	6.0303	5.46285	5.12936	5.57331	5.16812	5.41806	5.64869	5.72129	5.48805	5.56422	5.52823	5.72937	5.50697	5.6244	5.60517	5.64468	5.24823	5.56876	5.55545	5.80511	5.43059	5.4578	6.58159	5.92936	5.45847	5.40151	5.97835	5.45223	4.95321	5.13679	6.05448	5.83731	5.6002	5.87002	5.1393	4.86975	5.39364	5.41314	5.36914	4.74339	5.59387	5.32277	5.2841	5.23821	5.51411	5.25119
ADAT2	3.95853	3.61751	4.18893	4.2459	3.62397	4.10316	3.84889	4.26623	3.75734	4.00682	4.06055	3.90515	3.99176	4.05133	3.8897	3.90418	3.96616	3.88814	3.79043	3.67976	3.87513	3.93726	4.09163	3.98382	3.82715	4.75933	3.92269	4.20848	4.56223	3.80775	3.65218	3.48508	3.99608	3.69956	4.44501	3.88488	3.66504	3.90147	3.43462	4.2041	4.18484	4.41784	3.66561	4.22446	4.23855	3.68769	4.32937	3.85252	3.08294
ADAT3	5.39717	6.27202	5.59193	5.34082	5.52433	5.2925	5.53664	5.52999	5.56726	5.3831	5.57527	5.74638	5.58855	5.50258	5.54971	5.60161	5.59759	5.58322	5.57501	5.70546	5.54579	5.5171	5.63493	5.50092	5.5151	5.95729	5.8091	5.30609	5.13805	5.90706	5.85926	6.10319	5.79558	5.74292	5.2795	5.5525	5.31639	5.54251	5.497	5.52479	5.08432	5.5275	5.64571	5.5067	5.21331	5.5205	5.51665	5.14802	5.59294
ADCK1	6.27553	6.94335	6.08488	5.82327	6.38063	5.89603	6.20414	6.05749	6.31137	5.99283	6.10803	6.25565	6.13417	6.12288	6.18414	6.11936	6.10648	6.06394	6.12703	6.40433	6.12751	6.49041	6.50113	6.21812	6.08845	7.05177	6.65726	6.23916	6.09656	6.35465	6.79479	6.41572	5.93717	6.57751	5.86389	6.04297	5.88506	5.81948	6.21306	5.65098	6.34492	6.03058	6.2708	5.86775	6.11868	6.28502	6.0268	6.12595	6.52311
ADCK2	5.47345	5.33519	5.19959	5.54115	5.36782	6.08702	5.54088	5.42312	5.57935	5.43059	5.60905	5.62183	5.50551	5.432	5.47899	5.48934	5.50454	5.55177	5.45428	5.64749	5.45892	5.82952	5.7978	5.45293	5.47184	6.34633	5.8894	5.71484	5.50697	5.85635	5.74315	5.20782	5.53449	5.61997	5.41756	5.60722	5.43546	5.37114	5.32089	5.49139	5.39572	5.26001	5.19675	5.25191	5.14961	5.43344	5.0989	5.38242	5.83974
ADCK3	6.22971	7.61155	6.76839	6.45319	6.43011	7.05468	6.54516	6.51115	6.62131	6.54055	7.14779	6.83381	6.84953	7.05229	6.85411	6.8978	7.01854	6.8205	6.78857	6.82416	7.08245	7.02397	7.0601	6.74857	6.89951	6.42293	6.90412	5.36825	6.41714	6.23278	6.35175	6.52311	6.35341	6.75141	6.92513	6.81152	6.8797	6.32206	6.15618	7.22763	6.50745	6.63709	6.54739	7.35713	6.56827	7.0893	7.11411	7.51903	7.46339
ADCK4	4.79494	5.61741	5.2007	4.98126	4.72153	4.89312	4.99564	5.02776	4.89494	4.89783	4.838	4.98779	4.91153	4.76217	4.86683	4.89293	4.87279	4.91973	4.8323	5.14248	4.88925	5.2627	5.39525	5.01348	4.744	5.42558	4.99792	4.8633	4.84044	5.72834	5.69201	5.25758	4.83884	5.45516	5.06433	4.94588	5.09909	4.80836	5.28264	4.54668	4.81833	4.86249	5.28089	4.94028	5.03572	4.77168	4.78188	5.05449	5.11084
ADCK5	4.01021	4.42345	4.79738	5.06454	4.68763	5.1433	4.65018	4.93242	4.68544	4.71959	4.91116	4.91403	4.88065	4.64738	4.67238	4.49665	4.60069	4.5917	4.60231	4.81003	4.61378	4.89454	4.69139	4.59224	4.65798	5.81712	4.86414	4.32264	4.31049	4.59991	4.99692	4.95766	4.38583	5.05189	4.3044	4.01351	4.68101	4.86027	4.30086	4.7982	5.2425	4.40752	4.84923	4.56124	4.60891	4.93698	4.70122	4.45626	4.9212
ADCY1	4.55136	5.19959	4.293	4.47543	4.31658	4.5317	4.45076	4.59606	4.55857	4.54251	4.46715	4.55458	4.52584	4.59087	4.58041	4.58737	4.5977	4.59566	4.51097	4.62402	4.55264	4.65113	4.67458	4.49909	4.5767	4.80209	4.24421	4.10758	4.20482	4.66454	4.31752	3.98841	4.42895	4.77314	4.66065	4.73391	4.57786	4.45583	4.1854	5.05317	4.40716	4.62916	4.18893	4.80943	4.40659	4.51877	4.46561	4.42856	4.36075
ADCY10	3.42874	2.76917	3.36406	2.96204	3.17684	3.21026	3.05139	2.89546	3.01132	3.27899	3.00842	3.1026	3.05837	3.13908	3.1143	3.19806	3.13711	3.13342	3.09816	3.12598	3.29805	3.49312	3.60392	3.15748	3.26062	3.40035	3.23236	3.18794	3.39857	3.28953	3.32105	3.21182	3.07297	3.25332	3.18509	3.2011	3.13183	3.14876	3.10684	2.96686	2.60489	3.20348	3.06727	3.26449	3.23185	2.8789	3.36916	3.01949	3.32244
ADCY10P1	5.10802	4.77048	4.16361	4.13115	4.82943	4.47432	4.59011	4.61819	4.45439	4.53665	4.68121	4.38672	4.57746	4.60538	4.49699	4.31291	4.3033	4.31238	4.76934	4.3847	4.55399	4.42997	4.38922	4.83026	4.50493	3.25707	4.46787	4.52622	4.79972	3.4881	3.8008	4.42045	4.91954	4.78623	4.60411	4.10277	5.11655	4.97827	4.68241	4.83422	5.80562	5.14503	5.2587	4.44789	4.21894	4.3529	4.82943	4.42249	4.57009
ADCY2	4.04433	4.10849	3.89967	3.98606	3.98324	3.83531	3.81946	3.63237	3.78399	3.95795	4.13151	4.13818	4.10235	3.94781	3.96156	3.9491	4.00594	4.0957	4.04002	4.1223	4.01082	3.904	4.04414	3.96331	4.03102	4.68181	4.17033	4.28312	3.39021	4.28144	4.02572	4.26569	4.35474	4.5214	3.95446	3.9455	3.897	4.10012	3.82189	3.85158	3.65965	4.20482	3.90418	3.94396	3.78708	3.78911	3.66346	3.45371	3.4366
ADCY3	5.02497	5.58029	5.4183	6.04691	5.22837	6.14278	5.54711	5.23326	5.46652	5.72477	5.60317	5.58155	5.54368	5.53119	5.60568	5.49214	5.54923	5.59786	5.56206	5.48726	5.66058	6.27143	6.43194	5.551	5.50215	5.81248	5.52094	6.27299	5.95903	5.21782	5.48272	5.565	5.84433	5.83562	5.78241	5.58626	5.28539	6.07464	5.5265	5.63441	5.38465	5.59669	5.04461	5.47184	5.02045	5.56422	5.26364	5.53323	5.3548
ADCY4	7.74696	8.12424	7.73957	7.74555	6.58787	7.0732	7.41665	7.95404	7.33848	7.4742	7.44778	7.56296	7.46339	7.47658	7.51355	7.46459	7.45722	7.67911	7.53463	7.79338	7.63952	7.76817	7.64927	7.48005	7.39169	8.44012	7.83604	6.69496	6.3912	8.36894	7.95639	7.19992	6.70773	8.53402	7.24658	7.8655	7.81179	7.64927	7.37164	7.91183	7.12694	7.62931	7.07564	7.86056	7.27144	7.97762	7.52035	7.86788	7.90424
ADCY5	5.43763	5.59412	5.315	5.82054	5.49139	5.99022	5.65938	6.03515	5.68668	5.58252	5.46823	5.49339	5.5077	5.44889	5.57261	5.62707	5.62044	5.54633	5.58802	5.70284	5.58374	5.72183	5.7619	5.60419	5.53687	6.12409	5.81272	5.07232	5.29966	5.7474	5.72407	5.52364	5.28697	5.84953	5.84871	5.54016	5.94305	5.04523	4.84941	5.57432	5.4997	5.34705	5.78601	5.84203	5.90706	5.39138	5.39693	5.7331	5.93897
ADCY6	7.6987	6.82789	8.00232	7.84336	8.47929	7.74846	7.80023	8.32497	7.80324	7.96568	8.19373	7.73957	7.86474	7.78336	7.93892	7.85255	7.94808	7.55874	7.78696	7.81395	7.78001	8.01467	7.93204	7.83972	7.74093	6.72064	7.81395	7.21917	6.88824	7.88799	8.23989	7.50342	8.12852	8.45046	7.92237	7.98317	8.01966	7.80547	8.00955	7.94421	7.58448	7.58012	8.07303	8.08683	6.77583	7.98609	7.75606	7.88641	7.83675
ADCY7	5.17984	4.67776	4.26378	5.80201	5.33917	5.48248	5.32205	4.73846	5.28043	5.32345	5.39762	5.17984	5.28675	5.26045	5.25145	5.25692	5.18862	5.28182	5.42558	5.15359	5.31451	4.86249	4.82101	5.23501	5.21629	5.20736	5.02088	6.04386	6.17912	5.11598	4.77941	4.95579	4.5317	5.32367	5.48014	4.6527	4.62458	5.88387	5.14439	5.21331	5.01605	5.32664	4.75328	5.28878	5.52147	5.05189	4.80578	5.18111	4.88148
ADCY8	3.50921	4.38091	3.55902	3.35196	3.57034	3.98639	3.75078	3.74554	3.68246	3.50439	3.62356	3.7597	3.7261	3.52475	3.60336	3.70528	3.75948	3.66064	3.66718	4.02914	3.78158	3.7193	3.51803	3.92989	3.48073	3.79658	3.4787	3.88601	4.42895	3.37715	3.65286	4.26115	2.99223	3.56633	3.47275	3.07113	3.08684	3.58958	3.5253	4.08757	3.87803	4.38751	3.66487	3.85478	4.03621	3.99363	3.55512	4.28125	4.31734
ADCY9	5.38659	6.05356	6.02561	6.1504	5.71365	5.67149	5.72525	6.08964	5.63567	5.61133	5.73572	5.94333	5.7809	5.71365	5.73486	5.89474	5.75552	5.89341	5.81248	6.02856	5.83163	5.9106	5.86499	5.91389	5.73123	6.09599	5.9673	6.08788	6.0563	5.73258	5.91794	6.55542	5.61355	6.04416	5.2902	5.65447	5.65649	5.8437	5.71308	5.38465	5.53664	5.64618	5.6834	5.81356	6.01443	5.55905	5.73619	5.78922	6.63049
ADCYAP1	3.3502	4.08863	3.67093	4.17992	3.29831	3.21849	3.78376	3.46662	3.46706	4.22841	3.35845	4.17369	4.57349	3.5253	3.44805	3.46211	3.74418	3.3683	3.49747	3.24218	3.40285	4.02857	3.85326	3.33418	3.57986	3.42636	2.98318	4.90985	3.59721	4.05808	3.2361	4.30197	4.691	3.4429	3.46424	3.62501	3.48654	4.45402	3.42154	3.30305	3.57496	4.25579	3.22384	4.38564	2.86377	4.06511	3.38349	3.92158	3.27054
ADCYAP1R1	4.26843	4.52081	3.93448	4.00193	3.96156	4.41227	4.16495	4.37565	4.30558	4.18855	4.0988	3.94761	3.98088	4.05357	4.11309	4.15234	4.11491	4.15916	4.15212	4.26362	4.21857	4.52527	4.60131	4.15234	4.18987	4.18781	4.44138	3.91262	4.5828	4.22321	3.97862	3.97877	3.95758	4.26469	4.08321	4.19947	4.6299	4.05917	3.8313	4.36972	4.07777	3.88389	3.56882	4.37213	3.99069	4.75714	4.42167	4.453	4.12073
ADD1	6.79929	7.78897	7.14865	7.58504	6.98365	7.59508	7.26643	7.58448	7.35559	7.27043	7.2961	7.39743	7.26643	7.34249	7.3795	7.45664	7.43755	7.34463	7.25476	7.59064	7.32927	7.4971	7.32763	7.21248	7.33373	7.28901	7.61662	7.14526	7.15166	7.60331	7.76948	7.27702	7.50166	7.6064	7.81911	7.63764	7.77281	7.18027	7.35066	7.24926	6.82829	6.77298	7.03089	7.10422	6.61484	7.33476	7.23184	7.49517	7.8655
ADD2	4.3031	4.50473	4.4641	3.8897	4.23064	4.09681	4.28274	4.3501	4.22893	4.17486	4.10103	4.18465	4.0807	4.10214	4.13005	4.14637	4.12169	4.15823	4.191	4.36291	4.1854	4.36886	4.42167	4.19789	4.12514	4.85083	4.04056	4.29953	3.48482	4.33831	4.00907	4.51413	4.08373	4.32182	4.23252	4.04284	4.09993	4.34694	4.26735	4.30922	4.28331	4.41165	3.97533	4.34657	3.74439	4.13134	4.15731	4.25996	4.34336
ADD3	9.36025	9.30428	9.97951	9.75513	9.45689	10.0132	9.81991	10.2017	9.99699	9.85624	9.64214	9.67551	9.63704	9.81086	9.80506	9.79577	9.79296	9.82916	9.96989	9.32144	9.9005	9.44512	8.78299	9.63967	9.82631	7.75254	9.52261	10.0168	10.1981	8.78869	9.30428	8.96116	9.63967	8.9804	10.2741	9.39852	9.80187	10.418	9.9599	9.82305	9.81645	9.86815	9.5416	9.68414	10.1735	9.82305	9.96345	10.0168	10.0669
ADD3-AS1	4.04639	3.85884	4.22221	3.68639	3.95678	3.71465	3.87017	3.82603	3.78297	4.14562	3.83774	3.87077	3.88468	3.85712	3.87037	3.86879	3.85326	3.86935	3.83893	3.82451	3.73107	3.95462	4.01986	3.8845	3.77873	4.20924	3.84055	4.35833	4.05454	3.71428	4.29786	3.67956	3.31094	3.98807	3.74514	4.10737	3.7224	3.84263	3.6847	3.99663	3.28014	3.90474	4.08393	4.2758	4.53908	4.1219	3.80886	4.11154	3.70932
ADGB	2.44488	2.81889	2.64289	2.91873	2.84931	2.71147	2.73681	2.76229	2.62325	2.66346	2.68057	2.74826	2.71578	2.62839	2.65869	2.75252	2.6151	2.66929	2.66051	2.62598	2.72551	2.67891	2.51776	2.68557	2.71851	3.01896	2.82749	3.23725	2.82595	2.75555	2.68639	2.67094	2.62511	2.84085	2.81524	2.56837	2.21423	2.63975	2.47411	3.01715	2.75665	2.8243	2.73427	2.99668	3.15204	2.77703	2.61328	2.37913	2.73568
ADH1A	3.67681	4.63335	3.8567	4.36905	3.31947	4.94088	4.20463	5.28021	3.98105	3.98212	4.13679	4.18182	3.90813	4.25399	4.28295	4.18558	4.41419	4.20904	4.40997	4.17874	4.51949	3.68228	3.81354	4.05357	4.32991	3.73047	4.36737	4.13929	4.49231	2.64558	2.99947	3.56968	4.71369	4.06753	4.17352	4.43053	4.6546	4.73176	4.81997	4.82903	4.21956	4.37265	4.29884	3.6469	3.41058	4.62615	4.61725	4.19827	4.13625
ADH1B	5.67524	7.93054	6.57683	6.99644	6.74262	8.16299	7.16084	6.6272	7.02164	6.92148	7.31868	6.85329	6.51479	7.21703	7.53224	7.26692	7.48315	7.08824	7.22863	6.5562	7.48564	6.92418	7.22466	7.29944	7.32763	7.07269	7.70288	6.82174	7.94808	4.67519	5.97167	6.28006	7.47658	6.96484	7.57583	7.85486	7.78001	7.27533	7.40806	7.41898	6.96924	7.30284	5.89066	6.81032	6.26423	7.68773	7.50457	7.12373	6.83875
ADH1C	4.10256	4.97827	3.97718	5.2699	4.33411	6.10623	4.7184	4.69457	4.61061	4.86524	5.25166	4.98294	4.77823	5.39095	5.45983	4.86502	5.4635	4.97517	5.3387	4.37881	5.38081	5.03656	5.37648	5.19827	5.36465	5.28159	5.55466	5.551	5.76139	3.54699	3.6627	4.24381	4.95255	4.24625	5.05338	5.93279	5.47573	5.39028	4.37398	5.85822	4.38903	5.08622	3.74871	5.38506	4.7102	5.52433	5.09525	5.05144	4.62241
ADH4	3.38281	3.75654	3.4647	3.62764	3.43421	3.26353	3.34324	3.18848	3.21596	3.54078	3.39527	3.39458	3.41913	3.4133	3.51578	3.44805	3.47497	3.32174	3.35083	3.3346	3.35706	3.71705	3.68449	3.58837	3.39232	3.60313	3.20836	3.52513	3.72283	3.56135	3.22081	3.62624	3.83205	3.64091	3.47847	3.42178	3.39612	3.87635	3.32197	3.4476	3.55488	3.76292	3.40489	3.32735	3.08319	3.5019	3.42478	3.58115	3.43928
ADH5	9.15218	9.40283	10.1893	8.59661	8.84848	9.37794	9.49433	9.70386	9.49433	9.28587	9.34356	9.1319	9.26903	9.32144	9.31915	9.29583	9.41189	9.25868	9.29836	9.2111	9.39386	9.05685	8.86335	9.32791	9.41614	7.91919	8.94217	9.35186	9.55077	8.85143	8.47698	8.67335	8.42522	9.05685	9.34127	9.33677	9.41429	9.57037	8.96286	9.52261	9.63447	9.57037	8.99447	9.61329	9.71523	9.75513	9.96654	9.60394	9.13682
ADH6	3.29117	3.29097	3.68829	2.90772	3.44229	3.29304	3.30849	3.78461	3.28806	3.41398	3.20648	3.29348	3.21799	3.1969	3.26615	3.28689	3.19994	3.19215	3.20207	3.41177	3.13209	3.16032	3.26903	3.35596	3.25448	3.08549	3.20255	2.78479	3.42681	3.61942	3.43245	3.31846	3.08864	3.14574	3.14905	3.56403	3.02511	3.25091	3.48547	2.99304	3.99591	3.17415	3.45964	3.06651	3.1761	3.26378	3.42791	3.76556	3.41422
ADH7	3.79859	3.75095	3.21076	3.69816	3.65579	3.34875	3.49998	3.38325	3.56096	3.50857	3.32823	3.47209	3.42456	3.619	3.62128	3.59306	3.68864	3.54421	3.54139	3.41153	3.3425	3.47584	3.60831	3.62624	3.59395	4.38452	3.84786	3.75078	3.59905	4.19215	3.37515	3.72261	3.61512	3.83186	3.51409	3.60597	3.76657	3.77413	3.37381	3.62069	3.38471	3.46509	3.24447	3.6467	3.82382	3.47069	3.15526	3.57325	3.09141
ADHFE1	7.94656	7.37387	8.86601	8.08328	7.64727	7.41034	8.01542	8.67335	7.9595	7.90883	7.90961	7.55196	7.71086	8.04575	7.81701	7.92014	7.82926	7.71569	7.92393	7.92315	7.91697	7.83751	7.6637	7.85922	7.71512	7.61479	7.74555	6.55701	7.10468	8.33678	8.12151	7.3993	7.1951	8.42522	8.3741	8.19118	7.8978	7.27905	7.66875	8.5134	7.97831	7.93508	7.84057	7.90808	8.30447	8.31608	8.44216	8.05165	7.74417
ADI1	8.71791	7.97613	8.77356	9.11067	9.22111	8.36495	8.87983	8.69644	8.8889	8.79864	8.62576	8.66321	8.81525	8.73871	8.64106	8.64349	8.5928	8.55307	8.68035	8.71073	8.65463	8.66669	8.66669	8.91491	8.59661	8.7306	9.05349	9.29191	8.82944	8.72811	8.40172	8.73205	8.53402	8.58295	8.8889	9.05039	8.73335	8.94377	9.02771	8.58533	8.88404	8.28344	8.86193	8.27744	8.42347	8.26751	8.70185	8.12675	8.21687
ADIG	4.72783	4.74529	4.75855	4.39997	4.47036	3.98175	4.53223	4.38524	4.42758	4.51896	4.39315	4.5324	4.48349	4.4153	4.47995	4.46429	4.48592	4.41613	4.40346	4.60499	4.47858	4.26716	4.41705	4.30671	4.46823	4.93615	4.33506	4.18522	4.18124	4.48274	4.7184	4.87021	4.57272	5.34105	4.40997	4.25725	4.37842	4.49099	4.41185	4.21875	4.41647	4.453	5.06394	4.13267	4.38826	3.755	4.24574	4.62383	4.83086
ADIPOQ	4.34188	5.94988	3.6881	8.6223	8.43641	10.4344	7.84134	8.43345	7.53817	6.96567	8.22847	6.7931	5.64293	7.73127	8.34168	5.0614	8.50769	5.14307	7.67911	6.76301	7.75883	7.92393	8.3259	4.71208	7.80175	7.9595	6.84168	8.54618	8.51444	6.8562	7.20898	3.4373	9.02057	8.99269	8.7004	9.10168	7.91466	6.57861	7.32316	9.20706	1.92926	9.50105	4.19848	8.25603	4.19569	9.56788	6.12131	8.7041	4.5214
ADIPOR1	9.02238	9.00549	8.18757	8.42916	8.69369	8.39016	8.48262	8.92763	8.69644	8.64834	8.83402	8.91023	8.80527	8.76933	8.78568	8.86483	8.79459	8.83402	8.86028	9.05685	8.73477	8.64106	8.22493	8.43772	8.78299	6.66823	7.79034	8.53766	8.45383	8.13709	8.65213	9.15218	8.94217	7.43537	8.72811	8.75154	8.56393	8.90475	9.79577	8.80803	8.69644	8.43011	9.1481	8.41692	9.00252	8.5437	8.55417	9.0358	9.19714
ADIPOR2	7.67572	8.00456	7.89618	8.48725	8.34168	9.13386	8.28746	8.93617	8.22847	8.36998	8.5628	8.02195	8.29536	8.23891	8.63445	8.18757	8.69914	8.09787	8.24754	8.33463	8.42092	8.3596	8.62856	8.01121	8.25531	8.10673	7.96259	8.00955	8.16214	8.12151	8.12764	8.32098	8.78159	8.31909	8.3975	9.03895	8.85713	8.19454	8.18848	8.34644	7.68046	8.59777	7.67844	7.97349	7.41783	8.59387	7.93508	8.04575	7.9931
ADIRF	9.50105	9.32791	8.95308	9.23662	9.06191	11.0612	9.72106	10.6415	9.51054	9.47489	10.1941	9.59867	9.26043	9.51764	9.79296	8.9014	10.0303	9.41429	9.21713	9.26694	9.85913	10.2182	10.6542	9.24862	9.61092	10.9107	9.83846	9.8414	9.92821	9.74978	9.0855	8.50897	9.87179	10.1661	9.48709	9.74419	9.56308	9.4359	9.07544	10.0819	8.79299	10.2871	8.45164	10.0244	8.47593	10.6542	8.84248	9.68708	9.04502
ADIRF-AS1	4.83541	5.7619	5.30863	4.37624	4.8829	4.70279	4.82513	4.60211	4.81791	5.02228	4.87915	5.12289	4.837	4.79738	4.82158	4.98048	4.83288	4.81322	4.86396	5.11899	4.90044	4.98594	4.81979	4.88211	5.06222	5.84461	5.14524	4.43765	4.13382	4.78542	5.5645	4.13326	5.33288	5.41314	5.27082	5.09781	5.3286	4.49304	4.48313	4.89073	5.10473	4.95089	5.1395	4.14446	4.60538	4.80696	4.97791	4.90174	4.92261
ADK	6.51084	5.89395	6.75537	5.51239	5.95784	6.41229	6.38134	6.69496	6.47261	6.28961	6.16051	6.03692	6.30082	6.12832	6.11152	6.05599	6.14911	6.31137	6.38399	6.03781	6.0516	5.63616	5.80224	6.50484	6.2245	5.73672	5.90138	5.44293	6.25102	5.37114	5.76533	5.74715	5.47596	5.34778	5.88387	6.49438	6.04445	5.96755	6.0337	6.47853	7.02207	6.29313	6.49328	6.76668	7.09583	6.20013	6.60304	5.92884	4.7964
ADM	9.49186	8.99269	7.84649	9.53058	11.077	10.8361	9.83846	9.56788	9.21305	9.91627	9.89034	9.40505	9.72426	9.70386	9.63447	9.48709	9.92259	9.36908	9.45689	9.67234	9.74734	9.22111	8.97583	9.65047	9.40283	8.80803	10.3798	8.7763	10.401	8.47698	9.79011	9.92821	11.3979	9.10168	10.1488	9.00549	10.7718	8.41905	10.0408	9.24656	10.4294	9.02057	10.5304	8.31998	9.79892	8.67055	11.2854	8.81837	10.9248
ADM2	5.64722	7.0385	5.74054	5.5275	5.92296	5.93427	5.93371	6.1973	5.93312	5.73153	6.05899	6.15834	6.0636	5.8091	5.96133	5.99666	5.9527	5.96302	5.92016	6.31004	5.81738	5.5275	5.54997	5.9678	5.88274	6.80754	5.82197	6.36729	5.35268	6.46629	6.51774	6.28961	5.7323	6.03339	5.02815	5.86166	5.84399	6.05688	6.22807	5.6236	5.42108	5.81845	6.41337	6.03898	5.86301	5.87157	5.69883	5.80562	6.36111
ADM5	4.67813	6.02773	4.50883	4.8488	4.71085	4.41146	4.81772	4.82235	4.77028	4.66007	4.83614	4.99104	4.83044	4.92299	4.84978	4.90347	4.9092	4.87988	4.8384	5.04315	4.8629	4.64265	4.51393	4.87057	4.92078	5.98805	4.64069	4.4532	4.16198	5.31451	5.34125	4.9746	4.21722	4.48725	4.37247	4.93326	5.10845	4.74613	4.66357	5.23417	4.30575	4.97357	4.14212	5.5865	4.55043	5.14981	4.64921	5.43816	5.10802
ADNP	7.65384	6.64446	7.10054	7.58139	7.82642	7.22811	7.51534	7.97026	7.38834	7.46818	7.38424	7.45127	7.29	7.43237	7.47176	7.48505	7.47116	7.3566	7.21146	7.35444	7.28781	7.31403	6.93856	7.33848	7.30786	6.65194	7.04105	8.74596	7.91612	7.00335	7.05644	7.15445	7.44055	7.65783	7.26839	6.97241	7.12994	7.56869	6.74738	7.51355	7.46818	7.13467	6.83835	7.50342	7.21447	7.38303	7.42004	7.16691	7.76883
ADNP2	7.64321	7.46818	6.932	6.79353	7.71685	6.82012	7.36533	7.20335	7.20229	7.05879	7.18707	7.18707	7.25177	7.19462	7.27702	7.30633	7.28274	7.2858	7.2617	7.27855	7.25379	7.09583	7.05177	7.10512	7.15932	7.04425	6.82336	6.40613	6.68108	6.96187	6.88053	8.39219	7.98995	7.76368	7.17169	7.20955	7.03482	7.13956	7.04598	7.04289	6.97194	7.19829	7.58207	7.35234	7.29268	7.09714	7.08779	7.1028	6.94947
ADO	8.18848	7.79107	8.1189	7.75407	8.42092	6.82829	8.1381	7.45439	8.15965	8.06369	7.71635	7.65783	7.77012	7.8708	7.92315	7.95713	7.83075	7.91121	7.9358	7.68046	7.9931	7.7137	7.65107	8.03353	7.98995	7.79819	7.45978	8.66574	8.31114	7.48992	7.49994	8.08598	8.16299	7.70427	7.64321	7.77505	7.75606	7.9126	7.58681	7.69669	8.45487	7.31353	7.64529	7.52589	7.84336	7.83383	8.13882	7.14215	7.12463
ADORA1	5.96332	5.5404	5.3286	5.86525	5.72003	6.16961	6.14726	6.32751	6.03166	5.42735	5.70306	5.75745	5.72407	5.44793	5.59219	5.71776	5.74763	5.61645	5.59167	5.91964	5.68892	5.98805	5.97887	5.93395	5.67026	6.23716	5.69932	5.34349	5.18702	6.18348	6.1913	6.18318	5.49062	6.28102	5.27744	5.73572	5.72284	5.33987	5.87403	5.5588	5.51789	5.73042	5.83403	6.00908	5.49857	6.115	5.79841	6.53663	6.24941
ADORA2A-AS1	4.2529	4.36056	3.95296	3.38117	4.3031	4.21818	4.00338	4.09379	3.96975	3.85573	4.02115	4.06631	4.08829	4.03232	4.1003	4.18008	4.13208	4.13659	4.03155	4.23084	4.01633	3.97825	3.88044	4.05882	3.97933	3.94588	4.98636	4.0894	4.47225	3.75282	4.59914	3.73248	4.20158	3.82566	4.25633	4.07414	4.18781	3.08733	4.12514	3.45264	4.25069	3.72728	4.0736	4.03064	5.10408	3.81593	4.26302	3.4072	4.23767
ADORA2B	4.05681	3.73325	5.53708	4.26489	4.1374	4.08716	4.13151	4.2853	4.31031	4.27092	4.23368	4.51153	4.29078	4.39315	4.10663	4.34045	4.29748	4.40154	4.43393	4.42592	4.34885	4.30274	3.99133	4.02039	3.92828	4.85042	4.19423	4.41954	3.77535	4.32399	5.03946	4.60754	4.13151	4.94482	3.92592	4.48744	4.24857	4.52711	4.61138	4.51551	3.95904	4.13208	3.68569	4.15877	4.59895	3.63069	3.64218	4.02003	4.099
ADORA3	3.78865	5.22462	3.90169	4.1977	4.70537	4.63075	4.3316	3.90756	4.24948	4.35514	4.39866	4.50515	4.47617	4.26876	4.34545	4.69081	4.53962	4.57188	4.63539	4.4246	4.45458	4.53474	5.11743	4.33086	4.36681	3.91845	5.01605	4.30197	5.16136	3.84319	4.19967	4.20199	4.71726	3.89682	4.82334	4.34169	5.0221	4.89091	5.33848	3.91587	4.74339	4.42681	4.52122	3.58837	4.09535	4.10663	4.33851	3.87151	4.1793
ADPGK	5.60397	5.55345	5.7006	6.21746	5.20259	6.09838	5.76115	5.94333	5.80511	5.96133	6.09869	5.7577	5.91002	6.02014	5.83867	5.86087	5.87575	5.86301	5.88506	5.79974	5.93344	5.82608	5.73827	5.69125	5.80773	4.63312	5.6382	5.97034	6.18259	5.08397	5.50479	5.33245	5.79755	5.03656	6.26221	5.80146	6.23095	6.2804	6.26602	6.29702	5.89092	6.05217	5.804	5.5588	5.93632	5.86971	5.8899	6.23003	5.11598
ADPRH	4.07883	4.1791	3.99753	5.03254	4.55955	5.04014	4.46448	4.53428	4.48611	4.54108	4.6527	4.63484	4.68324	4.63133	4.61725	4.61895	4.63811	4.63449	4.56629	4.65371	4.46997	4.62895	4.35605	4.44327	4.49511	3.83733	4.61998	4.55282	4.21914	4.39467	4.74158	4.24625	4.3261	3.80223	4.45261	5.08685	5.70181	4.65151	4.58495	5.11855	4.35455	4.76594	4.30458	4.23009	4.25499	4.49909	4.34545	4.31979	4.73176
ADPRHL1	7.90732	8.03766	8.4451	9.07544	8.21044	9.07023	8.53517	8.05339	8.53882	8.49403	8.54116	8.66778	8.31909	8.51023	8.41692	8.66669	8.5903	8.69369	8.30235	8.94702	8.6471	8.6471	8.55657	8.74465	8.75016	8.20953	8.6777	7.06653	7.76162	8.58654	8.87352	8.06735	7.90732	9.20097	8.79147	8.61373	8.61241	7.51667	8.13624	8.8355	8.44723	8.25982	8.79459	8.25892	8.23684	8.11641	8.65213	8.86335	9.30236
ADPRHL2	7.2617	6.89174	7.66235	7.67399	6.90043	7.68582	7.3288	8.13032	7.36189	7.28061	7.37276	7.40099	7.31191	7.32819	7.42235	7.39058	7.42063	7.37101	7.28169	7.52391	7.32819	7.48005	7.66595	7.32143	7.26469	8.4658	7.63825	7.52275	7.27533	7.90501	7.55349	6.97194	6.87921	7.57957	7.58139	7.40154	7.25736	7.34186	7.449	7.42401	7.18077	7.48815	7.45722	7.52857	6.78203	7.21301	7.21008	7.1527	7.19462
ADPRM	5.75097	4.70297	5.7011	5.82029	5.28539	5.36129	5.45938	5.21173	5.39933	5.48433	5.57859	5.40834	5.49317	5.46123	5.44717	5.37305	5.48653	5.4434	5.43595	5.47762	5.52121	5.53591	5.92016	5.48339	5.41447	5.11041	5.2999	5.24886	5.43763	5.61229	5.10533	4.74463	4.55914	5.282	5.98054	5.46606	5.61874	5.46916	5.35872	5.06737	5.19827	5.78165	5.64191	5.62561	5.87189	5.33629	5.35045	5.28043	4.856
ADRA1A	3.47477	3.39437	4.16513	3.39658	3.32456	3.3856	3.36218	3.41982	3.35659	3.44824	3.67956	3.4634	3.4237	3.49527	3.51073	3.51098	3.54571	3.55736	3.5354	3.58473	3.49895	3.44691	3.45602	3.376	3.56135	3.5779	3.52936	2.97065	3.05419	3.56464	3.81762	3.84283	3.50396	3.57077	2.98106	3.85478	3.59884	3.37495	3.72946	3.69548	3.12167	3.52807	3.57014	3.31113	3.28481	3.7686	3.5898	3.69511	3.77836
ADRA1B	3.22784	2.87034	3.49251	3.39393	3.27829	3.12246	3.27268	4.00554	3.09511	2.89883	3.12268	3.04713	3.11523	3.19969	3.1448	3.13484	3.15329	3.21665	3.23535	3.19049	3.2407	3.25141	2.82948	3.15843	3.10872	3.02199	2.80863	2.94712	3.10604	3.03645	3.82659	3.27431	2.45931	3.27294	2.78846	3.11816	2.82136	3.23406	3.32505	3.52916	3.60518	3.44669	3.32823	3.90147	3.16306	3.24683	3.79332	3.36573	3.52851
ADRA1D	3.5019	3.8115	3.86685	3.55941	3.57583	3.52019	3.63767	3.66405	3.47255	3.59658	3.69047	3.73107	3.69351	3.56364	3.58407	3.58958	3.65923	3.59477	3.58539	3.75404	3.52995	3.90474	3.74633	3.37006	3.72884	3.84225	3.24241	3.39393	3.27315	3.9308	3.87765	3.49677	3.46447	3.24241	3.42154	3.6443	3.89646	3.73815	3.70591	3.75117	3.80013	3.25041	3.84089	3.55902	3.38953	3.85067	3.48744	4.13437	4.3155
ADRA2A	5.86226	4.3877	3.94874	5.09544	4.35885	5.48887	4.94482	5.19675	4.93908	4.3732	5.36782	5.03025	4.13592	5.08871	5.18633	4.79081	5.62984	4.8042	4.82079	4.27908	5.13542	4.98272	4.66824	4.50199	4.93737	4.58934	4.02627	5.10935	4.97537	4.3398	3.6957	4.19906	5.13805	4.90779	4.69987	5.17529	4.63397	5.16984	4.3877	5.82706	4.33488	6.81385	4.44291	5.4977	4.78125	5.94362	5.03881	4.90271	4.06489
ADRA2B	5.07649	5.89845	5.53119	4.44541	5.33738	4.78603	5.09273	5.50551	5.02796	4.87214	5.06322	5.17043	5.1875	5.14146	5.0976	5.15847	5.25046	5.10996	5.10226	5.25341	5.09544	4.81243	4.80794	5.06303	5.22338	5.02248	5.09484	4.45439	4.96228	6.06304	5.26431	5.08995	4.38011	5.47497	5.00755	5.08832	4.05037	4.82079	5.53023	5.01474	4.70902	5.3184	5.09317	5.53901	5.05615	5.03635	5.21608	4.9045	5.93395
ADRA2C	5.70037	6.58938	6.20321	5.40101	5.7011	5.37378	5.64321	5.78736	5.59246	5.57458	5.58855	5.92637	5.82766	5.55857	5.6497	5.68821	5.74868	5.83456	5.57331	6.08122	5.69365	6.16423	6.16603	5.81712	5.67497	6.3352	5.65195	5.27552	5.64693	6.59263	5.80247	6.15131	5.53074	6.02999	5.57072	5.71392	5.70729	5.91411	6.19892	5.65624	5.46285	5.12001	5.24119	5.89116	5.131	5.87189	5.59917	6.68775	6.34679
ADRB1	6.58833	6.53447	6.57305	5.36239	6.80511	6.65765	6.41681	6.59453	6.41646	6.24279	6.17721	6.20937	6.2347	6.44465	6.41714	6.50596	6.70773	6.11902	6.20232	6.52311	6.383	6.31004	6.02907	6.23307	6.21246	6.45567	6.72264	5.63243	6.14787	5.55687	5.81868	5.84203	6.29187	6.90365	6.06928	5.81044	6.72556	5.40287	5.55024	6.33644	6.38918	6.09986	6.3044	6.64525	7.06429	6.64854	7.14865	6.54258	6.78817
ADRB2	7.1351	6.70928	5.86688	5.72454	6.73312	6.5535	6.56794	6.86861	6.44812	6.46771	6.44924	6.48064	5.77858	6.52515	6.56266	6.61287	6.6889	6.30477	6.37516	6.56376	6.63709	6.32392	6.226	6.52918	6.44497	6.12863	6.53736	6.59895	7.81474	5.6223	4.98636	5.38659	6.20635	6.13295	6.16661	6.61448	6.46271	6.39017	5.94305	6.99243	6.71788	6.96656	6.0873	6.49357	6.77135	6.64151	7.04755	6.31809	6.96103
ADRB3	3.90268	4.15099	4.07846	3.60355	4.00009	4.59446	4.12604	4.0122	4.00613	4.13839	4.01541	4.06316	4.07054	3.91335	4.04284	4.0325	4.01633	3.96542	3.93958	3.99531	3.9886	4.17132	4.23546	4.19273	4.09033	4.49492	3.95165	4.18931	4.10196	4.7229	4.16532	4.1559	3.791	4.42739	3.81311	4.13891	4.01809	3.80886	4.34169	3.70951	3.70819	3.81823	4.15998	4.1527	3.88658	4.19888	4.0025	4.05716	4.06734
ADRBK1	5.9068	6.52276	6.25629	5.63133	5.90973	5.84203	6.04472	6.26634	6.10046	5.83456	6.15897	6.25503	6.09133	6.04691	6.01737	6.06956	6.1017	6.04604	6.05931	6.26784	6.10464	5.90737	5.98888	5.94041	6.02708	5.89603	6.09711	5.25847	5.32484	6.69074	6.03959	5.87109	5.67551	6.28485	6.2708	6.19578	6.19702	5.86301	6.51479	6.12073	6.09934	6.11095	5.93605	5.81922	5.41513	5.85979	5.70393	6.62097	6.79762
ADRBK2	5.66977	6.58635	5.137	5.53074	5.66483	5.73123	5.73408	6.22064	5.76614	5.81547	5.96832	5.41447	5.49745	5.77858	6.08581	5.7593	6.0708	5.50573	5.6962	5.54682	5.697	5.81119	6.04356	5.56726	5.60612	5.6693	5.85586	5.44579	5.81094	5.38706	5.10618	5.25847	6.44392	5.98195	6.05688	5.05912	5.41899	5.43568	5.17028	6.00041	5.75366	6.49078	5.30932	5.35966	5.36033	6.42437	5.86389	5.77962	6.13743
ADRM1	7.69189	8.11641	7.98163	8.50352	7.72021	8.29439	7.93803	8.49881	7.99971	7.87665	8.25029	8.32396	8.22299	8.00955	8.049	8.08236	8.06293	8.16471	7.94656	8.23514	8.01205	8.40273	8.47245	8.01966	7.94911	8.59661	8.19209	7.83236	8.25326	8.19118	8.50555	8.10143	8.16555	8.13624	7.99792	8.34742	8.33862	7.73468	8.15587	7.87734	8.00616	7.52732	7.77806	7.8472	7.85555	7.9673	8.04331	7.97515	8.35151
ADSL	8.6471	7.93204	9.18021	8.40371	8.24282	8.19118	8.24575	8.10238	8.1999	8.67335	8.48725	8.62856	8.49511	8.5903	8.56633	8.52706	8.59882	8.66921	8.5486	8.80273	8.51216	8.80122	8.75294	8.6496	8.55307	8.94869	8.36055	8.47813	8.49755	8.95018	8.98819	8.60107	8.16214	8.79558	8.58423	8.60383	8.27039	8.23684	8.27851	8.34534	8.23043	8.368	8.28247	8.43434	8.67624	8.38395	8.36376	8.01966	8.28448
ADSS	4.43072	3.52082	4.08321	5.05955	4.27076	4.48744	4.3033	4.16144	4.26914	4.55713	4.22251	4.11692	4.28664	4.38245	4.29615	4.28772	4.29634	4.29884	4.33523	4.00998	4.44119	4.17666	4.15823	4.37122	4.21818	3.37289	3.73524	5.47856	4.71042	3.82231	3.92233	4.42758	4.65616	3.25588	4.35138	4.63757	4.49324	4.75143	4.56379	4.63951	4.29208	4.47075	4.37881	4.18968	4.56418	4.2476	4.29355	4.18522	4.21762
ADSSL1	7.34136	7.97181	7.63418	6.93543	7.10468	7.11985	7.26839	7.10422	7.28634	7.32819	7.17222	7.3993	7.38138	7.26941	7.36634	7.40806	7.26589	7.25177	7.28216	7.51603	7.19829	7.57199	7.48992	7.36533	7.35123	7.75117	7.76948	6.151	6.9644	7.50702	7.62665	7.76094	6.85573	7.14526	7.67717	7.54275	6.99456	6.80006	7.53524	7.23023	7.27144	7.25379	7.51903	7.02077	7.17639	7.47951	7.47364	7.3164	7.69189
ADTRP	3.98175	3.45025	3.23382	3.66384	3.68289	4.4019	3.72728	3.52105	3.74222	3.67995	3.95758	3.6252	3.75734	3.59158	3.63845	3.87037	3.63547	3.92651	3.99307	3.84071	3.61336	3.79137	3.71584	3.87056	3.53781	3.50771	4.21762	4.02798	4.43825	3.34417	3.30098	3.71724	3.33809	3.22081	3.63864	3.65134	3.5283	4.49139	3.9153	3.61965	4.03267	3.44505	3.81512	3.46006	3.32735	3.26669	3.84889	4.4715	4.66477
AEBP1	9.06856	7.60143	8.23989	10.2871	9.42356	9.48479	8.97583	8.54234	8.60512	9.51298	9.45933	9.67816	9.41429	9.00414	9.52787	9.13386	9.19714	9.40058	9.12504	9.46695	9.19714	9.52014	9.4095	8.98959	9.28376	9.07023	8.08683	9.82631	8.46244	9.68993	9.09651	9.15979	9.44314	9.6264	10.0004	8.79017	8.85299	10.4562	9.48479	9.28587	8.73335	9.29382	8.7004	9.82305	7.36076	8.82395	7.55125	9.87812	9.40283
AEBP2	5.47619	4.719	5.16428	4.80209	5.51139	4.75101	5.18307	5.07409	5.16812	5.08643	4.90596	4.87133	4.97046	5.16027	5.10339	5.10717	5.04439	4.9884	5.0858	4.60872	4.91003	4.97706	4.92176	5.15984	5.0977	3.67172	4.51259	5.41493	5.37901	4.34002	4.2778	5.09504	5.0923	4.02187	4.59011	5.00343	4.93138	5.26826	5.01369	5.3901	5.38441	5.1395	4.62875	5.45827	5.41156	5.28159	5.27481	5.68444	5.17309
AEN	6.24647	6.01926	5.46699	6.08845	5.80832	5.2999	5.6221	5.71174	5.65075	5.77962	5.86863	6.08152	5.99521	5.84639	5.95756	5.91903	5.88559	5.89772	5.84822	6.12687	5.68921	5.72232	5.77109	5.86301	5.66729	6.96567	5.57432	6.42052	5.73903	5.83112	5.79502	6.92864	5.86036	5.53901	5.35942	6.2322	5.96755	5.74692	5.81738	5.47668	5.87626	6.00012	5.99521	5.73486	5.37787	5.47471	5.10078	5.83214	5.2502
AES	8.99746	10.1533	8.90322	9.82916	9.46945	9.74734	9.70686	8.15869	9.83846	9.37343	9.73866	9.73266	9.79892	9.67816	9.59867	9.69527	9.59069	9.63967	9.71239	9.629	9.46436	9.91627	9.85038	9.67816	9.63967	9.79011	10.2182	7.66947	8.70536	9.81645	9.65298	8.95454	8.75558	9.33441	9.74419	9.65298	9.60394	9.51764	9.78721	9.89034	10.1813	9.01386	9.64214	9.76389	8.48163	9.83846	9.58815	10.4562	10.583
AF001548.5	4.13078	4.56968	3.57537	4.99063	4.75736	4.39215	4.46923	4.66905	4.55895	4.42661	4.51002	4.45076	4.20463	4.01753	4.18987	4.20538	4.32075	4.32092	4.53606	4.49756	4.25793	4.83106	4.4373	4.40863	4.26093	4.18444	4.70779	4.12532	4.54129	4.05167	4.53358	3.70313	4.01828	5.19654	5.12763	4.07252	4.67282	5.37352	4.643	4.36956	4.18688	4.06297	3.90939	4.48142	4.65758	4.72412	4.63636	3.98418	4.32819
AF007147	5.19041	6.60627	5.153	5.18568	5.54784	5.2005	5.44604	4.00414	5.37858	5.51139	5.7871	5.56629	5.49534	5.39138	5.51434	5.48703	5.51162	5.40244	5.55443	5.71105	5.50479	5.86138	5.52409	5.78866	5.53943	5.70136	5.86036	5.87244	5.94472	5.5525	4.83288	5.60089	6.05326	6.22131	5.49679	5.52218	6.23783	5.18904	4.44445	5.00175	6.07436	5.63995	6.14339	5.20822	5.24141	4.97868	5.282	5.03482	5.12805
AF067845.1	2.79935	2.96444	3.34942	3.07093	3.19463	3.43421	3.14329	3.10156	3.36151	2.97203	3.08418	2.98239	3.07673	2.95168	3.03822	3.00554	3.07621	3.08218	3.09841	3.20551	3.05294	3.39635	3.19759	3.11261	3.00842	3.43027	2.89286	3.16622	3.54677	3.17684	2.81796	3.28014	2.93996	2.70246	2.73744	2.91873	2.84308	3.51146	3.32575	2.90044	3.06936	3.00054	3.42768	3.16571	3.13318	3.37314	3.27596	3.13935	2.93581
AF070581	3.22517	2.76546	3.70799	3.47339	3.10576	2.71112	3.64709	3.63743	3.47984	3.33418	3.16408	3.02511	3.24515	3.19296	3.05704	2.96062	2.87714	3.09685	3.27102	2.75873	3.14673	2.82462	2.7353	3.02804	3.15405	2.7425	2.9176	3.63992	3.67775	3.31067	3.93615	3.05346	3.12671	3.26594	2.82397	2.97648	3.06805	3.64275	3.00608	3.93726	2.67728	3.64295	2.65357	3.10684	3.376	3.68628	3.41667	3.11331	2.75836
AF086184	3.48482	3.98733	3.1988	4.21324	3.92751	3.70057	3.47453	3.32015	3.62356	3.8491	3.7261	3.74119	3.81332	3.65434	3.64237	3.72199	3.79332	3.68051	3.83002	3.74355	3.79117	3.82603	3.91508	3.73423	3.68246	4.25379	3.61649	4.35415	3.25448	3.97082	3.96899	3.65516	4.012	3.45264	4.16015	3.92751	3.52807	3.75673	3.74102	3.57892	2.81394	3.89794	3.99571	3.42001	3.70469	3.74829	3.40061	3.84165	3.78618
AF090939	3.24923	3.32363	3.77155	3.29664	3.50108	3.75597	3.94818	3.55169	3.33278	3.53328	3.28437	3.35338	3.89589	3.41889	3.50086	3.33602	3.47036	3.44919	3.40921	3.57164	3.35262	3.2837	2.77952	3.3858	3.31135	2.94337	3.38429	3.61476	3.60018	3.29996	3.49998	3.78179	5.81868	3.61134	3.26378	3.4908	3.48337	3.5374	3.00469	3.45559	4.00375	3.49814	3.81043	3.16718	3.45964	3.42068	3.65965	3.2819	3.06805
AF131215.4	3.1719	3.74185	3.13104	2.70849	3.27315	3.04925	3.30261	3.1803	2.89636	3.3792	2.97545	3.11331	3.00155	2.97948	3.01523	3.0243	2.99726	3.11792	3.09867	3.24195	3.39549	3.1724	3.42348	3.32779	3.59865	3.0997	2.95905	3.27456	3.48961	3.30098	3.44445	3.49395	4.10256	4.19254	3.38694	3.20086	2.98292	3.06522	3.06497	2.79641	3.41131	3.70409	3.42528	2.93131	3.13587	3.18118	3.48654	3.1031	3.35987
AF131215.8	3.02932	2.84372	3.16648	2.79108	2.90624	2.83805	2.77303	3.02269	2.95876	2.98161	2.92237	2.80618	2.82906	2.78418	2.80989	2.81889	2.8186	2.77838	2.77982	2.8943	2.84874	3.17809	3.1944	2.97948	3.016	3.20301	2.7763	2.8365	3.01102	3.04388	2.808	2.75555	2.97568	2.92292	2.42567	3.23585	2.87496	2.84901	2.94109	2.96391	3.04819	2.93407	3.1026	3.17288	3.32105	2.49537	2.9431	3.03197	2.86165
AF186192.1	4.49779	4.53128	5.24341	4.46523	4.55914	4.49362	4.65677	4.72153	4.82493	4.51335	4.49398	4.72055	4.54925	4.40822	4.45439	4.48687	4.52584	4.55079	4.48033	4.73015	4.57937	4.66667	4.54988	4.78567	4.63075	4.73804	4.32163	3.89774	4.73351	5.01779	5.67048	4.42146	4.67776	4.65349	4.73156	4.39943	4.81302	4.16568	4.50164	4.40734	5.03881	4.0076	4.87376	4.66739	4.61397	4.7256	4.59586	4.61895	4.77941
AF198444	2.693	2.87002	2.53885	2.52771	2.64726	2.86752	2.63792	2.78618	2.53386	2.47677	2.60035	2.78687	2.56837	2.55384	2.51776	2.51838	2.53158	2.71612	2.68383	2.80898	2.51559	2.65493	2.69621	2.52533	2.78618	2.57679	2.76799	2.65706	2.85051	2.42921	3.08603	2.618	2.64116	2.62462	2.44596	3.19734	2.58889	2.28204	2.69149	2.4016	2.80585	3.3776	2.839	2.76478	2.61162	2.64654	2.72439	2.76509	2.85922
AF213884.2	5.60955	5.42558	5.44987	5.24999	5.44408	6.0268	5.5635	5.34753	5.51292	5.59645	5.41513	5.51763	5.52823	5.51952	5.52121	5.62779	5.59387	5.42829	5.4038	5.76951	5.48681	5.37066	5.46195	5.58252	5.66779	5.94244	5.38576	4.76655	5.26364	6.46446	5.8403	5.95382	5.37212	6.09806	5.39116	5.323	5.49289	5.29062	5.59519	5.06562	5.37744	5.12268	5.48556	4.93784	5.29386	5.47927	5.19785	6.00182	5.97281
AF279780	3.33144	3.21953	3.33144	2.74037	2.85014	3.11041	2.99118	2.77763	3.01868	2.89751	3.06178	3.12246	3.08733	3.18383	3.1872	3.21469	3.19626	3.13982	3.08168	3.20506	3.04308	3.07472	3.07598	3.04951	2.8249	3.30487	3.39676	3.00228	2.78618	2.95542	3.11283	3.05809	3.31423	2.76021	3.38257	2.89926	2.94024	3.00947	3.19708	3.13607	3.05139	3.0974	2.64164	3.1026	3.51935	3.07621	3.17141	3.28142	4.05845
AF289551	4.78683	5.19333	4.35415	4.13818	4.49987	4.43595	4.60615	4.72838	4.1284	4.61338	4.41477	4.51077	4.49342	4.4538	4.59149	4.68101	4.47955	4.55244	4.57448	4.59463	4.49231	4.38524	4.26284	4.44642	4.63036	5.2258	4.23855	4.31639	5.25046	4.99585	4.8939	4.20795	4.05315	4.47056	4.40787	4.40211	3.89682	4.47579	5.01348	4.10256	4.0301	4.55475	4.35605	4.82532	4.36614	4.31905	4.63172	5.32947	5.12978
AF520793	4.05936	4.56571	4.85248	3.31403	4.82662	3.78257	4.66313	4.24102	4.46117	4.17279	3.71543	4.00009	3.99697	4.34002	4.37585	4.38052	4.33327	4.25871	4.42212	3.43071	4.11914	3.47317	3.41798	4.52711	4.49568	3.50552	3.41642	5.00131	4.44843	3.68547	3.56155	4.18215	6.01709	4.49819	3.64915	3.21517	3.62356	4.38547	3.23805	4.11655	4.87698	4.48725	4.21818	4.27651	4.36594	4.19254	4.51475	3.73268	4.37935
AFAP1	3.95256	3.09713	3.08218	4.01986	4.8327	3.74554	4.02499	3.8858	4.1431	3.79579	3.73107	3.92691	3.86287	3.59177	3.83609	3.66637	3.6861	3.89167	3.8843	3.75597	3.63275	2.839	2.73969	3.96542	3.87307	3.44445	3.20328	5.62281	4.34412	3.61275	3.58092	3.14775	3.60375	2.91707	3.80261	3.13209	3.42502	4.27395	3.76134	3.69189	3.78497	3.94271	3.90247	4.3415	4.53888	3.31757	3.37314	3.5241	4.04094
AFAP1-AS1	3.59177	3.65175	3.9886	3.49747	4.01986	3.47209	3.71665	3.83893	3.74753	3.60883	3.61942	3.78887	3.67624	3.56549	3.54203	3.64773	3.66637	3.59842	3.66598	3.78439	3.56882	3.90289	3.89357	3.43532	3.43595	4.2459	3.80615	3.84809	3.36804	3.79776	4.06631	3.55802	3.63089	4.21177	3.75909	3.72418	3.7931	3.3769	3.84018	3.62927	3.90713	3.63787	3.66885	3.30261	3.75751	3.50241	3.67344	3.52874	3.4787
AFAP1L1	5.86357	6.12993	6.40774	6.92807	6.09245	6.52796	6.2507	5.77722	6.36667	6.48868	6.2708	6.32242	6.40334	6.39887	6.47954	6.36487	6.47748	6.49939	6.33194	6.62612	6.43159	6.51516	6.19669	6.3194	6.3718	6.20143	6.81072	5.48979	6.2163	7.25226	6.94679	5.77382	5.84461	6.27175	6.65156	6.48563	6.88053	6.05899	6.22901	6.10046	6.19865	5.70208	6.16961	6.4969	6.22748	6.52984	6.61408	6.04297	6.81152
AFAP1L2	4.60891	4.20482	4.87801	4.95901	3.76075	4.04822	4.15495	4.00516	4.39051	4.65778	4.30347	4.55114	4.42592	4.51624	4.85887	4.55419	4.64318	4.59011	4.69893	4.48782	4.43673	4.53028	4.42895	4.21611	4.58023	4.41227	4.37194	5.05993	5.08178	4.42233	4.5186	3.26978	4.1867	4.04721	4.75249	4.96773	4.27201	4.45973	4.2318	4.34261	3.30465	4.54387	4.21664	4.91238	5.14207	4.82682	4.60795	3.83569	4.10791
AFF1	6.19196	6.39188	5.78514	5.84176	6.60441	6.10524	6.30052	6.11418	6.26455	5.95353	6.03604	6.12832	6.09986	6.23066	6.18382	6.25919	6.21211	6.13937	6.11391	6.35723	6.19669	6.00041	6.13525	6.24969	6.19608	6.19418	6.02458	6.15834	5.84847	5.37969	5.52923	6.98184	7.0385	5.73773	5.74106	6.56675	6.37867	6.28006	6.51774	5.95045	5.86775	6.44812	6.20505	5.75442	5.59995	5.96946	6.03724	6.38841	6.02561
AFF2	3.7195	4.2516	3.86591	3.67624	4.14056	3.8565	3.86517	3.86685	3.97769	3.85555	3.7495	3.87822	3.80695	3.83284	3.82231	3.88368	3.86935	3.87037	3.8615	4.0065	3.83617	3.87251	3.81228	3.84809	3.83837	3.96294	3.88119	3.74141	3.15576	4.40822	4.15823	4.10864	4.03497	4.09936	3.50502	4.14001	3.81113	3.82983	4.07537	3.85252	3.91279	3.69433	4.04741	3.58115	3.90474	3.88771	3.76756	4.31275	4.26639
AFF3	4.3501	4.16127	3.43772	4.43393	4.28664	4.56968	4.24025	4.34429	4.28383	4.05583	4.16455	4.18652	4.146	4.29597	4.22446	4.21894	4.23493	4.11529	4.22841	4.31941	4.09518	4.25421	4.00907	4.14272	4.12	4.52081	3.86744	4.13891	3.94374	4.23196	4.20574	4.04265	3.75518	3.8635	3.89967	4.91023	3.91111	4.06355	3.62335	4.70239	4.24966	3.92026	3.85123	4.74026	4.79952	4.73538	4.49779	4.28862	4.15784
AFF4	4.433	4.47166	4.36474	4.47307	4.53962	4.1755	4.40269	4.38639	4.3261	4.44021	4.2358	4.35833	4.441	4.40035	4.36254	4.43595	4.36457	4.30049	4.25141	4.24782	4.26429	4.66189	4.52511	4.46787	4.33362	3.78179	4.20199	4.54524	4.20682	3.93448	4.13717	4.53296	5.32043	4.75269	4.45746	4.99812	5.30035	4.62017	4.4711	4.40562	4.16436	4.469	4.72196	4.30122	4.53924	4.28218	4.42758	3.99947	4.32512
AFG3L1P	5.64321	5.41038	4.90366	5.35156	5.21048	4.89007	5.25888	5.44911	5.29158	5.2007	5.35696	5.15966	5.30818	5.27058	5.23755	5.14802	5.21564	5.03881	5.27455	5.19155	5.26022	5.05384	5.19827	5.34824	5.30842	5.63543	5.78138	4.45239	5.26156	5.38685	5.54579	5.12563	5.26465	5.76481	5.51017	5.35849	5.29764	5.13458	5.24341	5.53098	5.26314	5.40602	5.34012	5.26969	5.38221	4.94951	4.81339	4.63449	4.72539
AFG3L2	7.47716	8.0971	8.67892	7.73192	7.76298	7.79893	8.14924	8.49632	7.97831	7.9869	7.84495	7.73736	7.79967	7.91697	7.81911	7.85327	7.83308	7.73957	7.80102	7.89182	7.68773	7.79819	7.95799	8.049	7.85408	8.65592	8.23431	7.71569	7.85017	8.31808	7.81395	8.14332	8.19722	8.79459	8.00232	7.86199	8.10058	7.28634	7.56431	7.85408	8.18228	7.78066	8.02357	7.70947	7.34687	7.78968	8.08856	7.83157	7.54737
AFM	3.47584	3.14501	3.01573	3.1523	2.52838	3.28995	3.02855	2.89666	3.08271	3.18743	3.19367	3.16434	3.18187	2.99223	3.0927	3.01212	3.08418	3.06605	3.01383	3.11571	3.26399	3.22409	3.1366	2.88505	3.22658	3.27899	3.12419	3.3136	3.48226	3.14187	2.7619	2.97788	2.6242	2.24472	3.231	3.01691	3.05539	3.26978	3.28505	3.41713	3.64954	2.77397	3.02855	3.16386	3.87654	3.30803	3.1944	3.20231	2.95978
AFMID	4.6718	5.63592	4.81753	4.53046	4.19827	4.75895	4.45113	3.76448	4.6299	4.24004	4.76254	4.84447	4.81471	4.74573	4.76013	4.88745	4.82826	4.75551	4.90249	5.23521	4.69234	4.71146	4.73561	4.52948	4.74092	5.6809	4.8384	4.00318	4.45991	5.10385	4.55114	5.35115	4.71505	5.49266	4.84401	5.20736	5.11878	4.62205	4.90193	4.64169	3.97877	4.689	4.56916	4.27163	4.33105	4.65854	4.30494	4.95114	4.80794
AFP	4.09055	4.02914	3.94666	4.48856	3.4456	4.09627	3.7307	3.62667	3.82715	4.19848	3.93804	4.14793	4.21177	3.83023	4.08792	3.99844	4.08775	4.19927	4.12862	4.14526	3.85252	3.9153	4.06489	3.90939	3.97954	4.40831	3.75771	4.25616	4.52546	4.67217	4.56837	4.30712	3.11113	3.45917	4.25647	4.1041	3.27953	4.00283	3.63378	3.89011	3.76491	3.61379	4.31605	4.07864	4.55152	4.12302	4.02536	3.81078	4.14424
AFTPH	7.3266	6.50011	6.85836	6.73192	7.00864	6.86301	7.12373	6.99593	7.03572	6.9644	7.04334	6.81307	6.89604	6.90459	6.94078	6.84011	6.84458	6.91237	7.02544	6.66003	7.08393	6.83922	6.94818	6.94031	6.92101	6.33259	6.62901	7.65581	7.53881	6.5159	6.1713	6.92418	7.00517	6.5052	6.54194	6.86944	6.65805	7.26789	6.84297	7.22664	6.97788	7.27474	6.61601	6.97241	6.56154	6.932	6.69739	7.21353	6.38531
AGA	5.28945	4.50553	6.16756	5.86301	5.13058	5.92862	5.37694	5.15655	5.56024	5.76926	5.80963	5.46606	5.37717	5.86552	5.64945	5.51411	5.59544	5.75413	5.59087	5.20431	5.60472	5.56803	5.52551	5.57661	5.54808	5.00696	5.2699	5.61623	5.62409	5.26875	5.10556	4.86165	5.0858	4.65437	5.5092	5.75047	5.86418	5.09206	4.44736	6.03166	6.12288	5.93224	5.52797	5.94472	6.4969	5.73928	5.73949	5.15569	4.63676
AGAP1	5.57168	5.6586	5.42829	5.42445	5.28675	5.13476	5.4129	5.65829	5.51637	5.47786	5.24572	5.35742	5.39481	5.33802	5.43739	5.49317	5.28629	5.42875	5.44408	5.41266	5.33288	5.63686	5.50277	5.2005	5.43716	5.61433	5.12196	6.41337	5.11618	5.64921	5.31226	6.05269	5.7385	5.1478	5.32553	5.49903	5.25521	5.80721	5.18131	5.14893	4.89272	5.37424	5.35045	5.54579	5.3572	5.29942	5.13888	5.06713	5.3657
AGAP11	3.97589	4.27708	4.92159	4.32036	4.23252	4.27505	4.22952	4.3324	4.28203	4.21158	4.46157	4.26115	4.33429	4.44999	4.4421	4.29559	4.37743	4.16605	4.23527	4.18146	4.31569	4.29862	4.06077	4.17406	4.34074	3.96331	4.36614	4.16015	4.07201	4.37801	4.1374	3.83681	4.64339	4.55992	5.04566	4.73092	4.72838	3.90289	4.26529	4.29469	3.41177	4.72233	4.22841	4.40367	4.3847	4.70046	4.49417	4.36232	3.57349
AGAP2	4.29727	4.89133	4.72435	4.18197	4.13929	4.21914	4.34002	4.73192	4.27059	4.19312	4.3572	4.42997	4.37434	4.3367	4.34639	4.32937	4.35833	4.45601	4.35605	4.58297	4.30693	4.5769	4.35358	4.40752	4.36308	5.20693	4.09553	3.92868	4.03532	4.85825	4.26931	4.50824	4.09936	4.26034	3.76175	4.36362	4.18008	4.35904	4.42146	4.26507	4.08357	4.34973	4.50607	4.37953	4.53492	4.58695	4.58434	5.10078	4.83858
AGAP2-AS1	4.5551	4.29862	4.15343	4.57349	4.26429	4.1618	4.34375	4.2803	4.38322	4.32684	4.44541	4.57392	4.42045	4.4248	4.44999	4.39541	4.4421	4.48816	4.37725	4.49646	4.32457	4.53086	4.54065	4.18505	4.41227	4.98676	4.11582	4.8272	4.02611	4.78125	4.13437	3.94968	4.08757	4.25123	4.51058	4.52333	3.96861	4.63676	4.37725	4.61418	3.78158	4.52603	4.28791	4.55557	3.8491	4.36362	3.85591	4.32365	4.71608
AGAP3	5.83265	6.2708	6.1823	5.46239	5.58776	6.1253	5.95471	5.75458	5.89283	5.73949	5.95729	6.20143	5.98347	5.79214	5.91823	5.88506	5.98676	5.9106	5.86916	6.12895	5.86138	5.84493	6.09934	5.75582	5.90571	6.37484	6.54406	5.35503	6.0179	6.35557	6.05749	5.8437	6.01049	5.63925	5.95534	6.00965	5.99548	5.58898	6.1648	5.57661	5.71879	5.70859	5.99985	5.74789	5.55974	5.63338	5.42691	5.94749	6.2229
AGAP4	3.77894	4.7964	4.91563	4.14793	4.41208	4.72581	4.70259	4.60834	4.81626	4.15398	4.36494	4.39924	4.45565	4.45439	4.53606	4.37356	4.39829	4.3529	4.24421	4.29011	4.22091	4.37953	4.43615	4.21818	4.2548	4.73476	4.97318	4.94326	4.69581	5.38174	4.74008	4.50199	5.58275	6.08092	5.38483	4.4675	4.61707	4.84686	4.19827	4.08658	4.23855	4.04094	4.50145	4.1755	4.2276	4.24025	3.95146	3.98658	4.30827
AGAP6	4.14349	4.68121	4.24361	4.55655	4.12898	4.36737	4.35979	4.23749	4.5483	4.26175	4.34449	4.41841	4.3786	4.35027	4.3501	4.34863	4.27891	4.2722	4.41613	4.46486	4.44501	4.06436	4.25725	4.35833	4.55837	3.86555	3.89396	3.84518	3.85326	4.53962	3.96119	4.07902	4.04284	4.84626	4.79952	4.6546	4.53984	4.58371	4.93558	4.90044	4.00299	4.55549	4.49789	4.25909	4.23874	4.22648	4.87093	4.49029	4.3587
AGAP9	3.6957	4.02076	4.25996	4.18505	4.70779	4.29044	4.32203	5.02815	4.14293	4.13873	4.24218	4.14961	4.28185	4.30613	4.19116	4.12302	4.28643	4.25252	4.2906	4.25793	4.17279	4.0156	3.86331	3.96714	3.904	4.61215	4.63521	4.3389	4.43903	4.2518	2.95485	4.67906	4.51002	4.04531	5.37969	3.69047	4.53924	4.23603	4.00467	4.41954	3.87494	4.43356	4.25853	4.59309	3.74418	4.26115	4.16824	4.14037	3.67052
AGBL1	3.62686	3.04414	3.20185	3.0974	3.23483	2.89195	3.39437	3.33372	3.22931	3.10791	3.06962	3.06605	3.06229	3.19367	3.20433	3.13342	3.19265	3.04576	3.07093	3.00793	2.98488	3.32694	3.35967	3.25448	3.11571	2.95371	3.45625	2.76125	2.79831	3.0058	3.21206	3.25944	3.10546	3.30717	3.46947	2.8691	3.32505	3.39232	3.34492	3.09921	3.01383	3.30972	2.91115	3.5019	2.96737	3.31445	3.19626	3.56633	3.29464
AGBL2	3.51515	2.98053	2.73681	3.11523	3.16434	2.82169	3.03944	4.46862	3.01817	2.94391	3.00744	2.97867	2.96001	3.01023	2.85397	2.84182	2.9405	2.95002	2.95225	3.03408	2.87529	2.81587	2.76125	3.08319	2.89085	2.99326	3.52475	3.50618	2.64426	2.75448	2.59472	2.84308	3.18537	2.46812	2.78335	2.92005	2.4016	3.01923	3.08319	3.23931	3.5596	3.16233	3.19321	3.14138	3.48203	3.74025	3.09998	3.4634	3.6756
AGBL3	2.91408	2.80585	2.70665	2.55071	2.95572	2.58889	2.7476	2.46217	2.76613	2.62839	2.82462	2.57568	2.67012	2.90864	2.74139	2.65706	2.70626	2.76578	2.79764	2.60035	2.69382	2.81331	2.66839	2.81331	2.79514	2.57624	3.06962	3.10438	3.50439	2.4016	2.60536	2.49746	2.9566	2.64017	3.20928	2.66971	2.51776	2.78905	2.64248	2.93608	3.11765	2.59089	2.67612	2.76229	2.94857	2.73783	3.3683	2.50986	2.44693
AGBL4	3.92458	3.85591	3.80071	3.39527	3.78158	3.46053	3.42963	3.59525	3.39699	3.77077	3.63968	3.63568	3.67681	3.66949	3.65393	3.79798	3.69065	3.6881	3.62458	3.6568	3.58115	3.95937	3.9735	3.77601	3.74025	3.75303	3.67093	3.68371	3.59951	4.36972	3.9599	4.13382	3.67583	3.57367	3.69881	3.63237	2.97592	3.69956	4.02152	3.56825	3.31286	3.68628	3.57391	3.97064	3.42722	4.02243	3.78116	3.74475	3.59996
AGBL5	5.24318	4.2722	5.28221	4.66535	5.24683	4.88829	4.83026	4.8856	4.84646	5.15486	4.97318	5.09438	5.02228	4.86683	4.97338	4.89494	5.02111	4.98382	4.90132	5.20671	4.8631	5.17461	5.13542	4.99063	4.88725	5.40997	4.9963	5.02001	4.72875	5.09975	5.74638	4.56397	4.71979	4.80462	4.95561	5.12683	4.57168	4.67238	5.42445	4.51914	4.69893	4.76671	4.82642	5.11017	5.34802	4.89494	4.74484	4.72153	5.07816
AGER	4.56245	4.5022	4.92078	4.50982	4.57231	4.16513	4.56475	4.63335	4.57631	4.3786	4.52866	4.54065	4.52476	4.55347	4.50647	4.55971	4.60131	4.56204	4.46217	4.60411	4.46448	4.6525	4.56609	4.44369	4.50861	4.92798	4.53831	3.99509	4.3568	4.89371	4.31409	4.98676	4.07379	5.00509	4.25943	4.22205	3.89259	4.48725	4.95843	4.48049	4.40443	4.43691	4.53729	4.39776	4.49492	4.84604	4.73581	4.89851	4.994
AGFG1	5.70449	5.12153	5.5712	5.00088	5.47322	5.42853	5.45847	4.74422	5.49139	5.36129	5.41038	5.2841	5.44579	5.44838	5.48794	5.43934	5.4995	5.41314	5.40177	5.23951	5.40177	5.49857	5.52774	5.36376	5.37944	4.88412	5.00109	6.0024	5.79841	4.97619	5.3788	5.66362	6.01643	5.07695	5.19482	6.11418	5.58582	5.50479	5.64845	5.27387	5.33428	5.45682	5.11942	5.27276	5.31138	5.25033	5.23369	4.82016	4.66025
AGFG2	4.40385	4.83044	4.60246	4.36991	4.33219	4.49835	4.55676	4.62593	4.59206	4.52732	4.44843	4.57786	4.51316	4.36014	4.41146	4.47718	4.44247	4.4496	4.42167	4.6112	4.39364	4.58063	4.55971	4.44386	4.46136	4.7884	4.44247	4.29975	4.24256	4.93595	5.04398	4.81791	4.37935	4.80013	4.30958	4.56204	4.31409	4.44583	4.6037	4.31693	4.27596	4.6299	4.28684	4.4109	4.16902	4.31714	4.36273	4.64169	4.64169
AGGF1	5.31819	4.27431	5.6236	5.60568	5.37581	5.26156	5.16812	4.85042	5.14185	5.3685	5.36033	5.16323	5.26314	5.45609	5.28043	5.33222	5.25961	5.43344	5.43841	4.73176	5.35295	5.22531	5.23065	5.31138	5.51344	4.28383	4.98067	5.52847	5.05662	4.88211	5.02987	4.86795	5.48482	5.01306	5.87545	5.40997	5.59246	5.45962	4.98168	5.38896	5.47471	5.34765	5.00658	5.18025	6.05995	5.0719	5.42759	4.93476	4.74441
AGK	5.81197	5.9917	6.1083	5.41945	5.5151	5.36083	5.67048	6.35495	5.66828	5.63465	5.55366	5.54897	5.56898	5.65323	5.58204	5.67652	5.60186	5.58726	5.58605	5.6834	5.51876	5.8869	5.82112	5.66483	5.60044	4.64602	5.1561	5.21629	5.32973	5.06183	5.3601	5.58128	5.51388	4.89679	5.36286	5.37671	5.42108	5.23259	5.83731	5.75721	5.98994	6.26575	6.1648	6.09133	6.27143	6.09565	6.31004	5.8689	5.50697
AGL	9.37123	9.10338	9.72426	7.47364	10.0069	9.08078	9.5416	9.8353	9.52261	9.25654	9.04849	8.33862	9.12685	9.22464	9.25868	9.26476	9.07334	9.16962	9.12685	7.95713	9.0009	8.43345	8.15776	9.24656	9.24263	8.1155	9.60855	8.67624	8.99269	8.25326	9.11943	8.95167	9.46945	8.89188	8.34846	8.12764	8.47593	8.87505	9.10338	9.5416	10.4862	9.03895	9.74419	9.20503	10.2574	8.61116	9.9005	8.94519	8.96451
AGMAT	3.3683	3.42899	3.5871	3.77836	3.42722	3.6401	3.58426	3.64815	3.54856	3.42874	3.55696	3.54101	3.47517	3.36406	3.35817	3.39458	3.3543	3.4026	3.41845	3.43265	3.47275	3.57496	3.58796	3.39811	3.52635	4.06489	3.92084	3.86919	3.39503	3.89571	3.72667	3.63884	3.57769	3.6252	3.35518	3.10604	3.40991	3.37271	3.46236	3.51715	3.55273	3.64591	3.32061	3.28974	3.41106	3.10576	3.83002	3.4581	3.08393
AGO1	6.01959	6.45531	5.90254	5.49723	5.97421	5.83776	6.00787	6.04078	5.95729	5.78219	5.81044	5.91173	5.84796	5.79477	5.93025	6.00524	5.90369	5.8666	5.85171	6.07352	5.78736	6.0708	5.92426	5.93605	5.8091	6.69382	6.2347	6.2347	5.92721	6.17941	6.08871	6.13709	5.86971	6.547	6.05995	5.74586	5.63739	5.57168	5.55974	5.45081	5.62258	5.60568	5.70678	5.89341	5.99959	5.7151	6.00213	5.60186	6.32529
AGO2	5.48361	4.67122	5.58003	5.84715	6.21094	5.62931	5.11556	5.78061	5.23868	5.34728	5.54736	5.59593	5.7144	5.38896	5.55734	5.60419	5.44864	5.67337	5.52121	5.85329	5.56952	5.80992	5.80247	5.7849	5.60905	4.8136	4.86524	5.84847	5.36239	5.6075	5.93312	6.39507	6.87447	5.03424	5.75745	5.60209	6.14278	5.69883	5.82197	5.18509	5.31291	5.543	6.26691	5.24383	5.61951	5.34705	5.52169	4.87988	5.03209
AGO3	5.31091	5.62956	4.82294	5.08974	6.17417	5.17006	5.41598	5.55366	5.3275	5.42901	5.30651	5.20156	5.31181	5.35942	5.51901	5.34684	5.31403	5.23088	5.27815	4.98483	5.34481	5.34459	5.137	5.30589	5.38465	4.22612	5.28043	5.98406	5.57432	4.61023	5.7385	5.04708	5.97665	5.79809	5.80121	5.70335	5.61253	5.53757	5.43986	5.09206	5.24183	5.5581	4.86895	5.30818	5.40883	5.422	5.42377	4.7927	4.92597
AGO4	5.38526	5.13296	4.81833	5.25888	5.02576	5.39596	5.22361	5.08888	5.09484	5.29603	5.08158	4.99376	5.11289	5.15486	5.17859	5.11497	5.09295	5.04813	5.13232	4.97847	5.12371	5.25847	5.20987	5.29182	5.13787	4.54308	5.44652	4.8758	5.20843	4.4163	4.69987	4.58203	4.81506	4.85042	5.07964	5.15069	5.42222	5.15629	5.06973	5.03843	5.21985	5.23348	5.70306	5.50623	5.49878	5.10363	5.5645	5.15173	5.45938
AGPAT1	8.76663	8.81525	8.23327	7.67648	8.88258	8.21687	8.50658	8.99746	8.67477	8.3398	8.58892	8.6065	8.50454	8.20465	8.46244	8.51216	8.32876	8.43541	8.40067	8.72685	8.32876	8.85871	8.5628	8.34447	8.45269	9.0009	8.98692	8.17422	7.89618	8.99269	8.99447	8.1902	8.105	8.56038	8.44633	8.42916	8.53157	8.49998	8.93773	8.53882	8.01883	7.95639	8.57063	8.26751	7.63896	8.29237	8.30447	8.55531	9.02771
AGPAT2	7.50578	7.48743	7.26064	7.6987	7.74021	8.88404	7.60764	7.89392	7.6192	7.57719	8.52011	7.87457	7.71437	7.78968	8.1189	7.56187	8.36894	7.55995	7.73957	7.91919	7.98838	8.01627	8.43127	7.4519	7.82207	8.049	7.42805	7.11217	7.55616	7.76094	7.698	7.54275	8.31022	8.1381	7.8518	8.05512	7.63479	7.43478	7.79405	8.2065	7.29415	8.31022	7.35188	7.74489	6.81814	9.10675	7.45248	7.92315	7.7137
AGPAT3	5.84871	6.18746	6.06783	6.22807	6.20206	6.84747	6.23127	6.61679	6.30052	6.21183	6.26455	6.22748	6.18509	6.16451	6.25192	6.29476	6.27175	6.2245	6.18318	6.32316	6.21432	6.41083	6.33123	6.09961	6.1973	6.75052	6.75492	6.04217	6.18806	6.40906	6.53979	6.15006	6.20351	6.83171	6.09192	6.0738	5.81712	5.79427	5.95933	6.00524	6.00466	5.92545	6.03339	6.05716	6.118	6.32816	6.37689	6.37451	6.56562
AGPAT4	4.56779	3.8355	4.28331	4.64981	4.69497	4.43903	4.31979	4.09608	4.32512	4.73951	4.42818	4.46923	4.49568	4.44404	4.44058	4.45767	4.4096	4.40822	4.46505	4.38413	4.34092	4.64464	4.49854	4.45402	4.35118	5.1207	4.35307	4.5796	4.95824	4.52333	4.11366	4.49194	4.13607	4.4421	4.61916	3.69881	4.34863	4.91713	4.53186	4.15061	3.98639	4.52846	4.06242	4.75185	4.99734	4.16416	4.52711	3.9147	4.351
AGPAT4-IT1	4.64999	5.04123	4.75229	4.28007	4.94069	5.55712	4.80578	5.46171	5.00131	4.75249	4.76513	4.98882	4.96922	4.90534	4.83422	4.8732	4.82255	4.82513	4.71229	4.91485	4.84065	4.62716	4.6716	4.91604	4.93118	5.65323	5.40222	4.5549	4.51413	5.15923	5.44076	4.05638	5.10147	5.26489	4.95843	5.07695	4.95766	4.72704	4.65717	4.62131	5.03902	4.47779	4.70961	4.42313	4.81486	4.18182	4.52476	4.57806	5.24161
AGPAT5	5.02266	3.77836	4.21684	4.82079	5.24708	4.27355	4.72704	4.67658	4.78406	4.98027	4.78227	4.49684	4.71959	4.71146	4.65416	4.67832	4.54086	4.69002	4.68044	3.98341	4.81561	4.39332	4.38072	4.69277	4.59566	3.5865	4.13477	5.8138	5.08832	4.49286	4.2529	4.21103	5.11535	3.54768	4.40459	4.12665	4.40286	5.48248	4.69893	4.68241	5.01329	4.87133	4.43903	4.69413	4.92078	4.35047	4.65371	4.46767	4.08357
AGPAT6	5.258	5.05469	4.84024	5.46285	5.35045	5.78763	5.4656	5.66952	5.34802	5.28135	5.18418	5.40399	5.27724	5.03681	5.24846	5.15629	5.14503	5.27035	5.27744	5.35966	5.26667	5.38637	5.59786	5.34566	5.2625	6.17067	5.98966	5.1744	5.32434	5.52386	5.59294	5.41555	5.26714	5.48957	5.20885	5.16751	5.31425	5.33176	5.04854	5.0858	5.47007	5.00734	5.48628	5.12826	4.73863	5.12414	5.3601	5.15984	5.44717
AGPAT9	8.22123	8.51553	8.4148	6.91798	8.27545	7.85841	8.11289	8.49147	7.95091	8.15022	7.76368	7.80413	7.79749	7.95639	8.59777	7.83157	8.05425	8.17504	8.1902	8.09886	7.79178	8.09274	7.98081	8.08683	7.92086	6.59302	7.21496	7.62108	8.45164	7.55125	7.59064	7.9358	8.51777	8.22847	7.82276	8.03187	7.85255	8.25531	9.09651	8.30541	8.46127	9.07748	7.98766	7.84134	7.57265	8.3731	8.31998	8.00705	7.66627
AGPS	5.9049	4.71369	5.97804	6.10229	6.13295	5.62984	5.71105	5.13378	5.92749	6.10916	5.89092	5.83836	5.98736	6.0116	6.07228	5.97034	6.03088	6.03724	6.08237	5.18568	5.95444	5.63897	5.48201	5.84769	6.02856	4.31827	4.83945	6.9342	6.48732	4.64521	5.42691	5.66952	5.98054	4.43595	5.79809	5.5265	5.2627	6.37516	6.25134	5.90196	5.86253	5.79867	5.80071	6.09711	6.1913	6.16051	5.79401	5.49604	5.7042
AGR2	3.79503	3.46006	3.69189	3.28214	3.82231	3.42832	3.62105	3.94432	3.69133	3.55985	3.53562	3.59502	3.54768	3.37624	3.48744	3.49574	3.52513	3.56051	3.59368	3.55782	3.64709	3.49209	3.35243	3.54721	3.19576	4.08393	3.58857	3.57014	3.14852	3.86935	3.9799	3.91316	3.8563	3.91299	3.45691	3.44584	3.5274	3.62825	3.42921	3.68984	3.02295	3.28281	3.6533	3.54182	3.01132	3.43369	3.44445	3.65779	3.58937
AGR3	2.48421	3.02909	3.00744	2.846	2.42687	2.79206	2.94391	2.68337	3.0087	2.60442	2.63154	2.84695	2.84049	2.62751	2.60716	2.74606	2.72838	2.69843	2.70324	2.79441	2.79178	2.64017	2.50516	2.58361	2.7353	3.14927	3.10763	2.99065	2.83872	2.89225	3.02405	2.78045	2.62278	3.48093	2.69149	3.05443	2.63699	2.78335	2.81657	2.41914	2.92925	2.66007	2.69693	2.84022	2.60629	2.85429	2.54644	2.71423	2.64558
AGRN	6.09105	5.58252	6.41791	5.52999	5.81248	5.60089	6.05961	6.29892	6.05073	5.7474	5.79558	6.18931	5.91435	5.68921	5.74638	5.79131	5.7871	5.82683	5.67865	6.05269	5.82029	6.07464	5.86138	5.75854	5.76377	7.01437	6.08788	6.09986	5.36465	6.55067	6.19295	5.88888	5.59037	6.30738	5.88583	5.65887	5.84056	5.76926	5.92232	5.63567	5.51139	5.37694	5.47234	5.80802	5.72732	5.87002	5.65803	5.78037	6.1232
AGRP	4.5351	4.41573	4.23423	4.96641	5.20135	4.79169	4.60431	4.61196	4.57863	4.51153	4.80502	4.92395	4.87478	4.72153	4.63484	4.70419	4.71248	4.73823	4.74484	4.91585	4.65557	4.37604	4.60834	4.81997	4.70516	4.1376	4.5377	4.14982	4.82965	5.12978	4.73641	4.78309	4.91524	5.18587	5.05615	4.90858	4.58333	4.80986	4.5564	4.42914	5.01695	3.96753	4.56817	4.62737	4.05734	4.3568	4.11982	5.76115	4.89474
AGT	10.7007	11.1538	9.52261	10.718	10.8898	10.9035	10.6233	10.466	10.6747	10.7498	10.5779	11.0116	10.5944	10.7118	10.718	10.8686	10.6473	10.8618	10.5364	10.9107	10.4399	11.0268	10.606	10.5886	10.6115	10.7782	11.37	10.1854	10.0704	10.4294	10.6115	10.1341	10.2144	10.4399	10.1893	9.58815	10.982	11.187	10.3182	11.135	10.8489	10.2437	10.3182	11.6562	11.5631	10.8969	10.7238	10.9328	12.023
AGTPBP1	6.29702	7.45377	6.34837	6.71669	6.41544	6.09076	6.75374	7.34793	6.78247	6.73223	6.34492	6.25595	6.5395	6.40365	6.40578	6.49651	6.3266	6.39265	6.59811	5.87946	6.3718	6.11304	6.09505	6.71469	6.42293	6.36522	6.43376	6.04806	6.75693	6.36216	6.54194	6.5694	6.07895	6.2708	6.12895	6.69039	6.42437	5.67176	5.82029	6.43554	6.87288	6.83547	6.65005	6.83121	7.47047	6.43418	7.23413	6.40644	6.68775
AGTR1	6.22807	6.12018	4.92982	5.97997	7.21861	7.412	6.71075	5.68621	6.39542	6.12018	6.50947	5.59246	6.18006	6.31997	6.14339	6.15193	6.4613	5.89143	5.99344	6.16423	6.36558	6.49229	6.32099	6.52697	6.80552	4.93179	6.56864	5.82377	6.96321	5.76355	6.2222	4.93265	6.49513	6.88923	6.56412	6.92918	7.36804	5.85062	5.76507	5.73998	4.87339	6.20206	5.37969	6.99068	6.53583	7.17169	7.28946	6.14406	6.28164
AGTR2	3.59743	3.48744	3.7869	3.12849	3.34875	4.06185	3.36384	3.3648	3.41106	4.06529	3.38761	3.68051	3.58261	3.57164	3.53629	3.41758	3.9911	3.48073	3.66521	3.5283	3.30602	3.69548	3.4977	3.37314	3.8843	2.95743	3.41866	3.09685	3.45447	3.08067	3.45218	2.96062	3.12796	3.04951	3.15054	3.231	3.39635	3.49635	3.41777	3.42612	4.2807	3.33645	3.41153	4.3813	5.53708	4.50669	4.88925	3.16622	3.56903
AGTRAP	5.79585	5.48455	5.20624	6.30301	5.55024	6.09481	5.69985	5.81299	5.61381	5.69857	5.81197	6.00102	5.80071	5.77937	5.74449	5.76163	5.75607	5.89563	5.80992	5.97365	5.82534	5.91335	5.74966	5.72454	5.78219	6.05044	6.14638	5.84663	6.03515	6.22322	6.02104	5.9978	5.62956	5.91335	5.94605	5.25718	5.59617	5.75607	5.38331	5.64191	5.98888	5.64141	5.33406	5.92041	5.46465	5.64571	5.50454	5.69233	5.6907
AGXT	3.57723	3.66466	4.04804	3.91845	3.55679	3.74914	3.87474	4.04022	3.83186	3.58178	3.66637	3.75461	3.65194	3.69028	3.71787	3.71869	3.70155	3.72842	3.62418	3.71869	3.69675	3.8098	3.80941	3.72362	3.67246	4.40641	3.563	3.90735	3.59569	3.82416	3.5369	3.58539	3.41957	3.71292	3.85406	3.91448	3.24333	3.52592	3.74398	3.98658	3.31211	4.14942	3.8841	3.74319	3.63488	3.94304	3.67605	4.06702	4.21839
AGXT2	4.28185	4.29413	4.5197	3.62787	3.73681	3.30672	4.09187	4.3081	3.97681	3.62667	3.88325	4.05204	3.98105	3.84769	3.95276	3.98048	3.92385	3.85214	3.94236	4.1284	3.86995	3.56715	3.54919	3.63314	3.84089	5.06394	3.62582	3.69797	3.83084	4.28235	3.88136	4.2518	3.60961	4.63098	4.24703	4.1733	3.81534	3.79776	4.44824	2.77731	3.66324	4.1178	4.14056	3.5576	3.61492	4.14907	3.43421	4.15805	3.89301
AHCTF1	6.42764	6.2322	6.56984	5.87485	6.62393	5.53515	6.50916	6.3718	6.39673	6.32137	6.12719	5.91794	6.38841	6.24969	6.24279	6.11682	6.06818	6.05186	6.14884	5.47184	6.13903	5.91116	6.15227	6.24248	6.28802	6.02708	6.04497	6.26911	6.31346	5.31937	5.68573	6.41477	6.83171	5.91173	5.82484	6.38665	6.64854	6.39642	5.75203	6.19329	6.40334	6.33456	5.77223	6.22485	6.05269	5.9745	6.20108	5.62731	5.47208
AHCY	8.16299	6.95183	8.37092	7.4519	8.11729	7.70713	7.65918	7.03044	7.67456	7.68387	7.77505	8.02833	7.85922	7.79688	7.82859	7.78131	7.92393	7.95162	7.77806	8.02429	7.70635	8.13624	8.05581	7.83531	7.81536	8.66778	8.44941	7.63107	7.53224	8.75423	8.02127	7.41373	6.8562	8.21601	8.2744	8.08236	7.92014	7.80746	7.64465	7.96486	7.82058	7.2444	7.20283	7.61662	6.74659	7.91404	7.63479	7.61155	7.83383
AHCYL1	7.10816	6.91147	7.50578	7.13368	7.15396	7.78131	7.37387	7.61857	7.38778	7.33101	7.34906	7.33046	7.22911	7.18482	7.34629	7.2361	7.28216	7.16033	7.23864	7.27097	7.30202	7.40584	7.35444	7.21393	7.2471	7.07612	7.19936	7.79107	7.41034	7.11269	7.14677	7.1859	7.4069	7.2444	7.36533	7.72161	7.38078	7.38481	7.43755	7.15588	6.91577	7.20048	7.00821	7.06653	7.02954	7.18659	6.87245	7.19322	7.00987
AHCYL2	4.96393	5.3286	4.54627	5.34392	4.82513	5.08908	5.06893	5.02497	5.03924	5.04338	5.11151	5.04875	5.0719	5.0732	5.15923	5.05469	5.11942	5.07674	5.10473	5.18353	5.15984	4.81772	4.90092	4.98978	5.153	4.31147	5.11922	5.68996	4.94382	4.62222	4.62458	4.22466	4.27395	4.32365	5.44604	5.55418	5.4626	5.06893	5.16428	5.10556	5.08664	5.06869	5.15923	4.88966	5.00979	5.05765	4.88458	4.92877	5.32345
AHDC1	4.91504	5.28724	5.19935	4.77256	4.74301	5.02987	4.96108	5.31746	4.99832	4.75953	4.84923	5.01474	4.93416	4.81731	4.79907	4.85763	4.84686	4.90174	4.78683	5.06202	4.96208	4.96839	4.99041	4.83633	4.98553	5.65545	4.82214	4.64658	4.6962	5.45362	5.54115	5.19217	5.09338	5.17111	4.63133	4.71918	5.23157	4.63251	4.81339	4.5767	4.65477	4.80659	4.96815	4.60538	5.2858	4.82294	5.2076	5.20539	5.23778
AHI1	4.50925	4.81227	4.26054	4.55114	5.08888	4.4248	4.62458	4.47325	4.40269	4.73314	4.48368	4.35701	4.53046	4.61998	4.53984	4.56629	4.50242	4.44863	4.51456	4.25688	4.55043	4.79039	4.89579	4.78208	4.61838	4.5737	4.72722	4.69497	4.57293	3.94968	4.52693	4.59309	5.32883	4.90407	4.88907	4.16305	4.91057	4.90366	4.54783	4.61081	4.89454	4.73561	5.01736	4.54211	4.99524	4.19312	4.86396	4.0761	4.09148
AHNAK	5.51344	5.9859	6.23191	6.2375	5.92117	6.64783	6.04188	6.34158	5.92965	5.93839	6.03959	6.27044	5.99344	6.22064	6.20351	6.23403	6.34679	6.19578	5.98024	6.45033	6.13626	6.02654	6.05243	5.95131	6.14696	6.46446	6.26634	5.77247	5.93866	6.27235	6.83503	5.91541	5.90951	6.72876	5.94771	6.72956	6.71634	6.22485	5.94333	5.83836	5.47949	5.79531	5.85954	5.82112	5.57661	5.98506	5.53566	5.79427	6.49229
AHNAK2	4.98779	5.10408	4.51393	5.32109	4.16845	4.24273	4.8086	4.53028	4.66065	4.74484	4.69178	5.06499	4.76173	4.73092	4.79661	4.93265	4.64229	4.80597	4.61763	4.95299	4.8732	4.94111	4.77215	4.71405	4.62131	5.69462	4.88725	5.79974	4.70463	5.38774	4.24218	4.72855	4.51496	5.19827	4.45146	4.95864	4.51118	5.28292	4.63133	4.5551	4.59586	4.74549	4.44308	4.965	4.45973	4.8758	3.98826	4.86703	4.63936
AHR	6.93051	6.44845	7.41094	7.90093	7.59007	6.57232	7.37774	7.89036	7.2165	7.46154	7.33848	7.43237	7.15492	7.37046	7.21146	7.26737	7.16131	7.35957	7.38725	6.17316	7.2444	6.68851	6.5846	7.51964	7.05963	5.3946	6.34869	8.32876	7.27954	6.78084	6.28469	7.04504	7.01479	6.61527	6.74226	6.95443	6.45661	8.10238	7.88869	7.71635	7.62852	7.84945	7.46036	7.97422	7.31015	7.4639	7.06052	7.71213	7.44055
AHRR	4.49699	3.95335	3.8717	3.77873	3.50376	3.76292	3.60724	3.43975	3.81686	3.61336	3.98436	4.00665	4.02187	3.92887	4.11748	4.14752	4.0301	3.92158	3.93904	3.96714	3.93846	3.77515	3.77394	3.87904	3.91354	3.79933	4.07216	4.04721	3.32917	4.37156	4.3836	3.53246	3.77836	3.53351	4.05204	3.27456	3.74222	4.11135	3.36916	3.75323	3.61356	4.23064	4.78425	3.15892	3.73835	3.70837	3.91977	4.837	5.04789
AHSA1	7.86997	7.94421	8.05339	9.07168	8.19454	9.30428	8.51444	8.35355	8.43345	8.34358	8.30638	8.43541	8.37725	8.53517	8.54954	8.49881	8.57177	8.43434	8.40572	8.55531	8.56161	8.52936	8.48725	8.368	8.47117	8.19454	9.28993	8.73613	8.49147	8.89645	8.8198	8.32973	8.02039	8.54505	8.48393	8.79147	8.17504	8.23142	8.32497	8.61116	8.81671	7.8472	7.91919	8.07135	7.63351	8.45164	8.49998	8.18144	8.18043
AHSA2	6.08122	6.04776	5.68444	5.35849	6.60964	5.13314	6.09192	6.04975	5.85563	6.10589	5.98676	5.4267	5.6668	5.9106	5.72679	5.53901	5.57481	5.30519	5.90311	5.43149	5.73206	5.58502	5.55345	6.17353	5.93279	5.85145	6.61408	5.40743	6.219	5.565	5.26714	5.16645	6.07352	6.30403	6.43735	5.71281	6.06928	6.1639	5.73998	5.65002	6.46304	6.11391	6.18348	5.65026	6.09422	5.48769	6.1017	5.25758	4.60051
AHSG	4.19605	4.69081	4.23231	3.86132	4.10951	4.3367	4.12934	4.50281	4.03398	4.77625	4.1376	4.16997	4.16377	4.17279	4.16031	4.24803	4.23695	4.06775	4.05016	4.23603	4.18352	4.2344	4.32587	4.19984	4.1041	5.15884	4.11914	3.7199	4.32722	4.10683	4.32881	4.04784	3.87077	4.16109	4.39051	4.06718	4.16232	3.99826	4.01333	3.98302	4.11729	4.06734	4.49194	4.66025	4.6661	4.37585	3.99608	4.41918	4.55586
AHSP	4.23546	4.57252	4.46046	4.26429	4.14118	4.36457	4.45402	4.34282	4.6017	4.45973	4.32075	4.43595	4.40822	4.23715	4.19605	4.3869	4.27314	4.27201	4.26362	4.60431	4.21762	4.1376	4.09129	4.15767	4.38304	4.46486	4.30732	4.05492	3.90025	4.96729	4.87638	5.69857	4.59326	4.68938	3.90169	4.5206	4.5073	4.00375	4.63484	4.12096	4.18505	4.36396	4.39253	3.84968	4.11154	4.42914	4.31693	4.75531	4.8323
AICDA	3.1679	3.19554	2.90449	2.82655	2.87095	3.12116	3.00526	2.83432	2.94391	3.1272	3.10819	3.11242	2.97679	2.87588	2.98591	3.01844	2.92744	3.04819	3.07321	3.14673	2.93321	3.00155	3.16386	3.0871	2.84049	3.32647	2.99251	2.98161	3.02093	3.23008	3.1172	3.13318	3.15596	2.89751	2.89867	3.32386	3.37336	3.52019	3.12978	2.88128	2.77662	2.46725	2.76021	3.17141	2.91434	3.00258	2.85627	3.06522	2.96309
AIDA	9.22674	8.51777	8.26751	9.18021	8.83402	8.91975	8.92313	8.33069	9.05039	8.97583	9.11437	8.94869	8.95018	9.02399	9.0855	9.11067	9.02931	9.03895	9.06191	8.66574	9.13593	8.75987	8.49403	8.9804	8.95454	7.03433	8.08236	9.74182	9.24862	8.40273	7.97762	8.58052	8.77095	7.91537	9.22874	9.06686	8.69498	9.89386	9.22674	9.23884	8.6065	9.0405	8.53279	8.85871	8.58654	9.0259	8.59777	9.06686	9.01539
AIF1	7.02306	7.18435	6.47884	6.37516	6.47183	6.51552	6.53979	6.7419	6.51701	6.83503	6.92918	6.99068	6.82416	6.89654	6.56192	6.7767	6.64377	6.82012	6.89264	6.65527	7.0679	6.88969	7.07132	6.83171	6.60304	7.11368	7.1077	6.04776	6.82993	6.87022	6.61679	6.40509	6.13593	6.91661	7.07183	6.60849	6.66003	6.88531	7.08245	6.92963	6.91747	7.00949	6.5023	6.48905	6.02536	6.48905	6.14943	7.26364	6.54091
AIF1L	6.40475	6.30403	6.63086	6.19984	5.34173	6.21069	5.97227	6.38985	6.04497	6.44563	6.01356	6.17316	6.27044	6.15006	6.31906	6.28502	6.24772	6.30571	6.1913	6.52026	6.31346	6.46304	6.44992	6.11038	6.27459	6.26845	5.60589	5.98774	5.30998	6.67048	5.8768	6.47853	5.58555	6.58938	5.85454	6.70059	6.13417	6.46661	6.22385	6.30672	6.01527	5.89173	5.33017	6.65453	5.74423	6.83835	5.84796	6.68028	6.49576
AIFM1	7.12418	7.17118	8.01729	8.77515	7.79893	8.80122	8.06822	7.50166	8.14151	8.08512	8.15388	7.99621	8.02195	8.26954	8.17871	8.02507	8.05248	8.01368	8.03187	8.05079	8.14751	8.13377	8.33254	8.05963	8.08683	8.3259	8.3986	6.74973	7.64927	8.41905	8.79985	7.88334	7.40154	8.47813	8.19646	8.11469	7.31577	7.10728	7.70064	8.28746	8.22942	8.16643	8.05512	7.94112	7.95404	7.85555	7.97273	7.96188	7.43996
AIFM2	5.92691	5.68174	6.56794	6.34295	6.01527	7.24871	6.00213	6.32529	6.00154	6.17102	6.76476	6.15681	5.99985	6.26056	6.50451	6.01838	6.73598	6.08611	6.29791	6.23041	6.45625	6.44532	6.8226	6.24218	6.27715	6.84872	6.13806	5.98024	6.04131	6.2097	6.1973	5.76377	6.2356	6.79595	6.47364	6.63968	6.00816	5.71666	5.92608	6.31997	5.79558	6.4634	6.06022	6.25919	5.76692	6.98088	5.81094	6.09711	5.76533
AIFM3	4.76154	4.95881	4.13382	4.80986	4.40286	4.94523	4.51496	4.74962	4.50691	4.52527	4.77256	4.69771	4.78761	4.65497	4.65717	4.62499	4.68643	4.68608	4.82618	4.76472	4.6327	4.57651	4.79149	4.79059	4.78799	5.03272	4.97748	4.22337	4.18086	4.99852	4.59524	5.39884	4.34919	4.26394	4.47166	4.78567	4.55399	4.45056	4.55752	4.5828	4.51238	5.27455	4.7135	4.78859	4.75412	5.13189	4.38165	4.50691	4.39253
AIG1	5.44432	6.43872	5.88084	5.33697	5.19459	5.64397	5.74449	4.85226	5.5612	5.70599	5.6118	5.59519	5.64423	5.61406	5.5635	5.62089	5.63185	5.62707	5.63948	5.68767	5.67598	5.72656	5.93632	5.90284	5.7255	6.2654	6.39887	5.53943	5.53492	5.43816	5.27455	5.03424	5.97082	5.2425	5.88859	5.90518	5.89018	5.16732	4.89679	5.7474	5.62561	5.16751	5.48602	5.75745	5.43962	5.7006	6.18842	5.6939	5.58605
AIM1	4.65988	4.13796	4.67906	4.86227	5.04666	6.4842	4.78935	3.87654	4.79717	5.05167	5.64593	5.05725	5.73903	5.00175	5.41899	4.87001	5.37424	4.73621	5.09975	4.53378	5.46327	5.63317	5.79558	4.97127	4.93416	4.98779	4.45626	5.59944	5.15797	4.60349	4.12604	5.06869	6.26575	5.07232	4.72838	5.73928	5.92997	5.2952	4.29355	5.1902	4.84005	6.0024	5.44579	5.12957	4.23291	5.25982	4.22841	4.65835	4.32534
AIM1L	4.43578	4.6621	4.92261	4.1634	4.17727	4.69119	4.40477	5.10451	4.32017	4.50261	4.40922	4.58737	4.4311	4.44939	4.41419	4.44698	4.46291	4.44291	4.37682	4.53028	4.43261	4.42549	4.47701	4.48725	4.441	4.65034	4.33276	4.3534	4.37213	4.90654	4.67716	4.61938	4.14982	3.70034	4.42776	4.32382	3.76756	4.38031	4.77746	4.78045	4.16902	4.4715	4.73784	5.11211	4.41705	4.59586	4.19588	5.08705	4.97949
AIM2	3.76797	3.63845	3.9875	3.68353	4.17311	3.48419	3.71605	3.4072	3.36687	3.90692	4.52638	3.84089	3.73853	4.13382	3.755	3.60411	3.71805	3.77375	4.1108	3.81455	3.89752	3.91508	3.81823	3.58605	3.51515	4.84346	3.64171	3.23382	3.82715	3.94396	3.82189	3.91769	4.22304	4.40115	4.29489	3.668	3.82619	3.83681	3.38517	4.31714	4.11491	3.98088	2.93908	3.59676	2.88128	3.65718	3.83336	3.98212	3.92475
AIMP1	7.56187	7.02907	7.49585	7.06885	7.09214	6.85489	7.37899	7.39867	7.38655	7.33161	7.31757	6.84129	7.28781	7.44055	7.22811	7.2742	7.20646	7.18482	7.37101	6.53485	7.4069	6.89315	6.9455	7.3923	7.291	6.25986	6.56562	6.55776	7.1212	6.12565	6.51809	7.06653	7.129	6.37417	7.16532	7.19724	7.23461	7.42744	7.12373	7.42118	7.92315	7.6064	7.65581	7.63351	7.80324	7.59248	7.96879	7.28216	6.29507
AIMP2	7.31816	7.71823	7.9673	7.8708	7.03185	7.36533	7.45248	8.12424	7.55935	7.62361	7.48133	7.63617	7.49398	7.43938	7.52148	7.5076	7.52214	7.45922	7.37774	7.7333	7.45127	7.64148	7.86199	7.49048	7.53642	8.32194	7.47481	7.72628	7.47539	7.80682	8.07837	7.88954	7.0489	7.46652	7.3687	7.43346	6.78379	6.91577	7.41094	7.2617	7.6192	7.61081	7.50521	7.50457	7.67265	7.58623	7.30684	7.63825	7.46523
AIP	7.52984	6.84212	7.8081	7.70288	7.20569	7.76508	7.33046	7.01711	7.47116	7.5827	7.65783	7.71635	7.56358	7.5989	7.50642	7.58882	7.54937	7.68253	7.54737	7.83972	7.50578	7.78273	7.78131	7.52589	7.56946	8.01285	7.86997	6.48204	7.44714	8.06822	7.67648	6.92963	6.46629	7.63229	7.67265	7.53586	7.87665	7.5394	7.6064	7.58815	7.21198	7.23715	7.16181	7.72089	7.0385	7.63825	7.54874	7.59377	7.93282
AIPL1	4.48445	5.07736	5.13167	4.08141	4.42592	4.51221	4.46977	4.74838	4.53687	4.67519	4.55097	4.67342	4.59688	4.47269	4.47378	4.61838	4.4848	4.4088	4.433	4.65229	4.4711	4.49798	4.55152	4.52422	4.63951	5.11371	4.54387	4.20064	4.42007	4.86955	5.28745	4.27724	4.07252	4.84542	4.09716	4.78916	4.71744	4.23892	4.85345	4.36014	4.58434	4.48669	4.76392	4.59149	4.39796	4.68522	4.49342	4.73271	5.05744
AIRE	4.73703	4.6476	4.9382	4.98048	5.41493	5.21331	4.8321	4.91361	4.90249	4.6454	5.03005	5.19509	5.08243	4.9884	5.0088	5.08852	5.12478	5.11312	5.05558	5.31021	5.10513	4.57349	4.65537	4.8384	5.11942	5.17572	4.85825	4.38379	4.73411	6.09395	5.33334	5.79682	4.73452	5.83344	4.70576	4.18968	4.43469	4.97439	5.04014	4.85306	4.90384	4.86396	4.74069	5.26826	5.02555	4.8919	4.89091	5.53172	4.67397
AJAP1	3.61492	3.49836	3.5274	3.23881	3.35751	3.32197	3.37426	3.44464	3.39393	3.49209	3.45917	3.39857	3.4351	3.35896	3.35062	3.34675	3.36754	3.26353	3.30995	3.33442	3.39393	3.48786	3.44069	3.38495	3.39503	3.31135	3.3358	3.1724	3.65194	3.78257	3.82266	3.86879	3.70321	3.69981	3.0452	3.38257	3.28712	3.30602	3.32779	3.43836	3.24944	3.49122	3.33061	3.63089	3.4131	3.31617	3.31237	3.60037	3.54463
AJUBA	4.93676	3.53161	4.82844	4.5038	4.76637	4.74944	4.73928	4.60517	4.65034	4.45884	4.24381	4.53962	4.14161	4.43712	4.69296	4.40905	4.57513	4.4788	4.39598	4.48955	4.58573	4.57411	4.16305	4.5206	4.46467	4.54866	3.94493	6.28006	4.75953	4.4995	4.25888	3.94035	3.95904	5.05662	4.49819	4.05133	4.40211	5.04939	4.80176	4.64109	4.68063	4.36494	4.21195	4.5917	4.63212	4.351	4.46678	4.49607	4.31884
AK000798	3.81416	3.95238	3.24989	3.24333	3.74494	3.37897	3.67325	4.19906	3.62927	3.38065	3.38864	3.43772	3.4619	3.48184	3.49724	3.51491	3.36082	3.49595	3.54506	3.5971	3.32456	3.82231	3.55001	3.55659	3.40511	2.76745	3.38165	4.0187	4.07744	3.64531	3.13342	3.69065	4.31163	3.44001	3.26941	3.16936	3.60392	3.67136	3.62436	3.60702	4.2774	3.59763	3.37515	3.66697	3.57496	3.50461	3.30147	3.30283	3.3856
AK021537	4.85226	4.82122	5.1205	4.47487	4.50413	4.86249	4.76732	4.7102	4.71369	4.74962	4.86372	4.8956	4.86586	4.84667	4.86753	4.74441	4.70594	4.76033	4.69333	4.66454	4.71608	5.04398	5.23605	4.89272	4.71548	4.72722	4.71208	4.8956	5.11435	4.6015	4.51187	4.96965	5.43763	5.58252	5.2685	4.63013	4.60246	4.81103	4.85869	4.72216	4.41594	5.13907	4.4373	5.03551	4.34639	4.19293	4.47758	4.81471	4.38224
AK021804	6.99827	8.35151	6.71788	5.94071	7.93803	6.24342	7.81836	7.59695	7.21703	7.31577	6.85793	7.11454	6.98499	7.38303	7.20048	7.33423	6.77223	6.92017	7.23661	6.53447	7.21547	6.79183	6.39017	7.57781	7.24275	6.88624	7.83002	7.47047	7.51846	6.32068	6.95968	7.10193	8.39967	8.09446	7.95639	5.88746	6.84582	7.90004	7.73268	6.68666	8.75851	6.84542	7.75254	6.72133	7.4742	6.54556	7.70427	6.72264	7.41255
AK021933	3.19367	3.15795	3.66542	4.05544	3.02511	3.40852	3.28953	3.45855	3.13365	3.09191	3.43812	3.4697	3.38093	3.3683	3.40035	3.44712	3.39549	3.3792	3.43327	3.33954	3.24401	3.83817	3.8096	3.22081	3.31711	3.74338	4.16605	3.40899	3.67851	3.68192	3.31261	3.14007	3.28121	3.84497	3.59068	3.30761	3.43772	3.18053	3.18743	3.35196	3.19647	3.41982	3.19165	3.42982	3.69715	3.5204	2.9773	3.28528	3.3136
AK021977	6.43628	7.51104	6.48128	5.41469	7.01259	5.75286	7.31249	7.06183	6.53302	6.65005	6.43483	6.7522	6.57713	6.81726	6.75413	6.76791	6.79929	6.43909	6.77626	6.62097	6.71304	6.67783	6.21183	7.04334	6.86765	6.56641	6.81969	6.98233	6.42541	6.0466	7.21353	6.47954	7.8441	8.60764	7.23766	5.88607	5.82327	7.42805	6.68994	6.45694	7.53524	7.55317	7.09214	6.43518	6.95358	6.57424	6.80177	6.40906	6.88089
AK024936	2.67651	3.09113	2.74003	2.60389	2.51559	2.9376	2.76546	2.61213	2.79541	2.55818	2.5863	2.6951	2.61328	2.90017	2.80512	2.88325	2.8508	2.55818	2.62135	2.78974	2.86347	2.89343	2.96817	2.71351	2.60344	2.33026	3.05966	2.62325	2.62558	3.00026	2.94472	2.70959	3.03849	3.17463	2.83138	2.93463	2.76817	2.86879	2.92151	2.58475	2.78872	2.82237	2.80277	2.75362	2.74897	2.90395	2.50424	2.66007	3.11739
AK025288	6.82869	7.53271	6.49544	5.71666	7.99469	5.96617	7.18027	7.65054	6.45926	7.24168	6.57831	6.94903	6.72307	7.04334	7.10006	6.88397	7.00949	6.47333	7.17732	6.69263	6.92918	6.67084	6.44356	6.81639	7.07084	6.52452	6.18283	8.44113	7.51534	6.56675	6.88923	6.78462	8.10401	8.28558	7.19369	5.49241	5.8658	6.7545	6.84129	6.33292	7.71213	7.33798	7.5827	6.83381	7.09911	7.05278	6.56901	6.28704	6.56227
AK026905	5.10493	5.99462	5.12957	5.05317	5.41964	4.78704	5.11041	5.08832	5.18528	5.41964	5.18244	5.28768	5.37163	4.89983	5.1561	5.20194	5.07386	5.0406	5.27638	5.55154	5.0938	5.47277	5.51789	5.48816	5.28135	5.36445	5.567	5.87626	5.13232	5.36736	6.06539	4.99019	5.97752	5.33848	5.64722	5.24528	5.32157	4.99201	5.33987	4.98958	4.99041	4.89717	5.41734	4.67927	5.20947	4.92837	5.23667	4.6009	5.66036
AK054988	3.01715	2.62558	2.71187	2.64061	2.81081	3.13342	2.74794	2.47509	2.58526	2.95604	2.80957	2.65084	2.73495	2.87858	2.87034	2.84242	2.91024	2.8356	2.8789	2.83432	2.85573	2.78905	2.62325	2.75801	2.69106	3.15935	2.908	2.90657	3.50062	2.62919	2.34679	2.51838	2.79237	2.46995	2.8853	2.74037	3.21849	3.13559	2.80547	3.10631	2.56158	3.14749	2.63343	3.05704	2.85831	2.95059	2.58791	3.04493	2.61109
AK055458	2.96142	3.51298	3.4741	3.484	3.68246	3.6947	3.29805	3.90382	3.47453	3.30557	3.34697	3.40741	3.32197	3.38004	3.25783	3.28214	3.3474	3.3858	3.34761	3.46509	3.47187	3.61005	3.55273	3.54744	3.48337	3.50502	3.77097	3.36936	3.43791	3.83625	3.15818	3.47541	3.22177	3.50815	3.2776	3.38144	3.84441	3.55921	3.5215	3.31211	3.70877	3.02172	3.42636	3.43094	2.97923	3.28394	3.15278	3.46029	3.74302
AK055981	5.26314	6.05298	7.2554	6.71075	5.58275	6.42607	6.20321	6.12131	6.3375	6.41856	6.19702	6.12687	6.26159	6.34934	6.48699	6.44595	6.3217	6.29283	6.00494	6.61527	6.2229	6.52452	6.02258	6.07924	6.28068	6.2787	6.71788	5.71415	5.60931	6.57197	7.05963	6.10435	5.59495	6.52727	6.1461	6.50713	6.32392	5.53782	4.96622	6.79386	6.37689	6.32944	6.15006	6.77922	6.88708	6.59846	6.44196	6.31575	6.58051
AK056098	4.97644	4.70419	4.05075	4.71862	4.93352	4.81772	4.31658	4.37213	4.45076	4.66477	4.78642	4.70799	4.72395	4.75066	4.74242	4.74593	4.81417	4.75452	4.77823	4.8327	4.54905	4.84667	4.65596	4.79661	4.809	5.22668	4.28756	5.17006	4.99504	5.22864	4.90229	5.00487	5.02248	4.59524	4.47449	4.3732	4.09716	4.49492	4.88745	4.36812	4.3836	4.58953	4.59087	4.5796	4.2695	4.71939	4.75081	5.00859	5.12244
AK056982	3.62356	3.58562	4.90534	3.91279	3.4933	3.85809	3.95874	3.71766	3.94139	3.84968	3.87963	3.83681	3.78968	3.98493	3.87865	3.81268	3.78359	3.78419	3.92513	3.89589	3.92084	3.55405	3.68509	3.74319	3.53454	3.94321	4.24218	3.64591	3.89967	4.39146	4.85807	3.33485	4.02556	3.71503	3.9329	4.09553	4.0988	3.9911	3.69087	4.21646	3.86022	3.31067	3.26594	3.99384	3.64494	3.49481	3.52301	4.6454	3.49938
AK074476	4.31348	3.74494	4.0096	3.92217	3.86919	3.98881	3.96369	4.22704	4.0526	3.87984	3.90756	3.98676	3.89186	3.87326	3.96294	3.94118	4.05791	3.97825	3.86232	3.99826	3.86041	4.2358	4.13983	3.93213	3.96254	4.79059	4.23123	3.65698	3.77178	3.84106	4.16864	4.09243	3.81783	4.13777	4.31181	3.65073	3.77873	3.98436	3.72303	3.76614	3.99291	3.81612	4.06334	3.95027	4.19947	3.96672	4.205	3.74203	4.18197
AK090844	4.18522	5.4603	4.19215	4.45223	4.34206	4.20628	4.65988	4.81561	4.53924	4.40659	4.10256	4.12154	4.04156	4.06277	3.91552	3.93825	3.82731	4.33379	4.58714	4.40541	4.63212	5.25543	5.42015	4.86936	4.4365	4.56185	4.97218	4.4812	4.45146	4.13592	4.27255	4.22485	5.93897	5.48014	4.96945	4.41075	4.66739	4.95641	4.09129	4.65309	4.648	4.33958	4.42493	4.0301	4.13151	4.33362	4.66591	4.04997	4.46486
AK091729	3.68051	3.60207	3.53201	4.22053	4.09734	3.18966	3.75539	3.78968	3.77198	3.47763	3.62686	3.62764	3.50108	3.73445	3.69492	3.67285	3.63615	3.76697	3.66125	3.88856	3.63004	3.84089	3.98249	3.66447	3.84037	4.14907	3.79522	3.31237	3.44022	3.35987	3.96524	3.59569	3.7684	3.69226	3.67265	3.36528	3.77178	3.97388	3.66907	3.7524	4.29489	3.06102	4.18596	3.41038	3.96714	4.30732	4.28664	3.79387	4.22485
AK093205	2.85953	2.56389	2.68254	2.72477	2.71147	2.56439	2.75524	2.54829	2.70923	2.67891	2.62325	2.6067	2.65305	2.50901	2.50343	2.46725	2.48569	2.65036	2.59414	2.66213	2.45931	2.91899	2.93463	2.61606	2.62967	3.0259	2.61328	2.57453	2.91325	2.75698	2.68731	2.79206	2.7339	2.57984	2.43149	2.42197	2.63608	2.72222	2.86497	2.56158	2.76021	2.69347	2.5106	2.83623	3.05317	2.90657	2.8722	2.57679	2.64604
AK094644	3.7999	5.57935	4.27448	5.12763	4.31291	6.08456	4.92378	5.04687	5.57581	4.4468	4.46291	4.22148	4.32203	5.07736	5.03047	5.24932	4.93307	4.38564	4.94191	4.35118	5.50993	4.72975	4.60389	4.49492	4.87356	3.85307	4.77168	4.38245	4.56856	4.26155	4.28737	5.08374	5.79239	4.70342	4.40115	4.95459	5.14127	4.52546	4.68385	4.83561	4.74182	5.4267	5.17639	5.20782	5.11111	6.29791	7.4299	4.80923	5.48816
AK096159	3.16281	3.69492	2.73894	3.08684	3.84618	3.07068	3.15699	3.0871	3.34832	3.53351	2.85051	2.91677	2.95876	3.61189	3.25635	3.46489	3.22658	2.97463	3.15748	2.94281	3.29664	3.17934	3.57014	3.05894	3.09437	3.14695	3.20574	3.33906	3.49188	2.72037	3.11739	2.7665	3.56799	2.79342	3.11405	3.40348	3.14359	3.47517	2.94281	3.15	3.46297	3.06286	3.88856	3.73891	4.38285	3.30581	4.26093	2.74794	3.23775
AK097370	4.59326	4.13641	5.08559	4.87498	4.42549	4.3578	4.55003	4.42934	4.48425	4.62347	4.6716	4.58081	4.46467	4.56837	4.52693	4.56204	4.54443	4.64581	4.49417	4.61298	4.64637	4.55136	4.6706	4.67696	4.55419	5.02228	4.56703	4.75795	4.14982	4.07342	5.135	4.36435	4.36396	4.75026	4.36308	4.205	3.9306	4.62076	4.07446	4.77568	4.38413	4.62803	4.58934	4.49492	4.70481	4.67282	4.78366	4.34735	4.56647
AK097453	3.57561	4.18791	4.19657	4.24625	3.67344	3.91806	3.97769	3.67426	3.86879	4.20574	3.86132	3.88623	3.82867	3.82887	3.8565	3.93595	3.84148	3.77234	3.78198	3.87307	3.89301	4.07446	4.28968	4.10813	3.89571	3.86783	4.23084	4.38322	4.18253	4.24159	4.10296	4.23291	4.18968	4.57611	4.06204	3.81843	3.94374	3.67226	3.50663	4.35661	3.65923	3.28806	3.89338	3.85861	4.04681	3.94288	3.95219	3.62886	3.81649
AK098263	2.27823	2.81657	2.55263	2.80957	2.56158	2.63517	2.5751	2.57291	2.60297	2.22243	2.65084	2.5433	2.55384	2.62278	2.54138	2.54765	2.4989	2.50122	2.56561	2.34473	2.36629	2.6019	2.41798	2.64693	2.56101	2.35109	2.67137	2.66683	2.52338	2.58475	2.67728	2.64204	2.72477	2.78752	2.37913	2.39684	2.04373	2.57453	2.61606	2.86192	2.57398	2.63154	2.61012	2.73647	2.92571	2.83841	3.11698	2.60958	2.90922
AK1	9.17501	10.1854	9.28993	8.99113	8.82395	9.06537	9.26476	9.13593	9.34567	9.16185	9.18931	9.36908	9.36025	9.16962	9.24656	9.33441	9.18733	9.38478	9.30428	9.49433	9.17652	9.44957	9.50345	9.30645	9.31071	9.9599	9.58074	8.36055	8.77892	9.79011	9.81645	9.60117	8.55417	9.4359	8.7191	9.43333	8.6584	8.67194	9.31071	9.18931	9.1448	9.06037	9.46695	9.15218	9.05855	9.16185	9.30236	9.54621	9.66677
AK130486	4.64482	5.23542	4.59032	4.36793	4.83926	4.82513	4.98147	5.02282	4.99063	4.14712	4.77007	4.90489	4.7184	4.75995	4.87458	4.8321	4.85621	4.80293	4.87397	5.00634	4.81396	4.66293	4.77707	4.51949	4.91544	5.65778	5.66362	4.68763	4.49718	4.98656	4.87257	4.49646	4.41367	5.21215	4.56204	4.76987	4.94028	4.328	4.85206	4.55914	4.83441	4.35494	4.61157	4.85807	4.18069	4.25647	4.48898	5.23605	4.99221
AK131021	3.64954	3.39592	2.91975	3.22736	3.42178	3.47187	3.26399	3.1636	3.24585	3.18407	3.34761	3.33036	3.32735	3.40348	3.38471	3.41177	3.37804	3.44204	3.37715	3.49188	3.52851	3.03849	3.22107	3.23976	3.44645	3.57723	3.63927	3.98139	2.85479	3.38761	2.75006	3.94118	3.56135	3.44542	3.80615	2.86377	2.82524	3.60681	4.13267	3.19759	3.19488	2.92095	3.25783	3.26206	3.23705	3.10546	3.24098	3.04951	3.41268
AK2	5.76377	5.83755	5.68245	5.9862	5.74557	6.5694	5.87085	6.10198	5.95672	6.00326	6.01322	6.03988	5.94184	6.03222	6.04776	5.93025	6.09743	5.99897	5.95812	6.12501	6.02907	6.26321	6.18133	5.96332	6.00269	5.80024	6.30503	6.08672	6.10015	6.16451	6.34714	5.41018	5.60472	5.74083	6.06328	6.29024	6.09047	5.78866	6.05243	6.01134	5.88234	6.13027	5.63412	5.82327	5.77987	6.33818	5.92264	5.72607	5.84232
AK3	8.23602	8.85	8.3975	9.12685	8.80273	9.89034	9.0259	8.74596	9.02057	8.94869	9.01049	8.72685	9.04502	9.10675	9.12504	9.16185	9.02771	8.95807	9.20873	8.32295	9.19919	8.26847	8.24282	8.95454	9.16185	7.9548	8.55657	8.74465	9.03424	7.81986	7.9673	9.71239	9.85365	9.02399	9.61092	8.82136	7.89698	8.9181	9.34567	8.49147	8.51216	8.89494	9.0009	8.82813	9.30053	8.09618	8.74874	9.27107	8.54234
AK5	4.61138	3.69881	3.95937	4.93971	3.96007	4.06702	3.93981	4.10138	4.48975	4.51259	4.09917	4.19848	4.34449	4.12476	4.28846	4.04879	4.30178	4.40584	4.32571	4.29262	4.13477	4.21592	4.31605	4.20574	4.45402	4.07446	5.26022	4.44824	4.84346	3.87784	4.87279	3.7587	4.43006	3.23881	4.1219	3.6674	4.47166	4.24025	4.4246	3.74893	3.55881	4.54003	4.65497	4.55419	4.43376	3.91918	4.40115	4.23252	3.84618
AK6	8.53402	7.91332	8.9706	7.79893	7.60391	7.72905	8.20465	8.83236	8.30447	8.29628	8.15679	7.60143	8.29628	8.17258	7.94656	7.93054	7.84945	8.07618	8.30341	7.26364	8.26847	7.57583	7.90338	8.40476	8.35355	7.08779	7.705	6.93986	7.98	7.95232	7.51355	8.28746	7.98838	7.44055	7.89698	8.6471	8.52936	8.49881	8.48393	8.27744	8.41999	8.31207	8.04654	8.32876	8.41793	8.51129	8.58654	8.2903	6.4101
AK7	3.97973	4.20139	3.83569	3.81078	4.15438	4.40602	4.02115	4.02039	4.22783	3.96007	3.99344	4.06775	4.099	3.9235	4.00138	3.9977	4.01161	3.95795	3.948	4.08527	4.0932	4.06355	4.00117	4.00299	3.94932	4.5483	4.46117	4.25559	3.81924	4.48233	4.73192	4.05492	4.28476	4.57429	4.05716	4.16921	4.21177	3.84406	3.95256	3.78297	3.93709	3.66521	4.01715	3.80755	3.9308	3.56715	3.61859	4.02097	4.30922
AK8	5.87135	6.29187	5.50023	5.16305	5.60697	5.38685	5.61476	5.85277	5.63081	5.3991	5.59412	5.74892	5.63995	5.41266	5.61501	5.67094	5.64241	5.58426	5.61623	5.97777	5.57661	5.4183	5.40743	5.51344	5.60589	6.43483	5.74868	5.28791	4.93518	6.00908	6.56758	5.93483	5.17919	5.92735	5.40977	5.96918	5.78576	5.06433	5.7144	5.153	5.39717	5.73384	5.91903	4.67103	5.27998	5.60235	5.42927	5.66335	5.63265
AK9	4.32457	4.13517	4.10429	4.876	3.97625	4.77452	4.39943	4.6438	4.42383	4.40017	4.38505	4.37453	4.46561	4.50861	4.40443	4.55325	4.4246	4.49684	4.56066	4.55264	4.51187	4.09111	3.98158	4.21215	4.449	2.91949	3.91448	4.02387	4.03064	3.89167	4.05315	4.69313	5.50526	3.71605	4.29187	4.38564	5.00552	4.32109	3.94742	4.50787	4.92715	4.10069	4.67867	4.81243	5.23994	4.59627	5.03782	4.54425	4.39381
AKAP1	6.97114	7.313	7.79688	6.97194	7.02115	8.02587	7.25788	7.22609	7.31461	6.97957	7.28377	7.23513	7.13223	7.33699	7.31131	7.36982	7.34463	7.27257	7.2742	7.42235	7.50702	7.37441	7.26643	7.45978	7.44952	6.74506	7.38951	6.21373	6.94194	7.29363	7.449	7.29312	7.22911	7.83604	7.19171	7.42629	7.60391	6.48388	6.57713	7.47539	7.12025	7.21811	7.13799	7.37494	7.59035	7.52857	8.08076	7.43882	7.22563
AKAP10	5.06893	5.79728	4.63151	4.87539	5.0909	4.68044	4.86915	4.80293	4.8633	5.04082	4.97827	4.75976	4.87133	5.25234	5.08974	5.16712	5.05912	5.045	5.14961	4.77431	5.09805	5.07476	5.10205	5.0406	5.18794	3.79579	4.49854	5.18131	5.43013	4.72112	4.44863	5.27082	5.94525	5.14961	5.23627	4.5626	4.55895	5.35268	4.87093	5.57759	5.43568	4.59789	4.82965	5.34481	5.28064	4.9429	5.02411	4.98676	4.88009
AKAP11	6.97147	6.67322	6.57861	6.21337	6.8562	5.81069	6.42083	6.24375	6.64701	6.42575	6.53516	6.49513	6.44563	6.62061	6.53964	6.56227	6.55278	6.49759	6.62823	6.27459	6.37587	6.5052	6.40095	6.70816	6.56562	5.00836	6.13937	7.05468	6.72633	5.87374	6.2768	6.94639	6.84542	6.5891	6.66709	6.08183	6.47605	6.81235	6.41477	6.42607	6.98798	6.5126	6.63128	6.35587	6.76553	6.14884	6.36449	6.4757	6.95358
AKAP12	6.30169	5.23326	5.76563	6.872	6.42898	6.85704	6.22971	5.82741	6.39993	6.62322	6.29089	6.45283	6.59595	6.34193	6.61255	6.41714	6.51016	6.51951	6.58086	6.28228	6.55776	6.29922	6.24314	6.48315	6.37833	5.3685	6.44775	6.80754	6.97374	5.13632	6.2672	6.05448	6.55812	4.75837	6.56719	6.53019	7.05229	6.61067	6.8067	5.98774	6.35587	6.04497	6.77341	6.75856	6.86598	5.99548	6.0729	5.9106	6.27617
AKAP13	6.79516	7.39115	7.52589	6.32036	6.6236	6.47884	6.84915	7.08587	6.71823	6.75492	6.57025	6.89695	6.79894	6.81885	6.92963	6.97788	6.88531	7.01124	6.85536	7.24871	6.81032	6.74896	6.80054	6.82376	6.75174	6.6316	6.7545	6.32944	6.14943	6.98545	7.24757	6.93945	7.6064	7.62617	6.95358	7.42401	7.66627	7.23413	7.52984	6.34994	6.77752	6.69459	6.96783	6.29573	6.28068	6.51988	6.5612	6.71345	6.93543
AKAP14	2.51633	2.43836	2.93846	2.65628	2.87496	2.78653	2.68693	3.63681	2.64116	2.58475	2.53158	2.65139	2.52838	2.5863	2.56101	2.5027	2.60247	2.57882	2.60958	2.58418	2.53158	2.63154	2.49366	2.50343	2.53158	3.12547	2.58418	2.84436	2.38884	2.75592	2.51633	2.77193	2.65445	2.92264	2.67976	2.4426	2.93407	2.82906	2.29003	2.5227	2.77397	2.68424	2.56272	2.93184	2.70994	2.47164	2.87466	2.90075	2.89054
AKAP17A	5.39762	5.11453	4.93698	5.85118	5.3946	5.78191	5.49604	5.69825	5.51832	5.38797	5.46987	5.47715	5.57833	5.51928	5.41336	5.39545	5.42494	5.32883	5.39504	5.48317	5.47974	5.47452	5.31592	5.49062	5.46195	5.50092	5.80224	6.01294	5.86063	5.68594	5.54392	5.59715	5.17572	5.40222	5.30451	5.33176	5.54251	5.58726	5.37838	5.67048	4.99504	5.64693	5.41423	5.61874	5.05597	5.38867	5.40151	4.96376	4.84346
AKAP3	5.73363	7.34136	4.62241	5.37212	8.57063	6.83333	6.00356	6.872	6.69651	5.74028	5.94554	6.32786	7.43646	6.76182	5.02965	6.12895	5.75473	5.91464	6.35928	6.57106	5.62756	6.40809	6.10589	5.49925	6.00494	5.8955	7.45439	5.18396	4.99104	7.44525	6.96018	5.29091	4.52214	5.97337	5.37858	8.47469	7.03234	5.20671	5.35003	7.65054	7.01217	5.89718	6.21401	6.17721	6.11095	8.20548	8.50897	6.57383	5.65753
AKAP4	3.84734	4.24218	4.45901	3.89534	3.98916	4.25909	4.26302	4.43151	4.01674	4.14868	4.04338	4.12971	4.10518	4.18576	4.23123	4.23291	4.19062	4.08261	4.15857	4.23029	4.22932	3.74673	3.49656	4.05826	4.22304	4.2722	3.84948	3.16517	4.04229	4.48084	4.60329	3.95202	3.71031	4.4995	3.87803	4.03214	4.39847	4.13839	3.86003	4.06915	3.4619	4.45668	4.19906	4.64999	3.70095	4.3732	4.24857	4.87717	4.66454
AKAP5	3.39718	3.65879	3.45938	3.19488	3.35572	3.04308	3.48765	3.19708	3.49105	3.31445	3.33397	3.31403	3.34832	3.14007	3.13209	3.18359	3.1744	3.40511	3.40371	3.3425	3.37558	3.43265	3.42221	3.29117	3.2615	4.00101	3.27527	3.88794	3.54834	3.77873	3.21103	3.25853	3.51146	3.23263	2.94391	3.07297	3.20231	3.30147	3.23033	3.34832	3.21492	3.44942	3.08469	3.53351	3.53651	3.34128	3.24171	3.42636	3.61398
AKAP6	5.31615	4.65052	5.22251	5.17723	5.31526	4.80758	5.22206	5.20114	5.24639	5.12393	5.03149	5.11413	5.00608	5.23178	5.08075	5.36356	5.18927	5.12001	5.13996	5.16668	5.28242	5.11618	4.78087	5.22711	5.02023	5.24639	4.75289	4.01486	4.49063	4.58414	5.4138	5.37969	5.40929	5.76979	5.2111	4.65537	4.92519	5.03128	4.72256	4.75123	5.61333	5.05489	5.49039	5.11516	5.78461	4.95864	5.56829	4.73928	5.22296
AKAP7	5.92264	6.03692	6.47644	5.35966	6.00269	5.29674	5.64445	5.73572	5.86113	5.95212	5.98347	5.69201	5.93395	5.82303	5.76979	5.84433	5.80201	5.68016	5.88914	5.65778	5.7688	5.39884	5.62483	6.03515	5.81922	4.89827	5.68042	6.38531	6.11444	5.17264	4.49854	5.61669	5.50192	5.00899	5.75047	5.68145	5.54368	5.55366	5.6482	6.15531	5.97138	6.03724	6.03166	5.86631	5.6185	5.78321	5.93279	5.58555	5.6962
AKAP8	6.46595	6.97555	6.22688	6.8797	6.50596	6.13838	6.53736	6.16817	6.54886	6.53019	6.69105	6.55179	6.76703	6.56604	6.56794	6.49833	6.62173	6.48028	6.57499	6.58201	6.57347	6.51084	6.77713	6.55179	6.60482	6.8205	6.31704	6.26815	6.64819	6.77421	6.62823	6.5934	6.7123	6.15618	6.49867	6.78817	7.26737	6.37014	6.41407	6.43159	6.29411	6.44125	6.76135	6.94594	6.42367	6.30477	6.74973	6.09272	5.83755
AKAP8L	5.2205	6.01208	5.54997	5.96248	5.76951	5.69201	5.6668	5.72284	5.68996	5.63055	5.66952	5.78866	5.74841	5.72633	5.74292	5.72834	5.73973	5.64543	5.65704	5.96892	5.57282	5.68971	5.65624	5.62307	5.7606	5.83059	6.12196	4.72892	5.17745	5.77223	5.51928	5.78763	5.79531	5.93253	5.67893	5.83033	6.04497	5.71125	6.16083	5.91823	5.51832	5.5564	5.89526	5.64165	5.17596	6.05073	5.88506	5.94305	6.20232
AKAP9	4.90779	6.07895	5.03482	4.79081	5.08995	4.88009	5.43273	5.04123	4.89964	5.02753	5.32089	5.07498	5.18702	5.3331	5.03005	4.97686	4.85557	4.91893	5.09805	4.5239	5.2251	5.27528	5.17371	5.54088	5.0088	4.88458	5.37901	4.98999	5.27659	5.06843	4.94191	5.57481	6.04246	5.95471	5.23932	4.73351	5.89143	5.40041	4.99145	5.46465	5.50454	4.7978	4.91257	4.79494	4.94419	4.44155	5.07014	4.81227	4.92837
AKIP1	7.10107	6.47183	7.15009	7.60511	6.89823	7.64261	7.09162	7.81536	7.1634	7.26643	7.26839	7.26643	7.2109	7.28169	7.19566	7.22164	7.20179	7.20694	7.24871	7.29781	7.16131	7.0091	6.96783	6.89695	7.17464	6.85664	6.97147	6.905	7.82566	6.55701	6.69307	7.607	7.05685	6.40399	7.5931	6.98499	7.13616	7.412	7.11494	7.24124	7.17418	6.99683	6.90763	7.44952	7.34024	6.99456	7.07415	7.1168	7.24974
AKIRIN1	6.4757	5.71802	6.34058	6.6493	6.09105	7.70359	6.31775	6.40399	6.49112	6.42664	6.6508	6.58533	6.83716	6.64744	6.64593	6.55313	6.66261	6.70175	6.73676	6.78504	6.69898	5.91389	5.7047	6.41753	6.60993	3.65309	5.42783	6.05567	5.9533	5.85717	6.88307	6.20478	6.71823	5.59917	6.39049	7.37101	6.95882	6.76098	7.42928	6.49112	6.58051	6.86902	7.18972	6.54886	7.03708	6.44325	6.73779	6.54886	6.21996
AKIRIN2	6.9884	6.03898	6.69496	6.8956	6.10948	6.76553	6.26746	6.71345	6.47605	6.55278	6.91195	6.78247	6.70257	6.85704	6.81885	6.84337	6.83426	6.79851	6.75856	7.01854	6.79516	6.5159	6.33081	6.25471	6.77223	4.96729	6.10648	6.25192	6.6818	6.20043	6.94501	5.96755	5.71828	5.57481	6.67122	7.31403	6.50113	7.08978	7.66173	6.84011	6.04271	6.95571	6.67908	6.87112	6.47261	6.95308	6.56758	6.85081	6.8275
AKNA	4.49528	4.69063	4.25559	4.69002	4.92078	5.26757	4.82943	4.76371	4.77452	4.66108	4.78779	4.73951	4.68101	4.72055	4.70297	4.61595	4.62821	4.70613	4.74137	4.87698	4.7188	4.98416	5.13232	4.66998	4.60051	4.84242	4.41328	4.75933	4.37194	4.74069	4.61595	4.39716	4.97298	4.909	4.57882	4.44564	5.19041	5.00363	4.38944	4.76413	4.96901	5.20135	4.71707	4.4468	4.63697	4.8962	4.49987	5.02597	5.09587
AKNAD1	2.78718	2.96686	2.71734	2.73242	2.85542	2.70554	2.632	2.57984	2.70165	2.81081	2.7233	2.71813	2.76714	2.77462	2.78942	2.82364	2.84022	2.82462	2.78618	2.71684	2.80585	2.71734	2.77523	2.69547	2.77092	2.77838	2.80439	3.02537	2.94766	3.05368	2.86012	3.21643	2.6735	2.8006	2.8359	2.78045	2.60861	2.72551	2.64726	2.63474	2.88505	2.86472	2.8278	2.48342	3.22278	3.10943	2.84533	2.60819	2.84987
AKR1A1	9.11802	9.52787	8.31909	8.8355	8.58423	9.19919	9.04849	10.0957	9.0926	9.10675	9.07748	9.14145	9.07168	8.99447	8.98819	8.91333	8.99269	8.99616	8.91023	9.14306	9.02238	8.9706	9.08737	8.83236	9.06191	9.75255	9.46204	9.06856	9.23662	9.01386	9.22674	8.15488	8.09028	9.15979	9.1481	9.01896	9.03737	9.02399	8.97878	9.09985	8.95308	9.1319	8.59529	9.22674	8.7763	9.22674	8.83849	9.02399	8.86483
AKR1B1	10.9107	10.8563	9.99699	10.4234	8.9743	9.6264	10.4562	9.36241	10.5026	10.1146	10.239	10.2784	10.239	10.2528	10.1813	10.3853	10.248	10.1301	10.0168	10.2144	10.2827	10.6946	10.6356	10.3556	10.0244	10.718	9.76098	10.37	10.2437	9.67551	8.49998	10.0004	9.09818	10.7374	9.59321	10.7118	9.70111	11.1437	9.85365	10.9184	9.71821	11.0042	9.34127	10.9248	9.22464	11.195	9.61092	10.758	9.84701
AKR1B10	4.08373	4.76689	3.67013	4.23458	3.22613	3.51954	3.7684	3.99826	4.06932	3.46662	3.38842	3.56799	3.81801	3.85367	3.67172	3.76175	3.66907	3.75712	3.7882	3.69734	3.7201	3.78399	3.70693	3.94568	3.73345	3.9875	3.56385	3.75712	3.54768	3.28437	3.05368	3.84734	3.7035	3.59743	3.51214	4.73291	4.28399	4.01523	3.56485	3.89497	3.75095	4.08281	3.68192	3.72946	3.10128	4.23929	3.31824	3.73248	3.04845
AKR1C1	6.16573	6.41544	6.29157	6.4634	6.96743	7.50047	6.61368	7.12807	6.60441	6.48699	6.81344	6.64854	6.59955	6.84092	6.83463	6.63559	6.97147	6.71019	6.68543	6.83503	6.79265	6.67523	6.85704	6.77178	6.70095	6.67555	7.07084	6.26289	7.04797	6.35959	7.13467	6.17805	7.23023	6.2654	7.10193	6.71002	7.20955	6.2654	6.59699	6.74506	6.99683	6.24375	6.39297	6.20013	6.27715	6.8878	6.29922	6.41856	6.94818
AKR1C3	8.25603	7.19369	8.16214	8.07227	8.37522	9.62184	7.9869	8.95308	7.99385	8.69914	8.72936	8.36271	8.25982	8.60247	8.61626	8.04817	8.81214	7.92086	8.53402	8.31808	8.59529	8.73871	9.14999	8.40572	8.54004	8.69117	8.76788	8.29237	9.26043	8.21433	9.01386	7.44525	8.14332	7.35502	8.89645	8.85713	8.46335	8.47813	8.08424	8.85871	7.95315	7.90571	7.58882	8.23989	8.37841	8.88404	7.76739	7.65647	7.60007
AKR1C4	2.80957	2.87682	3.12978	2.62967	3.35387	3.33485	2.85297	2.6757	2.89605	3.37783	3.06128	2.88183	2.93014	2.9687	3.06651	2.84279	3.14695	3.00315	3.10738	3.10872	2.99172	3.21376	3.71465	3.1303	2.7457	2.63428	3.25307	2.99783	3.76253	2.91614	2.89867	3.09998	2.60247	2.93212	2.95691	3.2762	2.72661	3.13813	2.76853	3.1448	3.22906	2.52059	3.39906	3.20433	2.98239	3.18537	3.10763	3.12645	3.07167
AKR1C6P	3.52236	4.34584	3.88753	4.20351	4.21083	4.32365	4.1791	4.07216	4.5244	3.65779	3.93232	3.99439	3.9233	3.96542	3.99194	3.95578	4.04784	4.23346	4.23047	4.22704	4.40096	3.76411	3.92792	4.35996	4.28949	4.95048	4.32684	3.9599	3.75078	4.18726	4.23948	3.86977	4.12361	5.21543	4.13025	4.43615	4.55529	3.88081	4.06592	3.91223	4.3881	3.76735	4.41419	3.48268	3.87945	3.61441	4.03085	3.61986	4.10466
AKR1D1	2.6242	2.76578	2.53093	2.38736	2.90538	2.43149	2.56837	2.92797	2.59718	2.61942	2.55071	2.63792	2.5271	2.48731	2.40443	2.62695	2.38243	2.35549	2.47328	2.46524	2.50753	2.54573	2.50047	2.30813	2.52771	2.7149	2.86107	2.839	2.60536	2.66514	2.77523	2.58526	2.62598	2.90335	2.66839	2.72367	2.63839	2.50986	2.34473	2.7233	2.49537	2.78579	2.41914	2.34679	2.49455	2.69347	2.5246	2.16068	3.13183
AKR1E2	4.13458	4.63232	4.38072	4.11692	3.96881	4.60815	4.16921	4.04208	4.23732	4.21914	4.2518	4.31181	4.31013	4.19657	4.29507	4.25069	4.24537	4.34206	4.18839	4.46448	4.41328	4.55079	4.65655	4.30596	4.28622	4.40922	4.51707	4.76452	4.5351	4.25421	4.38922	4.06718	4.38826	3.38649	3.84712	4.35605	4.21289	4.08527	4.44076	3.79915	4.36991	4.17208	4.1447	4.09341	4.29507	4.53962	4.64981	4.54744	4.76849
AKR7A2	7.59248	7.25847	8.13032	8.41905	7.39812	8.52099	7.91042	7.72571	7.93803	8.06046	8.0971	8.04981	7.91842	8.01627	7.93959	7.94571	8.01542	8.00232	7.91769	8.07754	7.85098	7.98458	8.09274	7.84057	7.94112	8.75705	8.43887	7.96032	8.58777	8.00057	7.67133	7.32265	7.1168	7.84945	8.32973	7.74354	7.91769	7.50109	7.15541	8.15488	7.8978	7.80102	7.26589	8.10238	7.97105	8.05165	8.08683	7.68906	7.9358
AKR7A3	5.27638	5.29339	5.78241	6.08365	5.13378	6.04246	5.72679	5.72885	5.76218	5.60089	5.71105	5.80511	5.68199	5.58155	5.54368	5.54485	5.59839	5.55927	5.53427	5.73724	5.54758	5.85302	5.84344	5.64065	5.66908	5.85742	6.12661	5.61229	5.97307	6.04806	5.20782	5.13296	4.93085	5.58128	5.67337	5.61433	5.64593	5.39786	5.18862	5.73973	5.46465	5.50697	5.18587	5.63846	5.94692	5.57282	5.77302	5.37493	5.4265
AKT1	7.29161	7.9641	7.54398	8.09446	7.93959	7.98995	7.84571	8.17871	7.84495	7.7603	8.06142	8.10238	7.96953	7.705	7.91537	7.88558	7.89392	7.9126	7.88725	8.16555	7.91769	8.05079	7.89328	7.85408	7.87665	7.25847	7.93134	7.39058	7.80324	8.41999	8.44723	7.02592	7.55196	7.16586	7.95004	7.56749	7.51667	8.368	8.45682	7.6953	7.60886	7.53102	8.16043	7.94036	7.8655	7.73809	7.47834	7.89392	8.47011
AKT1S1	4.79661	5.26431	5.00065	5.84663	5.51614	5.79755	5.31974	5.47856	5.29897	4.98126	5.59246	5.69932	5.59111	5.31312	5.45128	5.5067	5.49391	5.56162	5.35544	5.8408	5.48816	5.41945	5.166	5.10125	5.52573	3.92868	5.49266	5.4058	4.8042	5.59135	5.82877	4.84146	4.54171	5.41878	5.5077	6.44426	5.72407	5.54368	5.72153	5.44199	5.08513	5.05933	4.73804	5.72454	5.43816	5.8403	5.95841	5.3563	6.53516
AKT2	4.85103	5.289	4.92673	5.00696	5.35988	5.77382	5.22603	5.24886	5.2148	5.03339	5.19935	5.25823	5.12268	5.06303	5.13847	5.13679	5.11535	5.12662	5.15322	5.31819	5.2425	5.24205	5.29674	5.15046	5.16922	5.87734	5.1183	4.87298	4.98349	5.23326	4.82965	5.12683	5.4434	5.44174	5.7741	5.39364	5.4769	4.95255	5.22296	4.77707	5.05469	5.75958	5.253	5.14355	5.20453	5.12662	5.02555	4.94382	4.76689
AKT3	5.44987	5.28745	4.55061	5.18068	5.53806	5.25888	5.1183	4.97086	5.13314	5.23281	5.14439	5.27132	5.24445	5.41713	5.35521	5.41038	5.36332	5.38353	5.32134	5.153	5.31746	5.18587	5.23868	5.22296	5.29386	4.46977	4.84923	5.56185	5.24079	5.01046	5.13252	5.08453	6.10861	5.32508	5.49317	5.31974	5.52094	5.84688	5.83705	5.31247	5.02675	5.07547	5.16113	5.10598	4.54744	4.97686	4.92715	5.26942	5.70365
AKTIP	7.81253	7.42293	7.30786	7.75741	7.1491	8.02357	7.40922	6.97653	7.62797	7.66805	7.68185	7.66747	7.85408	7.83908	7.75606	7.74417	7.65783	7.725	7.82132	7.80547	7.79614	7.57655	7.41726	7.72974	7.82859	6.42764	7.37836	6.60627	7.27197	7.47116	7.87308	8.07498	7.80682	6.51188	7.83308	7.90961	7.60764	7.46227	7.03384	7.61602	8.19373	7.49048	7.88641	7.44119	8.14751	7.36241	7.61348	7.78273	7.74167
AL022341.3	5.27218	5.80562	5.75607	4.66739	5.16323	4.98882	5.00088	5.69097	5.04708	4.9507	5.33334	5.36508	5.3583	5.23645	5.35045	5.41423	5.323	5.22315	5.16792	5.42424	5.21421	4.99332	4.89412	5.30147	5.18882	6.30859	4.88167	4.64717	5.2925	5.57458	4.97791	5.64397	5.0907	5.1827	4.50164	4.48917	5.03169	5.00088	5.42829	4.95399	4.87758	5.54322	5.27318	5.52527	4.88167	5.87545	4.94669	5.63663	6.05186
AL022344.5	2.56212	3.15647	2.79342	2.80772	3.20433	3.29529	2.77462	2.68515	2.71187	2.97815	2.8789	3.04604	2.98462	3.13935	2.8981	2.95691	2.98406	3.05032	2.87156	2.91469	2.92925	2.64654	2.86629	3.07193	2.98721	2.55136	2.75252	3.58817	3.23559	3.33485	2.79479	2.60629	2.91298	3.33886	3.03958	3.17586	2.97012	3.54486	2.46431	3.328	2.90566	2.98406	2.65706	2.87714	2.79408	2.62085	3.44204	2.78718	3.32105
AL109706	2.80215	2.98835	2.43149	3.3601	3.29464	3.02004	3.17115	3.54677	3.01383	2.85509	2.81051	2.83711	2.79206	2.98641	3.04332	3.02117	3.03511	2.98616	3.0327	2.93817	2.86723	2.77397	2.84727	3.01792	2.79732	3.05443	2.54261	3.72593	2.69767	3.22986	2.71224	3.1303	3.19783	3.11845	3.00082	2.90829	2.88614	3.02036	2.78241	3.44204	2.74069	3.04682	3.23976	3.02093	2.97333	3.01949	2.71267	3.01271	2.85896
AL132709.8	4.01599	3.54036	3.66125	3.05346	4.10864	3.16841	4.06415	4.39417	3.35125	3.80342	3.23805	3.57537	4.00084	3.52784	3.53871	3.41552	3.62088	3.724	3.32244	3.55824	3.4697	3.06605	2.59472	3.31186	3.5431	3.36983	3.00068	4.36362	3.46853	3.19416	3.7428	4.13948	6.23816	4.3415	4.19254	3.65516	3.58092	4.2316	3.24989	3.45304	3.72114	3.65008	3.68111	3.28099	3.93846	3.44691	3.53454	3.1719	3.24832
AL133493.2	3.05032	3.00203	3.37358	2.72144	3.30424	3.06155	3.30648	3.22129	3.0974	3.03796	3.06575	3.03561	3.03458	3.02004	3.05241	2.99251	3.01102	2.99859	3.01102	2.95854	3.13607	2.89486	3.12671	2.88641	2.77763	3.3648	3.13318	2.99726	3.08764	3.12747	3.37248	3.42548	3.39811	2.97117	3.23236	3.06155	3.04742	2.78045	3.27344	3.31067	3.23185	3.02117	3.33784	2.82561	2.87002	2.76333	3.16841	2.74606	3.15843
AL590762.11	5.68821	5.34705	5.53687	5.02248	4.91793	5.05233	5.18794	4.92921	5.11289	5.20345	5.10125	5.1526	5.24383	5.30954	5.30954	5.29091	5.30476	5.11855	5.08888	5.35024	5.18462	4.93435	4.85387	5.18528	5.34327	5.59645	4.86647	4.69871	5.48061	5.50092	4.57641	5.01091	5.2111	5.18656	4.87638	5.82561	5.04123	4.8881	5.87319	5.43013	5.20651	5.019	4.95746	4.76413	5.83821	5.03339	5.52454	5.14375	5.92884
AL832163	2.77561	2.7044	2.86783	2.83011	2.76509	2.57776	2.60389	2.48165	2.44805	2.99489	2.74367	2.85176	2.77231	2.71224	2.76981	2.68294	2.77523	2.55322	2.54517	2.6151	2.72073	2.87767	3.06141	2.64815	2.73681	2.61427	2.6067	2.85509	3.18214	2.54458	2.94172	2.7563	2.52967	2.63014	2.65706	2.74139	2.89779	2.5433	2.79732	3.05294	2.82811	2.55203	3.08891	2.2865	2.7425	3.01715	2.6242	2.60536	3.10489
AL833181	4.12343	4.9534	4.90003	3.84441	4.21235	3.89627	4.08829	4.07864	4.00393	4.23801	4.68626	4.31622	4.23029	4.3065	4.17427	4.33379	4.1618	4.15877	4.2333	4.36535	4.22503	4.2853	4.02333	4.3568	4.09664	3.67833	4.99772	3.85496	4.51021	3.8899	4.38147	3.7261	5.19593	4.45113	5.03782	3.74514	3.87692	4.08357	4.16824	4.53624	5.39028	4.18028	4.57129	3.68943	4.02516	4.09973	4.78997	4.1447	4.1519
AL928742.12	4.72875	4.63431	4.74613	4.64717	4.81486	4.96689	4.67886	4.75434	4.76371	4.34002	4.77145	4.99812	4.88167	4.83522	4.9167	4.97106	4.94212	4.81584	4.85845	5.01563	4.82826	4.24361	4.26194	4.74069	4.76273	5.12852	4.05243	4.2695	4.34375	5.44767	4.9169	4.45565	3.72764	4.44622	4.41513	4.47799	3.755	4.88148	5.05579	5.15847	4.62696	5.22251	4.66434	5.05037	4.3981	5.39388	5.36059	5.77569	5.36059
ALAD	6.44697	6.21662	6.32494	6.49191	5.68498	6.28334	6.25003	6.58051	6.32629	6.1537	6.38333	6.30266	6.27943	6.27459	6.3266	6.18806	6.45358	6.17476	6.18165	6.16995	6.30604	5.90138	6.27202	6.0578	6.2768	6.05567	5.96022	6.62612	6.19483	5.70284	5.42131	6.41601	5.92117	6.73155	6.5437	6.56562	6.31346	5.88774	5.90401	6.55395	6.45625	5.79453	5.46916	6.09534	5.72129	6.02166	5.54016	6.85169	6.72473
ALAS1	8.85299	7.41094	9.30053	8.38511	8.04082	8.73871	8.27851	7.13905	8.42424	8.6572	8.71189	8.70308	8.52936	8.63097	8.63214	8.6584	8.63683	8.76515	8.5437	8.96451	8.62014	8.74004	8.44319	8.35452	8.63964	8.75558	8.76515	7.85628	8.16043	9.0405	10.1533	8.18757	8.16393	8.99113	7.8655	8.82671	7.4838	7.60511	8.32973	8.9706	8.71073	8.34644	8.60879	8.25531	8.19646	8.24666	7.84134	8.5486	8.45487
ALAS2	3.9329	4.24875	4.21358	3.6674	3.80793	4.09095	3.77333	4.02152	4.05681	3.79735	4.03044	4.04156	4.01656	3.79895	3.80903	3.97495	3.95502	3.95371	3.8981	4.20446	3.98455	4.04639	4.13285	3.87307	4.08103	4.30693	3.90025	3.3858	3.36847	4.36362	3.94452	4.84202	4.40787	4.03214	3.73853	4.54685	4.23695	4.21742	4.55549	3.95598	3.71644	3.5873	4.02115	3.87287	3.75057	3.91977	3.83796	4.01911	4.55935
ALB	2.62278	2.67935	3.13813	3.05647	2.95402	2.7353	2.71776	2.75076	2.66346	4.04721	2.86107	2.79178	2.81215	2.87095	2.85014	2.83332	2.83364	2.74542	2.73353	2.82841	2.8041	2.73854	2.73461	2.68639	2.78974	2.47411	2.93581	2.79479	2.57072	3.24218	2.63251	3.10233	2.8853	2.79831	2.79578	3.33861	2.86813	2.93269	3.07167	2.72144	2.84504	2.89141	2.99591	3.11242	2.63112	2.65783	2.96001	2.95338	3.26831
ALCAM	4.61725	4.10719	4.75775	5.0616	5.13787	5.88607	5.0059	5.1393	4.81731	5.13018	5.01002	4.77922	4.87935	5.19041	4.63414	4.8833	4.71424	4.97379	4.79292	4.10703	4.99878	5.00175	5.00463	5.01457	5.04182	4.39866	5.10697	5.32905	5.89366	3.95219	4.8054	4.1618	5.56876	5.52999	5.06281	4.23892	5.56024	4.78066	4.97218	4.94306	5.2902	4.63656	4.2037	4.70419	6.11835	4.97827	6.14278	5.08413	4.63098
ALDH16A1	5.5146	5.89526	6.05567	5.91389	5.06202	6.15282	5.61924	5.09975	5.46629	6.01709	6.1964	6.15558	6.05995	5.78946	5.83163	5.77382	5.91002	5.88025	5.72992	6.04776	5.80224	5.96163	6.05448	5.69045	5.89448	6.8067	6.06272	5.13081	5.72857	5.96108	5.96803	5.95841	5.34824	5.96534	5.92833	5.84288	5.96047	5.72207	6.19067	5.55927	5.38081	5.7849	5.0152	5.63792	4.83343	5.83265	5.70937	6.21532	6.03898
ALDH18A1	6.48526	5.44055	6.04691	6.78336	6.66744	6.85836	6.3465	6.48769	6.3877	6.68305	6.5234	6.64114	6.54739	6.5126	6.62681	6.53801	6.59563	6.5999	6.59453	6.76634	6.52207	6.64744	6.50879	6.42401	6.43376	6.23278	5.96946	7.47658	6.5341	6.11563	6.62681	6.60662	6.43159	5.46421	6.57168	6.10435	5.73724	6.92551	6.75773	6.45067	6.61711	6.78541	6.48769	6.54852	6.59006	6.40974	6.05044	6.22971	6.55103
ALDH1A1	5.81948	6.98365	6.23592	7.84199	6.5891	8.81067	6.78157	7.13561	7.2554	7.30202	7.29839	7.12694	6.8974	7.5732	7.52337	7.21703	7.68253	7.39344	7.50342	6.9553	7.53756	7.20335	7.14215	7.31699	7.5252	5.77667	7.55062	6.57273	7.67985	5.04461	6.09305	4.39332	5.4058	5.86499	8.00144	7.8518	7.97515	7.53756	7.94656	8.00537	7.30365	7.29562	7.02816	7.64198	7.91769	7.59829	7.96188	7.89618	7.40487
ALDH1A2	5.24383	5.18483	5.69776	5.29542	5.18528	5.94004	5.567	5.63869	5.67072	5.258	5.42131	5.78321	5.39201	5.48272	5.39275	5.50746	5.65075	5.71564	5.35807	5.51239	5.31091	5.34503	4.9538	5.47993	5.63133	5.08008	5.40648	5.16157	4.81339	4.77983	4.96965	4.88887	4.33851	4.63212	5.92965	5.72284	5.95158	5.60343	5.34802	5.63925	6.14062	5.08513	5.31615	5.53492	6.29378	5.87135	5.76586	5.31615	6.04555
ALDH1A3	5.33697	4.82101	4.44622	5.10493	4.17766	4.93265	4.80209	4.77168	4.90347	4.83167	4.57009	4.71042	5.03189	4.70318	4.9493	4.78779	4.80816	4.69457	4.79494	4.77145	4.66293	4.9169	4.88523	4.75837	4.81935	4.88946	5.35966	5.68064	4.89518	5.16471	5.81948	4.7547	4.68685	4.47432	5.16113	5.5092	4.63431	4.91604	4.89133	4.32954	4.77746	4.81731	4.82903	4.72704	4.67035	4.60834	4.42383	4.056	4.22053
ALDH1B1	4.68742	4.17874	5.34327	5.48748	4.43883	5.57432	4.89695	4.93393	5.08453	5.02693	5.12604	5.169	5.03681	4.98716	5.05469	4.97791	5.13458	4.86185	4.8835	5.10408	4.92299	4.75976	4.91628	4.68121	4.98738	5.0406	4.41613	5.42875	4.96622	5.26757	5.21915	5.06118	4.07481	4.14637	4.58063	4.89518	3.92926	5.06202	5.02453	5.17984	4.44386	5.42269	4.80209	5.35607	4.32881	5.43505	4.94871	5.64798	4.82434
ALDH1L1	5.51763	5.13356	5.47471	5.57553	5.62409	6.77965	5.65296	5.97365	5.80173	5.48361	6.01384	5.4038	5.3548	5.66653	5.91225	5.59944	5.95416	5.44055	5.68741	5.67418	6.02376	5.63969	6.06568	5.48862	5.62508	6.0099	5.40697	5.32973	5.5151	5.75123	5.42494	5.76139	6.21306	6.16115	5.66258	6.06236	5.4415	5.41108	5.6497	5.98935	5.32434	6.07802	5.08305	5.53301	4.88458	6.2585	5.40244	5.74315	5.05933
ALDH1L1-AS2	5.56999	4.89412	5.20007	4.8919	5.20583	5.49903	5.12625	4.72783	5.25669	5.12936	5.33629	5.30564	5.18154	5.35503	5.22206	5.26667	5.27082	5.20559	5.16984	5.33266	5.2146	4.98779	5.30543	5.33605	5.33917	5.18462	4.83541	4.98027	5.12478	6.21277	5.09504	5.71221	5.02389	5.81922	4.69234	5.3592	5.10339	5.02637	5.4113	5.75607	5.85224	5.44652	4.97728	4.93595	4.01694	5.29317	4.84262	5.3991	4.77687
ALDH1L2	3.28553	3.59068	3.22856	4.49756	3.62048	3.59546	3.47517	3.23077	3.51515	3.57652	3.69857	3.57583	3.71584	3.71348	3.72343	3.67325	3.64874	3.70235	3.74753	3.55861	3.68409	3.37874	3.40394	3.79213	3.70133	3.46876	2.96516	4.17894	4.04899	3.51646	3.7882	4.08321	3.68153	3.12339	3.53328	3.37049	2.60247	4.48349	3.41058	3.95795	3.71465	4.15292	3.52257	3.6066	4.05564	3.70508	3.37403	3.94474	3.04625
ALDH2	10.2528	10.7305	10.5196	10.248	10.3095	11.3149	10.4917	11.44	10.6946	10.3556	10.842	10.3136	10.3047	10.5249	10.842	10.5596	10.7999	10.6817	10.6115	10.5414	10.7855	10.6609	10.9413	10.2144	10.6006	10.9495	11.2041	10.1023	11.1624	10.0921	10.418	9.82631	10.7059	10.7718	10.8686	10.8618	11.0693	10.1223	10.758	10.718	10.2948	10.5138	9.76098	10.2299	9.94768	10.8489	10.2827	10.3961	10.6609
ALDH3A1	4.46448	5.22489	4.80639	4.03214	4.53687	4.46273	4.67342	4.59149	4.46697	4.27596	4.40286	4.79494	4.50607	4.35394	4.38672	4.40136	4.41477	4.54188	4.43318	4.66514	4.42895	4.82921	4.65988	4.56897	4.39162	5.46895	4.60031	4.87801	4.67886	5.56098	4.37565	4.40115	4.31569	5.06955	4.61378	4.46196	4.19624	4.22251	4.52807	3.93541	4.26017	4.51153	4.29578	4.69695	4.3477	4.52407	4.41686	4.4711	4.49231
ALDH3A2	7.39867	7.00295	7.537	7.94267	7.50816	8.43434	7.66173	8.00537	7.59064	7.78572	7.90338	7.811	7.5076	7.73611	7.8472	7.75819	7.91919	7.62852	7.65054	7.70134	7.71752	7.88259	7.705	7.65242	7.76948	7.57265	7.19272	8.368	7.73268	8.03007	7.06183	7.29363	7.15315	8.08772	8.23142	7.92899	7.55616	7.71958	6.97114	7.84571	7.16181	7.96032	7.42004	7.58935	7.32763	7.89036	7.28325	7.68387	7.58448
ALDH3B1	5.5077	6.10287	5.91335	5.22229	5.82085	5.4977	5.83484	5.92454	5.75255	5.567	5.64493	5.93196	5.6926	5.45385	5.50573	5.6236	5.54064	5.64722	5.59715	5.87575	5.54534	5.83776	5.76563	5.6221	5.53119	6.3912	5.66058	6.41646	5.30651	6.38985	5.36802	5.87218	5.2992	6.07772	5.51268	5.58296	5.31379	5.9862	5.82659	5.44174	5.50896	5.48482	5.28539	5.58181	5.17614	5.64346	5.23021	5.88303	5.8869
ALDH3B2	2.97361	3.34226	3.15771	2.93295	2.96257	3.08142	3.1005	3.15818	3.09191	3.09944	2.97177	3.05596	2.99972	3.02381	3.00608	3.0794	3.03615	2.98862	2.94974	3.05346	3.03694	3.1796	2.92493	2.99464	3.05491	3.01817	3.50552	3.00947	2.66971	2.85143	3.30048	3.1709	3.02909	3.29805	2.81657	3.01437	3.2461	2.82397	3.25657	3.15818	3.07803	3.10576	3.07347	2.92925	3.17855	3.42307	2.89286	3.3136	3.42744
ALDH4A1	6.72264	5.402	6.91615	6.33488	6.76098	6.64377	6.41714	6.20444	6.42293	6.26423	6.69263	6.46382	6.43805	6.43909	6.51413	6.46304	6.57135	6.44392	6.44325	6.69105	6.579	6.57683	6.39957	6.52622	6.48769	5.76218	6.74659	5.53255	6.06272	6.71752	6.79929	6.45661	6.21662	7.07711	6.28836	6.5812	6.58425	5.56185	5.8474	6.97913	6.67084	6.15897	6.29538	6.2347	6.35247	6.59263	7.05735	6.6701	6.88134
ALDH5A1	5.58347	5.01387	7.01383	5.63032	5.55974	6.2353	5.57738	4.78188	5.81272	5.66081	5.95556	5.63055	5.64798	5.94959	5.87343	5.84614	6.03309	5.77749	5.86606	5.81488	5.85822	5.65938	5.71666	5.82144	5.87135	4.97988	5.63441	6.283	5.7236	5.55299	5.32529	5.98676	6.20444	6.37211	5.85979	6.13027	5.65829	5.08118	5.11371	6.0116	5.64644	5.5151	5.51562	5.46916	5.96534	5.7849	6.13972	5.11065	5.07584
ALDH6A1	7.03761	5.92637	7.08393	6.76012	6.72591	6.13681	6.55776	6.14491	6.70794	6.59699	6.80592	6.53516	6.37925	6.75968	6.92593	6.68961	6.94726	6.75856	6.74425	6.65688	6.94031	6.59529	6.60153	6.77265	6.85754	5.5612	6.30266	6.3514	6.61601	6.2813	6.12751	6.51115	7.16236	6.83041	6.88263	7.22563	7.00197	6.40399	6.56794	7.17464	6.62023	6.99108	6.34231	6.21996	5.90254	7.17519	6.96833	6.37833	5.84461
ALDH7A1	6.39188	5.79265	6.63485	6.9567	6.11989	6.43453	6.42935	6.38333	6.45793	6.50806	6.44257	6.25003	6.37107	6.47675	6.43662	6.35528	6.49615	6.35083	6.38918	6.32629	6.28502	6.42083	6.6059	6.46304	6.41175	6.55812	6.40974	6.5503	6.91798	6.43628	5.72056	5.6497	5.62608	6.49262	6.41601	6.54593	6.53879	6.31809	5.86087	6.653	6.70891	6.32977	6.08426	6.44196	6.41048	6.43872	6.42969	6.26602	6.15806
ALDH8A1	2.87858	2.96928	3.74165	2.49606	3.497	3.0775	3.0884	2.71423	2.98371	3.6533	3.31779	3.09586	3.28578	3.08941	3.05005	3.06497	3.18616	3.04197	3.03769	2.87682	2.89867	3.15255	3.10791	3.04414	3.02269	3.48358	3.37558	4.28933	3.69639	2.85429	2.30465	4.43673	3.13783	3.00973	2.97203	2.95116	3.14974	3.78077	2.95876	3.01185	3.1988	3.91863	3.10391	2.88474	3.28905	2.8801	3.11765	2.8317	2.6151
ALDH9A1	10.5779	10.4917	10.1341	10.1619	9.66942	10.1058	10.3468	9.79296	10.4344	10.1262	10.5596	10.1941	9.95668	10.1146	10.6006	10.2349	10.5779	10.2144	10.2349	10.3182	10.3231	10.1378	10.2259	10.059	10.3182	10.7498	10.2068	10.7498	10.1301	10.1941	10.0374	9.85913	10.1854	10.6542	10.1813	10.5465	10.1023	9.77555	9.76651	10.1533	9.28795	10.9184	9.71821	9.9005	9.0405	10.9107	10.0244	10.1854	10.0274
ALDOA	11.3149	11.6452	11.6562	12.2458	11.2567	12.0464	11.6222	11.9558	11.6562	11.6804	11.7191	11.8674	11.7068	11.7068	11.7946	11.7812	11.7946	11.8792	11.6804	11.9814	11.6938	11.6804	11.6562	11.5756	11.6804	11.7686	11.9558	10.9107	11.37	12.023	12.1336	11.4093	11.3149	11.6102	11.6938	11.6339	11.5488	11.2389	11.7812	11.6804	11.8553	11.6804	12.0347	11.4745	11.5204	11.4969	12.0923	11.5204	12.2637
ALDOAP2	3.45964	4.0894	3.78077	3.35545	3.61706	3.32622	3.53471	4.38885	3.50292	3.18004	3.49527	3.66288	3.48246	3.54593	3.38995	3.62335	3.52995	3.35364	3.4513	3.40741	3.3858	3.46876	3.47895	3.43618	3.41552	4.43846	3.42941	3.06702	3.51954	3.60251	3.60641	4.08829	3.15911	3.96637	3.86783	3.02748	3.34564	3.27829	3.45241	2.8821	3.99546	3.95089	3.67624	3.77178	3.33144	3.75558	3.76657	3.2778	3.45895
ALDOB	3.677	3.84556	3.57625	3.32127	3.71465	3.59088	3.62908	3.4567	3.55023	3.76292	3.53667	3.57349	3.53084	3.4857	3.52475	3.58283	3.54225	3.56135	3.54919	3.6467	3.60411	3.76983	3.69133	3.6403	3.53368	3.88368	3.33954	3.52976	3.44584	3.81612	3.65659	3.86838	3.51255	3.55295	3.22227	3.55679	3.5628	3.24023	3.65901	3.33083	3.72988	3.85388	3.87844	3.60787	3.70733	3.56633	3.68011	3.63089	3.93981
ALDOC	8.56854	10.0782	9.03094	9.98277	8.77356	9.91299	9.4359	9.44314	9.73574	9.0467	9.43084	9.4095	9.30236	9.50345	9.30428	9.37123	9.48936	9.29583	9.16962	9.758	9.23062	9.629	9.49433	9.21305	9.41189	9.87812	10.7238	7.66304	9.18517	9.05193	9.38953	8.74744	9.21713	9.36678	9.38702	9.89034	10.1098	8.8136	9.0947	9.99347	9.47228	9.41864	9.0947	9.4359	9.18371	9.4475	9.89386	9.63967	10.1813
ALG1	4.07592	3.89902	3.98008	5.37858	4.56779	5.11922	3.98493	4.30458	4.23102	4.40075	4.84667	4.67035	4.76133	4.68938	4.6716	4.59386	4.69657	4.76291	4.50084	4.67217	4.58222	4.79928	4.83926	4.53455	4.48611	4.66128	4.47718	5.19176	5.06583	4.84185	4.32819	4.72765	4.5929	4.10933	4.64637	4.34601	4.11529	4.55097	4.19062	4.36681	4.42997	4.77625	3.90309	4.51204	4.71106	4.85498	4.33219	3.91016	4.06258
ALG10	3.67775	2.59043	3.15477	3.50376	3.44584	3.62293	3.29021	3.39676	3.44375	3.34039	3.25967	3.15501	3.21229	3.38406	3.318	3.25282	3.23236	3.52319	3.35596	3.2011	3.26378	3.21206	3.11892	3.44739	3.33061	3.03382	2.91847	3.87844	4.08321	2.90101	2.69888	3.12978	3.60094	2.5751	2.71388	3.22761	3.08989	3.48765	3.09631	3.84037	3.63488	3.65858	3.86879	3.74007	3.49038	3.63237	3.65641	3.13484	2.54765
ALG12	5.85423	6.19265	5.69595	5.22531	5.58605	5.8811	5.65075	5.90106	5.83731	5.79453	5.83484	5.96332	5.87244	5.61501	5.59786	5.71174	5.64266	5.66633	5.62827	5.92454	5.60639	6.09163	5.97281	5.74219	5.66058	6.40613	5.94388	5.44604	5.62756	5.94554	6.19669	5.18111	5.4138	6.23163	5.19609	5.76163	5.66413	5.65803	5.3572	5.48979	5.36286	5.698	5.75745	6.11622	5.53277	5.78116	5.95812	5.79239	5.51162
ALG13	6.10404	5.42783	5.98437	5.68498	6.30537	5.29386	5.90401	6.11622	5.88774	5.9068	5.90791	5.5595	6.07691	5.92749	5.82354	5.79188	5.79375	5.79051	5.95729	5.46676	5.90765	5.22886	5.24228	6.03118	5.96704	4.84424	5.12153	5.71929	6.14278	4.95499	5.38896	6.00557	6.37143	5.16858	5.6834	6.11123	6.00844	6.28164	5.95444	5.8727	5.72679	6.20073	6.34295	6.45141	6.29573	5.77247	5.79427	5.69365	4.11327
ALG14	5.62931	4.64209	4.79991	5.40468	5.17859	5.08685	5.14761	5.315	5.29137	5.44247	5.19109	5.01027	5.24616	5.02753	4.96901	4.79907	4.92176	4.97195	5.06935	4.92356	5.134	5.18953	5.48957	5.13145	5.2005	4.88503	5.50166	4.90534	5.14761	4.71781	5.37625	5.36445	5.29339	4.93495	4.98779	5.09295	5.43319	4.68406	5.00571	5.16792	5.25213	5.20431	5.41245	5.47054	5.64571	5.24423	5.02923	4.77007	3.94986
ALG2	5.89474	5.77912	5.54164	5.31592	5.61081	5.30884	5.61899	5.3387	5.64666	5.47899	5.54854	5.61156	5.54064	5.5483	5.5265	5.59495	5.60235	5.57805	5.58275	5.68715	5.63338	5.59111	5.49022	5.53228	5.63948	5.1742	5.0719	6.74628	5.80224	5.20453	5.46513	6.00297	5.62409	4.87915	5.40808	5.34238	5.48296	5.77434	5.83241	5.25452	5.74966	5.64543	5.41201	5.46095	5.75021	5.74917	5.39201	5.61575	5.5386
ALG3	6.49191	7.40487	6.72178	6.20699	6.26981	6.26815	6.46304	6.84377	6.53552	6.49797	6.76839	7.03529	6.72392	6.49438	6.64669	6.72992	6.70928	6.66409	6.62173	7.11538	6.55542	6.79595	6.6508	6.39815	6.54886	6.72473	6.41791	7.42175	6.52843	7.05177	7.46818	6.59089	6.38436	6.37351	6.67555	6.52057	6.15778	6.37619	6.91455	6.06426	6.53801	6.42228	6.74973	6.41505	6.28572	6.58201	6.36978	5.7978	6.98499
ALG5	5.23691	4.61763	4.74362	4.92159	4.876	4.87657	5.00634	5.11743	4.94669	5.13805	4.7021	4.90615	4.78066	4.76655	4.72686	4.73192	4.77551	4.67302	4.70297	4.75895	4.75736	5.18396	5.26489	4.84281	4.6661	5.08832	4.59669	5.44007	5.27594	5.02173	4.70554	5.08054	4.92779	4.64717	4.77963	4.87857	5.04398	4.77922	4.54725	4.81063	5.2587	5.15797	4.90839	4.90271	5.11151	4.91736	4.8835	4.47524	4.48955
ALG6	6.76668	5.41423	6.74772	5.82002	6.78705	5.9917	6.45661	6.73312	6.43662	6.56562	6.40873	5.99869	6.18999	6.29187	6.16901	6.17559	6.20206	6.24618	6.36522	6.15131	6.23278	6.11009	5.77492	6.06956	6.29573	5.77084	6.11331	7.07857	6.78336	6.08646	5.84493	5.76458	6.48099	5.32179	6.12863	5.86087	6.3118	6.14463	5.96163	6.36418	6.20073	6.42632	6.29957	5.87027	6.75578	6.66078	6.79353	5.63441	5.40997
ALG8	6.81885	6.14435	6.15255	6.74695	7.15541	7.05788	6.79095	6.53736	6.8127	6.71823	6.79134	6.74628	6.70456	6.69223	6.7767	6.76098	6.92101	6.85956	6.79386	6.99593	6.78084	6.78157	6.72264	6.78084	6.51413	7.05074	6.53844	7.21963	6.71945	6.39265	7.25276	6.77096	7.25276	6.26947	6.83171	6.25986	6.01838	6.8205	6.70257	6.54194	7.01993	7.32436	6.56675	6.39228	6.4699	6.69937	6.25412	6.70891	5.95812
ALG9	5.85531	6.22901	5.05489	5.94388	5.71464	6.15131	5.73433	5.95212	5.71747	6.00875	5.94472	5.74868	5.8437	5.6661	5.94125	5.82253	5.96022	5.7006	5.70136	5.70859	5.70449	6.04188	6.22485	5.82561	5.78461	5.37581	5.56024	6.00589	5.78241	5.03843	5.63663	6.93008	6.30371	5.53301	5.67094	5.59862	5.44478	6.48563	6.65233	5.43791	5.6646	5.90571	5.80121	5.53098	5.77597	5.79214	5.55024	5.74664	5.43641
ALK	4.25741	4.49324	4.11154	4.02442	3.75518	3.9755	4.11548	4.18615	4.24343	3.89205	3.9911	4.03603	4.0065	4.05243	4.08411	4.13517	4.07013	4.07744	4.09379	4.10176	4.04559	3.96654	3.92848	4.15252	4.17571	4.73035	3.67033	4.5379	3.99608	4.30632	4.48652	4.12898	4.87093	3.99324	3.76134	4.07991	4.21048	3.95006	4.26302	3.72967	3.9188	4.27988	3.92385	3.75828	3.93122	3.97912	4.2254	4.03515	4.27355
ALKBH1	5.97003	5.06222	5.96946	5.2678	5.36059	5.45609	5.62139	6.01265	5.65271	5.43295	5.26689	5.38398	5.25758	5.3184	5.36551	5.41358	5.3946	5.50119	5.36782	5.63265	5.41088	5.63739	5.4348	5.44367	5.44453	5.81685	5.70011	5.39481	5.68042	5.63515	6.10623	5.51069	5.32726	5.59167	5.31887	5.89819	5.38845	5.14035	5.15903	5.28434	5.93483	5.49815	5.61975	5.20539	5.4138	5.40977	5.75693	4.45502	4.65092
ALKBH2	5.6646	5.81408	5.48934	6.17751	5.62385	6.31537	5.93923	6.09806	5.87861	5.89795	5.77032	6.02654	5.83867	5.87244	5.75149	5.74504	5.8138	5.85898	5.77693	6.03254	5.70236	5.92576	5.93747	6.15864	5.88359	6.09656	6.22485	5.48131	6.59006	6.01811	6.21034	5.42248	5.3286	5.65517	6.25537	5.94579	6.31311	5.95353	5.54462	5.9068	5.96534	5.73459	5.62113	6.01049	5.65173	5.44367	5.98994	5.7078	5.85035
ALKBH3	6.44019	5.94153	5.6002	6.33851	6.03635	6.00297	6.04159	5.28603	5.92721	6.3269	6.21692	6.11989	6.14213	6.25659	6.16875	6.12073	6.24462	6.21124	6.15834	6.15924	6.18776	6.23975	6.54159	6.16901	6.07746	7.09808	6.30235	5.75255	6.1964	6.5341	6.29089	5.83059	5.84176	6.32529	6.19295	6.2471	6.38399	5.64091	5.5505	5.97281	5.91306	6.06848	5.75721	6.1639	6.24874	5.86447	5.89041	5.64141	5.31937
ALKBH3-AS1	3.29487	3.75424	3.43639	3.4581	3.54486	3.46724	3.46424	3.42307	3.41244	3.15382	3.50727	3.49616	3.5198	3.54182	3.60296	3.64343	3.61379	3.56549	3.51431	3.45491	3.29439	3.26953	3.04493	3.20574	3.30048	3.48972	3.79422	3.17586	2.58946	3.71605	3.73761	3.7372	3.76014	3.59637	3.42813	3.45001	3.30511	3.79681	3.4765	3.6094	3.71543	3.7191	3.87513	2.88709	3.54017	3.55445	2.66386	3.22129	3.76075
ALKBH4	5.48014	5.25213	5.64116	5.12218	5.15696	5.25582	5.11475	5.21376	5.18462	4.92779	5.32229	5.37089	5.33202	5.24733	5.32043	5.36825	5.25625	5.23542	5.13521	5.53301	5.17288	5.60568	5.48726	5.46217	5.34615	5.33848	5.93168	5.0059	5.26293	5.52701	5.57859	5.38199	4.99376	4.46621	4.99667	5.57553	5.36976	4.68044	5.03295	5.03656	4.89334	5.26132	5.09975	5.22361	5.40905	5.67622	5.51093	5.16305	5.82144
ALKBH5	7.29363	7.27257	7.46099	7.8383	7.62431	7.74291	7.4659	8.05425	7.61081	7.5989	7.60575	7.66563	7.57265	7.47481	7.55616	7.58012	7.51534	7.60575	7.53224	7.75741	7.63479	7.54398	7.23075	7.39004	7.49398	6.39507	7.49994	6.95466	7.22164	7.29726	7.58739	7.1527	7.19322	7.0854	7.50702	7.63686	8.04162	7.63053	8.06735	7.62164	7.56358	6.94289	7.73611	7.53881	7.71151	7.34906	7.78642	7.69189	8.33254
ALKBH6	5.14127	5.85395	5.6316	6.40132	5.34349	5.96278	5.65271	5.95933	5.61501	5.74715	5.73123	5.72857	5.73072	5.72782	5.64571	5.71537	5.68573	5.83999	5.72937	5.90106	5.74054	5.64898	6.13709	5.52025	5.65887	7.02207	6.15006	5.0788	5.86357	5.25412	5.6522	5.36976	5.40648	5.80425	5.80699	5.58275	5.65602	5.26896	5.14461	5.63543	6.03663	5.51434	5.74244	5.90106	5.85277	5.94879	6.22162	5.96393	5.87836
ALKBH7	6.68305	6.39815	7.04467	5.89395	6.27013	6.25039	6.35465	6.30199	6.29573	6.31876	6.42575	6.6493	6.53302	6.36522	6.3521	6.39744	6.4068	6.42463	6.37619	6.69818	6.40843	6.46558	6.51115	6.50451	6.37014	7.42928	6.55211	5.62409	6.35997	6.89508	6.66038	6.1461	5.77749	6.63243	6.08215	6.21124	6.07516	5.86389	6.5395	6.56085	6.44697	6.14519	6.68221	6.63373	6.27366	6.22807	6.0303	6.45358	6.69774
ALKBH8	4.92941	3.79332	3.85922	4.93636	5.2111	4.69539	4.63757	4.56609	4.62675	4.60815	4.47133	4.09095	4.47919	4.6017	4.5767	4.51644	4.44481	4.55171	4.58081	3.87984	4.64738	4.32436	4.28235	4.79251	4.6093	4.05658	4.31605	4.80209	4.77881	4.27635	4.16164	4.39398	4.31827	4.10758	4.88458	3.78779	4.13208	4.51726	4.0807	4.79494	4.9382	5.06118	4.81672	4.87518	5.80802	4.28365	5.53492	4.05583	3.90341
ALLC	3.6467	4.08184	3.2776	4.08658	3.4706	3.75991	3.6142	3.48226	3.76054	4.10157	3.78557	3.81843	4.00981	3.39372	3.53143	3.36866	3.47363	3.74774	3.71724	4.05734	3.74165	3.67522	3.55405	3.67937	3.74712	4.49819	3.91429	3.12645	3.61476	3.85424	3.89736	3.80185	4.14037	4.12881	3.4756	4.2178	3.66992	3.55871	4.10429	3.70409	3.50552	3.68864	3.85496	2.91803	3.22885	3.39325	3.84384	3.50038	4.08205
ALMS1	6.31311	5.97003	5.76218	6.04806	6.68505	5.79102	6.40509	6.51223	6.24279	6.21373	6.05186	6.04776	6.00642	6.00127	6.0801	6.04604	6.01049	5.98111	5.96587	5.81299	5.97395	5.99138	6.12439	6.19265	6.02739	6.48601	6.26321	6.59047	6.48563	6.16237	5.92807	5.84518	6.6826	7.09911	6.05326	5.90369	6.12501	6.29411	5.57607	5.98834	6.05326	6.099	5.61599	6.18776	6.14153	6.0179	6.23403	5.73998	5.65399
ALMS1-IT1	3.3351	2.72001	3.36502	3.61171	4.05492	3.21275	3.38782	3.10576	3.14359	3.45938	3.35619	3.25114	3.38605	3.33906	3.33784	3.34539	3.33954	3.15699	3.19508	3.22081	3.31041	3.63568	3.50147	3.27829	3.33103	3.59135	2.58526	3.35659	3.32622	3.1636	2.90423	3.24147	3.55043	2.9405	2.98292	3.34761	3.42307	3.47187	3.14905	3.63884	3.25807	3.26953	3.32575	3.65819	4.09076	3.26111	4.06489	3.12042	2.99223
ALMS1P	3.15028	4.37304	3.96585	3.70799	3.77375	4.04116	3.52374	3.3463	3.48482	3.68846	3.83167	3.93762	3.87151	3.82659	3.83317	3.89682	3.80676	3.85809	3.96753	3.89571	4.02462	3.98714	4.00665	3.5369	3.82086	3.79619	3.58937	3.5898	4.06734	3.95698	4.86895	3.46076	4.43151	3.92926	4.3324	3.34586	3.97495	4.08792	3.98606	3.70591	3.72362	3.52214	3.83933	3.31824	3.61048	3.72667	3.34921	3.81534	4.09224
ALOX12	3.40991	3.14801	3.69333	3.88834	3.68769	3.09168	3.58048	3.41913	3.81493	3.14775	3.46993	3.55782	3.54525	3.43175	3.54293	3.49251	3.54463	3.28142	3.19531	3.27806	3.34105	3.36335	3.25783	3.56259	3.35638	4.34903	3.60831	3.92199	3.37248	3.49143	4.13891	3.72689	3.50481	3.61255	2.7382	3.59348	3.4796	3.45025	3.37336	3.36782	3.56464	3.328	3.06338	3.19488	3.57939	3.29183	3.53667	3.10576	3.88541
ALOX12B	3.95833	3.7261	4.20518	3.57077	4.15515	4.075	4.13659	4.25725	4.16396	3.64386	3.84089	3.93232	3.90713	3.72514	3.94357	3.94056	3.85214	4.04358	4.04358	4.1791	3.76411	3.92792	3.66759	4.097	3.94474	4.73092	4.08449	3.35172	3.3199	3.96524	4.10611	4.18403	4.07846	4.15857	3.20906	3.84148	3.98568	4.1634	4.09681	3.90025	3.74594	4.44752	4.31031	3.76154	3.41528	4.40154	4.46862	4.24625	4.08829
ALOX12P2	4.82642	4.8086	4.85042	4.24123	4.48495	4.74463	4.60596	4.60695	4.54108	4.71444	4.54607	4.85145	4.65816	4.53532	4.63378	4.63251	4.69811	4.51077	4.52846	4.89809	4.5239	4.37549	4.441	4.65477	4.69871	4.39128	4.63075	4.05094	4.16532	5.22462	5.18882	4.32365	4.52527	5.01541	3.94968	5.16922	3.99753	4.63656	5.05317	4.46371	4.07725	5.0626	4.70758	4.25399	4.24782	4.90985	4.88065	5.44889	5.2678
ALOX15	4.35323	5.24639	5.48841	4.33048	4.7978	5.31425	5.66952	5.44199	5.53993	5.24866	4.09844	5.56401	4.90249	4.17132	4.4997	5.15718	4.55475	4.48407	3.99029	5.51093	4.74573	6.26575	4.74362	4.79311	4.47563	6.11418	4.2474	7.24757	5.72525	6.07952	3.91828	5.27682	4.32109	5.84104	5.07429	5.61156	4.19641	5.78037	4.10933	4.50394	4.43981	4.99504	4.42592	5.0551	4.32512	5.46987	4.43209	4.75933	4.1223
ALOX15B	3.38913	4.20944	4.37066	3.90813	4.02387	4.09716	3.89571	3.76391	4.10196	3.58426	3.9491	4.01082	4.16416	3.86132	3.92808	3.97625	4.00117	3.84441	3.90046	4.18352	3.96899	3.73168	3.76292	3.97769	3.99697	3.78726	4.2943	3.78077	3.61255	4.1575	4.22015	4.45502	4.93003	4.11637	3.84809	4.44155	4.12169	3.544	3.98696	3.48203	3.5019	3.72884	3.87494	3.61476	3.77256	3.50899	3.62844	4.0187	4.11006
ALOX5	4.86524	4.99514	4.19407	4.82574	4.57806	4.42146	4.52214	4.70162	4.51644	4.8054	4.93698	4.86955	4.79251	4.79661	4.71801	4.68181	4.57129	4.79597	4.83167	4.81149	4.80961	4.91918	4.76392	4.74182	4.56647	4.29355	4.99421	4.36868	5.34615	4.41328	4.17406	4.52122	4.71002	4.1584	4.74323	4.12801	4.79863	4.90307	4.89893	5.28502	5.25521	4.69987	4.63251	4.64981	4.1933	4.71444	4.40075	5.09951	5.2757
ALOX5AP	6.09192	6.58086	5.93664	6.40774	5.432	5.24999	5.58181	4.81207	5.73179	6.48601	6.35309	6.24462	6.26512	6.47364	6.39574	6.1431	6.12863	6.28102	6.23127	6.38098	6.47675	6.50774	6.33685	6.27747	6.08237	5.37944	5.07251	6.03198	5.83776	5.68892	4.37821	5.9984	5.56253	5.43013	5.80224	6.75141	6.14911	6.40263	5.59464	7.01437	6.38436	7.00734	6.27175	6.67872	5.67941	6.58971	5.31268	6.95358	5.41622
ALOXE3	3.80423	4.2134	3.48268	3.89934	3.65353	3.67833	3.73168	3.95389	3.76819	3.5959	3.76352	3.88154	3.80071	3.66862	3.65984	3.81168	3.75695	3.65698	3.66064	3.83227	3.73364	3.90832	3.8717	3.71584	3.61512	3.48093	3.70932	3.20348	3.81704	3.85123	3.82124	4.78779	3.52655	3.81474	3.88696	4.41227	4.0248	3.81113	3.89241	3.35338	4.06036	4.07216	3.74535	3.92534	3.68943	3.78968	3.45491	3.67504	3.92049
ALPI	4.2333	4.63737	4.07303	3.79599	4.28718	4.01633	4.10951	3.97064	4.05863	3.91092	4.23196	4.25596	4.27355	4.15024	4.19569	4.16864	4.27076	4.25272	4.24911	4.38826	4.16737	4.12862	4.15455	4.19888	4.13458	3.75576	4.28459	3.6413	4.44347	4.27596	3.75887	4.28846	4.02277	3.90147	3.6674	3.98455	3.1389	4.33411	4.18008	4.33612	4.2803	4.06096	4.16198	4.65736	4.23102	4.1097	4.05564	4.67199	5.14761
ALPK1	4.80659	5.24956	4.65816	5.09869	5.25758	4.92715	5.05786	5.14461	5.05765	4.86895	4.92319	4.99085	4.91954	4.89579	4.85869	4.88966	4.87559	4.92497	4.92558	5.00755	5.11787	5.07429	5.14874	5.09675	4.9507	5.97195	4.99524	5.10871	5.23994	5.08453	4.83945	5.14961	5.23932	5.53172	4.98416	4.62261	4.84005	5.37212	4.71329	4.99376	4.88311	5.27387	4.84958	4.97888	4.45601	4.78896	4.76493	4.89051	4.98393
ALPK2	8.96766	10.37	8.72561	9.0467	9.65569	9.1319	9.66123	9.46204	9.48709	9.15979	9.19714	9.0259	9.14999	9.19714	9.05855	9.54621	9.12857	9.31915	9.37123	9.36025	9.27536	9.59612	9.3758	9.51298	9.10338	9.39625	9.32144	8.68314	8.57457	8.94519	9.13386	10.1697	9.68708	10.239	8.93617	9.08078	9.41614	8.78022	8.45269	9.42119	9.21713	9.44512	9.47489	9.3148	9.05193	9.25046	9.18371	10.2695	10.5304
ALPK3	7.01479	7.01259	7.51964	8.30132	7.74966	8.30022	8.02757	8.1381	7.67911	7.95555	7.88869	7.63167	7.68116	7.58504	7.90004	8.02924	7.85841	7.75117	7.725	7.83002	7.72701	7.89478	7.8081	7.86644	7.63896	7.33161	7.90808	7.42063	7.18542	8.06467	8.15869	7.71151	8.29628	8.50454	8.01285	7.32709	7.85628	7.56501	7.74769	7.32709	7.87947	7.59064	8.29734	7.49464	8.03007	7.44055	7.81836	7.41495	7.62617
ALPL	4.23252	4.84784	4.12881	4.15418	4.19407	4.41328	4.06242	3.76213	4.05618	3.90847	4.53569	4.35759	4.49099	4.22412	4.43825	4.40249	4.37304	4.79863	4.49286	4.55171	4.30575	4.48631	4.30922	4.40423	4.17279	3.76352	4.18271	3.92632	3.71292	4.36232	4.85103	3.64152	4.0432	3.55148	4.92779	4.60815	4.85226	4.36956	5.10451	4.32937	4.51707	4.3862	4.26809	4.42569	3.74494	4.31789	4.0668	4.77294	4.4311
ALPP	3.91587	4.2758	4.0988	3.71073	3.62726	3.3358	3.6674	3.84618	3.88154	3.75203	3.8355	3.91918	3.80459	3.84384	3.88814	3.95955	3.88876	3.70591	3.6849	3.86726	3.90515	3.64915	3.77215	3.70855	3.76391	3.58817	3.45582	3.27431	3.59763	3.93524	4.9652	4.22741	3.62726	3.77057	3.6849	3.76448	3.81394	3.89376	4.16109	3.44331	3.95537	3.59046	4.22686	3.98069	3.45323	4.16109	3.8767	4.1299	4.33651
ALPPL2	5.18375	6.07144	5.53046	4.89247	5.00936	4.92655	5.39224	5.58474	5.31793	4.93863	5.18509	5.41622	5.29114	5.21985	5.24932	5.34238	5.43617	5.22953	5.23436	5.50946	5.23045	4.92779	4.84506	5.0858	5.19132	5.43841	5.11065	4.21396	4.55621	5.65493	4.76614	5.3572	4.87638	5.55571	4.84185	5.41178	5.04666	5.08787	5.80481	5.35245	5.09633	5.2389	5.18111	5.75413	4.91274	5.03968	4.94344	6.16051	6.22868
ALS2	5.5605	4.69811	4.69833	5.08262	5.04544	5.17371	5.2146	4.44715	5.0976	5.27724	4.87214	4.79039	4.84303	5.04163	5.03843	4.95641	5.03443	5.08095	5.04082	4.96795	5.01002	5.02266	5.10078	5.11017	5.12805	4.79679	4.85517	5.32883	5.05685	4.19984	4.92395	5.67576	5.39693	4.6764	4.9469	5.26465	4.90307	4.87257	4.77589	4.87657	5.36528	5.1433	4.94088	5.57142	5.55418	4.93971	4.97338	4.67035	4.11366
ALS2CL	5.81845	6.69382	6.32279	6.23975	5.64921	6.2079	6.15589	6.49651	6.18999	5.97195	6.09047	6.21069	6.11835	6.03309	6.05103	6.15531	6.08399	5.99636	6.06272	6.28006	6.11418	6.08788	6.36667	6.10198	6.15649	6.42437	6.57347	5.02597	5.59267	6.57305	6.49262	6.02458	5.82952	6.39338	6.07665	6.10916	6.16237	5.57759	6.53844	6.2375	6.5891	6.09481	6.27202	6.12778	5.69341	6.28469	6.23716	6.58239	6.55067
ALS2CR11	2.75294	3.28418	3.43595	2.86165	3.0087	2.91707	2.96117	2.90566	3.08342	3.0946	2.95059	2.90566	2.95542	3.05779	3.05966	3.10604	2.95854	3.08443	2.97788	2.96257	2.99668	2.99846	3.00973	3.06777	2.90864	3.13935	3.10518	2.87767	3.25657	3.03958	3.3335	3.06727	2.89255	3.32127	3.4209	2.82237	2.62558	2.91087	3.01548	2.86813	3.54162	3.20506	3.22833	2.84182	3.63743	2.98075	2.93434	2.91024	2.97463
ALS2CR12	4.34863	4.83391	5.31863	4.07777	4.82158	4.04997	4.21935	4.12416	4.37339	4.75101	4.38052	4.46767	4.31147	4.65132	4.75677	4.87758	4.71125	4.67999	4.55603	5.0152	4.66412	4.43469	4.47469	4.19045	4.84242	4.30292	4.22148	3.32647	3.92217	3.96101	4.63811	4.736	5.65296	4.68366	4.60211	4.54171	4.6736	4.3881	4.14369	4.96376	4.11838	4.66998	5.13458	4.14056	5.45938	4.82214	4.56185	5.09398	4.84646
ALX1	4.54365	4.6112	4.28756	3.80846	3.96505	4.06734	4.13517	4.55441	4.18028	4.20122	4.08976	4.13382	4.01948	4.16961	4.28365	4.22612	4.24625	4.03044	4.0526	4.31622	4.08049	3.9855	4.17685	3.97609	3.87232	5.25069	4.38847	3.87586	4.44228	4.14526	4.31676	4.28992	4.28549	4.42592	4.43691	4.17427	4.34272	4.06472	4.66866	3.96294	3.62006	3.8113	3.74378	3.81762	4.54811	3.75015	4.02572	4.16789	4.74224
ALX3	4.14675	4.92281	5.02597	4.21103	4.75066	4.52711	4.79558	5.75982	4.77274	4.29469	4.28417	4.50746	4.3587	4.1129	4.28604	4.29765	4.33907	4.37304	4.39235	4.72153	4.49874	4.90939	4.8025	4.50627	4.54483	4.7984	4.79661	4.244	3.99069	5.33288	4.53532	5.10205	4.67867	5.14503	4.48516	4.46117	4.82782	4.63312	4.75635	4.30671	4.10069	4.45767	4.71505	4.43578	4.49215	4.51531	4.40752	4.80135	4.98656
ALX4	3.9455	4.71689	4.55264	4.70439	4.04265	4.19136	4.43151	4.45239	4.36093	4.3508	4.24518	4.22466	4.27005	4.34934	4.37398	4.40562	4.37084	4.33558	4.30732	4.47935	4.26931	4.07923	4.10256	4.09095	4.37821	3.83933	4.31409	3.68526	4.42642	4.12476	4.6593	4.22503	4.9963	4.3508	4.08357	3.92217	4.37973	4.53606	4.24479	3.83284	3.92513	4.65331	4.88542	4.51783	4.73411	4.82987	4.25853	4.48965	4.8829
ALYREF	6.64073	6.05243	6.74304	8.16725	7.17021	7.68841	6.38954	6.70495	6.40974	7.41602	7.31015	7.47589	7.36189	7.37101	7.28377	7.22563	7.25894	7.42004	7.2361	7.48618	7.21146	6.76739	6.71669	6.83971	7.29268	4.57272	6.13681	6.45793	7.0361	6.09656	6.77096	6.57683	6.88708	4.93971	6.8878	7.08144	6.87921	7.37387	7.87525	8.07498	7.06835	7.61539	7.62617	8.03994	7.28003	7.811	7.58739	7.672	7.28781
AMACR	4.18913	4.08957	3.8066	3.5628	3.70967	3.91092	3.78257	3.6463	3.8359	3.92495	3.9119	4.01828	3.90229	3.81946	3.81801	3.8351	3.82009	3.7195	3.75673	3.83875	3.73484	3.84984	3.79025	3.73145	3.78419	4.11172	3.48316	3.47497	4.05377	3.9188	3.72179	3.97101	3.85884	4.4504	3.56385	3.59637	3.06575	3.74063	3.6503	3.97787	3.65241	3.99216	3.98139	3.89646	4.07013	4.08261	4.02003	3.75138	4.05056
AMBN	4.04606	3.8856	4.4848	3.71746	4.4019	4.25833	4.00631	4.05436	4.13839	3.79972	4.20103	4.37398	4.19713	3.99947	4.15438	4.10196	4.16697	4.19789	4.1447	4.38488	4.21358	3.73874	3.97138	3.86331	4.07846	3.69836	5.18198	3.93559	3.67504	4.50944	4.95255	4.74752	4.2655	4.53128	3.61189	4.63616	4.33198	4.18271	4.02702	3.45285	3.45559	4.31213	4.19045	3.99643	3.58857	3.49417	4.1791	4.35217	3.92828
AMBP	4.0957	4.67999	4.12476	4.10449	4.23657	4.58816	4.26362	4.65092	4.34111	4.42513	4.2258	4.34036	4.24256	4.13641	4.13839	4.22972	4.1557	4.21483	4.22321	4.36328	4.25458	4.3501	4.45601	4.10719	4.3534	4.34973	4.4766	4.23009	4.20736	4.52846	4.27672	3.92475	4.35307	4.21857	3.96734	4.07034	4.27651	4.30292	4.61236	4.26093	3.76292	4.42249	4.66591	3.80459	4.52907	4.26623	3.99947	4.31409	4.77028
AMBRA1	4.59386	4.41268	4.23368	4.89334	4.35624	4.88167	4.44445	4.47036	4.49699	4.71707	4.45901	4.51002	4.41036	4.51644	4.48955	4.54345	4.52884	4.5835	4.42834	4.52732	4.50341	4.72424	4.68823	4.60715	4.66886	4.2059	4.39673	4.8206	4.56897	4.71042	4.83614	4.3619	4.48917	3.99051	4.57107	4.21307	4.5206	4.48798	4.76291	4.40498	4.70943	4.49194	4.39315	5.01821	4.68685	4.63115	4.50413	4.43595	4.94173
AMD1	7.66627	6.88668	8.13537	7.21353	7.47116	7.86263	7.70288	7.85255	7.69387	7.41495	7.52092	7.33586	7.52275	7.72905	7.57008	7.5732	7.54802	7.63291	7.62665	7.41898	7.69255	7.4742	7.31923	7.44119	7.57655	6.50745	7.17317	7.67648	7.95091	7.06653	7.02683	7.38778	8.10942	6.59006	7.73192	7.56121	7.9633	7.97613	7.32143	7.78066	8.02039	7.43107	7.42689	7.79338	7.59434	7.88102	8.2903	7.41841	7.27474
AMDHD1	3.97954	3.71665	3.18359	3.5019	3.74081	3.39811	3.51168	3.28258	3.5176	3.5712	3.8217	3.4581	3.48482	3.65114	3.34394	3.62787	3.52697	3.62787	3.59842	3.44849	3.44919	3.4933	3.59246	3.97388	3.36082	3.73423	3.25612	4.13659	3.84984	3.46552	3.21026	3.89951	3.04414	3.96654	3.38065	3.10631	3.65836	3.30193	3.36782	3.7479	4.28494	3.44464	4.10774	3.90169	4.00922	3.16698	3.29688	4.05734	3.27552
AMELX	2.85659	3.08168	3.44398	2.82103	2.72915	3.3033	3.04197	3.66188	2.83364	3.07424	2.90222	2.87621	2.96984	3.02511	3.05112	3.06727	3.10763	3.09141	3.0819	3.09944	2.98542	3.09342	3.00469	2.76368	3.11016	3.06313	3.30424	2.36629	3.20159	3.17934	3.28505	2.94588	3.19901	2.86472	2.6477	3.376	2.71535	3.51515	3.22257	2.84211	3.18743	3.16281	2.75915	3.19165	3.60431	3.04576	2.80215	3.21824	3.31735
AMELY	3.92828	4.61138	3.89259	3.83373	4.14658	4.07707	3.95778	3.81002	4.01694	3.89497	3.98249	4.12621	3.98586	3.99531	3.91508	3.90939	4.01506	4.11401	4.10103	4.22377	4.05791	4.11417	4.15309	4.06373	4.04414	4.13362	4.02894	3.59046	3.50018	4.3877	4.04899	3.90063	4.08638	3.93904	3.66288	4.23836	4.75995	4.43808	4.73611	3.84618	3.78359	3.71665	3.59326	3.74475	4.19312	3.87077	3.91769	4.45954	4.53378
AMER1	3.40104	4.01333	4.25741	3.91092	3.89774	4.20813	4.08695	3.50331	4.242	3.66384	3.87383	3.89967	3.80148	3.68569	3.79895	3.82925	3.85612	3.84752	3.74846	4.0776	4.09129	3.9566	3.75518	3.70713	4.09076	3.68072	4.18197	2.96984	3.47275	4.36868	3.8856	3.5198	3.56259	4.03027	3.8355	3.8573	4.1272	4.50861	4.25004	3.43812	4.30458	3.5779	3.67052	3.87269	4.09341	3.38889	4.1666	4.33523	4.50571
AMER2	3.4133	3.24707	3.50985	3.25921	3.63992	3.39437	3.40809	3.49677	3.39414	3.63884	3.28953	3.2799	3.28348	3.35196	3.32289	3.32127	3.33144	3.26378	3.25899	3.29572	3.28258	3.72514	3.72382	3.44092	3.29164	3.72884	3.56735	3.26326	3.53911	3.40217	3.58069	3.44092	3.56322	3.39676	3.077	3.52019	3.4619	3.42921	3.24147	3.36598	3.19075	3.70387	3.51646	3.46459	3.53123	3.43595	3.12571	3.44069	3.56403
AMER3	3.98122	3.87474	4.0822	3.98658	4.42441	3.83796	3.90534	3.93251	3.98341	3.98658	4.02499	4.10611	4.01616	4.01121	4.0087	4.03678	4.03458	3.96822	3.99233	4.07725	4.0122	4.0484	3.96861	4.00026	4.08162	4.27005	3.93193	3.78911	3.93867	4.2474	3.84106	4.44736	3.70652	4.41328	3.52614	4.10466	3.74846	4.26155	4.46523	3.69658	3.91448	3.89664	4.29615	3.84889	3.70634	3.94722	4.04721	4.17992	4.35661
AMFR	6.0578	5.89366	4.68685	6.65653	6.9033	6.09869	5.69313	4.98067	5.89845	5.62409	5.51139	6.43769	6.43839	5.48225	6.25986	6.20108	6.20605	6.33456	6.30052	6.26159	6.50916	6.26911	6.04691	5.91087	6.26746	4.96147	4.73192	5.92668	5.86943	5.91487	6.19702	4.60453	4.94212	6.04445	6.283	4.96945	4.71229	6.66192	6.67243	4.77028	4.70859	6.53583	6.5562	6.28599	6.34553	7.13046	6.95086	6.42293	6.09961
AMHR2	4.736	5.86805	5.34753	4.96945	4.95621	5.00552	5.36376	5.16668	5.3592	4.974	4.97195	5.20281	5.07299	5.03635	5.15884	5.18882	5.22531	5.07054	5.01717	5.39028	5.16113	5.26619	5.23521	4.85701	5.04647	5.90196	4.78385	5.12723	4.95321	5.64091	5.1745	4.62657	4.49029	5.44453	5.1694	4.96067	4.73538	4.99832	5.1902	4.55025	5.31475	5.16389	5.20259	5.15759	4.81542	5.33651	5.21376	5.72656	5.8566
AMICA1	5.3882	5.67026	5.42515	5.83432	5.74315	5.62069	5.53882	5.1709	5.3313	5.93312	6.07829	5.93137	5.75982	5.80224	5.86473	5.69511	5.77516	5.64493	5.92336	5.87294	5.65493	5.9251	6.13121	5.75664	5.70937	5.62855	5.69723	5.16222	4.95234	6.1017	5.39182	5.25961	5.28813	5.97421	6.0852	5.20866	5.39436	5.895	5.41924	6.25818	6.11768	6.73552	5.95104	5.91627	4.9671	5.61694	4.64738	6.21004	5.89927
AMIGO1	6.31248	6.44775	5.87654	5.77886	6.21155	6.35997	6.27366	5.26757	6.15558	6.09245	6.13089	6.24218	6.19764	6.00616	6.2388	6.31601	6.16961	6.04246	6.10589	6.40974	6.15531	6.59595	6.41753	6.20745	6.12409	6.86642	6.81198	5.95729	6.00965	6.29671	6.00524	6.46415	6.34776	6.82869	6.25886	5.88191	5.67121	5.56526	5.29542	5.72028	6.02832	5.42424	6.01811	6.29378	6.17353	6.05599	6.08122	6.37073	6.92807
AMIGO2	6.96057	5.55905	6.73676	6.76267	6.72915	7.79034	6.74464	6.96141	7.31757	7.15981	6.81198	6.43079	6.92335	6.95712	6.89461	6.64593	6.85289	7.10675	6.96321	6.17353	6.80344	6.47605	6.17805	6.86598	6.85447	6.54055	8.55916	6.76135	7.95232	6.49902	7.62228	5.11577	6.35373	5.40333	7.39115	6.5234	7.51785	6.42764	7.06601	6.78541	6.93764	6.54774	6.77965	7.15541	7.86056	7.26112	7.4742	6.00269	7.129
AMMECR1	4.43169	3.68031	3.79798	4.30031	4.45626	3.58691	4.10466	3.79619	4.02423	4.14369	4.02721	4.12493	4.12437	4.16455	4.02611	4.09095	3.98475	4.2351	3.99571	3.74456	3.98622	4.34243	4.06277	4.04002	4.00117	4.68841	3.67072	5.09566	4.40385	4.03458	3.59842	4.29884	4.51896	4.15895	4.04414	3.65984	3.88026	4.3611	3.84459	4.05224	3.724	3.95185	4.02349	4.22129	4.30846	3.96804	3.85178	3.52995	3.56114
AMMECR1L	6.76591	5.98255	7.04797	7.1892	7.40045	6.76301	7.07363	7.5087	6.85664	6.87571	6.7931	6.54952	6.78157	6.85447	7.00694	6.78379	6.93543	6.872	6.93804	6.73598	6.91364	6.67283	6.76634	6.63823	6.79265	6.9	6.75297	7.93431	7.50288	6.59563	6.70095	7.32202	7.35335	6.80707	7.09486	6.82538	7.07997	6.8736	6.71634	6.81598	6.97463	6.6272	6.03309	6.97114	6.80428	6.65377	6.70816	6.11361	5.94277
AMN	4.62222	4.87397	5.10318	4.27874	4.85845	4.72333	4.75933	4.75714	4.78463	4.70779	4.67017	4.86103	4.74158	4.66535	4.70162	4.72742	4.74859	4.59688	4.68121	4.77215	4.70439	4.76934	4.78567	4.7535	4.58758	5.15569	4.68406	4.41477	4.46157	5.08622	4.4997	5.65425	4.92438	4.61338	4.31257	4.56664	4.34885	4.55136	5.12604	4.36396	4.433	4.78642	5.051	4.99124	4.64149	4.65636	4.70383	4.80519	5.14981
AMN1	6.40334	6.21277	6.51334	5.27767	5.90369	5.58275	6.11215	6.14549	6.20478	6.07407	5.74995	5.5969	5.90627	5.88914	5.76481	5.76667	5.78349	5.77492	5.93253	5.60589	6.00072	5.77597	5.78219	6.05356	5.96047	5.29764	5.80963	5.43693	5.52675	5.74268	5.45584	5.91874	6.0179	6.19516	6.10887	5.63925	5.51736	5.49139	4.89871	5.87775	6.15897	6.22162	6.34393	6.31674	6.73864	6.11835	6.3521	5.72028	5.24846
AMOT	3.18337	3.60856	3.49015	3.59975	3.37515	3.97388	3.37558	3.25166	3.33372	3.53454	3.43347	3.41798	3.37515	3.54571	3.50292	3.53996	3.47255	3.49481	3.39966	3.35149	3.28756	3.84556	3.9008	3.57812	3.36264	3.32873	4.28144	3.60983	4.38885	3.12929	3.16546	3.36106	3.59348	3.2615	3.63531	3.14974	3.61986	3.2837	3.30698	3.56843	3.27552	3.10181	3.27369	3.78655	3.78478	3.59177	3.57599	3.31875	3.59614
AMOTL1	5.83836	6.00844	5.54557	6.31382	5.95584	6.22255	6.06605	6.12687	6.11009	5.85635	5.97835	6.03663	6.08399	6.02739	5.97395	6.02561	6.09219	6.11563	5.97665	6.27265	6.00414	6.17316	6.11835	5.91564	6.04776	6.18259	5.61794	6.07352	5.74789	6.03781	6.35587	6.64525	6.45625	5.90924	5.80247	6.16299	6.11902	5.94096	5.90765	6.09627	5.42515	5.67256	5.59167	6.45823	6.01049	6.11682	5.5899	6.62322	6.39375
AMOTL2	8.11729	8.10942	8.23891	7.9641	8.2177	8.94377	8.80527	9.39625	8.47698	7.82718	8.28448	8.3564	7.93204	8.14655	8.58892	8.16214	8.41022	8.31022	8.16214	8.43541	8.60107	8.00955	7.53406	7.94351	8.34069	8.40572	7.00694	9.72975	8.32876	8.43641	7.70947	8.08683	7.5105	9.17139	8.69117	8.85871	8.23514	8.45788	8.53279	8.61737	7.67515	8.26456	8.08424	9.10517	8.65463	9.02238	7.91404	8.09274	7.45315
AMPD1	4.34934	3.56006	3.57144	4.04156	3.4209	3.78637	3.4042	3.47895	3.36455	3.28733	4.47955	3.82266	3.56945	4.04997	3.53826	3.52513	3.5867	4.08028	3.54336	3.70672	4.73271	4.01753	4.38979	3.55169	3.84342	4.14141	3.60597	3.6627	3.15892	3.31403	3.82285	3.2819	4.01674	3.62069	3.5134	3.89967	4.3044	3.2004	3.37289	4.98393	3.44981	4.61725	3.36598	3.6413	3.25807	3.77855	3.41913	5.19333	4.25518
AMPD2	5.78549	5.46394	5.90765	6.75257	6.36252	6.19516	6.05599	6.44595	6.05868	6.20635	6.13903	6.21155	6.36314	5.92691	6.11936	5.88218	6.09133	6.2222	6.18041	6.31382	6.11656	6.31137	6.49833	6.08551	6.02536	7.09271	6.23716	6.49328	6.49295	6.76703	6.28993	6.18873	6.12751	6.6942	6.28535	5.80048	5.97586	6.00816	5.97003	5.86473	6.11835	6.46065	6.08815	6.05868	5.96449	6.04386	5.34038	5.80098	5.74586
AMPD3	5.58831	6.55999	5.83509	5.22009	6.2672	6.36522	6.02773	5.82029	5.93717	5.80642	6.10977	6.21843	5.79131	6.06426	5.86721	5.97056	5.72807	5.85689	5.83562	5.88025	6.12687	6.27804	6.24434	5.83086	5.95556	5.80224	6.20351	6.21463	6.25986	5.41469	5.6382	5.61054	5.98644	6.11444	6.20937	5.83509	5.95076	6.00102	5.6236	6.44666	6.98046	6.3514	5.74715	5.68498	5.43013	5.23542	5.19482	6.12929	6.19892
AMPH	6.67403	7.10559	5.38421	6.73347	6.37484	4.67982	6.52276	5.42993	6.20763	6.29538	5.74504	5.95045	6.02623	6.11418	6.15072	6.40906	6.37619	6.16688	6.20505	6.65965	6.07575	6.54952	5.67256	6.02483	6.17975	5.72656	4.92541	6.51084	5.2701	5.89689	5.00235	6.88708	5.91225	7.84649	5.99985	7.14426	6.8127	6.81849	5.38465	6.68071	5.53172	6.02104	4.91474	6.62901	5.94153	7.65384	6.61327	6.16355	5.10385
AMT	7.705	7.89113	8.22847	8.257	8.08424	8.71189	8.3259	8.14655	8.23327	8.13624	8.16471	8.07303	8.19454	8.06212	8.18043	8.21135	8.07498	7.92237	8.02671	8.46127	8.05803	8.42916	8.37635	8.23514	8.26751	8.41138	8.69369	7.01217	7.85922	8.24939	8.33776	8.08161	7.70635	8.61518	8.57177	8.31708	8.4148	7.54472	7.89036	8.13709	7.85255	8.08161	8.23142	8.09182	8.0894	8.05339	8.69914	8.32497	8.71189
AMZ1	5.15195	5.47386	5.05293	4.89871	5.253	5.12268	5.04897	4.85206	5.03295	4.97827	5.17461	5.2852	5.16428	5.11697	5.14415	5.17327	5.19351	5.134	5.12723	5.46309	5.09909	5.35115	5.36933	5.18726	5.17309	5.07076	5.24616	4.58371	4.70142	5.73287	5.65376	5.47184	5.04271	5.51368	5.13521	5.38038	5.06413	4.62575	5.48061	4.91973	5.10226	4.9884	5.16049	4.79801	5.02535	5.08643	5.01287	5.56098	5.65075
AMZ2	9.65864	8.45682	9.74734	9.93419	9.68993	9.57301	9.59069	8.6584	9.68708	9.33441	9.70686	9.67234	9.66379	9.72106	9.67551	9.70686	9.65298	9.73574	9.82916	9.6264	9.79296	9.40505	9.45689	9.72709	9.544	9.79892	10.1981	8.44633	9.33677	9.98277	9.91627	9.80187	8.91491	9.56554	9.70386	9.99699	9.60855	8.77754	9.33677	9.32144	9.81361	9.53322	9.79011	8.90322	9.55604	9.22464	9.63967	9.42872	9.58074
AMZ2P1	6.69074	5.33651	6.86036	7.09625	6.93506	6.7767	6.47082	6.84458	6.62426	6.83256	6.69459	6.7199	6.88441	6.83631	6.65488	6.53107	6.56604	6.6236	6.88531	6.38333	6.69307	6.56085	6.6493	7.09015	6.83631	5.61997	7.11878	5.81763	6.25919	6.351	6.64001	6.51516	6.05995	6.36216	7.28377	7.01383	6.72133	6.20505	5.99114	6.84582	7.13664	6.8736	7.1675	6.34776	7.04059	6.71598	7.02443	6.63526	5.85717
ANAPC10	6.44666	4.88311	6.23435	5.58053	5.94388	5.23797	5.8666	5.37858	5.93108	5.89283	5.59294	5.54115	5.81332	5.89018	5.60161	5.72578	5.68551	5.90897	6.04746	5.07014	5.81685	5.31974	5.42445	5.9215	5.9745	4.11209	4.96042	5.43252	6.08092	5.40977	5.0551	5.45153	5.23842	4.59544	5.51411	5.7961	5.62634	5.92296	5.59246	5.85118	6.08399	5.88583	6.10141	6.00466	6.87156	6.05298	6.5492	5.81948	4.75269
ANAPC11	6.78007	7.03708	6.86982	6.38333	6.59913	6.69142	6.65194	6.72434	6.86479	6.94457	6.64226	6.68707	6.68814	6.71193	6.6419	6.6419	6.69142	6.64744	6.78462	6.80299	6.68707	6.84915	7.02636	6.70928	6.61985	6.94155	7.24221	6.0303	6.1939	6.83211	7.02164	6.98088	6.25134	6.99407	6.78336	6.77583	6.39708	6.43376	6.87611	6.98131	6.72591	6.67908	6.98046	6.97741	6.84502	6.9315	6.60441	6.73748	6.25316
ANAPC13	7.03433	6.80826	6.7767	6.46661	6.6404	6.5437	6.78247	6.70695	6.79479	6.68666	6.63412	6.75492	6.72715	6.63128	6.60849	6.78247	6.65653	6.63675	6.59006	6.7415	6.62861	6.85664	6.92551	6.72992	6.67243	6.51516	6.48388	6.86389	7.0091	6.96484	7.18027	7.05735	7.12418	6.7222	7.00734	6.77752	6.65653	6.42437	6.68505	6.39049	6.48204	6.37451	6.48128	6.30371	6.56227	6.76182	6.77752	6.88531	7.03139
ANAPC15	7.43107	7.99227	7.42567	6.95265	7.05229	7.21301	7.28901	6.26845	7.44645	7.28487	7.40806	7.58326	7.56625	7.4519	7.4639	7.48564	7.44119	7.38481	7.55062	7.70802	7.30684	7.69455	8.15869	7.52275	7.48564	8.56161	7.6192	7.02164	7.22312	8.05079	8.14842	7.66805	6.99243	7.57655	7.1892	7.40099	6.54817	6.51623	7.2905	7.12554	7.16291	7.10193	7.62721	7.43592	7.44172	7.38655	6.89461	7.31403	7.32374
ANAPC16	9.92821	10.2784	9.61329	9.29191	9.76651	9.44072	9.97647	10.2299	9.9005	9.74734	9.76389	9.55329	9.73574	9.80506	9.73574	9.73866	9.72975	9.67551	9.8353	9.59867	9.84701	9.58074	9.74978	9.86815	9.81086	9.29191	9.81991	9.49433	9.70686	8.95641	8.69498	9.98277	10.3231	9.47228	9.59867	9.53584	9.76098	9.81086	9.83236	9.88115	9.92821	9.85038	9.85913	9.95387	9.67234	10.1735	10.2655	10.0782	9.88358
ANAPC2	5.77109	5.58855	5.95812	6.57197	5.4997	6.29727	6.10404	6.12832	6.00674	6.01895	6.21532	6.13323	6.14668	5.92608	5.90401	5.87972	6.02166	5.876	5.83214	5.97859	6.05012	6.17658	6.30477	5.94525	6.06146	7.3687	6.73268	5.37838	5.94153	6.28334	6.12226	5.87575	5.61645	7.18972	6.02134	5.60067	5.77275	5.82456	6.01232	5.86971	5.89795	5.64493	5.2795	6.11563	6.11009	5.63291	5.73998	5.95382	6.28901
ANAPC4	8.30929	7.72762	8.08683	7.58012	8.14332	7.07084	8.08772	8.01121	7.84571	7.95713	7.73673	7.64859	7.74621	7.84267	7.90883	7.8818	7.78642	7.71958	7.78572	7.57836	7.70288	7.80324	7.82566	8.02429	7.78696	8.41582	8.17871	8.09101	8.15587	7.61662	7.37661	7.97613	8.04496	8.11289	8.10577	7.47716	7.80883	7.96486	7.33276	7.55001	8.1155	8.105	7.80258	7.56946	8.12675	7.75254	8.12675	7.30414	7.21861
ANAPC5	6.3392	7.078	6.66078	6.60064	6.50382	6.5166	6.71037	6.62131	6.53225	6.66744	6.62251	6.66709	6.64628	6.70773	6.67631	6.6701	6.59738	6.6493	6.58971	6.70964	6.73223	6.76345	6.65883	6.62861	6.67822	6.18196	6.82454	6.65377	6.56794	6.44845	6.71634	6.33784	7.15492	7.05033	7.18542	6.72178	6.85039	6.68707	6.60993	6.55883	6.90893	6.50983	6.62426	6.38531	6.9141	6.3077	6.83171	6.07407	6.46197
ANAPC7	6.74385	6.09481	6.82222	6.1983	6.15131	5.98471	6.53264	6.64151	6.43159	6.24342	6.41646	6.20379	6.24191	6.35824	6.36143	6.30082	6.34714	6.3011	6.33393	6.37451	6.29957	6.2619	6.05504	6.31704	6.28399	6.07045	6.46815	6.8562	6.85915	5.75388	6.27459	5.96421	6.53185	5.99636	6.41264	5.96219	5.81272	6.27583	5.56852	6.54774	6.67403	6.29573	6.18806	6.41375	6.81385	6.24375	6.62756	6.1537	5.81602
ANG	5.23065	5.75286	5.20156	5.92775	5.51388	6.8673	5.45632	5.21939	5.43415	5.7125	6.17417	5.98085	5.70306	5.82534	5.95045	5.75097	6.16237	5.91146	5.95045	5.75905	6.11152	6.13525	6.46696	5.77886	5.74763	6.32137	6.16506	5.21782	6.50113	4.40211	4.79515	5.21874	5.87403	5.38081	5.97195	5.24097	5.90951	6.2708	5.56228	5.8869	5.56581	6.63898	5.69022	5.70833	5.34258	6.32392	6.0852	5.44911	4.94403
ANGEL1	6.16451	5.54462	5.28945	5.6075	6.02317	5.82377	5.84203	6.08871	5.76377	5.67149	5.67681	5.71197	5.66483	5.77434	5.73928	5.81457	5.74161	5.75021	5.70449	5.86916	5.6002	5.80071	5.65704	5.66828	5.62044	5.92936	6.15193	4.92299	5.78549	5.61002	5.71484	5.60419	5.61575	5.50504	6.0116	5.53277	6.05567	5.35295	5.8392	5.71718	6.21432	5.5612	5.76951	5.46769	5.99082	5.20366	5.77541	5.75799	6.28599
ANGEL2	5.7159	4.84185	5.44652	5.14915	5.97034	4.76594	5.31335	5.60259	5.32905	5.50573	5.30543	5.08787	5.19333	5.31379	5.38896	5.28856	5.3079	5.30385	5.35696	5.24228	5.38474	5.15215	5.10935	5.40267	5.39572	4.32244	4.77256	5.76926	5.99256	4.64581	4.28218	4.98978	5.54276	4.68802	5.39275	5.50623	5.57738	5.51319	5.30035	5.12328	5.21442	5.3387	5.53639	5.7151	6.08092	5.61924	5.57458	4.95213	4.88623
ANGPT1	4.34622	4.09627	3.78116	4.44602	4.65371	5.87055	4.64464	4.2704	4.45523	4.63151	4.67322	4.00101	4.34243	5.06367	4.59326	4.48294	4.59648	4.64602	4.51153	3.7522	5.0372	4.40249	4.4248	4.79019	4.85248	3.6503	4.06734	4.28664	4.90307	3.27149	3.46053	3.60745	5.52973	4.65616	5.323	4.99104	5.56077	4.59149	4.01021	5.54557	5.29206	4.37509	3.75518	5.11084	4.77843	4.45954	4.93352	4.49362	3.97423
ANGPT2	4.3568	4.20428	5.65829	4.57231	5.60317	4.351	4.66667	4.51437	4.3354	4.96773	4.76554	4.56223	4.98656	4.95936	5.1777	4.84706	5.05167	5.30035	4.91023	4.30558	4.97127	4.73271	4.46823	4.67138	5.02902	4.03064	4.01633	5.09951	4.32954	6.19034	4.5022	3.79755	4.42128	4.79412	4.56362	4.93179	5.36195	6.14339	5.4626	4.70068	4.39654	5.52195	4.90596	4.6413	5.05081	4.57631	5.13476	3.66679	3.95537
ANGPT4	3.99493	4.80077	5.16113	4.67322	4.68044	4.69436	4.67551	4.8376	4.63616	4.48669	4.75933	4.77568	4.71248	4.79039	4.79149	4.81471	4.89247	4.6802	4.72957	4.85248	4.58474	4.03931	4.01523	4.60031	4.74224	5.63133	4.45724	4.2758	4.1538	5.13167	5.19438	3.89497	4.29283	5.64666	4.50435	4.60855	4.67084	4.31275	4.49231	5.21673	4.67696	4.19984	5.02597	4.62172	4.72017	4.47974	4.65969	5.00463	4.89091
ANGPTL1	4.66065	4.65758	5.44698	6.46629	5.91281	5.56754	5.40422	5.08745	5.96359	5.81248	5.57715	4.99483	5.81547	5.67681	5.38081	5.69341	5.24866	5.49022	5.89018	4.48214	5.84104	5.02965	5.03463	5.58605	5.7101	5.02815	5.59267	5.44367	5.53301	4.18801	4.35198	5.31181	5.09718	4.29884	5.03968	6.16573	5.82431	7.26216	6.0303	5.43641	5.00401	5.09718	4.42758	5.91596	5.95076	6.05481	5.63185	5.6505	4.45991
ANGPTL2	7.41373	6.21034	7.03983	6.95039	7.79178	7.22712	6.79595	6.79386	6.61327	7.52589	7.47951	7.75117	7.07997	7.12463	7.52984	7.56121	7.48073	7.34405	7.42868	7.55255	7.24124	7.61283	7.42004	7.04755	7.24812	6.97788	6.89508	6.75968	6.77058	7.66563	7.4458	6.62681	6.72434	7.11929	7.49398	6.93384	6.954	7.47481	7.27043	6.33615	6.50046	7.18707	7.48505	6.76886	7.23075	7.09808	6.79479	7.04984	7.68717
ANGPTL3	2.76229	3.10233	2.99017	2.61427	2.66346	2.8317	2.65827	2.856	2.70002	2.72402	2.85334	2.83075	2.83432	2.73713	2.76478	2.76714	2.82136	2.83841	2.86347	2.87529	2.87156	2.8691	2.7678	2.8691	2.78788	3.33168	2.60629	2.92033	2.89486	2.83771	3.18187	2.85176	2.70994	2.89114	2.66645	2.92571	2.66683	2.65744	2.88474	2.89054	2.89636	2.71388	2.92005	2.92571	2.54709	2.81115	2.81889	3.09998	2.75034
ANGPTL4	5.00278	5.11151	5.05704	5.64722	5.13888	6.65965	5.40952	5.13787	5.28386	4.88211	5.46916	5.26431	5.53449	5.3063	5.64018	5.24056	5.65887	5.289	5.46652	5.54137	5.54971	5.64774	5.76773	5.2741	5.22711	6.21306	5.88535	5.09909	5.29206	4.90675	5.50719	5.3331	6.16265	5.30519	5.78321	5.89745	6.1823	5.32321	5.99666	5.13167	4.51475	5.46123	5.23217	4.92299	4.68663	5.97665	5.0221	4.55794	4.97791
ANGPTL6	4.52255	4.77568	4.62535	4.99564	4.90347	4.52371	4.53046	4.28737	4.73251	4.88725	4.93064	4.73685	4.82255	4.85431	4.80659	4.88311	4.78385	4.78877	4.65912	4.87915	4.66393	4.85145	4.965	4.72354	4.76614	4.35624	4.59975	4.24238	4.17649	5.04586	4.86815	4.15877	4.24045	5.15215	4.83343	5.09909	4.74529	4.76655	4.76112	4.7157	4.46429	5.101	4.89739	4.03044	4.62803	4.99792	4.99984	5.39762	5.54579
ANGPTL7	4.81979	3.78077	4.53492	5.21673	5.20497	4.86103	5.01027	4.30347	4.86195	4.87478	4.51531	4.57107	4.69966	4.74775	4.54607	4.42895	4.37138	4.74573	4.71085	4.63993	4.26678	5.14307	4.56647	4.76094	4.51038	4.96413	5.52409	4.93352	5.8566	4.59128	3.97477	4.73371	4.58391	4.47524	5.34659	4.89171	5.20843	4.78704	4.50493	4.39735	5.07736	3.80793	3.8567	4.63636	5.08282	4.91649	5.38774	4.07537	4.76033
ANHX	5.16536	5.93774	5.83806	5.15718	5.63032	5.34545	5.52598	5.87343	5.57382	5.23501	5.44007	5.54251	5.48957	5.36662	5.48862	5.56607	5.46585	5.41336	5.4415	5.7065	5.48578	5.22624	5.33562	5.50648	5.45962	5.90973	5.31021	5.19806	4.87076	6.00072	6.04919	5.62931	5.18353	6.07545	4.94132	5.54923	4.97046	5.26293	6.11361	5.36662	5.21088	5.39201	5.73973	5.23217	5.3583	6.05448	5.24549	5.65098	5.8392
ANK1	6.29635	8.01205	7.46652	7.00154	6.99729	7.09066	6.95619	7.51667	6.78047	7.07415	6.90205	6.93586	7.03185	7.27855	7.22911	7.04289	6.93627	7.29726	6.88441	7.53159	6.9033	7.00154	6.87022	7.00864	7.08637	7.04598	6.70495	6.25382	6.39507	7.75183	8.45578	6.60336	5.8035	6.95925	6.58389	7.98995	7.30846	6.37245	7.93803	7.412	7.44349	7.05229	8.00616	6.64073	6.70532	6.85289	6.88307	7.31249	6.84337
ANK2	5.55905	5.95933	5.39884	6.10977	5.85329	5.91652	5.91823	5.66879	5.94071	5.84315	5.62307	5.68946	5.7627	5.83456	5.76088	5.86688	5.75638	5.78321	5.78266	5.77541	5.78191	5.92668	5.84546	6.115	5.64774	5.29226	5.83344	5.00487	5.16368	5.14826	5.4818	5.6907	6.73192	5.80024	5.89116	6.14726	6.15618	5.71906	5.53119	5.93025	5.87218	5.77133	6.43946	5.7961	6.04975	5.82197	6.26845	6.01643	6.04131
ANK3	7.74354	8.60879	7.4838	7.42293	7.90571	7.1112	8.02671	8.14332	7.90163	7.69927	7.27257	7.46282	7.47716	7.74354	7.6064	7.80175	7.58882	7.51667	7.62228	7.39985	7.59695	7.50922	7.15588	7.67325	7.74696	6.78749	7.71685	6.94289	7.26064	6.87447	7.32265	8.02587	8.58777	8.74874	7.86263	7.6192	8.07754	7.59761	7.34301	7.95126	7.698	7.66947	7.81253	7.81474	7.69189	7.78828	8.32098	7.48815	7.44645
ANKAR	2.96283	3.24241	2.99145	2.7353	2.88442	2.91975	2.92151	2.99833	2.94974	3.27125	2.81215	2.83226	2.84931	2.93407	2.98189	2.91241	2.93041	2.88156	2.92033	2.98292	2.82334	3.16434	3.14255	2.87796	2.80831	3.09586	2.82039	2.72477	3.37715	3.23856	2.9379	3.40671	2.97815	2.98591	2.97568	2.86629	2.77523	3.04038	3.01412	2.86629	2.94613	2.84022	2.90972	3.24355	2.78974	2.80309	3.09511	3.04901	3.02615
ANKDD1A	5.03843	4.42167	4.43825	4.52312	4.53066	5.53539	4.69754	3.94158	4.6698	5.0502	4.90347	4.441	4.8376	4.91649	4.8597	4.80836	4.83382	4.63232	4.75249	4.41146	4.8994	4.86586	4.93265	4.77535	4.95321	5.49363	5.34459	4.53624	5.14058	4.60576	4.77168	3.62356	4.59107	4.43923	4.60637	5.19576	5.11453	5.13476	4.39348	4.78087	4.78524	4.36535	4.36328	5.07983	4.86647	4.73928	4.4997	4.56991	4.41784
ANKEF1	4.19497	3.8264	3.50526	4.18413	3.62436	4.30866	3.87727	3.5628	3.88601	3.87513	4.05699	3.92458	3.80866	3.83681	4.07107	4.00101	4.06013	3.95146	3.85346	4.02295	4.01486	4.22595	3.90457	3.78597	3.82566	3.94474	3.75262	4.21358	4.21066	4.06894	3.79082	3.53608	3.49938	3.98436	3.79137	4.07379	3.63864	3.96899	4.21324	3.70075	3.62908	3.84637	3.95006	4.40498	3.47786	3.64364	3.84165	4.74752	4.7469
ANKFN1	4.00065	4.36833	4.56397	3.77375	4.3143	4.35064	4.19157	4.13041	4.12437	4.11963	4.08103	4.31827	4.17747	4.12881	4.17446	4.19423	4.19462	4.19569	4.18162	4.25123	4.21466	4.25272	4.16532	4.20867	4.1171	4.78662	4.12036	3.95973	3.83893	3.63864	4.26451	4.31181	4.48214	4.41745	4.3153	3.82086	4.40541	4.20961	4.05151	3.99344	4.66496	3.91748	4.26093	4.25198	4.23785	3.6142	3.97406	4.59504	4.63115
ANKFY1	4.57349	5.17548	5.45175	5.31451	5.05361	5.58128	5.06523	4.85083	5.1534	5.29362	5.2291	5.30738	5.19459	5.29495	5.27724	5.32574	5.34012	5.32043	5.25779	5.28089	5.32277	5.3437	5.18904	5.19417	5.21131	5.07171	5.47408	5.02266	5.3541	4.95255	5.54368	4.45973	4.94008	5.36528	5.7144	5.28159	5.76481	5.25888	5.30237	5.33222	5.01091	5.00235	4.61519	5.02923	5.03169	5.24183	5.08559	5.2146	5.87189
ANKH	5.70678	5.34414	5.48628	5.78266	6.09481	5.87708	5.7081	5.62931	5.71415	5.76377	5.72992	5.74557	5.72207	5.79375	5.65245	5.83948	5.74133	5.8869	5.64921	5.67785	5.70011	5.80272	5.6907	5.69097	5.74692	5.64468	6.04944	6.06178	6.05382	5.5205	5.88359	5.94004	5.54877	5.4204	5.80935	5.64041	5.88084	5.19553	5.32434	5.89795	5.91335	5.17028	5.84461	5.48726	5.59839	5.59862	5.70084	6.07464	5.63389
ANKHD1	3.46993	4.32744	3.31094	3.96313	3.76014	3.77256	3.86609	3.45508	3.61295	4.08162	3.72574	3.48786	3.63992	3.81434	3.61048	3.52019	3.57599	3.63004	3.77057	3.60411	3.59433	4.00467	4.18215	3.64258	3.44691	4.39051	4.32054	3.86309	4.118	3.37539	3.2162	2.84931	4.17311	4.12665	4.08736	3.83299	4.11209	3.87727	3.69226	4.2318	4.22189	3.71309	3.38649	3.91411	3.98088	3.95874	3.75203	3.36804	3.37271
ANKIB1	6.118	5.24528	6.05836	5.89066	6.24846	5.7011	5.93137	6.11936	6.01232	5.82197	5.73072	5.67048	5.67917	5.87218	5.95875	5.87403	5.83755	5.82112	5.71828	5.3583	5.79289	5.92426	5.77516	6.06985	5.87027	4.26469	5.24361	6.44955	5.84493	5.07798	5.66133	5.88631	6.08845	5.64423	6.00326	5.97167	5.82706	6.25347	5.93395	5.98644	5.8182	6.25163	5.98195	5.84104	6.16265	5.95382	5.81144	5.95784	5.51736
ANKLE1	3.08733	3.23906	3.05419	2.95978	3.65621	3.58516	3.08916	3.82149	3.13054	3.05241	3.07139	3.08764	2.92292	3.2893	3.22761	3.26039	3.28236	3.28646	3.27667	3.22784	3.45491	3.31335	3.24683	3.40629	3.24355	2.78451	3.08443	3.06605	2.74367	2.96001	3.11548	3.10763	2.66167	3.30205	3.16058	3.2538	3.04625	3.31162	3.22613	3.38235	3.35845	3.85252	3.19023	3.92252	4.02277	3.94073	3.47895	3.76535	3.59003
ANKLE2	4.80316	4.12683	4.81187	5.44076	4.78483	5.42445	4.98227	4.81378	4.9167	5.00836	4.94545	4.86543	4.95936	4.99354	5.015	4.932	4.96641	4.90132	4.90634	4.95005	4.83362	5.01695	5.10493	4.97421	4.90429	5.06822	5.15903	4.54988	4.53687	5.0893	4.87559	5.00175	5.17264	4.84958	5.05489	4.84765	5.10735	5.20007	4.39654	5.10637	4.96984	5.15107	5.08471	4.99942	5.05933	4.50025	5.1713	4.37138	4.25871
ANKMY1	3.94396	4.5324	3.63787	4.2252	3.84128	4.13537	3.99787	3.67792	3.98568	4.17571	3.99272	3.97216	3.97769	4.04338	4.08846	4.0894	4.07463	4.04038	3.91016	4.059	3.94722	4.07342	4.19497	3.94199	3.97973	3.95483	4.3481	3.69519	4.03549	4.10466	4.38979	3.44739	3.6621	4.094	4.14793	3.88894	4.2418	3.86388	4.17801	4.11748	4.14925	3.94627	3.83979	4.50046	4.56553	3.589	3.85269	3.96275	3.90905
ANKMY2	10.1146	9.02771	9.28163	8.72561	9.63967	8.96766	9.57544	8.19294	9.41614	9.32144	9.21305	9.20503	9.18159	9.46945	9.20303	9.29382	9.31071	9.19335	9.23062	9.26903	9.38222	9.51524	9.46945	9.45446	9.44072	9.38953	9.65864	8.35758	9.65298	8.7763	9.11613	8.63548	8.53279	9.40505	9.65864	8.80803	9.70957	8.59529	8.6271	9.27728	9.97647	9.61898	9.40283	9.45446	10.1941	9.10338	10.1488	8.95641	9.36908
ANKRA2	7.34024	6.71945	6.93292	6.76135	7.23461	7.66685	7.56187	7.99621	7.43696	7.07032	7.22712	6.58051	7.20141	7.2109	6.8974	6.94947	6.8978	6.97741	7.24168	6.74857	7.16691	6.24279	6.38029	7.29562	7.05685	5.06544	7.13182	6.6419	7.49648	6.3521	6.48905	6.76012	6.73748	6.49722	7.38778	7.18126	7.05278	7.3561	7.49168	7.03283	7.66235	7.71437	7.43237	7.21051	7.80547	7.21393	7.80547	7.68966	6.67951
ANKRD1	11.4093	8.70536	10.4505	10.3231	11.5874	11.9263	10.8747	11.43	10.0819	10.401	11.195	11.1538	10.2948	10.5196	11.43	10.4399	10.1854	10.2784	10.6685	10.3514	11.2041	8.6777	8.86873	10.0887	10.4562	9.05193	10.0921	9.24453	8.12151	11.1624	12.2458	9.90341	9.83236	11.0183	10.6609	10.3651	10.0669	10.7645	11.4189	10.1941	12.5159	12.3351	13.2155	10.7498	13.34	9.46436	10.0921	10.248	10.0551
ANKRD10	5.59786	5.45315	4.994	5.27235	5.78241	4.86703	5.32995	5.10493	5.10185	5.55905	5.36465	5.19417	5.22275	5.53373	5.37606	5.26225	5.29182	5.22603	5.37534	5.16202	5.3548	5.43149	5.48816	5.23157	5.2795	4.4096	4.90738	5.45428	5.34545	5.25582	4.87214	5.5077	5.61457	5.19373	5.62984	5.10249	5.66556	5.91627	5.64091	5.39623	5.70181	5.64468	5.86525	5.37327	5.5576	5.22229	5.37812	5.07171	4.44715
ANKRD10-IT1	6.48699	8.23238	6.66744	7.10371	7.05074	6.95489	7.35898	7.53039	7.20955	7.27758	7.18126	7.52092	7.16033	7.40099	7.36533	7.32819	7.07711	7.03659	7.23132	7.20955	7.12327	7.24926	7.0723	7.44236	7.28274	7.38424	7.44349	7.52214	6.84747	7.59122	7.59248	7.09486	7.97105	8.3596	7.57836	7.10816	7.48743	8.02833	7.81701	7.70561	7.15315	6.61027	6.51084	7.23132	6.45498	6.80054	7.19882	7.09066	8.14751
ANKRD11	7.26892	7.38885	6.89096	6.74385	7.45377	6.96613	7.04598	7.45315	6.9898	6.94772	6.95443	7.12025	7.03811	6.96228	7.11322	7.13467	7.1112	7.00864	7.0025	7.23239	7.06739	6.9884	7.06288	6.8673	7.09808	7.39571	6.97419	7.37899	7.33642	7.35502	7.36241	7.72373	7.79338	7.64198	7.21496	7.04425	6.96693	6.51809	6.85754	6.7545	6.68108	7.03044	7.16433	7.18482	7.01169	6.95882	7.09714	6.88175	6.91455
ANKRD12	6.17877	4.89717	5.31725	5.66828	6.36418	5.07454	5.43344	5.3747	5.31887	4.97791	5.62906	5.12914	5.46074	5.80885	5.49214	5.497	5.23326	5.5969	5.66011	4.68587	5.98935	5.30543	5.32229	5.34978	5.38648	4.72975	4.77412	5.66011	5.67842	4.6037	5.03506	5.8792	6.84701	6.01322	5.59645	5.50092	5.63846	5.62462	4.90615	5.78037	5.14586	6.58314	6.05326	5.27682	6.16573	4.92438	5.87085	5.06096	4.46236
ANKRD13A	5.61951	6.05749	5.73258	5.38752	5.27528	5.47786	5.57661	5.61081	5.42424	5.74369	5.59387	5.51319	5.54877	5.47927	5.57913	5.48225	5.41038	5.4656	5.51952	5.4204	5.49317	5.87002	5.97477	5.61028	5.57358	6.01926	5.58877	5.5564	5.97777	5.48532	5.19959	5.05579	5.25961	5.22409	5.83372	5.11151	5.62113	5.86063	5.42269	5.44317	5.49418	5.6098	5.41806	5.76297	5.69177	5.96587	5.54854	5.81457	5.73949
ANKRD13B	5.04338	5.87972	5.12133	4.79885	5.02369	5.03656	5.12662	4.92757	5.04854	5.05975	5.10637	5.43595	5.22315	4.932	5.0442	5.14014	5.0406	5.06476	4.98329	5.53882	5.06583	5.62827	5.51876	5.07498	5.13996	6.07605	4.96881	5.04143	5.1468	5.53472	5.11718	4.93676	4.81979	5.38659	4.49549	5.1429	5.31662	5.01409	4.5828	4.91443	5.09975	5.16732	4.75874	5.17111	4.9884	5.48602	5.01779	5.30589	5.66508
ANKRD13C	4.99145	3.57325	4.18968	4.87953	4.7248	4.41954	4.61317	4.53729	4.54866	4.73452	4.54811	4.13641	4.61819	4.57009	4.51569	4.40602	4.47075	4.55752	4.58797	3.76614	4.58816	4.32457	4.16737	4.50453	4.49607	3.37539	3.69133	5.24295	4.9491	3.4796	3.6092	4.62095	5.0976	3.39883	4.24361	4.61081	4.44771	4.88458	4.39886	4.78859	4.71548	4.65537	4.54627	4.974	5.02675	4.64029	4.86049	4.14231	3.70837
ANKRD13D	4.80961	5.99606	5.1744	5.0111	5.11718	5.0822	5.12895	5.06646	5.05	4.78683	5.1696	5.13356	5.0788	5.08974	5.17614	5.1127	5.16323	5.16493	5.18794	5.46195	5.26391	5.33017	5.30674	5.30497	5.14503	5.83289	5.60113	4.82826	5.23305	5.74133	5.37694	5.41423	4.94403	5.65778	5.11392	4.89964	4.94649	5.14524	5.18568	5.15655	5.12563	5.01647	4.96289	4.89412	4.6802	5.34125	5.12957	5.44816	5.33107
ANKRD16	4.49473	3.93448	4.73035	4.6706	5.27863	5.02345	4.66591	4.18987	4.71146	4.78524	4.76934	4.76889	4.53548	4.70516	4.69853	4.66065	4.82556	4.72498	4.62955	4.74838	4.74092	5.03025	4.9671	4.77625	4.73516	5.10871	4.67585	4.82618	4.99483	5.25847	5.06413	4.56008	4.68162	4.5835	4.75953	4.68447	5.03592	4.45917	4.28218	4.49119	4.28737	4.54886	4.33451	4.60715	5.03681	4.9169	4.79127	4.09264	4.68608
ANKRD17	8.50897	7.72571	8.11386	8.31608	8.71512	8.44012	8.39513	9.24453	8.3398	8.27348	8.05803	8.41363	8.07498	8.34846	8.52936	8.4882	8.42424	8.40476	8.14842	8.3741	8.34846	8.19722	7.76436	8.16299	8.33069	8.08424	8.61373	8.84109	7.67265	8.34069	8.58533	8.35859	9.3148	9.2149	8.57063	8.74004	8.68986	8.54004	8.04242	8.17791	7.98	8.19209	7.92824	7.82346	8.34069	8.25124	8.10058	8.15869	8.38727
ANKRD18A	3.75597	3.41866	3.33061	3.32505	4.60231	3.59177	3.99344	3.60702	3.77354	3.62962	3.5167	3.42636	3.58605	3.60856	3.50857	3.51692	3.55736	3.4072	3.47036	3.39592	3.52614	3.90672	3.80281	3.56882	3.60518	3.00608	4.03123	3.27481	3.9306	3.59477	4.31569	3.2776	4.06258	4.27293	3.78338	3.69797	3.88715	3.23158	3.791	3.17213	4.13477	3.9455	3.89589	3.5875	4.01466	4.07794	3.92573	2.82561	3.8113
ANKRD18B	4.03621	4.08162	4.54443	3.65621	4.29283	3.36666	3.7647	3.78217	3.60496	3.82731	3.90957	3.96524	3.9746	4.04493	4.02974	4.13659	3.97609	3.99878	4.05808	4.15061	3.83933	3.46424	3.60187	3.724	4.146	3.91552	4.45935	3.43975	4.32345	3.34177	4.13189	3.4787	4.14942	4.74505	4.03267	3.98896	4.21762	3.71684	4.57188	4.29225	3.86309	2.92033	3.9911	4.60637	3.22658	3.94703	3.57496	4.06129	4.5239
ANKRD19P	4.82454	5.87135	4.85951	4.75714	5.21152	4.93558	5.28813	5.2627	5.21759	5.37581	4.83633	4.99734	4.99221	4.69539	4.67122	4.74242	4.81772	4.77007	4.74838	5.02389	4.76013	4.88664	5.12895	5.23369	4.70297	5.31247	5.02715	4.71465	4.73885	5.29158	4.43862	5.37606	5.39973	4.97599	4.3137	4.77729	4.60695	4.48294	5.01736	4.83906	5.08995	4.91649	5.15069	5.15696	5.71954	5.08168	5.23868	5.18551	5.39192
ANKRD2	4.92636	4.69194	7.32316	5.61899	6.24248	6.98762	5.62608	5.10429	5.59087	5.4058	5.5853	5.58102	5.86631	5.52622	5.75638	5.71879	5.84593	6.59122	5.61333	6.24248	5.90542	5.59246	5.92095	5.76405	5.6155	5.59341	5.5595	5.3831	5.45915	6.36068	8.3596	6.11123	6.61224	5.88535	5.20391	5.74028	5.91903	5.55321	6.52883	4.79577	5.7323	5.64266	6.67822	5.2701	5.48653	4.65557	5.20583	5.1408	5.50236
ANKRD20A11P	6.00326	6.98499	6.54556	5.49579	6.3044	6.70137	6.26815	6.87833	6.36111	6.2097	6.20351	6.20043	6.25441	6.35274	6.31704	6.39887	6.33717	6.19892	6.2813	6.42607	6.32459	5.67048	5.84176	6.12288	6.32316	6.13389	5.85611	5.68868	5.36952	5.74841	5.8498	6.81639	7.15981	6.47853	6.17588	6.16722	6.06482	5.67072	5.78736	6.44877	5.95212	6.60064	7.09861	7.1212	5.82327	6.81556	6.83672	6.78007	7.23294
ANKRD20A12P	3.86096	4.07777	4.71248	4.02312	3.94056	3.94512	4.07976	4.07161	4.1003	3.80903	3.96235	4.16436	3.98158	4.09111	4.03085	4.04038	4.04433	4.06718	4.1129	4.24159	4.12915	3.87803	3.93744	3.85406	4.06702	5.08602	4.01656	3.67344	3.28712	3.92441	3.9119	3.86799	4.26658	3.94685	3.97572	4.22236	3.86191	3.93329	4.18465	3.74914	4.52732	3.59569	4.41459	3.80516	3.62418	4.14675	4.41208	4.3481	4.53924
ANKRD22	3.94986	4.17629	4.30031	4.12324	4.19752	4.62973	4.16198	4.14249	4.15155	4.13229	3.95598	4.25141	4.09459	4.31622	4.27928	4.20043	4.21976	4.2344	4.10371	4.41185	4.37661	4.20574	4.53279	4.22337	4.4421	4.54524	4.14752	4.65574	4.24987	3.87383	3.91393	4.21555	5.12026	4.17727	3.73107	4.12416	4.39364	3.79933	4.02133	4.48669	4.47639	4.74505	4.50861	4.02914	4.20774	4.54648	4.06753	3.60018	3.22031
ANKRD23	4.24305	5.38015	4.15711	5.21804	4.75511	5.62582	5.08643	5.14802	5.12703	4.17629	4.70961	4.78349	4.77452	4.59386	4.64011	4.63636	4.50617	4.63616	4.68406	4.60517	4.78066	4.99041	4.71064	4.99734	4.8327	5.96755	5.70859	4.36664	5.30079	4.63355	5.43461	4.49013	4.60265	6.06724	4.38304	5.12625	6.20143	4.2548	4.31771	5.06413	4.8956	4.99852	4.56322	5.11556	4.648	5.1528	5.17006	5.65912	4.8939
ANKRD24	4.3389	4.74881	4.71726	4.15212	4.48798	4.44119	4.50164	4.45706	4.48368	4.37821	4.40541	4.49892	4.42345	4.44058	4.49646	4.51187	4.51475	4.44327	4.40734	4.61043	4.433	4.51496	4.56342	4.3284	4.36396	4.96003	4.47469	4.37156	4.55171	4.50066	4.1668	4.63875	3.7999	4.54544	4.27487	3.97256	4.04659	4.42642	4.50413	4.52527	4.38751	4.43449	4.46006	4.63951	4.13382	4.71424	4.34036	4.83675	5.26689
ANKRD26	4.87076	4.76194	4.63951	4.01103	5.07858	4.8358	4.77609	4.84604	4.73988	4.23064	4.69313	4.33362	4.7229	4.8323	4.64318	4.74925	4.37842	4.5721	4.85	4.30712	4.87838	4.39579	4.22251	4.72765	4.67302	3.22409	4.094	4.02516	4.3877	3.62379	4.58594	5.20325	4.95936	4.70943	4.61959	4.55079	5.18568	4.47524	3.99509	5.02228	5.14848	4.80597	5.29041	4.26678	5.39996	4.90429	5.43986	4.51118	4.23715
ANKRD26P3	3.70291	4.13856	3.10604	3.70114	3.80573	3.31113	3.48508	3.51737	3.5274	3.4478	3.55716	3.6305	3.55364	3.62272	3.57939	3.53719	3.56571	3.65309	3.78461	3.67757	3.51626	3.43327	3.54017	3.59395	3.47014	3.67642	4.41307	3.94932	3.04682	4.12641	4.14831	3.61631	3.19576	3.97512	3.65779	3.52319	3.32669	3.86331	3.63172	3.06651	3.48462	4.00722	3.48419	3.34058	3.56989	3.48073	3.32847	3.42047	3.51384
ANKRD27	8.12597	7.72161	7.44236	7.03433	7.35502	7.11783	7.67399	7.01896	7.73268	7.51729	7.35395	7.27369	7.24065	7.36689	7.45315	7.55557	7.5087	7.39743	7.44172	7.57008	7.44926	7.63167	7.36582	7.46706	7.55317	7.75883	7.61155	8.25124	8.34168	7.50342	6.94594	7.83236	7.34629	7.3052	7.22361	7.20179	6.61408	7.78642	6.88486	7.29415	7.00554	7.49585	7.20141	7.4069	7.17365	7.68185	7.47047	7.52275	7.72974
ANKRD28	5.16428	5.01434	5.09273	4.89412	5.73594	4.42513	5.20539	5.35988	4.88232	4.96168	4.98188	4.96481	4.98294	5.01541	4.96393	5.00401	4.8994	4.89133	4.89518	4.63414	5.06605	4.86895	4.88043	5.10318	5.07547	4.27651	4.60776	5.26573	4.62935	4.62017	4.28513	5.05912	5.88274	5.63897	5.19626	5.08602	5.23482	5.43415	4.37156	5.00252	5.289	5.55393	5.422	4.744	4.73804	4.61378	5.10845	4.3155	4.97686
ANKRD29	6.76135	5.10125	6.33259	6.5503	5.55201	5.50119	5.92608	5.8408	5.96832	6.17445	6.21746	5.66582	6.16024	6.33361	6.1983	5.84715	5.9859	6.06783	6.13261	5.26112	6.07436	5.74397	5.82509	6.11835	6.31033	5.64869	5.34728	6.94947	5.67576	5.89819	4.98696	5.70626	4.53378	5.36445	6.42504	6.38465	5.95613	6.59529	5.11111	6.73223	6.10861	6.53698	5.78434	6.74857	6.81556	6.11902	5.45609	6.22188	5.3079
ANKRD30A	3.46362	3.47676	2.9028	3.12547	2.93212	3.02987	3.0243	2.93463	2.96572	3.37271	3.05443	2.9881	3.00633	3.07648	3.21376	3.18563	3.13587	3.01548	2.9531	3.14329	3.13783	3.39211	3.2004	3.37094	3.09998	3.34875	2.88848	3.19601	2.71612	3.31041	2.61109	3.06155	3.09659	3.47763	2.95716	2.88267	2.99065	3.51626	3.33784	2.86497	3.26713	3.13104	3.53066	2.95771	3.02145	3.03484	3.38715	3.42813	3.74673
ANKRD30B	2.58094	2.83105	2.59718	2.5496	2.89167	2.68472	2.56439	2.46431	2.64383	2.58682	2.64383	2.55384	2.56037	2.63343	2.60629	2.62185	2.65216	2.70209	2.69106	2.79479	2.59873	2.66683	2.77123	2.67846	2.67227	2.70626	2.71267	2.60819	2.88641	2.43475	2.80714	2.55707	2.91024	2.80512	2.20565	2.35109	2.38577	2.76438	2.81461	2.4584	2.68018	3.00341	2.693	3.1649	3.0655	2.89141	2.67728	2.95802	2.73783
ANKRD30BP2	2.82978	2.55071	2.70626	2.91614	2.57679	3.10233	2.58889	2.77916	2.74542	2.69547	2.7678	2.75765	2.7678	2.88735	2.71776	2.65216	2.67227	2.6902	2.76917	2.64383	2.59043	2.92845	3.1679	2.60297	2.61328	2.83711	2.58148	2.62558	2.94337	2.7476	2.76053	2.82364	2.84788	3.04793	2.41798	2.61427	2.5668	2.81796	2.72367	2.93728	2.97463	3.37804	2.92822	3.13183	2.80928	2.88968	2.88096	2.54068	2.31563
ANKRD30BP3	3.12016	3.64071	2.98024	3.18819	3.48115	3.00947	3.17835	3.13684	3.25448	3.17311	3.22331	3.25448	3.23209	3.18098	3.22177	3.25091	3.13607	3.17311	3.16256	3.28578	3.04493	3.19321	3.24427	3.04713	3.1872	3.55574	3.4487	3.20906	3.05569	3.62624	3.22409	3.64874	3.35243	3.5198	3.412	3.55241	3.30487	3.06387	3.24585	2.8508	3.04223	3.15501	2.99464	3.35967	3.00501	3.20574	3.02485	2.89141	3.4122
ANKRD31	3.45025	3.55023	2.89486	2.84469	3.39833	3.30581	3.09437	3.00687	3.20648	2.96516	3.21026	3.27733	3.22331	3.11571	3.0946	3.07113	3.14905	3.22568	3.23635	3.19023	3.12521	3.36429	3.47627	3.11621	3.16408	4.30866	3.28646	3.73933	3.08319	3.21103	3.48159	3.39187	3.17799	3.62764	3.48889	3.47809	3.2573	3.09511	3.18592	2.79077	3.19852	3.26472	3.16108	3.23725	3.29415	3.18337	2.94974	2.92063	2.90714
ANKRD32	4.36793	3.42704	4.19947	4.28664	4.79952	3.72261	4.18744	3.87365	4.12476	4.32163	4.06631	3.6094	4.08976	4.34111	4.15252	4.02243	3.98088	4.32474	4.21857	3.45304	4.13625	4.29283	4.26843	4.13246	4.23785	2.75836	3.92926	4.22952	4.43469	3.43595	3.58328	4.31959	4.46174	3.77131	4.04606	3.57367	4.00832	4.34903	4.07234	4.62821	4.77625	4.35904	4.59935	4.33066	4.92636	4.146	4.89539	4.12532	3.58562
ANKRD33	3.55319	3.97138	3.38782	3.51409	3.32963	2.78752	3.2914	3.27344	3.25332	3.18641	3.48547	3.5215	3.54677	3.46552	3.46257	3.43883	3.4042	3.50018	3.34324	3.412	3.26176	3.10233	3.00398	3.34783	3.55574	4.28331	3.31662	2.87921	3.44375	3.60119	3.20159	3.26738	2.94443	3.37578	3.25899	3.06651	3.47743	3.38213	3.57561	3.3696	2.83105	3.47275	3.36312	3.88026	3.32482	3.67956	3.0452	3.96488	3.83531
ANKRD33B	5.87654	4.99441	5.12089	4.97066	6.09451	4.86414	5.45385	5.47642	5.17596	5.06916	5.10871	5.18794	4.98572	5.22399	5.07498	5.33497	5.32205	5.52364	5.2076	5.43059	5.41245	5.3345	5.1478	4.84958	5.26001	3.92534	5.14228	5.52527	4.69178	5.47452	5.33497	5.47642	5.4422	6.50916	5.66828	5.3354	5.84663	5.03572	4.79059	5.64618	5.44076	4.63212	4.79577	4.92281	4.96273	5.32553	5.34194	5.30818	5.59064
ANKRD34A	5.60697	5.02835	4.85807	4.88645	5.97505	4.88946	5.13805	5.40721	5.23326	4.7964	5.15086	5.25321	5.05955	5.03865	5.17006	5.1534	5.06737	5.11211	5.10975	5.60955	5.13747	5.21739	5.0372	5.39933	4.98436	4.87638	5.50215	5.28089	4.84086	5.11922	5.85898	5.24469	5.60568	5.43173	4.91382	5.03592	5.54784	4.30412	5.01091	4.66393	4.45645	4.82943	5.10318	4.75308	5.22029	5.33266	5.73433	5.42015	5.80201
ANKRD34C	3.05729	2.82906	3.98382	3.08916	3.34443	2.91818	3.25542	3.29304	3.03121	3.12547	3.01185	3.15204	3.06387	3.04951	3.03353	3.0018	3.01817	3.28505	3.23236	3.23236	3.05219	3.04038	3.07347	3.1092	3.34271	3.37667	2.68136	3.44584	2.99783	3.16571	2.88156	2.88766	3.47232	3.17141	2.98779	2.91707	3.18359	4.08812	2.64289	2.96516	2.82716	3.56756	2.96603	3.65965	3.09352	3.40489	2.71112	3.4857	3.30536
ANKRD35	5.80247	6.29635	5.49022	6.63446	6.21124	6.58314	6.05868	5.83372	6.07319	6.17164	6.34363	6.46197	6.18842	6.26455	6.28599	6.27202	6.41375	6.1913	6.15339	6.34994	6.31311	6.58672	6.99644	6.27943	6.15558	6.69898	6.92864	6.04246	6.52276	5.56777	6.20763	6.03872	5.9355	5.56024	6.45283	5.96359	6.65338	6.14035	5.69671	6.16756	6.02317	6.37997	6.14668	6.3514	5.74789	6.41948	6.16451	6.1431	6.31674
ANKRD36	4.44386	2.76745	3.88679	3.70016	4.27111	3.73835	3.78497	3.52278	3.90534	3.9566	3.76411	3.57916	3.79043	4.06569	3.90865	3.79462	3.8098	4.03155	3.90457	3.01817	3.92989	3.48529	3.42565	3.90672	3.88623	2.34679	3.09437	4.27092	3.98418	3.71525	3.08369	3.73891	4.93179	4.1299	3.4796	4.18576	4.46117	3.94357	3.49854	4.17208	3.60055	4.05826	3.74494	4.13115	4.43072	4.05936	4.38672	4.15895	3.91992
ANKRD36B	6.0708	7.09162	5.26431	5.74966	7.22164	4.85887	6.08092	6.54091	5.81069	5.51587	5.63995	5.567	5.78549	6.26947	6.12661	6.50947	6.05662	5.77223	5.58474	5.50428	5.71828	5.31911	5.54604	5.59135	6.06872	4.95399	5.32109	6.71709	5.74133	6.04297	6.35557	6.33818	8.75851	8.54116	7.10616	6.23651	6.579	6.16603	5.73514	5.29628	5.41671	6.21532	6.31842	5.42759	6.18629	5.87403	5.7736	4.82864	5.96977
ANKRD36BP2	3.21596	3.29664	3.11041	3.15526	3.21422	2.77057	3.11511	2.96897	2.91614	3.22986	3.67681	3.1143	3.04197	3.3858	3.0327	2.99411	2.97679	3.12216	3.06442	2.98542	3.44622	2.97815	3.11816	3.16962	3.19647	3.05419	3.06702	3.1646	3.02804	2.91949	3.09242	2.92986	3.05675	3.11476	3.02093	3.02485	3.04013	3.19192	2.99972	3.47294	3.02405	4.57188	2.80343	3.20813	2.98075	3.09921	3.23705	4.05492	3.09363
ANKRD36C	3.13684	3.17036	3.0243	2.83364	2.85777	3.42657	3.16841	2.86291	3.16546	3.31967	3.14255	2.99947	3.08495	3.00398	3.07917	3.05467	2.91559	3.07068	2.99043	2.97867	2.97838	2.97089	3.10943	2.99251	3.0879	3.34394	2.74003	2.84469	3.11988	3.20481	2.69727	3.1724	3.45447	3.43928	3.06497	3.01271	3.26713	3.668	3.18891	2.62877	3.05219	2.99809	3.22885	3.1719	3.20301	2.77154	3.22809	3.03905	3.12362
ANKRD37	5.2841	5.5205	5.71828	4.87339	4.76913	5.30589	5.2678	4.93435	5.09869	5.52551	5.3063	5.17572	5.47743	5.27998	5.18794	5.25911	5.09398	5.18068	5.28454	5.14761	5.16071	5.25823	5.34459	5.05827	5.2146	4.62556	5.00658	4.20005	5.3831	5.88967	5.19041	5.37992	5.56024	4.68101	5.44501	4.75933	6.00524	5.4271	5.73029	5.38506	5.45632	5.49139	5.61997	5.10226	5.75047	4.86586	5.4267	4.86349	4.84686
ANKRD39	5.73433	5.26293	5.92884	6.52412	5.49604	6.24908	5.77382	6.11178	5.75526	5.94244	6.08365	5.9308	6.00127	5.97421	5.74161	5.84822	5.8362	5.73258	5.91464	5.85062	5.72834	6.17197	6.3352	6.22188	5.88477	6.42126	5.77807	4.86777	5.7047	5.9235	5.70964	6.04975	5.6797	5.93977	6.30139	5.62855	5.81408	5.56325	5.53492	6.01764	5.9106	5.83509	6.03398	5.96022	6.20259	5.92833	6.20175	5.72909	5.46966
ANKRD40	5.03656	5.50551	5.15984	5.87319	5.22118	5.88052	5.42947	5.50454	5.41878	5.64065	5.56474	5.42467	5.47408	5.37671	5.46847	5.3563	5.50504	5.37163	5.43934	5.35503	5.5097	5.45407	5.59645	5.46895	5.49139	5.42494	5.06781	5.74966	6.01384	5.37236	5.02923	5.36356	5.11618	4.54289	5.42153	5.52551	5.36933	5.40063	5.34978	5.57715	5.63441	5.40627	5.41108	5.48296	5.37258	5.57687	5.25961	5.55974	5.31863
ANKRD44	4.77901	4.6718	4.40659	4.40943	4.54866	3.93726	4.30347	4.24684	4.31589	4.49549	4.52255	4.39943	4.41268	4.55382	4.50046	4.37084	4.48294	4.45706	4.56647	4.34694	4.56282	4.40659	4.35307	4.44658	4.42007	3.67265	4.10235	4.61859	4.69413	4.01351	3.46489	3.77077	4.63897	3.86995	4.26896	4.16942	4.82682	4.90132	4.2906	4.86396	4.78997	5.04979	4.74944	5.06869	4.62458	4.63775	4.47817	4.82883	3.53368
ANKRD44-IT1	3.01817	2.89255	2.7702	3.19391	2.6902	3.53351	2.99326	3.53225	2.99972	2.86845	3.0802	2.87737	2.92005	3.08764	3.02855	3.00744	3.0259	3.02223	3.00054	2.9881	2.93354	3.10943	2.86879	3.04308	2.97923	3.23209	3.27125	3.01923	3.09214	2.81796	3.03432	3.43575	2.88556	2.7107	2.77916	2.90423	2.20565	3.35943	3.25707	3.60811	2.90687	3.30193	3.32917	3.44249	2.94741	3.10791	2.97545	3.19463	3.18915
ANKRD45	3.12822	3.3912	3.37667	3.09537	3.09841	3.29117	3.24832	2.99172	3.37248	3.26062	3.11845	3.11165	3.1303	3.18148	3.16306	3.05539	3.19806	3.32409	3.18098	3.12167	2.96117	3.497	3.76614	3.20086	3.1143	2.99464	3.43245	3.61986	3.84752	3.1872	3.26353	3.15935	3.28666	3.11988	3.66697	3.12442	3.23906	3.11476	3.62667	3.02855	3.53123	3.26378	3.31757	2.79514	3.52895	3.13747	3.53286	2.81115	3.30354
ANKRD46	7.91769	6.76634	8.58185	7.33699	7.83075	7.68046	7.90004	7.77151	7.98925	7.66747	7.62108	7.46874	7.5394	7.76739	7.78198	7.77927	7.78572	7.78066	7.79034	7.4838	7.89036	7.46706	7.38078	7.705	7.88404	6.3718	7.57957	7.76579	8.08683	7.20141	6.37925	7.5989	7.68966	6.94115	7.35957	7.17067	7.41255	7.86711	7.74167	7.89036	7.9588	7.86056	7.69255	8.05581	8.02924	8.32876	8.28034	7.78897	7.49341
ANKRD49	7.57655	7.28844	7.07363	6.47916	7.44236	6.68143	7.22712	7.69989	7.16181	7.24381	7.3687	6.78893	7.12224	7.22361	6.99683	7.0601	6.9133	7.20806	7.2471	6.26634	7.32316	6.96484	7.06429	7.31015	7.28061	7.33964	7.03708	6.97957	7.13417	7.00517	6.55138	6.74939	6.19483	6.80592	7.12276	6.49112	6.73464	7.6953	7.06559	7.38655	7.92727	7.21703	6.85371	6.91798	7.32374	7.41255	7.71752	6.88397	6.27427
ANKRD50	5.73827	4.37122	5.66977	5.30406	6.30169	5.19373	5.46823	5.57805	5.57982	5.63107	5.28856	5.58204	5.35763	5.4587	5.61107	5.60291	5.65493	5.63265	5.54392	5.15507	5.38441	5.3313	5.04082	5.5067	5.46123	5.39364	5.20736	6.30672	6.15307	5.45609	5.93897	4.76291	5.50141	5.0788	5.82377	4.96228	5.04037	5.41945	5.61304	5.08745	5.58029	4.93718	5.54251	5.99752	6.15954	5.34012	5.41622	5.00046	5.66309
ANKRD52	6.45033	6.78462	6.78857	6.4685	6.66978	7.03529	6.73032	6.6059	6.78289	6.48277	6.75693	6.78541	6.73507	6.49722	6.67444	6.66003	6.63243	6.71752	6.54593	6.98131	6.65265	7.03139	6.89865	6.57232	6.57572	7.44407	6.75652	6.74857	6.15072	6.91929	7.34629	7.03283	6.74628	7.34249	6.43662	6.69074	6.62061	6.15006	6.69694	6.36449	6.25723	6.46696	6.67523	6.20108	6.49979	6.81639	6.47748	6.74464	7.31131
ANKRD53	4.26451	4.81935	4.10466	4.20103	4.2518	4.24537	4.29615	4.50647	4.2256	4.36254	4.16737	4.31329	4.18688	4.18182	4.29689	4.25399	4.3081	4.12621	4.2258	4.32991	4.2598	4.5917	4.69436	4.32264	4.33198	4.77922	4.41075	4.1299	4.45583	4.53532	4.55244	4.08695	4.6517	4.26696	3.98493	4.35358	4.43634	4.31181	4.21742	3.9875	4.19006	4.32054	3.86309	4.29028	4.16789	4.30958	4.11563	4.48445	4.85722
ANKRD54	4.53569	4.3799	4.63737	5.50428	5.169	5.1211	4.93022	4.93416	5.00678	4.80397	4.95901	4.92477	4.94403	4.75837	4.86146	4.78087	4.84424	4.97276	4.85267	4.89659	4.93085	5.01203	5.13632	4.90553	4.91116	6.03752	5.14355	4.51354	4.8025	5.20925	5.00734	4.77256	4.84806	5.01919	5.08075	4.58222	5.06916	5.07099	4.36362	4.76291	4.7984	4.79473	4.79311	5.20987	4.78208	4.68201	4.83064	4.75837	5.00218
ANKRD55	2.94225	3.57961	3.54506	3.59158	3.23507	3.55319	3.7776	3.36335	3.39788	3.40217	3.51803	3.18407	3.34017	3.47036	3.31067	3.36687	3.34017	3.33418	3.31516	3.3648	3.31846	3.34128	3.32338	3.44181	3.47209	4.18008	3.70409	3.27596	3.27294	3.2769	3.18148	3.46257	3.95127	3.55384	3.41642	3.46362	3.43883	3.17883	3.74594	3.37667	3.30602	3.40921	3.82029	3.38495	3.45304	3.2004	3.49122	2.83841	4.21235
ANKRD6	6.45992	6.16961	6.48486	6.51188	6.17912	5.88303	6.40774	6.76182	6.4068	6.62173	5.90076	6.0827	6.35437	6.21246	6.49651	6.16931	6.21843	6.16327	6.40433	5.89631	6.12044	6.09685	6.14668	6.3217	6.3269	5.48816	6.46558	7.27585	6.49112	5.75072	6.04386	5.7494	5.74841	5.9049	7.21301	6.36111	6.25039	6.46523	6.21843	6.22485	6.34837	5.89868	6.20013	6.69739	7.07612	6.19101	6.11989	6.03576	6.01134
ANKRD60	4.17259	4.25441	4.62839	3.95335	3.64295	3.92049	3.76556	3.80342	4.14982	3.99929	3.99892	4.09362	4.09012	4.04038	4.03343	4.06646	4.16198	4.17874	4.12096	4.15958	4.20315	4.04338	3.94891	4.04116	3.9877	4.22485	4.20158	4.32182	4.30535	4.28684	4.83362	4.02366	4.05716	4.41613	3.87984	4.14637	3.96294	3.63069	4.39146	3.6959	3.19759	3.86115	4.01735	4.23715	3.52064	4.03678	4.23123	4.32762	4.47018
ANKRD65	5.24491	5.68715	5.30818	4.92497	5.24036	5.5275	5.33288	5.47899	5.45081	5.47548	5.51975	5.52504	5.41899	5.47105	5.42558	5.47452	5.60067	5.34281	5.2148	5.3828	5.32529	5.14524	5.19763	5.12644	5.42993	5.59087	5.25321	4.52527	5.15884	5.41018	5.10513	4.78446	4.83906	5.16389	5.45009	5.33562	5.47548	5.18154	5.3437	5.48934	4.91238	5.31043	5.27904	6.74738	6.15255	5.65271	4.85124	5.20194	5.47762
ANKRD7	3.12246	2.75483	2.4426	3.33886	2.82237	2.85297	3.05894	3.02381	2.90505	2.90044	2.71535	2.54765	2.99695	2.84901	2.79077	2.85982	2.70363	2.86192	2.76546	2.693	2.74728	2.78418	2.69466	2.6477	2.99972	2.618	2.80277	3.10518	3.04468	2.99197	2.81657	3.04793	3.24241	2.59089	3.22906	3.02537	3.03769	2.46431	2.92237	3.46686	2.72661	3.07996	2.93969	2.86253	2.64949	2.69803	3.62764	2.78072	2.47411
ANKRD9	7.32436	7.75678	7.41147	6.59846	7.17269	7.17222	7.31072	7.47774	7.23413	6.9553	7.09761	7.18179	7.23962	7.02954	7.11454	7.17269	7.08339	7.21963	7.09536	7.36241	7.09214	7.17519	7.33161	7.22269	7.1168	7.97273	7.46988	6.67707	7.05468	7.57517	7.53817	7.53039	7.41726	7.64653	6.87112	6.98762	6.89695	6.58425	7.09911	6.8026	6.97327	7.10148	7.67572	6.72762	6.76182	6.94726	7.02856	7.48868	7.81026
ANKS1A	7.8655	8.15587	8.26173	8.25124	7.55874	7.97831	8.11119	8.16471	8.09274	8.18921	8.04981	7.8802	8.08598	7.92727	8.05581	7.92315	7.97349	7.90338	7.96032	8.19454	8.07498	7.99385	8.00705	8.21044	7.98766	8.32295	7.95639	8.16214	8.08856	7.99971	7.58815	8.86483	8.57941	8.0971	7.82132	8.19903	8.24754	8.14751	7.39504	8.09274	8.04422	7.91537	7.4659	7.80474	7.8802	8.00308	8.00373	7.47176	7.33373
ANKS1B	3.68228	3.20393	3.67956	3.52385	3.4131	3.17982	3.43618	3.28214	3.38144	3.7395	3.42391	3.35751	3.43027	3.48972	3.49747	3.41289	3.38046	3.39811	3.37515	3.30782	3.41244	3.82905	3.6849	3.39788	3.56201	3.75928	3.07113	4.45565	3.88753	3.34722	3.35452	3.22358	3.49294	3.32757	3.5354	3.33691	3.13004	3.50062	3.13839	3.48675	3.60313	3.43883	3.6443	3.78077	3.71271	3.89396	3.2794	3.31493	3.11261
ANKS3	5.565	5.44408	6.3687	5.79051	5.76563	5.60879	5.83241	5.31887	5.74815	5.68767	5.72703	5.81628	5.74638	5.69097	5.78266	5.72937	5.90342	5.7255	5.79214	5.9355	5.755	5.76794	6.14911	5.81763	5.91253	7.2617	5.77569	5.86357	6.00102	5.71081	6.27943	5.80201	5.32664	5.63567	5.6962	5.47208	5.54711	5.98644	5.90951	5.45009	5.99959	5.74966	5.75203	5.41806	5.25321	5.76926	5.66309	5.72782	6.27265
ANKS4B	4.21627	4.31071	4.31806	3.91587	3.79043	3.93172	4.06222	4.19533	4.08281	3.79859	3.98606	4.00613	4.02097	4.15438	4.21722	4.18309	4.15958	4.17013	3.99753	4.20885	3.7191	4.02169	4.13839	4.10611	3.865	4.73428	4.24381	3.69351	4.10504	4.61138	4.36494	4.419	3.71292	5.24932	4.28791	4.03515	3.65858	3.98475	3.9703	3.71889	3.95483	3.72492	3.83716	3.98341	4.43964	4.18444	3.96025	4.16864	4.33772
ANKS6	4.40641	4.42045	4.20645	4.18688	4.50925	4.30274	4.39616	4.32182	4.20663	4.49398	4.28383	4.31806	4.27596	4.34395	4.36014	4.37247	4.32474	4.28513	4.2299	4.28399	4.22148	4.54024	4.62402	4.25741	4.19827	5.0946	4.39866	4.50104	4.43923	4.60051	4.55676	4.36291	4.21646	4.71042	4.34355	4.25688	4.14196	4.32684	4.2476	4.24421	4.17241	4.1041	4.3499	4.4098	4.30012	4.24893	4.10758	4.31771	4.35307
ANKUB1	3.04925	3.2259	3.39527	3.76371	3.53583	3.29021	3.32482	3.15596	3.40328	3.40809	3.26353	3.25921	3.27247	3.37539	3.35219	3.40991	3.34783	3.27431	3.31094	3.35338	3.34887	3.57852	3.45264	3.39305	3.22153	3.65156	3.03694	3.24875	3.36643	3.79951	3.35312	3.15451	3.05966	3.01102	3.33144	3.38889	3.319	3.41713	3.37271	3.53328	3.57832	3.0327	3.49417	3.50108	3.41798	3.38281	3.10604	3.57769	3.61942
ANKZF1	6.65765	7.53524	6.88745	7.10559	6.95039	7.31353	7.09214	7.49869	7.10193	7.0038	7.1962	7.09671	7.04504	7.06739	7.01124	7.02636	7.07635	7.09625	7.13855	7.30088	6.98453	7.16804	7.25379	7.17933	7.0273	7.72373	7.24275	6.73347	7.44407	7.40265	6.74226	7.26469	7.01805	7.96568	7.12948	6.67202	7.1112	7.05788	7.08824	7.47047	7.1527	7.00335	6.7767	6.68927	6.42575	6.94861	7.18868	7.29268	7.42293
ANLN	2.94199	2.76438	3.35041	3.58048	4.71369	3.24218	3.33928	4.11327	3.43286	4.69833	3.54036	3.43327	4.26914	3.21492	3.34898	3.18433	3.2336	3.04654	3.25282	3.24427	3.29855	3.01844	2.89605	2.97545	3.35706	2.62695	3.00203	4.52027	3.54856	4.11027	3.66697	3.11792	3.22658	3.02562	3.64171	3.37006	2.95116	3.76636	4.01787	3.05219	3.69413	3.41601	3.46993	3.20859	5.9215	3.213	3.15647	3.25921	2.95771
ANO1	5.79401	4.77391	5.06993	5.98736	5.0188	5.26445	5.15569	4.55876	5.33383	5.62582	5.31662	5.57805	5.47899	5.52025	5.54164	5.40357	5.39159	5.53901	5.38597	5.59135	5.33202	5.53301	5.1408	5.32883	5.42108	3.79522	4.39348	5.7688	4.75026	5.54137	5.31639	4.4272	4.53606	3.98658	5.05293	5.19087	5.24932	5.98406	5.63739	5.80201	5.28242	5.33383	5.69985	6.20728	6.38531	5.282	5.2111	5.84769	5.2858
ANO10	5.72003	6.25471	5.50648	6.36111	6.18776	6.97147	6.32909	5.74083	6.17588	6.37798	6.31069	6.41572	6.20823	6.1247	6.40509	6.28366	6.44161	6.32137	6.19764	6.54055	6.215	6.41822	6.64819	6.22807	6.21662	6.64226	6.43194	6.75773	6.39049	6.52207	7.00427	6.04944	6.36558	6.53844	5.81975	6.43909	6.11304	5.96803	6.1973	5.72129	5.80935	6.40132	6.01294	6.219	5.86113	6.29892	5.78321	6.05044	6.28668
ANO2	4.01715	4.58182	4.3153	3.62293	4.04936	4.26789	4.01828	4.04375	4.01633	4.08242	4.20218	4.12801	4.09055	4.13134	4.2358	4.27708	4.18069	4.30365	4.16051	4.18931	4.2358	3.94474	3.75948	4.07142	4.07573	4.07303	4.1955	2.91873	3.75384	4.68121	3.92158	3.93271	3.58605	3.83569	3.95296	3.8856	4.7469	4.39716	4.93495	3.92887	4.35198	4.62261	4.56837	4.35198	4.27635	4.06992	4.69599	3.35943	4.05334
ANO3	2.84564	3.20459	3.44229	3.28806	3.02615	4.03064	2.96204	3.40606	2.9442	3.31094	3.45645	3.28578	3.38023	3.52214	3.43685	3.30354	3.23382	3.30945	3.41244	3.07113	3.56322	3.33103	3.58092	3.38628	3.24286	3.33397	3.05539	3.88136	3.9746	3.10128	3.05729	3.05467	3.68925	2.82655	3.1156	3.29831	3.69658	3.57281	3.93615	3.37289	3.32081	3.48441	3.0452	3.57144	2.91528	2.7743	2.93269	3.41913	2.84931
ANO4	3.2336	3.48316	3.38165	3.64295	3.16817	3.42941	3.30121	3.48031	3.40831	3.63089	3.28236	3.40443	3.36312	3.35409	3.37358	3.36286	3.40081	3.31162	3.3648	3.36194	3.34653	3.32873	3.4366	3.32015	3.25899	2.77952	3.34177	3.29395	3.59088	3.33168	3.83912	2.97815	3.27294	3.34017	3.17115	3.1031	3.43347	3.51715	3.80053	3.19852	3.7882	3.65621	3.53871	3.6881	4.42045	3.57477	3.51954	3.33418	3.10684
ANO5	9.28993	9.45188	8.30929	8.43231	9.65047	8.12226	9.34356	7.96568	9.24862	9.07544	8.74157	8.71189	8.89645	9.06037	8.8673	9.0926	8.80122	8.85713	9.05685	7.99621	8.98206	8.47813	8.45046	9.18733	9.05855	8.20285	8.64482	8.15205	9.07748	7.45248	7.8081	8.77515	9.07544	9.26694	8.62964	7.82426	8.78159	8.50897	8.074	8.93078	10.1058	8.29439	8.55074	9.4095	9.8749	8.70185	10.01	9.10168	9.48479
ANO6	5.68525	5.70449	5.91253	5.91541	5.81119	6.51449	5.69825	6.34616	5.89927	5.83651	6.16785	6.00557	6.00182	6.17445	6.26258	6.06898	6.32566	6.06482	6.04331	5.95756	6.2088	5.81547	5.7801	5.58029	6.07171	4.2474	5.57282	6.04555	5.71718	5.04182	5.96977	5.77084	6.40578	5.48653	6.10861	6.59811	6.4525	6.04497	6.02404	6.36697	5.54322	6.18196	5.65447	5.99494	6.02458	6.20259	5.89018	6.29758	6.12073
ANO7	4.59367	5.60186	5.59111	4.62637	4.99063	4.94132	5.17707	5.23217	5.31247	4.99332	4.84745	5.19576	4.88579	4.96481	5.03902	5.05786	4.94364	4.96749	4.94773	5.28341	4.92858	4.63897	4.62222	5.03233	5.03189	5.50141	4.85124	4.837	4.50765	5.91541	6.08122	4.65052	5.27201	5.59387	5.34349	5.0626	5.25982	5.05912	5.20671	4.51077	4.88987	4.48255	5.45452	4.69927	4.63291	4.5038	4.41594	4.65052	4.74613
ANO8	5.64493	6.2385	5.09438	5.35898	5.16493	5.23482	5.49039	5.44174	5.45542	5.39159	5.49604	5.55712	5.50868	5.33473	5.34915	5.47548	5.43505	5.3387	5.40648	5.57935	5.38659	5.46585	5.40445	5.34459	5.43149	5.80247	5.66633	5.72937	5.20602	6.05356	5.39028	5.77465	5.70522	6.33992	5.25847	5.51812	5.11577	4.98483	5.13081	5.15984	5.1809	5.36551	5.58831	5.02715	4.80229	5.53046	5.22932	5.5444	5.55125
ANO9	4.7829	4.93003	5.31335	4.25888	5.20431	4.47342	4.64781	4.62347	4.76013	4.86915	4.94523	4.89739	4.82742	4.70881	4.71669	4.79759	4.77314	4.78623	4.7982	5.10618	4.89133	4.69477	4.49473	4.82883	4.79392	5.26445	4.74925	4.57651	4.28346	5.40357	4.97557	5.54164	4.19082	5.36952	4.58533	4.84262	4.50571	4.33733	4.61916	4.47056	4.52546	5.41533	4.36648	4.4309	4.45991	4.76452	4.63757	5.02715	5.52527
ANP32A	7.03811	6.15255	7.05835	7.88799	7.71823	7.75407	7.1097	6.92335	7.09861	7.13799	7.22014	7.38725	7.0601	7.46874	7.43938	7.51846	7.58681	7.46523	7.34738	7.48253	7.40204	7.34515	7.00864	7.53406	7.43478	5.8403	6.83796	6.97114	6.97741	6.22748	6.49759	7.19779	7.49762	6.64966	7.18868	7.18707	7.40749	7.76162	7.1097	7.65518	7.25788	6.83631	7.14526	7.35898	8.24486	6.97957	7.46282	7.4659	8.75558
ANP32A-IT1	3.31562	3.05294	2.79997	2.87767	3.40557	3.2778	2.84279	2.8041	3.21129	3.03176	3.17586	3.15576	2.9752	3.19215	3.19626	3.20459	3.13863	3.05916	3.09321	3.15204	3.28348	3.18771	3.1744	3.23535	3.14527	2.89841	3.46597	3.35102	3.85197	3.19852	2.77838	3.03382	3.42326	2.96309	3.02004	2.86595	3.23976	3.66447	3.09485	3.30074	3.17835	2.69803	3.26788	2.86629	2.47411	2.66839	3.12822	2.9671	4.05976
ANP32B	9.91299	10.0957	9.01205	9.85624	9.81086	9.4966	9.59612	8.48163	9.45446	9.72975	9.91627	9.95085	9.74978	9.89034	9.9599	9.91627	9.9095	9.98277	9.9095	9.83236	10.0819	10.0004	10.3748	9.85038	9.85913	10.1301	9.84396	10.3912	10.5249	9.66379	9.12504	9.88358	10.1301	9.81086	10.0782	9.73866	10.239	9.97951	9.37343	9.70957	9.52787	9.52528	8.94702	9.74978	9.1481	9.45689	9.21916	9.54849	9.93122
ANP32C	3.46424	2.91115	3.53103	2.88582	3.5145	3.55679	3.49595	3.46767	3.34017	2.69425	3.21052	3.43421	3.35083	3.29996	3.30825	3.30849	3.32313	3.19119	3.12822	3.21931	3.2819	3.03014	3.0259	3.2178	3.47809	3.92907	3.16698	3.3543	3.65474	3.15748	3.31237	3.24427	2.81018	3.18457	3.11621	3.28348	3.84128	3.24122	3.76213	3.47763	4.03987	2.97463	3.01817	2.96842	2.83928	3.08469	2.89085	3.84089	3.5167
ANP32D	2.99886	3.02485	2.78072	2.94613	2.94172	3.17141	2.92873	3.59821	3.04713	2.6877	2.86879	2.89568	2.8641	2.82716	2.81304	2.78752	2.78846	3.04118	2.96686	2.97089	2.96142	2.7749	2.66471	2.88582	2.83296	3.77873	3.10336	2.84022	3.14826	2.75524	2.79041	3.47676	3.26062	3.35987	2.91559	3.11139	2.96174	2.87737	3.29529	2.92571	2.66883	2.79441	3.01383	2.86595	2.92899	2.89697	2.55013	3.05866	2.99642
ANP32E	6.33644	5.22886	6.45067	7.76298	7.11411	6.68505	6.80389	6.52239	6.71864	6.87022	6.77626	6.61601	6.67484	6.954	6.72915	6.954	6.86205	6.90718	6.89508	6.27583	6.96057	6.18509	5.80327	6.95925	6.98184	3.54486	5.65912	7.12327	6.80344	5.68174	6.38237	6.63898	7.33907	5.99344	6.47782	6.73942	7.07415	7.05685	6.87571	6.7972	7.07269	6.77096	7.15009	6.78247	7.04838	6.55742	6.94031	7.07658	6.71669
ANPEP	3.38605	3.92751	3.4955	4.22357	3.8567	3.65073	3.79735	3.87474	3.67265	3.68031	3.73799	3.67851	3.75558	3.72199	3.76194	3.78597	3.68289	3.79273	3.69658	3.75095	3.71388	4.07285	3.9977	3.8098	3.69007	3.5875	3.76154	4.1223	3.97442	3.55187	2.97387	3.64258	4.02956	3.83336	3.31211	3.32622	4.14562	4.00722	3.99344	3.96672	3.8961	3.86428	4.00211	4.05377	3.38605	3.58878	3.30375	4.12604	4.20574
ANTXR1	5.35565	5.2269	5.15549	5.7801	5.60857	5.13825	5.43934	5.48387	5.44767	5.40883	5.34869	5.6515	5.45759	5.34437	5.45104	5.45153	5.45847	5.36662	5.40602	5.5614	5.36933	5.41178	5.32947	5.33383	5.46488	5.57142	5.52269	5.90542	5.36059	5.74608	5.2148	5.22953	4.72975	5.34125	6.0636	5.3168	5.43059	5.66309	5.51812	5.22185	5.11193	5.13787	5.15195	5.52868	5.66258	5.04082	4.92098	5.36263	5.55277
ANTXR2	5.76563	4.90489	4.95255	5.73619	5.77005	5.51139	5.56777	5.23521	5.55277	5.48841	5.54344	5.34215	5.39545	5.60186	5.61764	5.53146	5.59814	5.45385	5.56375	5.17242	5.72183	5.62483	5.73433	5.543	5.4769	5.54276	5.70702	5.40468	5.9106	5.08888	5.00003	5.49857	5.70964	5.80616	5.68767	5.47345	5.6155	5.71197	4.79717	5.315	5.15486	5.98054	5.15023	5.2965	4.90509	5.738	5.40063	5.5386	5.18111
ANXA1	7.01612	6.12163	6.71469	6.93896	6.88225	7.26112	7.12751	7.27954	7.01759	7.40584	7.37441	6.31102	7.1527	7.01304	7.33046	7.22269	7.28844	6.70456	7.33586	6.02623	7.24275	6.48854	6.43909	6.57168	6.98722	6.35856	5.97997	6.45461	8.16471	6.118	6.31102	6.56485	7.77281	6.65568	8.46685	6.69694	6.34804	6.59089	6.92918	6.49438	6.67503	7.94351	7.80102	6.47675	7.86644	6.46771	5.94472	6.50341	6.04159
ANXA10	3.07575	2.60536	2.76981	3.22005	3.10738	3.55187	3.00842	3.04443	2.91923	3.00973	3.00898	3.10233	2.93407	2.99668	2.93269	2.96686	3.01743	3.00608	3.03197	3.0775	3.23008	2.76981	3.19647	3.43071	3.3874	3.22081	3.48337	3.5339	3.28756	2.73091	2.9752	3.33928	3.6465	2.8981	3.66582	3.28324	3.43027	2.49192	2.85111	3.21758	3.18118	2.4826	2.90948	3.02269	3.31378	2.64604	2.85777	3.03458	2.86192
ANXA11	8.42916	8.88116	8.46902	8.62126	8.66321	8.35758	8.62126	8.92603	8.54004	8.52458	8.56507	8.64834	8.5134	8.53157	8.67194	8.75851	8.64834	8.68176	8.53517	8.80659	8.63214	8.71652	8.63317	8.56507	8.59387	8.91023	8.98548	8.77515	8.57177	8.73205	8.82944	8.82813	8.52332	9.22464	8.77515	8.55916	8.30541	8.31022	8.29734	8.24184	8.32295	8.47929	8.52231	8.44012	8.17612	8.59661	8.49147	8.40476	9.08384
ANXA13	3.61512	4.11027	3.87474	3.46386	3.96294	3.47786	4.04471	4.08658	3.81823	3.55043	3.37874	3.77975	3.6413	3.63214	3.61492	3.75616	3.54525	3.50461	3.60094	3.85424	3.65374	4.02817	3.69351	3.92405	3.60702	5.10032	3.61965	3.96995	4.08373	3.99176	3.96714	3.81043	3.82213	4.30693	3.9171	3.74914	4.05056	3.75015	3.43639	3.23033	3.75362	3.75404	3.58426	3.21229	3.50018	3.77956	3.63442	3.56526	3.43575
ANXA2	8.47011	8.72561	8.61241	9.22874	8.5304	9.39386	8.83687	9.86198	8.8198	9.05685	8.86601	8.92465	8.75016	8.89344	8.92603	8.89344	9.0467	8.92906	8.80803	8.98206	8.91333	9.24263	9.2796	8.85568	8.82534	9.50105	8.92149	9.61591	8.93252	9.32377	9.18371	8.45788	8.43345	8.98959	8.95968	8.8856	8.92763	9.18021	8.91333	8.99113	8.64834	8.81837	8.52803	8.89344	8.54954	8.75705	8.06369	8.93773	8.75016
ANXA2P1	3.98676	4.06835	4.3324	4.37398	4.11401	3.7193	4.16127	4.04135	3.84148	4.06242	3.97296	3.93487	4.03497	3.92104	3.93172	3.92712	4.09148	4.20608	4.14508	4.04511	4.30846	3.95202	4.03719	4.19175	4.0957	4.58391	4.33308	4.14732	4.61338	4.01541	5.1822	4.03567	3.56424	3.69639	4.15609	4.16961	3.82962	4.28737	4.09439	3.97973	4.34505	3.96822	4.04622	3.89826	4.30994	3.57367	3.56882	4.35885	4.00981
ANXA2P2	9.01205	9.19157	9.11236	10.2614	9.15611	10.1577	9.85624	10.9328	9.97344	9.93761	9.79296	9.77261	9.71239	9.73866	9.75255	9.72106	9.91627	9.76389	9.68135	9.63704	9.52261	8.89985	8.97878	9.32586	9.66677	10.6685	9.74978	10.8279	10.0069	10.3961	9.76651	8.8889	9.08384	9.55813	9.53058	9.57817	9.62184	10.3556	9.67551	9.87179	9.54849	9.70957	9.4475	9.56554	9.52528	9.80778	8.58777	9.44314	9.31915
ANXA2P3	4.46255	4.08621	4.21448	4.9652	4.67927	5.58877	4.64069	4.36132	4.72875	4.66293	4.6802	4.80376	4.82921	4.76392	4.77168	4.78025	4.97644	4.78502	4.74904	4.69296	4.66905	4.351	4.62172	4.974	4.7964	5.00175	4.65677	5.61133	4.2502	5.24978	4.86586	4.37416	4.28399	4.51569	4.46505	4.6979	4.74729	5.33406	4.04471	4.38322	5.61081	4.61673	4.88705	4.40541	4.70799	4.75249	4.11098	4.32571	3.74319
ANXA2R	5.63567	5.3168	5.77912	5.34615	5.13211	5.28813	5.25646	5.34025	5.33848	5.44987	5.60472	5.30519	5.36998	5.63948	5.47277	5.45584	5.46285	5.55076	5.53074	5.33802	5.58252	5.25961	5.65245	5.37446	5.5635	5.53449	5.46895	5.33759	5.09781	5.1538	4.96352	5.32157	4.47779	5.77084	5.49628	4.70383	4.85557	6.09272	5.12936	5.76822	6.1896	6.02511	5.83456	5.59544	5.76297	5.46966	5.15675	5.82902	5.20217
ANXA3	6.52622	7.14677	8.68986	7.14162	5.9116	6.5812	7.47481	7.6637	7.3561	7.26364	6.46558	6.71469	7.33907	6.72513	7.12597	6.75931	6.81032	6.95803	7.30903	6.51623	7.32709	6.93722	6.72915	7.15932	7.19369	7.60331	5.69022	8.75423	6.88441	8.27039	7.20646	7.9595	6.05961	7.66304	7.1028	7.75329	6.26289	7.63825	7.83604	6.00072	6.94245	6.49476	6.83463	6.90205	6.44257	8.22847	7.27954	6.81198	5.23482
ANXA4	8.16471	6.88923	7.49994	8.76121	8.06212	7.72089	7.75951	6.79559	7.75678	8.28925	7.92086	8.09536	7.91404	8.1381	8.03766	8.04981	8.15205	8.29536	8.17704	7.68253	8.19903	8.27348	7.89551	8.19722	8.08328	7.607	7.48505	9.38222	8.70185	7.57454	6.75897	7.94911	7.29457	6.60964	7.73611	7.62931	7.92393	8.73205	7.73536	8.15869	7.87665	8.1902	7.66747	8.16643	7.70802	8.25236	7.54533	8.5928	8.03913
ANXA5	10.7305	9.55077	9.79892	10.4917	9.82631	10.4234	10.0551	9.10168	10.0168	10.3607	10.3374	10.3331	10.2655	10.3556	10.5414	10.4604	10.6115	10.3607	10.3331	10.3556	10.4073	9.96345	9.63704	10.2349	10.2574	8.85713	9.65298	10.6883	10.4917	10.1378	10.4862	10.1488	11.1262	9.97647	10.7928	10.4399	10.6609	10.8686	10.3556	10.048	9.39852	9.88358	9.46436	10.2259	10.1146	10.4604	9.07912	10.0551	9.93419
ANXA6	5.66187	6.04015	6.21532	6.14974	5.85454	6.93384	5.91335	5.83403	5.85482	5.98138	6.13389	6.48352	5.9923	6.08199	6.22064	6.33584	6.3194	6.18447	5.99959	6.52515	6.07862	6.34158	6.45358	6.14062	6.18746	5.9485	6.49759	5.76458	5.2625	6.51623	6.62901	5.97395	5.94184	6.76182	6.37211	6.26125	6.36418	5.66703	5.88828	6.15924	5.90706	5.98085	5.64921	5.92997	6.59453	6.00012	5.78837	6.32099	6.6767
ANXA7	9.48936	9.0926	9.0947	9.55077	9.3758	8.9344	9.26903	10.1981	9.3758	9.21916	9.26694	9.14306	9.16962	9.46204	9.29583	9.25247	9.27728	9.37994	9.35383	9.11613	9.32377	9.12685	9.19335	9.13386	9.28587	8.00782	8.75154	9.31696	9.42119	8.36271	8.26652	9.28993	9.29191	8.44633	8.96766	9.18371	9.02931	9.629	9.44512	9.80778	9.43833	9.74419	9.45689	9.76651	9.29382	9.60394	9.48936	9.63447	9.09985
ANXA9	3.77215	3.68246	3.76904	4.24987	3.83875	3.8895	4.10087	3.87192	4.25741	4.28684	3.46807	4.16752	3.66288	3.56385	3.72179	3.80534	3.68427	3.77057	3.59202	4.00832	3.75712	4.42895	3.93846	3.65819	3.48031	4.96664	3.52895	5.4348	4.53279	4.69754	3.39833	3.92142	3.69087	4.42797	4.28829	3.87945	3.66002	4.01809	3.62293	3.68212	3.81168	3.68769	3.51867	3.90309	3.67208	4.13418	3.54054	3.668	3.47036
AOAH	5.08008	5.65624	5.39116	4.74573	5.38727	5.27106	4.85621	4.78349	4.90596	5.19959	5.5171	5.49723	5.32508	5.41756	5.21068	5.33848	5.2701	5.51042	5.54808	5.46371	5.1744	5.70886	5.85769	4.93863	5.12218	5.36307	5.69565	4.72153	5.61764	5.67094	4.97706	4.91198	4.66784	5.22711	5.54736	4.5549	4.85345	5.47655	5.15173	5.94362	5.57607	5.46327	4.96352	5.10249	4.81396	5.28768	4.8774	5.67497	5.4578
AOC1	3.61942	3.51006	3.52454	3.07673	3.09242	3.08495	3.08656	2.94766	3.2893	3.30945	3.51255	3.5628	3.51715	3.17765	3.06777	3.19049	3.26088	3.33886	3.40606	3.43618	3.17684	3.71827	3.79462	3.09191	3.40035	4.14773	2.88128	3.22409	3.66384	3.43928	2.79612	3.36406	3.01573	3.39458	3.0997	3.27851	3.36502	3.15911	2.89085	3.58328	3.05165	3.62726	3.52236	3.55824	3.21643	3.7495	3.12901	3.62479	3.3461
AOC2	3.54571	3.45735	3.46053	3.96429	3.31605	4.85164	3.55902	3.35102	3.35845	3.68334	4.25741	3.89736	3.76371	3.83167	3.94627	3.50265	3.98122	3.71031	3.9266	3.78257	3.72923	3.96916	4.12584	3.70291	3.87709	4.04022	3.66487	3.69939	3.46006	3.38325	3.24195	3.71483	4.76808	3.52655	3.91034	4.46311	3.79542	3.63845	3.63884	4.00832	3.73224	4.22337	3.16744	3.47187	3.71388	4.29208	3.46121	3.51431	3.85214
AOC3	7.87665	7.52918	8.30826	7.8994	8.13377	10.0036	8.38395	8.68035	8.24754	8.15205	9.0009	8.36998	7.96032	8.37522	8.88258	7.94187	9.06037	7.99621	8.45046	8.51553	8.6873	8.25124	8.3741	7.72089	8.7763	8.67335	8.16214	8.64834	8.14151	8.12852	8.05425	6.34966	8.63317	8.61373	8.61518	9.13771	8.35151	8.42092	8.24486	8.97731	7.28946	9.02771	7.39985	8.82671	7.57063	9.15979	7.71213	8.58892	8.32396
AOC4P	5.3788	5.87814	6.02907	4.59245	5.289	5.14397	5.53566	5.3826	5.44652	4.84024	5.32434	5.63739	5.46534	5.31043	5.34238	5.45248	5.46394	5.4183	5.43887	5.69462	5.23932	5.08374	5.12174	5.22886	5.35544	4.90779	4.81417	4.31941	4.95766	6.06568	5.19935	5.65803	5.57501	5.5605	4.99564	5.37648	5.48578	5.15718	6.09806	5.20671	5.06281	5.06394	5.48482	5.27638	4.84126	5.17288	5.05933	6.63203	6.42607
AOX1	4.62499	6.3817	4.433	5.79999	5.02248	5.67785	5.58702	5.21629	5.43173	5.59387	5.0907	5.59737	5.45892	4.95746	5.23259	5.20715	5.26875	5.26156	5.3017	5.00678	5.37163	6.0578	5.47596	5.35268	5.13458	5.8811	5.22315	7.26064	6.07802	5.50993	4.60576	5.69462	5.63412	5.57607	5.53146	5.6244	5.27863	5.93717	5.22953	4.71465	5.06118	5.30977	4.47919	4.70694	4.47269	5.53228	4.8272	4.63539	4.75026
AOX2P	3.51935	3.06254	3.86956	3.55555	3.73325	3.61171	3.53246	3.5596	3.29943	3.30261	3.72324	3.69658	3.59113	3.49294	3.51737	3.50573	3.53651	3.71232	3.65241	3.84283	3.49439	3.32779	3.22005	3.18168	3.67833	4.31605	3.43953	3.05996	3.63133	3.46489	3.94474	3.77003	3.56464	3.67504	3.44712	4.00299	3.48246	3.70988	3.37667	3.11523	3.66907	3.37289	3.51232	3.51028	3.28666	3.50396	3.43265	3.59246	3.62944
AP000230.1	4.59544	5.46871	5.20799	4.49798	4.96729	4.59751	4.8358	5.17461	4.89871	4.78208	4.86856	4.73906	4.95723	4.8272	4.62057	4.86543	4.86605	4.90209	4.85664	5.2543	4.8272	4.69277	4.87397	4.91023	4.80639	5.50023	5.88164	4.45019	4.80597	4.83906	5.20583	5.56629	5.08374	5.41156	4.61256	5.02987	4.36648	4.21158	4.55264	4.94191	4.42895	4.6694	5.20843	5.15424	4.74182	4.96984	5.00252	4.4635	4.39886
AP000253.1	3.2361	3.38782	2.89461	2.64604	2.8824	3.00315	3.09867	2.84901	3.12339	3.00744	2.95771	2.96737	2.95631	3.10156	2.99087	3.16332	3.03723	2.83226	2.85234	2.9405	2.93996	2.75765	2.99411	3.14277	3.0539	3.24098	3.16306	2.62085	2.83197	2.90251	3.38004	2.926	3.16434	2.88065	3.06128	2.87253	3.29324	3.07321	3.33716	2.56272	2.85297	2.96633	3.05866	2.68846	2.5668	3.49143	3.29464	3.13365	3.20881
AP000265.1	3.02459	3.34417	2.7486	3.18509	2.87796	2.75006	2.90222	3.28689	2.83526	3.00921	2.96204	2.93154	2.8278	2.85896	2.90251	2.85479	2.87529	2.85805	2.88614	2.89546	2.90129	3.21849	3.19969	2.93071	3.1172	2.74728	3.09033	3.07247	3.24539	2.81494	3.28578	2.91024	2.63933	2.86723	2.89314	2.30145	3.48675	3.11961	3.11216	3.27899	3.18187	3.12953	3.11845	3.48226	2.78145	2.74003	2.94443	3.04358	2.89987
AP000347.2	3.44464	3.50687	2.9464	3.50942	3.45895	3.63743	3.49506	3.4487	3.17011	3.56096	3.14826	3.28905	3.14852	3.29547	3.14429	3.21689	3.24809	3.39437	3.38761	3.34039	3.55679	3.90247	4.2459	3.39549	3.4647	3.75095	3.69715	3.9684	3.51997	3.53286	3.26282	3.23828	3.412	3.60227	3.95904	3.02295	3.25685	3.18743	3.24401	3.6957	3.70469	3.27667	3.14429	3.4042	3.28302	3.24559	3.51823	3.33602	3.55555
AP000462.1	3.48093	4.06702	3.78338	3.1649	3.41936	3.50963	3.72923	3.51646	3.51915	3.677	3.50062	3.48054	3.48889	3.59414	3.47763	3.49998	3.44669	3.45855	3.47432	3.66949	3.37336	3.56843	3.5134	3.39906	3.38471	3.67285	3.2077	3.05165	3.0243	3.52572	3.06962	4.08488	3.7201	3.84184	3.59224	3.77297	3.88933	3.30098	3.36687	3.3874	3.99404	3.51098	3.76535	3.35262	3.50292	3.46924	3.72535	3.41177	3.97477
AP000473.8	3.59288	4.20645	4.56536	4.60987	4.6802	4.97706	4.67679	4.63013	4.64839	4.53569	4.43673	4.4354	4.39467	4.50824	4.4766	4.53206	4.48274	4.49549	4.46024	4.44172	4.38639	4.2041	4.14161	4.3617	4.2655	4.99376	4.63656	4.35885	4.72435	4.18253	5.29114	4.6822	4.68324	4.81022	5.02923	4.61456	5.02151	3.87056	4.27201	4.32264	4.48898	3.94607	4.93495	3.72362	4.40055	4.27688	4.34526	4.08904	4.41146
AP000525.9	4.90489	5.72056	5.02369	4.94132	4.01103	5.22361	5.10363	5.35024	5.29362	4.85063	4.95981	4.99201	4.96352	4.85722	5.29674	4.89717	4.88211	4.99942	4.96289	4.91339	4.84401	4.30065	4.64521	4.95824	4.97868	4.33308	4.33048	7.36076	5.25279	4.76173	4.39364	5.56185	5.31335	4.97004	4.34487	5.21653	4.80678	5.21131	4.73232	5.07714	4.81914	5.38441	5.27153	5.5119	5.02637	4.84806	3.82603	5.0732	4.73885
AP000696.2	4.91893	4.48425	4.68626	4.68406	4.99564	4.4163	4.68241	4.89871	4.49029	4.50303	4.70179	4.79907	4.77983	4.69716	4.75081	4.75488	4.83249	4.72313	4.8206	5.04398	4.77089	4.43846	4.42233	4.74026	4.79039	5.26177	4.67696	4.11692	4.37312	4.47639	4.14018	5.68498	4.6017	4.53984	4.85785	4.76575	4.2333	4.75434	4.59407	5.00899	4.059	4.72914	5.31379	3.98639	4.66648	4.62261	4.80678	4.9507	4.98027
AP001063.1	4.09973	4.6595	3.9703	4.25004	4.5038	4.39847	4.13929	4.27835	4.25198	4.45361	4.38245	4.30575	4.45223	4.39068	4.32286	4.41613	4.33429	4.28933	4.25272	4.3495	4.22466	4.12284	4.13873	4.44481	4.19497	4.04569	4.49139	3.76983	4.18913	4.38432	4.60538	4.70362	4.09764	4.25069	3.64989	4.83026	4.34677	3.96995	4.82597	4.46046	3.63968	3.96294	4.47935	4.41934	4.57552	4.70279	4.51393	4.42045	4.33066
AP001171.1	4.09993	3.48073	3.26176	3.75262	4.18522	3.74811	3.97314	3.92366	3.97495	3.98069	3.55319	3.49294	3.46853	3.72748	3.66504	3.73524	3.78439	3.58368	3.61441	3.63968	3.53246	3.57698	3.66841	4.12898	3.26378	4.68706	3.24309	3.39699	3.82009	3.99251	3.71565	4.03896	3.41601	3.78338	3.71889	3.53517	3.84871	3.99968	3.3358	3.81416	4.10176	3.55319	3.87595	4.00941	3.33691	3.93271	3.52082	3.85555	3.84948
AP001189.4	3.78116	4.35474	3.44622	3.55211	4.04002	3.83186	3.39096	3.50419	3.60787	3.39658	3.88119	3.96822	3.87557	3.91411	3.88309	3.8856	3.948	3.90793	3.82945	3.89186	3.6873	3.58562	3.79817	3.60119	3.48633	4.43981	4.3284	3.48612	3.93709	4.49549	4.16752	3.69289	4.44327	3.99233	3.7372	4.11692	4.08603	3.61751	3.67937	3.98341	3.41465	4.18931	3.42436	3.7668	3.44645	3.83354	3.4429	3.73586	3.66841
AP001462.6	4.85807	4.56934	4.98436	4.92456	4.25559	4.15476	4.20795	3.88214	4.28437	4.77373	4.61707	4.6093	4.62556	4.6015	4.49324	4.55244	4.65537	4.53962	4.40305	4.46063	4.56629	4.72055	5.14146	4.99041	4.51316	5.55024	4.55655	4.25833	4.67122	4.68802	4.2548	4.58633	5.42515	4.96922	5.08908	4.48142	4.86065	4.71689	3.74692	3.9755	4.71465	4.57349	4.83188	4.83188	5.41713	3.99013	4.39146	4.21324	4.39579
AP001605.4	3.8355	4.16214	3.82435	4.00084	3.99787	4.09129	4.12641	4.00174	4.11474	4.1717	4.00299	4.07725	4.01541	3.97609	4.00722	4.02759	4.04038	3.74692	3.74871	3.96275	3.86309	3.74494	3.85884	3.98399	3.94666	4.44058	4.29991	3.81903	3.6252	4.44736	4.38728	4.20736	4.2459	4.40696	4.18576	4.42531	4.0336	3.7195	4.17507	4.05681	4.30712	3.55592	3.5534	3.72471	3.61189	3.6921	3.8064	3.74259	3.87844
AP001630.5	4.98901	5.15966	4.79885	4.29489	4.78066	4.73621	4.73055	4.70779	4.68643	4.73271	4.67378	4.6956	4.72459	4.72376	4.75123	4.79412	4.84385	4.82662	4.74859	5.03865	4.84447	4.72196	4.64818	4.98507	4.6698	4.23715	4.63811	4.04879	4.54326	4.81003	4.84542	5.21939	4.14831	5.34955	4.26093	4.71064	4.93615	4.40602	4.73538	4.39654	4.92858	4.84262	5.53449	4.46803	4.82844	5.13847	5.0125	4.89598	5.27863
AP006216.10	3.22736	3.36754	3.37966	2.8622	3.28099	3.24261	3.41376	3.09998	3.42587	3.21229	3.07068	3.1523	3.06522	2.86137	2.9687	2.98542	2.95716	3.21469	3.11261	3.32456	3.45938	3.79025	3.64494	3.40741	3.46006	3.18148	3.76371	3.46509	3.35338	3.23828	3.60037	3.55384	3.65156	3.16517	3.24171	3.11988	3.24899	2.96417	2.87562	2.74069	3.16609	3.11355	3.10631	3.03094	3.17635	3.20906	3.50963	3.27456	3.43369
AP006222.2	5.66853	4.94403	4.53831	4.69139	4.77625	5.31615	4.72313	4.82642	4.73906	5.18131	5.15402	4.83502	4.88789	5.0909	5.0893	4.95399	4.85845	4.92032	4.88435	5.05059	4.90553	5.16389	5.22442	5.1478	5.0626	5.60857	5.34058	4.51238	4.86753	4.46174	5.00322	5.13542	4.38505	5.09113	4.87935	5.65649	5.22462	4.74797	4.62458	4.93784	4.73428	3.93122	4.77168	4.61317	5.13825	5.04037	5.52195	4.74729	5.44604
AP006547.3	4.92858	5.69539	5.04833	5.04666	5.07649	4.80097	5.03424	4.94986	5.07798	4.98999	4.97478	5.23842	4.99182	4.94951	5.01163	5.05	5.05993	5.01091	5.04248	5.29226	5.06869	4.89669	5.01002	4.96749	5.10249	4.8629	5.06322	4.92636	4.62556	5.80721	5.91389	5.76115	4.99667	5.35503	5.24097	5.31021	5.32641	4.84146	5.05685	4.79558	5.04647	5.21826	4.90858	4.75066	4.45543	5.13458	4.59751	5.14355	4.8837
AP1AR	3.99474	3.09059	3.85843	3.65309	3.37783	3.55881	3.61211	3.13157	3.62006	3.6865	3.60641	3.4478	3.73248	3.8247	3.68094	3.6959	3.62069	3.73603	3.66885	3.15699	3.51935	3.36782	3.2079	3.55445	3.65374	2.23822	2.88037	4.04606	3.85843	3.25635	3.29996	3.83953	4.26696	2.72144	3.53759	3.6849	3.84319	3.91173	3.51126	4.06185	3.45409	3.58918	3.724	3.79462	4.28049	3.94512	4.06077	3.58069	3.15983
AP1B1	6.12719	6.64226	6.53062	6.61067	6.20848	7.15315	6.44125	6.69105	6.50341	6.44288	6.80054	6.80707	6.73192	6.43376	6.41441	6.44955	6.50079	6.6316	6.52984	6.72307	6.58389	6.8956	6.96634	6.57135	6.53552	7.01124	6.64558	6.27943	6.76345	7.08445	6.84701	6.57499	6.46096	6.92247	6.26664	6.58672	6.49615	6.8797	6.74425	6.52552	6.32354	6.50557	6.15255	6.36252	5.87892	6.34869	6.08871	6.88745	7.03433
AP1G1	6.27175	5.52364	5.83867	6.17353	5.95444	6.0102	5.82484	6.06751	5.97698	6.1247	6.05995	6.00965	5.88164	6.07862	6.00616	5.98935	5.99959	6.04472	5.9358	6.01413	6.10948	6.10229	6.00557	5.90897	5.98935	5.44911	5.63592	7.11494	6.43483	5.41336	5.78601	6.24583	6.47364	5.8474	5.88506	5.97395	5.71776	6.30266	6.01443	6.1247	6.10109	5.81299	5.64241	5.78627	5.804	5.62336	5.91994	6.12687	5.9745
AP1G2	4.97791	5.49363	5.42783	4.71444	4.80816	4.98436	5.00956	4.83422	4.92636	5.03068	5.26001	5.32597	5.13632	4.91832	4.96603	5.00869	5.00552	5.00571	4.93698	5.11556	4.92817	5.20925	5.26364	5.14961	5.04315	6.26356	5.08852	5.33406	4.97619	5.58374	5.20736	4.96273	4.71405	5.40834	5.16157	4.70439	5.00734	5.25646	5.30908	4.87257	5.27682	4.88664	4.71002	5.00195	4.54725	5.1694	4.88601	5.13335	5.05827
AP1M1	6.32206	6.44626	6.45793	6.78817	6.47988	7.32602	6.68961	6.46771	6.67243	6.58086	6.93586	6.90246	6.73347	6.66864	6.69739	6.69774	6.74857	6.82662	6.74031	7.04105	6.8177	6.90805	6.70649	6.62973	6.6375	7.08684	7.17519	6.43233	6.76476	7.05033	6.97957	6.23816	6.41753	6.85447	6.96693	6.72556	6.60188	6.69739	6.42541	6.68739	6.44563	6.36835	6.25102	6.80216	6.42159	6.06539	6.06605	6.7972	6.98088
AP1M2	5.23326	5.98644	5.59037	4.64602	5.17707	5.1538	5.44076	5.59314	5.51763	5.14461	5.1205	5.44367	5.35607	5.16493	5.1662	5.32686	5.19482	5.18174	5.19217	5.51665	5.1809	5.02576	4.8458	5.17899	5.26391	6.29121	5.0123	6.64669	4.87194	6.00787	5.38616	5.77886	4.56553	5.67149	5.00301	5.42424	4.82556	5.31937	5.12723	5.00798	4.61317	5.24318	5.06781	5.00919	4.85387	5.67202	5.15359	5.34566	5.13189
AP1S1	4.66591	4.60231	5.16536	5.70495	5.19609	5.69985	5.25961	5.12852	5.20624	5.0406	5.13868	5.40786	5.24016	5.11453	5.22275	5.25097	5.17661	5.21396	5.18025	5.34705	5.13996	5.08745	5.25543	5.17707	5.0502	5.20602	4.72937	5.32345	4.9429	5.58155	5.5595	5.323	4.70201	4.5038	4.79698	5.13542	4.69657	5.43525	5.44793	5.10451	5.23112	5.09608	5.36195	5.29298	5.70365	5.37044	4.53729	5.16536	5.75366
AP1S2	8.15293	8.27266	8.55657	7.72762	8.2019	7.0385	8.04162	8.03187	8.01034	8.30132	8.06467	7.8383	8.031	8.11119	7.93204	8.1795	7.89036	8.24184	8.12944	7.37101	8.12424	7.95713	7.83308	8.09182	8.00782	6.51188	7.2905	7.82346	7.91842	7.5989	7.32436	8.40371	8.30341	7.4342	7.84134	7.75535	7.91332	8.52803	8.85713	8.27266	8.36597	8.1189	8.26456	7.9641	8.00616	8.11024	7.94187	8.51553	7.72762
AP1S3	2.95485	3.08989	2.71813	2.80831	2.8697	2.60344	2.81051	2.64901	2.75665	2.94558	2.84402	2.93846	2.84901	2.7763	2.75294	2.80957	2.77916	2.77882	2.75138	2.728	2.8317	3.03511	2.83805	2.80153	2.88474	2.81919	2.79578	3.64494	2.97439	2.90478	2.70923	3.32694	2.56101	2.77662	2.84372	2.69058	2.67455	3.72667	2.96363	2.79237	2.51838	2.926	2.66086	2.97065	2.82627	2.8641	2.76917	2.75176	2.79935
AP2A1	4.91585	5.60722	5.29298	4.83963	5.06322	5.08491	5.10513	4.99182	5.1513	4.93558	5.11453	5.35585	5.18307	5.0442	5.09184	5.14307	5.12703	5.14741	5.04647	5.40222	5.12625	5.37581	5.30345	5.15486	5.15507	5.11497	5.36399	4.60517	4.90384	5.23178	5.30778	4.46174	5.25213	5.73258	4.99713	5.2858	5.2952	5.25692	5.45104	4.93138	4.99772	4.69139	5.01474	4.70068	4.82804	4.90153	5.22668	4.92558	6.11215
AP2A2	6.26602	6.90365	6.35465	7.01259	6.50264	7.15492	6.62322	6.86125	6.66078	6.81849	6.94639	6.83503	6.8275	6.64377	6.73117	6.76182	6.67484	6.74896	6.84297	6.85125	6.73779	7.06653	7.15009	6.719	6.71193	7.4639	7.23075	6.81556	7.07132	6.91747	6.80216	6.58599	6.52057	6.96783	6.78504	6.6272	6.67872	7.02683	6.8026	6.52133	6.42575	6.63446	6.54556	6.57025	6.41753	6.42083	6.22868	6.82092	7.02443
AP2B1	8.15965	7.99552	7.6064	7.48442	8.07994	7.49398	7.72701	7.59761	7.80258	7.47658	7.46339	8.15587	7.56749	7.78828	7.88259	8.27266	7.9548	7.70802	7.56869	8.09536	7.6173	7.68773	7.78572	7.95404	7.68841	7.12597	7.26999	8.02039	6.75096	7.90163	8.32497	7.21917	7.37774	7.97273	7.90004	7.8472	7.39004	8.70536	8.75016	7.76508	7.61283	7.89113	7.86644	7.74227	8.78436	7.06695	7.11831	6.9189	8.031
AP2M1	8.66072	9.22464	8.86028	10.1488	9.07544	9.14999	9.15218	9.97951	9.2326	9.41614	9.40058	9.58324	9.4359	9.28795	9.4359	9.3918	9.33677	9.45446	9.31915	9.46945	9.42119	9.52261	9.27728	9.25046	9.36678	9.56077	9.81361	9.24263	9.02057	9.46945	9.72709	8.43641	8.6271	9.00252	10.2614	9.39625	9.51054	8.9743	9.36453	9.23441	9.22464	8.85713	9.25868	9.29382	9.49875	8.96116	9.05685	9.19335	9.87179
AP2S1	8.37522	8.69914	8.44832	9.18371	8.32098	9.20503	8.55657	8.91975	8.61241	8.71365	8.95807	9.17327	8.9181	8.73613	8.73871	8.71189	8.82136	8.85435	8.77515	9.00549	8.7306	8.98382	9.03094	8.67335	8.67477	9.51524	9.17327	8.29439	8.79985	9.3918	9.24862	8.17504	8.34263	8.84109	8.90475	8.59387	8.59777	8.74596	8.91975	8.54234	8.77515	8.8198	8.7306	8.50658	8.70185	8.5486	7.94726	8.68176	9.24074
AP3B1	5.61406	5.77109	5.62069	6.63968	6.11714	6.25537	5.96918	6.35657	6.0466	6.02511	6.08456	6.18999	6.00937	6.14213	6.14406	6.215	6.19101	6.24846	6.15681	6.19608	6.11622	6.10861	5.90924	6.03455	6.09961	4.90698	5.74763	5.82766	5.36108	6.50983	6.67908	6.26455	5.64945	5.69233	6.08333	6.37073	6.27905	6.3877	6.42401	5.89953	5.94959	6.24908	6.27333	6.20823	6.27804	5.72232	6.03809	6.3877	6.10015
AP3B2	3.1944	3.56843	3.05443	3.1969	3.18509	3.37248	3.17509	3.10895	3.32917	3.34443	3.26615	3.27102	3.27456	3.19241	3.37271	3.18214	3.18891	3.18592	3.2447	3.20695	3.22986	3.62234	3.32963	3.1172	3.12694	3.4895	3.56485	3.56549	3.36312	3.47453	3.47517	3.34017	3.14652	3.69133	3.37029	3.11765	3.09631	3.26808	3.02459	2.8981	3.01299	3.12419	3.19708	3.15477	3.17011	3.95185	3.23311	3.07042	3.15255
AP3D1	7.94351	7.75183	7.66173	8.48618	7.3923	8.03913	7.73957	8.07498	7.76436	7.78336	7.87235	8.02757	7.83675	7.92158	7.99878	7.97105	7.98995	7.98609	7.77012	8.12852	7.97515	7.52798	7.47589	7.54533	7.87595	8.24184	7.68582	7.88869	7.12418	8.44416	8.63683	7.99227	8.19903	8.68428	8.12597	8.24841	8.33678	7.77505	7.8994	7.6192	7.39626	8.031	8.2009	7.32494	7.17933	7.89328	7.81253	7.46282	7.76298
AP3M1	6.74031	6.15954	6.55776	6.18259	6.6767	6.40543	6.43079	6.82012	6.49615	6.58159	6.49191	6.41601	6.3118	6.46696	6.49328	6.5105	6.5341	6.50557	6.43839	6.53225	6.5052	6.63599	6.61679	6.61327	6.37282	6.72346	6.65965	7.12857	6.85209	6.43453	6.84377	6.29922	6.46415	6.25412	6.52057	6.08122	6.30934	6.33553	6.44196	6.27905	6.58239	6.21373	6.12106	6.49041	6.36978	6.37867	6.39188	6.08871	6.08303
AP3M2	5.63493	4.87953	6.089	5.43546	6.02511	5.58102	5.84315	6.01384	5.81712	5.804	5.56581	5.58626	5.53277	5.59814	5.46629	5.57883	5.5467	5.5205	5.44007	5.63107	5.46585	5.71174	5.67992	5.67026	5.61951	5.70236	5.99606	5.27998	5.48794	5.79867	5.85395	4.82556	5.62756	5.92637	6.24279	5.1777	6.18414	5.28835	5.49745	5.63616	6.08702	5.57553	5.8727	5.32179	5.67893	5.31379	5.77807	5.11169	5.74557
AP3S1	10.059	10.4703	9.18371	10.048	9.80506	9.45689	9.85913	8.52458	9.89034	10.0957	9.94389	9.92538	9.97647	9.98689	9.99347	10.1023	9.91299	10.01	10.1341	9.85038	10.1488	9.86524	10.0443	10.0303	10.0819	8.78159	9.03895	10.3047	10.2912	8.59162	8.92603	10.2101	10.118	7.99552	9.75513	9.2326	9.40505	10.553	10.3281	9.81361	10.0819	10.1341	10.2912	9.98277	10.4754	9.97344	9.95085	10.2912	10.1456
AP4B1	5.23755	4.57513	5.13679	4.64941	4.88946	4.79952	4.79331	4.956	4.76052	4.88043	4.8837	4.87214	4.86895	4.689	4.64903	4.70594	4.66514	4.86625	4.88523	5.0184	4.81207	5.02815	5.12763	4.90366	4.92218	5.29807	5.31451	4.3153	4.99713	4.75895	5.24036	4.71166	4.62716	5.15001	5.01801	4.61838	5.12978	4.60872	4.8631	4.98799	5.08374	4.94669	4.87112	4.89247	4.93307	4.73951	5.19654	4.33943	4.76889
AP4E1	3.87151	3.57496	3.61457	4.27182	4.07414	3.57747	3.79082	4.17486	3.7424	4.00156	3.72629	3.74025	3.74081	3.74712	3.77198	3.72967	3.75037	3.67188	3.7105	3.58605	3.73305	3.98194	3.919	3.78315	3.81228	3.8843	3.86287	4.24839	3.69836	3.96505	3.98807	4.08603	3.99291	3.81354	4.1108	3.99947	3.77478	3.70819	3.92828	3.68409	3.96769	3.94568	3.60165	3.79503	4.16824	3.53804	3.39166	3.25307	3.66363
AP4M1	5.79131	5.1534	5.17327	5.59814	5.46723	5.46074	5.57883	5.53449	5.56185	5.13825	5.5525	5.49903	5.53172	5.52527	5.61741	5.53923	5.50192	5.49903	5.45058	5.49463	5.46699	5.53615	5.47208	5.42947	5.50746	5.69671	5.39545	5.63265	5.53449	4.81914	5.47367	5.18882	4.73928	5.2757	5.48602	5.42015	5.64165	4.85226	5.63639	5.14397	4.75163	5.36332	5.77667	6.15006	6.17284	5.8894	5.88664	5.27975	5.39049
AP4S1	5.92176	4.87001	5.49534	5.92909	5.69906	5.79809	5.71484	5.85329	5.63317	5.68821	5.57883	5.46148	5.59087	5.66977	5.54462	5.65075	5.58676	5.57072	5.75878	5.41945	5.67992	5.54971	5.66633	5.81299	5.68715	5.45293	5.55125	4.85517	5.85482	5.30327	5.50236	5.58749	5.71537	5.37212	5.99578	5.47427	5.70626	5.47497	5.5595	5.53664	6.20043	5.55545	5.79531	5.26293	6.33123	5.59544	5.97887	5.07476	5.2258
AP5B1	3.67325	4.36377	3.67792	3.96616	3.89205	4.17819	3.7524	3.50526	3.91152	3.83531	3.64893	3.88368	3.5898	3.97897	4.00193	3.96734	4.00832	3.83609	3.88194	3.9566	3.99992	4.09379	4.26075	4.14773	3.77256	3.77798	4.05826	3.88214	3.74044	3.91335	3.70913	4.32781	4.24305	3.63531	4.13641	3.84037	4.33691	4.12096	4.22377	3.77178	3.67093	3.97912	3.85103	3.21026	3.22986	4.56517	4.00813	4.1127	3.9157
AP5M1	6.12565	6.2375	5.91903	5.29158	5.85531	5.94096	6.09743	6.12073	6.14153	5.96302	5.72607	5.58702	5.74268	5.79401	5.79945	5.8689	5.76115	5.83059	5.86276	5.47007	5.83456	5.81712	5.76692	5.96421	5.94413	5.70084	5.76115	5.95784	5.77749	5.56474	6.17032	6.118	6.45213	5.95701	5.75229	5.7323	5.48361	5.63739	5.32019	5.58726	6.32751	5.79999	5.98834	5.99283	6.66487	5.73724	6.10524	5.50023	5.29386
AP5S1	6.18259	6.90893	6.38562	6.83672	6.09133	6.33851	6.62173	6.13121	6.53447	6.33123	6.30477	6.70649	6.41681	6.36347	6.43311	6.55658	6.48732	6.54299	6.3011	6.86036	6.35587	6.85371	6.91059	6.29507	6.40399	7.37046	6.75931	6.5341	6.30301	6.98184	7.08637	6.61568	6.47644	7.17778	6.46661	6.49328	6.35856	5.83509	6.61408	6.24683	5.992	6.17284	6.4699	6.37351	6.10494	6.29378	6.1461	6.05808	6.69651
APAF1	4.14369	3.5628	3.78726	4.5721	4.4908	4.43356	4.16326	4.09862	4.05111	4.33488	4.21742	4.09033	4.21742	4.33257	4.2913	4.15916	4.16737	4.26093	4.31202	4.03857	4.22321	4.18465	4.09535	4.28513	4.20718	3.56385	3.50461	4.87152	4.42569	3.95578	3.58918	3.90591	4.4711	3.69899	4.2722	4.29096	4.31257	4.60676	4.61673	5.07076	4.44642	4.42856	3.88368	4.58297	3.87037	4.11748	3.85612	4.242	3.64773
APBA1	5.25279	5.97967	4.90718	4.95561	5.12723	4.86683	5.23627	4.92338	5.31357	4.67906	4.96622	4.98656	5.0221	4.99376	5.01859	5.1205	5.0976	5.02693	4.96922	5.23542	5.28043	5.50236	5.38774	5.268	5.16007	4.96022	5.18353	4.47396	5.00381	5.41692	5.49857	4.41459	4.59935	5.75149	5.53323	5.33848	5.61826	5.36711	5.25847	5.39224	4.97379	4.59895	4.81396	4.87698	4.97338	5.1559	5.29226	5.14848	5.60186
APBA2	4.86083	6.15747	4.99504	5.18862	5.22711	4.82122	5.25521	5.23456	5.11638	4.94443	5.18111	5.2627	5.2587	5.12414	5.17111	5.21851	5.15778	5.16389	5.24183	5.35177	5.2902	4.80034	5.00956	5.12435	5.21739	6.10287	5.01859	4.67999	4.84958	5.32134	4.93971	5.76745	5.29966	6.29283	4.99104	5.13805	4.67217	5.2858	5.24205	5.45407	4.83401	5.19263	4.90023	5.23932	4.44404	5.17347	4.5796	5.67622	5.49339
APBA3	6.20536	5.97615	5.84896	5.94825	5.65466	6.11563	5.92909	6.06482	5.84176	5.81197	6.14035	6.03724	5.89772	5.76951	5.94216	5.95104	5.90168	6.00908	5.98255	6.08456	5.87836	6.22838	6.41601	5.85822	6.01109	6.8878	5.86606	5.81792	6.26512	6.2193	6.04015	6.19034	5.506	5.98644	6.06669	5.35966	5.85611	5.86606	5.98111	5.96977	6.30896	5.95501	5.65912	5.90821	6.09534	5.90951	5.68843	5.63969	5.82484
APBB1	5.49723	6.08365	5.15195	5.50623	5.8392	6.01183	5.89927	5.67313	5.77912	5.51484	5.70964	5.92576	5.78376	5.49241	5.53664	5.68921	5.551	5.74133	5.65803	5.99051	5.59944	5.90401	5.90951	5.80802	5.47427	6.26056	6.48352	5.10185	5.20782	6.08788	6.00387	5.79322	5.17067	6.3514	5.87761	5.4626	5.56228	5.3685	5.6962	5.69956	5.77177	5.31138	6.1238	5.54416	5.37446	5.38506	5.63739	5.70911	6.09366
APBB1IP	4.37009	5.05805	4.40305	4.63855	4.66357	5.76856	4.57767	4.49854	4.48898	4.96729	5.31863	5.06281	4.70817	5.05122	5.0946	4.91713	5.23112	4.86396	5.00899	4.93265	5.0719	4.95278	5.0946	4.68781	4.84401	4.84901	5.13588	4.64637	5.12703	4.94728	4.62935	4.30922	4.66233	5.43641	5.5038	5.23281	4.67832	4.82965	4.89639	5.52585	4.71042	5.36825	4.12641	4.97988	4.10087	4.97791	4.34169	5.03924	5.0167
APBB2	6.16206	6.39574	5.50504	5.96534	5.53323	5.54186	5.76245	5.95158	5.90047	5.81356	5.81356	5.87734	5.8474	5.74815	5.89395	5.82431	5.78946	5.88191	6.01083	6.02134	5.91903	5.93747	5.91874	5.86063	5.81356	5.95301	5.44816	6.30831	5.31725	5.93108	5.48532	6.35247	5.543	5.6797	5.80992	6.53844	5.53323	5.9923	5.51789	5.7101	5.12089	6.35997	5.89868	6.02511	5.99428	6.25919	5.89689	5.99344	6.02844
APC	5.29715	4.53261	4.69375	4.87972	5.35677	4.32571	4.99812	4.85063	4.99041	4.98329	4.70672	4.81791	4.74114	5.01046	4.93558	4.95843	4.84765	4.95723	4.85498	4.66886	4.94008	4.80209	4.60031	4.94669	4.86007	3.13365	4.66454	4.94419	4.5038	4.25961	4.96481	4.37881	5.77005	5.3239	5.12546	4.82804	4.909	4.98436	4.63636	5.35742	5.29628	4.76689	4.77843	4.91274	5.24295	4.66189	5.17962	4.67418	4.77513
APC2	5.07054	5.64543	5.51139	4.68279	5.06016	5.07816	5.0616	5.01457	5.12914	4.9479	5.10556	5.2685	5.10273	5.16049	5.18927	5.24274	5.27594	5.15107	5.07838	5.44032	5.19288	5.36782	5.33719	5.12174	5.11231	5.41245	5.04315	4.87356	4.97066	5.60804	5.38378	5.86087	4.79679	5.24445	4.64169	5.1211	4.99085	4.78524	5.37744	4.89133	5.09184	5.02923	5.11453	5.07343	4.94828	5.64141	4.7964	6.03809	5.68115
APCDD1	7.65581	7.1102	8.16043	7.57391	7.02495	8.52458	7.54608	7.85017	8.03353	8.25531	7.88259	7.53524	7.88102	7.56234	7.83467	7.70867	7.41958	8.02429	7.74093	7.76162	8.11641	8.21944	8.37962	7.53524	7.78897	8.60512	8.23891	7.98609	7.93651	7.30846	7.54665	8.10942	8.10143	7.32202	7.6298	8.04575	7.69189	8.27744	7.66627	7.61984	7.02592	6.65265	7.26525	7.49227	7.725	8.4148	7.20179	7.03983	7.64727
APCDD1L	5.18633	5.54997	6.02166	5.04544	5.08158	5.33288	5.49488	5.45199	5.63616	4.92319	5.14826	5.44247	5.49289	5.101	5.30147	5.38465	5.28502	5.5581	5.12783	5.56275	5.37352	5.58426	5.42968	5.25911	5.31863	5.48339	6.18318	5.59294	5.0188	5.28697	6.21183	4.81626	5.18611	4.96839	5.04854	5.97665	6.13323	5.08432	5.66531	5.07964	4.86777	5.05	5.36952	4.856	5.24932	5.22338	5.14826	5.2858	6.01208
APCDD1L-AS1	3.83625	3.93193	3.80261	3.84968	3.85922	3.85965	3.82451	3.79522	3.77314	3.97296	3.76391	3.78911	3.77975	3.80755	3.8247	3.82659	3.77394	3.8009	3.73305	3.82603	3.82009	4.05492	4.06112	3.89241	3.56155	4.11098	4.33469	3.65718	3.84518	3.77975	3.87513	3.81823	3.91223	3.86483	3.90756	3.73286	4.08976	3.77077	3.91429	3.69393	3.73087	3.58627	3.86464	3.58389	3.84599	3.81043	3.85103	3.93744	4.33632
APCS	4.01298	4.76273	4.62478	4.0076	3.98455	4.26931	4.14272	3.93632	4.00576	4.05357	4.15002	4.15309	4.16864	4.205	4.21956	4.28513	4.26507	4.18874	4.18596	4.21235	4.09936	4.22932	4.18726	4.30178	4.13948	4.1559	4.37213	3.88733	3.95146	4.83106	4.06569	4.81264	3.60476	4.01103	3.94529	4.47225	4.00044	4.30105	4.13796	4.13285	4.26302	4.12493	3.89846	3.69715	3.87269	4.5218	4.12584	4.68324	4.81997
APEH	6.19702	6.15778	6.50341	5.56876	5.64091	5.82029	5.8894	5.80538	5.88084	5.89819	6.01737	6.22688	5.98228	5.86473	5.91513	5.91513	5.98471	6.05073	5.77005	6.38954	5.8689	6.21692	6.13593	5.9923	5.95131	6.78157	6.21155	5.45962	5.65676	6.39957	6.24618	6.09565	5.21442	6.53767	5.99752	5.86113	5.81018	5.44527	5.67759	5.82659	5.84151	5.95416	5.70522	5.65002	5.53591	6.11064	6.04944	5.86775	6.5159
APELA	2.66426	2.40443	2.68018	3.04713	2.75555	2.38092	2.53693	3.55445	2.62919	2.40848	2.41914	2.46431	2.41914	2.48093	2.39047	2.51338	2.37016	2.53885	2.50613	2.55763	2.23822	2.53093	2.63428	2.25546	2.16068	2.70554	2.29802	3.02987	2.64327	2.60489	3.04493	2.44372	2.55937	2.83138	2.59249	2.56561	2.437	3.0879	2.57882	2.5863	3.22278	3.04443	2.80989	2.45327	2.728	2.50986	2.41002	2.73166	2.04373
APEX1	9.55077	10.0819	9.55077	9.07912	9.04352	9.37123	9.46204	9.9005	9.35837	9.41864	9.44072	9.55077	9.26248	9.59867	9.45689	9.33233	9.56308	9.50578	9.25654	9.56308	9.44957	9.81991	9.61591	9.4828	9.49875	9.03094	8.96766	9.9599	9.68135	9.31071	8.92763	9.08078	9.11236	8.9392	9.758	9.63704	9.59612	9.26694	9.17501	9.69243	9.68708	9.57817	9.25247	9.49433	9.58324	9.52014	9.46436	9.10338	9.41614
APEX2	5.04037	5.70084	5.27884	5.16645	4.6962	5.17572	5.21421	5.4995	5.24999	5.03443	5.09254	5.131	5.06843	4.9963	5.08705	5.10473	5.08974	5.14761	4.94306	5.2076	4.8919	5.41513	5.45175	5.02597	5.08787	5.38774	5.68715	5.27058	5.7101	5.19593	5.77541	4.99667	5.19698	4.94564	5.1788	4.9399	5.21025	4.70179	4.90576	4.91918	4.82158	5.17154	4.95786	5.18773	5.08643	5.11535	5.06562	4.7256	5.2925
APH1A	5.65245	5.36998	5.69313	6.383	5.55905	6.31635	5.60722	5.76405	5.65728	5.72183	5.83214	6.04416	5.90875	5.99985	5.91794	6.00356	5.99138	5.99578	5.79076	6.14943	5.99811	5.85118	5.70522	5.64845	5.94096	3.89282	5.40101	6.0337	5.8138	5.40041	5.61997	5.49579	5.2005	4.9479	5.85742	6.2067	5.96617	6.36314	6.56192	6.07691	6.08456	5.65649	5.86863	6.186	6.29791	5.84126	5.88746	5.80048	6.22064
APH1B	6.24342	5.64618	5.73747	6.00816	5.61501	5.7078	5.88559	6.10077	5.85359	5.87654	5.8285	5.7961	5.79289	5.76667	5.77032	5.8091	5.80721	5.7868	5.73486	5.87135	5.84056	5.84639	6.09743	5.85171	5.81792	5.72937	6.08581	5.73179	6.22718	5.28292	5.37446	5.78736	6.14035	5.28768	5.83776	5.88535	6.34837	5.43036	5.58399	5.57458	5.88746	6.09395	5.86943	5.45009	5.53834	5.79585	5.65778	5.58605	5.8792
API5	5.46745	4.97949	5.43962	5.71537	5.11017	5.21521	5.38576	5.0893	5.42015	5.45339	5.36307	5.36825	5.27884	5.50305	5.42377	5.44987	5.44767	5.422	5.34753	5.35677	5.44032	5.33587	5.21629	5.41513	5.50092	4.37156	5.11718	5.79841	5.32641	4.55955	5.3831	5.17639	5.8138	4.55935	5.70236	5.78165	5.31138	5.41555	5.38151	5.5151	5.77382	5.63792	5.27218	5.16406	5.86332	5.16751	5.57913	4.92176	5.31998
APIP	5.23734	5.1742	5.49391	4.86027	4.99852	5.05933	5.19176	5.29495	5.00608	5.35988	5.12505	4.89228	4.96003	5.19785	5.00776	5.04439	4.9214	4.98006	5.08413	4.82883	5.04359	5.34934	5.48578	5.2543	5.22795	4.14693	4.71781	4.84806	5.38421	4.20199	4.41384	4.88311	5.49903	4.5814	5.42064	4.90114	4.93326	4.96539	4.95255	5.5	5.62634	5.14545	5.35344	5.2902	5.29586	5.23755	5.47762	4.91563	5.09781
APLF	3.52341	2.95572	3.35149	3.46404	3.11261	3.5167	3.25189	3.07297	3.4487	3.34492	3.30021	3.19023	3.31423	3.13209	3.23635	3.07016	3.09321	3.28099	3.3461	3.15	3.35364	3.28281	3.54506	3.35796	3.42264	2.78241	3.2923	3.6305	3.76352	3.13908	3.03672	3.64513	3.13157	2.68639	3.17982	3.27344	3.08495	3.11892	3.06677	3.05966	3.12627	3.21052	3.64989	3.55802	4.08884	3.75909	3.48889	3.31947	3.4305
APLN	5.14307	5.8362	6.67523	5.52847	5.79892	5.98736	5.80201	6.16051	5.8091	5.83678	5.64798	6.12409	5.72656	5.58229	5.71337	5.7047	5.74608	5.79375	5.63291	5.94041	5.4348	6.08581	5.89474	5.74868	5.62409	5.57072	5.72431	5.99283	5.51017	6.38366	6.38874	5.60857	5.07758	5.88274	5.51042	5.28675	5.82877	5.75286	6.49112	5.17661	5.68369	5.79809	6.4192	5.72633	6.02376	5.46443	5.66011	5.45609	6.30706
APLNR	7.57454	7.19073	8.87044	7.66805	6.81885	7.96953	7.71151	7.62721	7.64593	7.99621	8.07227	8.19553	7.35188	7.91612	7.70202	7.52589	7.70202	7.91332	7.55317	7.96568	7.80746	8.40067	7.85774	7.50521	7.79478	8.32497	7.60827	7.41602	7.24871	8.51444	7.83604	6.71193	6.64413	8.56854	7.11068	7.37046	7.39985	7.11929	6.94155	8.22211	7.59695	7.99143	6.93804	8.68854	7.93959	8.19454	8.01542	8.62964	8.84708
APLP1	6.63049	5.82277	5.88828	5.97725	6.0827	6.12959	6.09806	6.17032	5.9984	6.099	6.05382	6.58494	6.19892	5.85145	6.11304	6.283	6.05899	6.10287	5.89424	6.39779	5.78995	6.31412	6.58272	6.02999	6.05961	6.43909	6.16051	5.99636	5.91794	6.57232	6.74814	6.8026	6.19578	6.12719	5.83974	5.36152	5.25391	6.34231	6.32137	5.76481	6.00816	6.05662	6.35175	5.52339	5.90431	5.47007	5.65376	6.18259	6.6236
APLP2	7.34405	7.74696	7.4724	8.41999	7.78642	8.52011	7.97026	8.23431	8.07049	8.09354	8.01285	8.05874	7.93959	7.98317	7.96486	8.03522	8.01205	7.91404	7.83467	7.98539	7.99469	8.00873	7.76672	7.72628	7.91769	6.97873	7.38481	8.71512	8.12507	7.2109	7.09911	8.05248	7.73268	7.7137	7.95555	7.86855	7.9588	8.57315	8.22211	8.26456	7.64321	7.99552	7.47658	8.28139	7.69669	8.03692	7.73809	8.70536	8.2065
APMAP	7.89392	7.49464	7.61795	8.14081	8.2744	8.75558	8.105	8.71791	8.02833	7.97181	8.56956	7.95004	8.04331	8.02507	8.42228	7.90732	8.47813	7.93282	8.18316	8.031	8.13709	8.20548	8.63097	7.91769	8.04575	8.17175	7.82859	8.07914	8.3142	8.13377	7.89182	7.80413	8.75294	8.42619	8.33168	8.04242	7.93054	8.05581	8.22123	8.10673	7.53406	8.62576	7.54874	7.80955	7.2858	8.37962	7.4235	8.08772	7.67265
APOA1	5.30543	5.58399	7.85922	5.49903	6.57936	7.42401	6.3266	6.42126	5.92691	6.40301	6.84251	6.75652	6.13389	6.74031	6.30801	6.69573	6.99326	6.89865	5.82659	6.05217	6.47221	5.83678	5.78922	6.76267	6.16901	5.53566	5.58943	5.40512	6.19516	5.95239	6.65156	5.67622	5.7078	6.88307	6.96743	5.35387	5.51115	5.71174	7.0047	6.62649	7.88869	5.88387	6.68961	7.23513	8.27545	5.56777	5.85717	7.19418	8.35758
APOA1BP	9.44512	9.63967	9.53322	8.96451	8.7306	9.47228	9.20503	9.88115	9.30236	9.13771	9.4475	9.58815	9.53058	9.2796	9.31274	9.36025	9.32377	9.55077	9.33233	9.69527	9.11802	9.58324	9.40058	9.34963	9.33677	9.41614	9.11802	9.34759	9.10338	10.0628	10.1854	8.98382	8.4451	9.629	9.00864	9.31915	8.6423	8.88116	9.51054	9.3148	9.05193	9.28993	9.63967	9.3918	8.8982	9.53584	9.05855	9.29191	9.72709
APOA2	3.3136	3.52895	3.38023	3.05057	3.6503	3.2914	3.22486	3.53933	3.13935	4.35605	3.32386	3.44048	3.4024	3.3136	3.28779	3.37828	3.38349	3.38023	3.32151	3.38864	3.31536	3.09059	3.23998	3.20672	3.28689	3.86388	3.02172	3.20599	3.38495	3.66447	3.05569	3.30169	3.19508	3.4456	3.44352	3.24171	3.14775	3.28953	3.79483	3.53667	3.15405	3.24333	3.54699	3.36733	3.09321	3.25404	3.30623	4.15061	3.6461
APOA4	4.93971	5.35134	5.03825	4.59504	5.71105	5.09929	5.16668	5.2965	5.09805	5.10226	5.04439	5.28502	5.17111	5.11392	5.16406	5.22886	5.20539	4.95481	4.98436	5.28043	4.99182	4.69081	4.76513	5.23691	5.14185	4.88725	4.8327	5.38221	5.29674	5.57168	4.92798	5.42445	5.06843	5.09032	4.8629	4.14982	5.15154	5.74219	5.30589	4.6454	5.3063	5.24056	5.03068	5.09032	4.53011	5.34194	4.90615	5.63869	5.992
APOA5	4.75795	5.39159	5.36172	4.72216	4.82699	4.91893	5.03233	5.232	5.0243	4.84242	4.9686	5.08453	5.03254	4.85021	4.91933	4.96795	4.97557	4.99263	4.90615	5.21694	4.89293	4.93841	5.02753	4.93535	4.90287	5.55489	5.05615	4.51393	4.39924	4.95824	5.23586	4.95786	5.05558	4.63355	4.96273	5.06476	4.75635	5.04566	5.25412	5.07567	4.53924	4.69354	4.99648	4.53046	4.81126	4.86683	4.87657	5.18174	5.9485
APOB	4.89783	4.88685	5.78266	4.83945	5.80327	5.43816	5.19698	5.17796	5.06713	5.08888	5.169	5.1125	5.21985	5.10598	5.2076	5.54808	5.20736	5.30147	5.49723	5.04292	5.32819	5.13145	4.91296	5.49723	5.30035	4.68882	5.04248	4.72055	5.31043	4.17819	5.39327	5.45128	5.97252	4.66535	5.15847	5.27218	5.8792	5.27218	6.51334	4.7964	5.32157	4.78877	5.32255	4.58758	5.30011	4.53358	5.23951	6.01183	6.51223
APOBEC1	3.54834	4.22893	3.46211	3.56176	3.89646	3.77097	3.64258	3.51384	3.67504	3.43221	3.86368	3.84055	3.81612	3.87963	3.89092	3.80423	4.04639	3.68943	3.77738	3.87923	3.43772	3.79273	3.87096	3.44542	3.66582	4.47817	3.98175	3.8359	2.98835	4.44247	3.80615	4.07122	3.16698	3.63314	4.03621	3.85905	3.99324	3.78618	3.66083	3.73874	3.67504	3.86096	3.8563	3.28756	3.56777	3.86447	3.67895	3.5176	3.89132
APOBEC2	9.33931	9.52261	9.87179	8.45164	8.90475	8.86335	8.98382	9.96345	9.15801	9.00723	8.9804	8.9804	8.93078	9.21305	8.78436	9.29836	9.09985	9.0926	9.18021	9.37794	8.87983	9.38702	9.38478	9.15218	9.36453	8.46335	8.82534	7.99469	8.76515	8.78436	8.95641	8.78568	8.67055	8.6496	8.76515	8.57063	8.69369	8.13284	8.57315	9.51054	9.23884	9.57301	9.46945	9.99699	9.91299	9.56308	9.98277	9.544	9.47738
APOBEC3B	3.22809	4.55713	3.71232	3.71008	3.48869	4.08141	3.70291	4.27596	4.00156	4.2803	3.89517	3.69755	3.90006	3.869	3.82715	3.63568	3.55187	3.48093	4.43883	3.63531	3.74829	3.55824	3.23507	3.87576	3.60767	4.67217	4.03797	4.94728	4.38944	2.58094	2.56389	3.13391	3.61794	3.25448	3.8514	3.45175	3.57303	4.09439	3.58605	4.08088	3.79836	4.34395	3.98088	3.87727	3.87803	5.12001	3.82695	4.01965	3.65454
APOBEC3C	6.03724	6.88307	5.98774	6.42228	6.40578	7.06885	6.73383	6.99827	6.69345	6.51016	6.46886	6.61985	6.50382	6.53568	6.39338	6.51623	6.44666	6.54739	6.43159	6.54852	6.48204	6.77058	6.69531	6.28068	6.51738	6.96783	6.56043	7.0226	6.62061	6.88263	6.42401	6.50113	6.36449	7.34567	6.63559	6.07746	6.06669	6.1843	5.53687	6.50774	6.44955	6.63412	6.21565	6.67707	5.97532	6.52954	6.33194	6.90205	7.10054
APOBEC3D	4.059	3.89011	4.3303	4.29597	4.3732	4.36254	4.45543	4.82965	4.16771	3.89073	4.25725	4.27816	4.28513	4.12569	4.10277	4.08658	4.02097	4.11895	4.15515	4.18913	4.12549	4.19254	4.3094	4.3834	4.14001	4.36575	4.54607	4.46331	4.09187	4.17013	4.46174	4.68261	4.36629	4.22802	4.12584	4.07555	4.03027	4.31846	4.0781	3.90611	3.9394	3.86269	3.9491	3.40852	4.2807	3.81754	4.20103	4.38547	4.14331
APOBEC3F	5.51534	5.47899	5.29807	4.67437	5.1822	4.99483	5.17639	5.47993	5.17837	4.97599	5.08787	5.20843	5.15467	5.02304	5.02173	5.15107	5.16516	5.03047	5.08138	5.26045	5.06993	5.04359	5.25758	5.21238	5.14207	5.98911	5.31357	5.00046	5.30908	5.53969	4.69811	5.19675	5.31475	5.44478	4.68841	4.61043	4.91443	4.72937	5.04813	4.86815	5.3991	4.9538	4.83985	4.9491	5.28386	5.34635	5.13378	6.03426	5.37812
APOBEC3G	6.59631	6.53663	6.45926	5.57216	5.80699	6.17445	6.09565	6.39673	6.16603	6.50451	6.4101	6.45731	6.18903	6.09219	6.06696	6.23041	6.08788	6.25694	6.17067	6.21871	6.26874	6.23003	6.40509	6.15072	6.186	6.68108	6.57979	5.91794	6.31635	6.18541	6.32977	5.12196	5.32484	6.75337	6.36314	6.07802	6.22064	6.1238	5.70037	6.28502	6.37867	6.22807	5.76642	6.36029	5.83999	6.62535	6.52171	6.5234	6.34743
APOBEC4	2.97177	2.88671	3.36194	3.39232	3.16936	3.27431	3.16136	3.08733	3.20412	3.29896	3.2259	3.32244	3.21824	2.95002	2.95854	2.92386	2.94613	3.23483	3.30487	3.34372	3.25588	2.88353	3.42024	3.17359	3.1376	3.15699	3.30972	3.62105	2.75252	3.25041	3.96598	3.09437	3.18359	3.70489	3.75057	3.3474	3.30921	2.79612	2.76546	3.18187	2.95631	3.51893	2.75665	3.1709	3.31593	2.95168	3.30876	3.19554	3.22409
APOBR	4.56164	4.41862	4.23138	4.28144	4.12169	4.52584	4.03549	4.2134	4.05917	4.32264	4.67342	4.49286	4.5721	4.48329	4.61977	4.46157	4.40405	4.18576	4.3578	4.28365	4.18146	4.69159	4.57728	4.29096	4.09681	4.64637	4.23029	4.53941	4.36575	5.09504	4.37122	4.20332	4.08736	4.81417	4.22091	3.70913	3.93467	4.51238	3.97277	4.73538	4.26696	4.41495	4.41762	4.39796	3.85712	4.14249	3.84128	4.6015	4.67886
APOC1	6.30831	6.79635	5.3168	6.07257	5.86265	5.82927	5.84056	5.92374	5.79945	6.32354	6.36902	6.16083	6.11739	6.11123	5.81578	5.76458	6.12565	5.87814	5.93866	5.94362	6.25039	5.93371	6.67084	6.18629	5.88774	6.09685	6.40906	5.42627	6.84212	5.78321	5.79158	5.64493	5.58204	6.16148	6.10373	5.52823	5.99344	5.71802	6.20321	6.22418	6.94903	5.53373	5.65986	5.81763	5.66081	5.84203	5.37694	6.84251	7.01029
APOC2	4.39253	4.15359	3.96995	3.99176	3.74774	4.13115	4.19588	4.03064	4.23603	3.97645	4.00393	3.96468	4.01965	3.90905	3.87654	3.96654	3.94396	4.15455	4.11946	4.24256	4.05544	4.08321	4.10371	3.95716	3.93649	4.6696	4.36852	3.72261	3.67642	4.23767	4.34224	4.51707	4.116	4.18215	3.98568	3.6058	3.91262	3.92026	4.29413	3.97735	3.7929	4.05243	4.44658	4.14732	3.73815	4.03896	3.99474	4.10355	4.15857
APOC3	3.65374	3.59525	3.98436	4.01787	4.35701	4.35701	3.8717	3.93504	3.81745	4.14293	4.06013	4.14196	4.09646	3.8961	3.86483	3.87056	3.99968	3.95813	4.03102	4.07285	4.05056	3.79776	3.82086	4.07269	3.80755	4.56799	3.87513	3.94056	4.31013	4.81471	4.40346	4.33048	3.79006	4.0988	3.7497	4.09804	3.58261	3.94338	3.82213	3.71465	3.81862	3.9535	4.04284	4.19175	3.57014	3.9599	3.77413	3.96995	3.70212
APOD	7.33964	9.93761	7.56187	9.57037	7.20898	8.6423	7.97914	8.46784	8.28925	7.66304	9.26476	8.61373	7.75183	8.75154	9.21305	8.15488	8.53766	8.10577	8.47117	8.75154	8.87044	8.37522	8.78159	8.34263	8.75154	9.85038	8.75851	7.93367	8.24754	8.63964	7.64529	5.83836	6.3409	8.6508	7.92727	9.79011	8.45788	8.36597	7.36689	9.9095	7.90571	9.06686	7.2449	8.68569	7.98838	8.90475	7.82132	8.89494	7.72161
APOE	6.97957	7.05504	6.44532	7.97026	7.10193	8.36055	6.78784	7.04334	7.27585	7.4064	8.18848	7.4742	7.51603	7.50397	7.47896	7.04425	7.73809	7.31353	7.41602	7.36689	7.4155	7.58207	8.07994	7.02995	7.39404	7.23813	7.8472	6.22901	7.47301	6.46271	7.28781	5.68145	6.87073	5.99521	7.50457	7.16181	8.07498	6.66782	7.74621	7.64261	7.38362	7.76817	7.16691	7.55935	8.22847	8.00782	7.50993	7.59248	6.81927
APOF	3.34564	3.02459	3.27149	2.80153	2.95371	2.78241	3.08733	4.01848	2.92873	2.59472	2.9773	2.94945	3.0655	3.07501	3.01212	3.0974	3.00108	2.94588	2.95978	2.90972	2.93639	2.83623	2.61162	2.90595	3.05112	3.95973	2.5332	2.92292	3.11939	3.11739	3.28995	3.51846	3.16281	2.94472	2.70959	2.64949	2.84727	2.72183	3.15647	2.85509	2.78687	2.73314	3.36241	3.10074	3.50331	3.23263	3.29996	3.17463	3.33397
APOH	3.87904	4.08508	4.44172	4.11401	3.73186	4.191	3.88524	3.64989	4.03621	4.5564	4.04763	4.15535	4.0765	4.10069	4.09917	4.12324	4.12862	4.00741	3.98696	4.05454	4.05882	3.88309	3.87844	4.2803	3.95049	5.09566	4.57252	3.83933	4.1715	3.77413	3.9535	4.03659	4.23749	4.70122	3.83857	4.20608	4.22631	3.72032	4.44463	3.97101	3.83167	3.87417	3.9755	4.02936	3.59905	3.98418	3.95335	3.74893	4.42934
APOL1	5.93747	6.23499	6.06204	6.35066	5.36998	5.89283	5.95301	5.70393	5.98283	6.17067	5.98138	6.2193	6.089	6.0268	5.86748	6.0636	5.93687	6.1983	6.12226	6.09934	6.07981	6.52764	6.43662	6.11064	5.86113	7.16968	6.06724	6.2999	6.3044	6.4842	6.08964	5.97082	5.76745	6.07802	5.697	5.64266	5.87085	6.09711	6.12565	5.77109	6.28599	5.96704	5.89311	5.9049	5.60291	5.80024	5.67072	5.96563	6.35928
APOL2	6.94947	7.74227	7.55062	6.64073	7.03572	6.89096	7.00821	7.40537	6.96783	7.1028	6.88307	7.36241	6.99243	7.01169	7.09066	7.09486	7.10107	7.07997	7.0723	7.37387	7.08087	7.59185	7.47301	7.08087	7.14379	7.88954	7.32202	6.99729	6.8067	7.60007	7.21752	7.4155	6.82416	6.88824	7.16084	7.02077	6.85664	6.99683	7.13799	6.85489	7.28169	7.20387	7.09536	6.91099	6.46955	7.41602	6.92335	7.35188	7.81836
APOL3	6.49395	6.85371	7.0394	7.03185	6.00297	6.5126	6.64701	6.932	6.6375	6.79134	6.83298	7.11164	6.65453	6.81814	6.81152	6.83751	6.82222	6.96971	6.88175	6.95757	6.77878	7.16636	6.93461	6.83121	6.76267	7.40861	7.49585	6.53107	6.76224	7.26941	6.72672	5.93168	6.23127	7.09761	6.34934	6.83716	6.66632	7.02397	6.48128	7.1579	7.02397	6.49191	5.98437	6.84092	6.12073	6.95086	6.71075	6.8466	7.26941
APOL4	4.29707	4.61653	3.93102	4.32142	4.02663	4.38379	4.116	4.13856	4.0807	4.40523	4.35494	4.37489	4.26735	4.41784	4.34016	4.33276	4.40136	4.34412	4.12954	4.36941	4.24911	4.24025	4.03377	4.18839	4.2476	5.03551	4.28846	4.24537	4.49342	4.82334	4.20756	3.83875	4.17279	3.84342	4.00702	3.77996	4.01599	4.08242	4.04587	4.34169	4.12036	5.1183	4.61317	4.01771	3.66992	4.60987	4.56146	4.27022	4.28494
APOL5	3.78135	3.96448	4.42739	4.61959	3.92233	3.64152	4.07107	4.36273	3.90363	4.19175	3.88834	4.2581	4.01599	3.77333	3.82416	3.86232	3.96275	4.02243	3.88006	4.11248	3.92534	3.96294	3.98361	4.00232	4.08863	4.13025	4.18505	4.00447	4.13061	4.45847	4.90249	4.11548	4.02936	3.84852	3.80204	3.52851	4.12135	4.12343	4.39559	3.67642	4.15958	3.09387	3.95422	3.98194	3.78865	4.05297	4.41075	4.0419	4.12154
APOL6	4.90576	4.92338	4.76732	4.61418	4.82179	5.9251	4.91773	5.1694	4.99692	4.82179	5.506	4.94807	4.56379	5.32134	5.54344	5.01717	5.69287	4.91178	4.93265	4.57494	5.35654	5.1809	5.12936	4.72112	5.1875	4.81791	5.03254	5.2858	5.29807	4.17132	4.3534	3.83023	5.36487	5.22442	5.23951	5.37212	4.93698	4.9399	4.88458	5.64346	4.80739	5.58275	4.12934	5.02045	4.28295	5.93168	5.11819	5.20325	5.30192
APOLD1	6.12106	8.81671	7.24168	7.97613	10.1661	7.4742	8.16802	6.70456	7.02544	8.45682	7.50702	8.03994	8.8765	7.64529	7.92727	7.86855	8.12054	7.92315	8.76259	8.49881	8.25423	8.50769	8.5903	8.36495	8.24282	6.7972	6.26575	6.71037	6.01587	8.75705	7.57836	8.94702	8.69369	7.99621	6.01737	9.32586	10.3514	8.61626	7.58566	7.54937	5.44987	9.43833	9.36678	9.53322	8.44012	8.40675	7.97693	8.62478	6.44697
APOM	5.03902	4.4248	4.89871	5.40648	4.994	5.22531	4.95114	5.07649	5.0088	5.04897	5.16368	5.15507	5.06605	4.96086	4.92858	4.91832	5.0167	4.99667	4.9671	5.14721	5.04224	5.06756	5.05427	5.08397	4.96168	5.4547	4.86566	4.838	4.92419	5.0088	5.15718	4.00101	4.75953	5.26391	5.0502	4.97517	4.67946	4.40997	4.87234	4.58119	4.79991	5.14058	5.57194	5.43461	5.19675	5.46534	5.15069	4.95936	4.87915
APOO	8.7306	8.2019	9.40505	8.04162	7.76817	8.2123	8.25124	7.36189	8.46335	8.28139	8.35151	8.4451	8.58654	8.61012	8.31708	8.53882	8.3986	8.44633	8.61518	8.69117	8.30235	8.71073	8.69369	8.48512	8.6496	7.99143	8.6873	6.39847	8.09182	8.45383	9.36241	8.59387	8.02671	8.02833	7.95162	8.37962	7.35444	7.38249	8.39967	8.15293	8.78022	8.41022	9.00414	8.19209	9.08737	8.47593	8.9074	8.27545	7.99792
APOOL	6.60188	6.23095	7.78642	6.21094	6.74385	6.27838	6.75811	6.27973	6.95134	6.65413	6.49615	6.44595	6.60733	6.57424	6.61911	6.73268	6.63599	6.60026	6.61327	6.47853	6.57135	6.56301	6.31503	6.3755	6.64446	5.19553	6.69263	6.29635	6.40027	6.18746	7.20387	6.88577	6.94416	6.55542	6.05382	6.79929	6.44356	6.07575	6.41048	6.56192	6.6767	6.43839	6.5437	6.24069	7.09671	6.31311	6.78504	6.38399	6.21306
APOPT1	7.52857	8.35758	7.67399	7.49227	7.42744	7.29161	7.71437	7.30414	7.61225	7.67399	7.67399	7.81253	7.67985	7.65384	7.66304	7.65173	7.58012	7.52732	7.69255	7.62721	7.53642	7.56234	7.78066	7.5931	7.65054	8.44832	7.91612	7.2361	7.56234	8.18848	7.50521	7.82132	7.86644	8.53279	7.52148	7.43292	7.2444	7.69455	7.6205	7.14323	7.47658	7.49108	7.61857	7.12511	6.80177	7.57199	7.30955	7.58504	7.74093
APP	8.05512	8.52231	8.39219	8.73205	8.35551	8.54116	8.54618	9.12322	8.4451	8.26847	8.14655	8.39122	8.32194	8.38063	8.29931	8.4148	8.33254	8.52099	8.32396	8.52587	8.30022	8.00782	7.69455	8.49147	8.40792	7.08445	7.71569	8.69791	7.60143	8.08772	8.14751	8.34742	8.45487	8.57941	8.09536	8.2123	8.07659	9.24453	8.97583	8.6065	8.35259	8.22299	8.49403	8.63214	9.92538	8.30447	8.049	8.44216	8.61737
APPBP2	5.97804	5.40267	5.60369	5.54682	6.11064	5.96892	5.84569	6.16148	5.84203	5.81845	5.75366	5.77858	5.64493	5.7868	5.87135	5.78321	5.83006	5.83509	5.73747	5.58076	5.83214	5.78922	5.82406	5.71308	5.77749	5.15236	5.49488	6.47082	6.12629	5.05122	5.20987	5.47949	6.15158	5.73042	5.82277	5.85717	5.93518	6.3375	5.6522	5.9049	5.59167	5.89041	5.32726	5.84518	5.7978	5.96133	5.93839	5.71054	5.3168
APPL1	6.75297	5.86389	7.64653	6.56864	6.40873	6.11123	6.51882	6.84502	6.72346	6.80054	6.57424	6.54336	6.48905	6.74262	6.85125	6.92194	6.75257	6.87288	6.7545	5.93025	6.80177	5.89845	5.48387	6.54739	6.72956	3.46642	5.95613	6.95571	6.44563	5.83705	6.44775	6.05217	6.47437	5.80699	7.01124	6.76668	6.76512	7.11411	6.76791	7.03482	6.7522	6.55848	6.43418	6.97506	7.48505	6.43376	7.23294	6.5812	6.98545
APPL2	4.87857	5.09032	4.70179	5.73123	5.40287	5.06413	5.33825	5.22315	5.44007	5.506	5.41178	5.28972	5.47715	5.62113	5.44604	5.39884	5.44604	5.26132	5.50573	5.15001	5.34728	5.3826	4.84765	5.5092	5.31662	2.99017	5.18611	5.08374	5.00678	5.03005	4.75163	4.52292	4.50025	4.91057	6.1253	5.48703	5.55345	5.85482	5.41423	5.92209	5.30863	5.37378	5.40267	5.52121	5.42445	5.21521	5.31114	5.14207	5.04939
APRT	6.70341	6.98684	6.68028	7.07956	6.4613	7.66497	6.66487	6.74939	6.82708	7.00059	7.10107	7.17067	7.0723	7.06885	7.02077	6.94245	7.09761	7.09066	6.96971	7.28274	7.05735	7.1788	7.48133	6.88708	6.97396	8.10058	7.01029	7.3164	7.25023	7.44838	7.00694	6.90289	6.77384	6.8562	6.77135	6.8127	6.72992	6.77837	6.80177	7.0732	7.00821	6.94245	6.82416	6.78424	6.48352	6.98936	6.32099	6.69739	6.64114
APTR	4.93518	3.61612	4.64011	4.8042	4.75895	4.61803	4.3786	4.30476	4.58892	4.44228	4.55621	4.2316	4.54966	4.46063	4.38322	4.20176	4.40641	4.31605	4.51513	4.25833	4.43187	4.63194	4.9507	4.64818	4.48294	4.61673	4.77707	4.52789	5.23542	4.08123	4.06775	3.98993	4.42233	4.28331	4.77922	4.51986	4.43209	4.21289	4.01541	4.62637	4.48495	4.72602	4.86123	4.29918	4.71287	4.49492	5.13747	4.06415	3.5272
APTX	4.95843	5.21421	4.91954	5.71929	5.33987	5.99402	5.28292	5.432	5.32043	5.29137	5.4578	5.3831	5.4603	5.47427	5.47497	5.47322	5.45339	5.45033	5.48628	5.51344	5.29386	5.39669	5.45892	5.3387	5.37671	5.65493	5.29425	5.13037	5.23645	5.5119	5.45081	5.63995	5.19438	5.5119	5.35367	5.53472	5.23436	4.88946	5.06016	5.19847	5.27904	5.21421	5.56629	5.46823	6.24069	5.31998	5.6693	5.43693	5.03528
[truncated: 20,649 more rows]
[truncated: 61 more columns]
