# Supplementary material for: Identification of m6A regulator-mediated RNA methylation modification patterns and key immune-related genes involved in atrial fibrillation
Source: Aging (Albany NY). 2023 Feb 20;15(5):1371–93. doi: 10.18632/aging.204537 (PMC10042702; doi:10.18632/aging.204537)
Supplement: Supplementary Table 3 [file aging-15-204537-s004.xlsx]

## Sheet: Sheet1
Supplementary Table 3. The immune microenvironment characteristics in control and AF samples.
ID	GSM789270	GSM789273	GSM789271	GSM789272	GSM789274	GSM789275	GSM1005418	GSM1005420	GSM1005422	GSM1005424	GSM1005426	GSM1005428	GSM1005430	GSM1005432	GSM1005434	GSM1005436	GSM1005438	GSM1005440	GSM1005442	GSM1005444	GSM1006245	GSM1006247	GSM1006249	GSM1006251	GSM1006253	GSM2102198	GSM2102199	GSM2102200	GSM2102201	GSM2102202	GSM2102203	GSM2102204	GSM2102205	GSM2102206	GSM2102207	GSM2102208	GSM2102209	GSM2102184	GSM2102185	GSM2102186	GSM2102187	GSM2102188	GSM2102189	GSM2102190	GSM2102191	GSM2102192	GSM2102193	GSM2102194	GSM2102195
Activated.B.cell	0.262728	0.39287	0.279175	0.239569	0.235762	0.212924	0.229145	0.225705	0.224728	0.228247	0.535298	0.320879	0.242593	0.337155	0.2379	0.237102	0.266835	0.290367	0.251639	0.282764	0.381305	0.268134	0.353937	0.240962	0.289389	0.307432	0.245696	0.179469	0.213249	0.285209	0.220263	0.194489	0.314791	0.304906	0.32845	0.242646	0.343179	0.219601	0.219934	0.506095	0.332689	0.525631	0.167022	0.215944	0.138424	0.201234	0.247766	0.512876	0.407647
Activated.CD4.T.cell	0.222037	0.152878	0.1727	0.279569	0.359624	0.258167	0.195001	0.139648	0.15589	0.337982	0.38795	0.226176	0.339438	0.303516	0.262916	0.202942	0.281399	0.260969	0.30413	0.218566	0.364295	0.25812	0.256851	0.271266	0.272472	0.0551292	0.13267	0.294258	0.311881	0.215304	0.113425	0.170337	0.423057	0.105986	0.292509	0.324491	0.511782	0.302993	0.209746	0.358946	0.280249	0.498974	0.334267	0.290938	0.327933	0.258465	0.197112	0.312929	0.14991
Activated.CD8.T.cell	0.679563	0.569858	0.603989	0.590935	0.556741	0.731926	0.599114	0.506781	0.592736	0.677675	0.771983	0.647978	0.640471	0.667784	0.68114	0.611706	0.663975	0.641561	0.689548	0.6296	0.738123	0.681964	0.719472	0.623551	0.64255	0.653785	0.589139	0.60792	0.693321	0.692138	0.559591	0.415328	0.505106	0.657996	0.652536	0.602247	0.602997	0.735713	0.536725	0.71172	0.654624	0.857635	0.586694	0.676217	0.582204	0.671072	0.526411	0.775118	0.602083
Activated.dendritic.cell	0.655137	0.725364	0.6514	0.722817	0.672096	0.664494	0.650483	0.608957	0.65705	0.683225	0.730543	0.711553	0.721147	0.714875	0.709114	0.700945	0.698383	0.701813	0.729866	0.715539	0.71555	0.724299	0.727641	0.693464	0.673053	0.592085	0.64414	0.709091	0.723287	0.677932	0.646178	0.720793	0.706081	0.622868	0.666661	0.729159	0.726531	0.73871	0.746554	0.725015	0.700962	0.719426	0.714869	0.627839	0.579357	0.697344	0.620634	0.737162	0.680422
CD56bright.natural.killer.cell	0.793272	0.862119	0.810411	0.827368	0.780519	0.821748	0.823676	0.812376	0.822767	0.82895	0.833361	0.821089	0.827755	0.825497	0.825695	0.809144	0.825807	0.820433	0.825487	0.795268	0.835066	0.826733	0.844649	0.828465	0.824341	0.817549	0.837664	0.865076	0.866812	0.835457	0.786964	0.796945	0.799278	0.802821	0.823017	0.828712	0.822628	0.857943	0.799557	0.831715	0.798162	0.855954	0.767662	0.826635	0.743859	0.836833	0.788173	0.819999	0.789223
CD56dim.natural.killer.cell	0.743645	0.748954	0.748678	0.765003	0.742874	0.750752	0.771327	0.753276	0.762812	0.747677	0.769532	0.766124	0.758635	0.743395	0.740967	0.748235	0.750154	0.758315	0.746999	0.780644	0.751136	0.780265	0.783812	0.764785	0.752265	0.78263	0.769924	0.711536	0.713584	0.805024	0.818886	0.743054	0.720896	0.782292	0.716725	0.739338	0.792733	0.713068	0.759742	0.765861	0.754752	0.738946	0.744501	0.755009	0.755593	0.761265	0.750292	0.758934	0.801353
Eosinophil	0.323856	0.387127	0.389093	0.471213	0.466194	0.318948	0.419651	0.450335	0.39411	0.441899	0.421447	0.416412	0.510316	0.434736	0.4225	0.402477	0.401192	0.388827	0.49495	0.300843	0.462461	0.381374	0.359389	0.456958	0.377624	0.215622	0.319753	0.278623	0.337844	0.359326	0.209542	0.390227	0.472716	0.298136	0.444906	0.504545	0.500448	0.469909	0.475853	0.500534	0.408421	0.573166	0.516642	0.435872	0.456247	0.437008	0.463918	0.449366	0.280917
Gamma.delta.T.cell	0.884564	0.828808	0.850889	0.830416	0.802521	0.788706	0.817952	0.77997	0.833767	0.854878	0.840121	0.858722	0.85431	0.852346	0.846334	0.858462	0.838555	0.845397	0.881451	0.82763	0.853485	0.832344	0.831304	0.840353	0.818302	0.834577	0.827585	0.90273	0.893512	0.8086	0.753416	0.766923	0.762422	0.793494	0.794588	0.842587	0.794212	0.898621	0.838825	0.862074	0.825209	0.896795	0.804608	0.839356	0.788489	0.85815	0.817971	0.878888	0.848206
Immature..B.cell	0.380834	0.335596	0.270017	0.297915	0.354168	0.310485	0.272251	0.280798	0.277787	0.2996	0.401362	0.369846	0.32473	0.377264	0.313082	0.348337	0.305017	0.334219	0.351218	0.343334	0.336133	0.400044	0.317484	0.305326	0.302939	0.258772	0.236086	0.349031	0.348585	0.307575	0.249902	0.23739	0.27887	0.292116	0.365419	0.225411	0.262851	0.352735	0.286386	0.452188	0.412605	0.459712	0.362368	0.354035	0.337106	0.420221	0.370741	0.44727	0.416644
Immature.dendritic.cell	0.828664	0.833324	0.863319	0.901731	0.842866	0.880314	0.860513	0.851612	0.867173	0.88864	0.869964	0.895808	0.88024	0.874155	0.879211	0.876281	0.87511	0.884768	0.875978	0.871493	0.873535	0.912399	0.87882	0.867909	0.864034	0.855417	0.827194	0.969526	0.900574	0.874742	0.800428	0.837031	0.827563	0.82644	0.889074	0.85794	0.838046	0.901248	0.867676	0.894714	0.862747	0.892515	0.879705	0.883162	0.841379	0.893396	0.815213	0.888291	0.861249
MDSC	0.708616	0.861049	0.657538	0.727224	0.69036	0.708246	0.615831	0.575977	0.622181	0.805658	0.877068	0.821653	0.80909	0.797341	0.802004	0.801536	0.780339	0.776468	0.854893	0.784583	0.815776	0.856617	0.836561	0.791887	0.762074	0.66658	0.693781	0.718506	0.803779	0.777916	0.564935	0.627429	0.706347	0.585995	0.741814	0.73055	0.764435	0.864088	0.839787	0.867373	0.790693	0.914466	0.799286	0.735039	0.530986	0.781787	0.644996	0.921695	0.820454
Macrophage	0.388352	0.461396	0.384752	0.4154	0.364703	0.393209	0.368679	0.367519	0.371165	0.421089	0.43933	0.422309	0.405544	0.433163	0.418901	0.427693	0.398778	0.412647	0.453961	0.401738	0.427985	0.42452	0.412195	0.405335	0.397039	0.414867	0.409518	0.43267	0.503551	0.377917	0.362912	0.331369	0.371949	0.348988	0.454406	0.391138	0.360312	0.528458	0.45405	0.506119	0.458944	0.480344	0.361178	0.396457	0.313748	0.416141	0.360562	0.4892	0.409893
Mast.cell	0.539659	0.553287	0.507464	0.642545	0.553327	0.540671	0.469555	0.436628	0.480214	0.607418	0.593535	0.616736	0.618127	0.628136	0.633817	0.566516	0.569055	0.580005	0.69597	0.596152	0.667316	0.615669	0.588997	0.606098	0.605706	0.484305	0.425803	0.567218	0.620154	0.609811	0.44282	0.439623	0.621389	0.451395	0.639535	0.535375	0.622301	0.667974	0.65916	0.692842	0.598183	0.739995	0.624898	0.626532	0.440409	0.65759	0.47001	0.631149	0.558723
Monocyte	0.852173	0.829928	0.861905	0.877961	0.802197	0.871608	0.831409	0.846462	0.835523	0.849978	0.887152	0.86469	0.86162	0.8693	0.86697	0.872379	0.86789	0.881793	0.873921	0.869647	0.866927	0.868766	0.84164	0.846377	0.839056	0.846477	0.836661	0.82853	0.89341	0.88255	0.849997	0.796599	0.784566	0.82301	0.853295	0.813638	0.833501	0.869756	0.9101	0.898148	0.847706	0.878449	0.812924	0.841097	0.793233	0.853177	0.835618	0.910366	0.931138
Natural.killer.T.cell	0.623921	0.617426	0.584997	0.5968	0.549952	0.614053	0.589351	0.583177	0.580575	0.601766	0.642484	0.629944	0.622452	0.622496	0.608183	0.61495	0.601295	0.631236	0.607574	0.612739	0.625252	0.613672	0.588538	0.603447	0.575026	0.564164	0.598929	0.645747	0.650865	0.595918	0.601265	0.578149	0.637453	0.62706	0.603211	0.622599	0.59807	0.636279	0.647194	0.631946	0.623843	0.601982	0.568857	0.527251	0.507093	0.564404	0.559191	0.631659	0.626651
Natural.killer.cell	0.710736	0.714193	0.745988	0.758674	0.783987	0.730283	0.741307	0.733669	0.728375	0.764281	0.764426	0.772522	0.773274	0.749415	0.747495	0.752628	0.75069	0.765502	0.760841	0.749767	0.774048	0.746788	0.750566	0.734414	0.733726	0.708032	0.711728	0.758818	0.759428	0.716423	0.713699	0.733725	0.748507	0.714093	0.72104	0.76566	0.820733	0.794395	0.811135	0.765702	0.740446	0.782475	0.749734	0.753928	0.683674	0.708662	0.680688	0.785218	0.792821
Neutrophil	0.179635	0.267619	0.168936	0.132731	0.00787056	0.144612	0.0717949	0.110951	0.0711365	0.14592	0.164106	0.166208	0.242834	0.167321	0.288092	0.202149	0.18819	0.155303	0.319171	0.215763	0.241285	0.255888	0.209942	0.186996	0.192978	0.17983	0.0182105	0.0871119	0.0324488	0.180227	0.102421	0.135846	0.115725	0	0.165494	0.237451	0.215232	0.196422	0.165968	0.211356	0.0364396	0.374593	0.285669	0.353396	0.0482226	0.412052	0.154225	0.229434	0.160641
Plasmacytoid.dendritic.cell	0.838734	0.88538	0.796224	0.858029	0.845543	0.866543	0.862377	0.878914	0.863352	0.852127	0.871086	0.873407	0.857527	0.865796	0.862946	0.866365	0.860525	0.869221	0.880936	0.858707	0.861778	0.864018	0.850183	0.838952	0.858772	0.781891	0.81049	0.852513	0.848661	0.851131	0.835663	0.868605	0.838322	0.824611	0.86602	0.850597	0.828533	0.917078	0.893868	0.869737	0.868362	0.876551	0.853556	0.842434	0.836798	0.891663	0.845773	0.895724	0.869076
Regulatory.T.cell	0.631607	0.625241	0.546409	0.605452	0.512741	0.571166	0.535414	0.479013	0.550011	0.628972	0.655612	0.617568	0.599271	0.616838	0.600159	0.608215	0.584052	0.625343	0.630746	0.553742	0.632362	0.636799	0.63218	0.610164	0.586798	0.565127	0.577868	0.592872	0.63805	0.542587	0.525541	0.493558	0.495649	0.521686	0.60162	0.535142	0.577087	0.736181	0.698577	0.675301	0.657594	0.704649	0.571246	0.602021	0.493676	0.577408	0.526044	0.664696	0.610025
T.follicular.helper.cell	0.656049	0.604844	0.682925	0.708975	0.655649	0.716095	0.677916	0.649007	0.684336	0.695139	0.737815	0.722625	0.677927	0.705775	0.685279	0.675585	0.694155	0.697741	0.686949	0.67683	0.710384	0.702544	0.685795	0.656975	0.671512	0.702547	0.676015	0.675375	0.728954	0.710489	0.615055	0.581083	0.626554	0.716105	0.752187	0.689507	0.685942	0.746322	0.725789	0.754762	0.715685	0.706171	0.622338	0.663246	0.598264	0.688198	0.602849	0.729412	0.685054
Type.1.T.helper.cell	0.562016	0.574807	0.569186	0.636958	0.613514	0.60955	0.577508	0.566096	0.585578	0.600294	0.640036	0.615502	0.628386	0.612706	0.60015	0.597865	0.593703	0.617479	0.625735	0.59499	0.614041	0.607904	0.60599	0.598816	0.593893	0.513406	0.583028	0.632822	0.612574	0.573375	0.587636	0.544563	0.619593	0.567576	0.618188	0.597369	0.645189	0.637518	0.627181	0.619717	0.611305	0.674033	0.6283	0.580925	0.568408	0.593173	0.541057	0.628775	0.588679
Type.17.T.helper.cell	0.436817	0.510622	0.510725	0.445252	0.474104	0.449197	0.455097	0.447875	0.455095	0.477531	0.482863	0.465188	0.465907	0.47639	0.47456	0.473709	0.484342	0.49345	0.487292	0.470663	0.478683	0.454041	0.456171	0.47542	0.465375	0.463564	0.437245	0.448056	0.437876	0.499537	0.474965	0.461233	0.445368	0.515413	0.446652	0.465687	0.484175	0.479531	0.486844	0.488532	0.484285	0.469667	0.513614	0.448001	0.393875	0.485175	0.436142	0.508932	0.475058
Type.2.T.helper.cell	0.45585	0.411227	0.421115	0.48465	0.456292	0.489095	0.47025	0.434475	0.458524	0.513294	0.491827	0.450762	0.463653	0.485733	0.479533	0.433728	0.488311	0.465191	0.476193	0.399522	0.490862	0.471891	0.453441	0.468118	0.472864	0.383709	0.369982	0.610283	0.49155	0.45929	0.424789	0.389892	0.476645	0.443351	0.506661	0.471828	0.475563	0.546631	0.469474	0.516811	0.432568	0.53499	0.413519	0.503733	0.481226	0.489606	0.412067	0.446098	0.33509
[truncated: 61 more columns]
