# Supplementary material for: Identification of m6A regulator-mediated RNA methylation modification patterns and key immune-related genes involved in atrial fibrillation
Source: Aging (Albany NY). 2023 Feb 20;15(5):1371–93. doi: 10.18632/aging.204537 (PMC10042702; doi:10.18632/aging.204537)
Supplement: Supplementary Table 4 [file aging-15-204537-s005.xlsx]

## Sheet: Sheet1
Supplementary Table 4. The results of gene set variation analysis enrichment analysis.
ID	GSM789270	GSM789273	GSM789271	GSM789272	GSM789274	GSM789275	GSM1005418	GSM1005420	GSM1005422	GSM1005424	GSM1005426	GSM1005428	GSM1005430	GSM1005432	GSM1005434	GSM1005436	GSM1005438	GSM1005440	GSM1005442	GSM1005444	GSM1006245	GSM1006247	GSM1006249	GSM1006251	GSM1006253	GSM2102198	GSM2102199	GSM2102200	GSM2102201	GSM2102202	GSM2102203	GSM2102204	GSM2102205	GSM2102206	GSM2102207	GSM2102208	GSM2102209	GSM2102184	GSM2102185	GSM2102186	GSM2102187	GSM2102188	GSM2102189	GSM2102190	GSM2102191	GSM2102192	GSM2102193	GSM2102194	GSM2102195
HALLMARK_TNFA_SIGNALING_VIA_NFKB	0.446533	0.423431	0.429936	0.566485	0.558592	0.470992	0.503885	0.476743	0.470338	0.508277	0.512435	0.526652	0.588257	0.504695	0.501839	0.477592	0.499424	0.494522	0.544784	0.497537	0.529931	0.503247	0.47572	0.501761	0.474576	0.341016	0.347499	0.532093	0.498865	0.435421	0.434817	0.564056	0.655896	0.405289	0.482701	0.597033	0.674478	0.554271	0.571696	0.514551	0.443146	0.59596	0.586121	0.506745	0.47169	0.47323	0.419504	0.48783	0.406897
HALLMARK_HYPOXIA	0.573584	0.573149	0.600079	0.64071	0.632158	0.637422	0.618324	0.602321	0.608095	0.627257	0.62679	0.638491	0.644922	0.617982	0.625452	0.615764	0.636303	0.618033	0.633411	0.635347	0.630352	0.63225	0.624328	0.615297	0.609433	0.55567	0.56003	0.632269	0.600872	0.594997	0.601501	0.636688	0.662643	0.568993	0.621978	0.63737	0.672002	0.651513	0.659777	0.603271	0.587567	0.655564	0.645231	0.611782	0.604159	0.604845	0.58129	0.596849	0.580702
HALLMARK_CHOLESTEROL_HOMEOSTASIS	0.531159	0.511042	0.523317	0.602264	0.561954	0.613002	0.566972	0.540572	0.567246	0.578708	0.592281	0.573853	0.573578	0.573543	0.579686	0.542741	0.591894	0.553155	0.564066	0.562905	0.572107	0.588386	0.587335	0.553094	0.563284	0.56684	0.547465	0.559585	0.592551	0.556048	0.531192	0.545364	0.597282	0.540129	0.580355	0.600646	0.583291	0.575127	0.588809	0.570309	0.538795	0.609646	0.523749	0.557797	0.511041	0.582498	0.508734	0.532299	0.511025
HALLMARK_MITOTIC_SPINDLE	0.390826	0.358055	0.395291	0.419923	0.414031	0.399912	0.406662	0.395144	0.401365	0.422669	0.401776	0.399388	0.401172	0.403536	0.406842	0.403601	0.404871	0.406847	0.39735	0.38695	0.405049	0.412757	0.393417	0.396247	0.402854	0.322406	0.376981	0.437488	0.396695	0.404671	0.38929	0.368536	0.423086	0.3838	0.403051	0.400623	0.416931	0.435615	0.406553	0.413819	0.383801	0.390577	0.382519	0.41273	0.428074	0.386378	0.392765	0.391264	0.385726
HALLMARK_WNT_BETA_CATENIN_SIGNALING	0.351235	0.344534	0.390185	0.399663	0.373258	0.374073	0.37747	0.394706	0.367865	0.368725	0.377994	0.385807	0.387176	0.379529	0.390493	0.378059	0.389877	0.394085	0.368058	0.396062	0.385982	0.392622	0.389878	0.362008	0.376714	0.363069	0.34098	0.384738	0.379139	0.364391	0.329404	0.377904	0.384094	0.3562	0.346262	0.358857	0.387579	0.428827	0.398416	0.411203	0.335136	0.38669	0.336443	0.37394	0.348132	0.365554	0.383135	0.401414	0.403331
HALLMARK_TGF_BETA_SIGNALING	0.640099	0.569758	0.635556	0.688637	0.690441	0.636154	0.653823	0.664215	0.644512	0.66221	0.643636	0.666913	0.676894	0.658345	0.673362	0.662954	0.665806	0.675805	0.671518	0.655268	0.670602	0.651929	0.622908	0.647965	0.654925	0.495583	0.585255	0.72616	0.655509	0.592209	0.636389	0.665015	0.736276	0.599517	0.67663	0.693786	0.699975	0.69845	0.716946	0.65067	0.63304	0.637904	0.665297	0.634065	0.63792	0.615665	0.604661	0.626547	0.624072
HALLMARK_IL6_JAK_STAT3_SIGNALING	0.261208	0.369627	0.276688	0.318529	0.322201	0.31966	0.299023	0.291561	0.287083	0.326164	0.361836	0.355726	0.375382	0.346301	0.32566	0.323649	0.32882	0.331684	0.358617	0.334521	0.361791	0.348478	0.326155	0.315415	0.299005	0.23781	0.237692	0.363743	0.329933	0.317263	0.304756	0.345799	0.389063	0.265774	0.315424	0.369679	0.40492	0.392717	0.408909	0.363089	0.307645	0.401853	0.359093	0.288806	0.209238	0.319049	0.219847	0.349145	0.32808
HALLMARK_DNA_REPAIR	0.659412	0.605684	0.660261	0.685759	0.635571	0.66256	0.651297	0.642873	0.650211	0.668191	0.667318	0.665054	0.665999	0.666908	0.663184	0.656418	0.664444	0.667157	0.659926	0.665981	0.661756	0.676262	0.676152	0.664813	0.661342	0.634249	0.648469	0.646694	0.679551	0.655145	0.638174	0.645615	0.637221	0.615412	0.661749	0.659467	0.658211	0.641776	0.641657	0.667658	0.653007	0.660727	0.651996	0.661543	0.654748	0.665722	0.668285	0.634847	0.614419
HALLMARK_G2M_CHECKPOINT	0.347518	0.268555	0.309784	0.345467	0.349504	0.325724	0.322973	0.316136	0.321551	0.373688	0.329833	0.316577	0.336599	0.33446	0.326584	0.322042	0.321523	0.333	0.330103	0.313001	0.327196	0.329333	0.310513	0.323525	0.327136	0.228328	0.274473	0.382306	0.342799	0.326817	0.31917	0.327157	0.356452	0.255977	0.321527	0.329533	0.32592	0.345511	0.338039	0.329217	0.346913	0.335078	0.340529	0.336441	0.420072	0.314958	0.347077	0.294824	0.257262
HALLMARK_APOPTOSIS	0.540224	0.510086	0.529302	0.617274	0.574734	0.582189	0.561175	0.5554	0.55328	0.581528	0.579221	0.58271	0.593065	0.577696	0.567972	0.56346	0.569514	0.575406	0.58173	0.559716	0.586593	0.566409	0.563021	0.568193	0.564208	0.495213	0.528953	0.59303	0.570927	0.542578	0.513648	0.568453	0.601084	0.518007	0.566106	0.601367	0.632897	0.610086	0.588085	0.587728	0.55289	0.614266	0.580786	0.571755	0.536838	0.555198	0.516887	0.566421	0.543717
HALLMARK_NOTCH_SIGNALING	0.50831	0.398123	0.523917	0.558722	0.530242	0.557645	0.531264	0.562022	0.528336	0.504526	0.522019	0.540445	0.507331	0.519506	0.530261	0.523677	0.527977	0.540032	0.515324	0.540541	0.533245	0.526034	0.513482	0.515346	0.527274	0.396015	0.457334	0.549778	0.515227	0.482328	0.495392	0.477155	0.506491	0.461773	0.492955	0.512287	0.541617	0.538128	0.514882	0.503841	0.499365	0.531758	0.506758	0.557436	0.554219	0.522421	0.512347	0.528215	0.556547
HALLMARK_ADIPOGENESIS	0.721921	0.7351	0.76029	0.777061	0.749835	0.855433	0.770385	0.757694	0.776104	0.773815	0.816726	0.767094	0.763475	0.786922	0.803021	0.757498	0.811752	0.7568	0.786038	0.768771	0.802186	0.782566	0.803392	0.757924	0.789043	0.743592	0.757516	0.743426	0.769417	0.736428	0.741958	0.737025	0.795453	0.762658	0.783646	0.827295	0.776833	0.752418	0.765564	0.811539	0.732032	0.804472	0.726451	0.781024	0.720503	0.822894	0.742289	0.775674	0.722274
HALLMARK_ESTROGEN_RESPONSE_EARLY	0.374996	0.387085	0.371989	0.428286	0.412791	0.414761	0.412781	0.393744	0.40815	0.404266	0.395215	0.424429	0.415046	0.395654	0.406929	0.404476	0.413787	0.408785	0.397654	0.417137	0.410213	0.435483	0.421917	0.398526	0.388595	0.414593	0.356493	0.483142	0.407521	0.422204	0.388483	0.432765	0.440024	0.416063	0.382399	0.421937	0.416851	0.443846	0.409413	0.389564	0.353369	0.429135	0.385938	0.39216	0.360492	0.401532	0.351366	0.385244	0.369617
HALLMARK_ESTROGEN_RESPONSE_LATE	0.352617	0.376182	0.361496	0.414927	0.396275	0.418296	0.398355	0.374538	0.394481	0.398024	0.392917	0.413656	0.40645	0.379715	0.390413	0.389468	0.39127	0.394997	0.389859	0.396448	0.398005	0.41898	0.411662	0.385598	0.379534	0.415546	0.356116	0.452418	0.406978	0.42754	0.358556	0.397795	0.391834	0.392467	0.377786	0.399474	0.384856	0.431442	0.407349	0.381736	0.378627	0.410678	0.366419	0.375409	0.338733	0.386498	0.336607	0.403093	0.369981
HALLMARK_ANDROGEN_RESPONSE	0.522256	0.484077	0.520658	0.564967	0.554474	0.530727	0.535961	0.519724	0.543537	0.552586	0.541107	0.528162	0.54148	0.550744	0.550783	0.540427	0.550447	0.538392	0.545914	0.514209	0.549063	0.540441	0.538534	0.535155	0.543311	0.424361	0.464581	0.588405	0.527564	0.497041	0.497751	0.554036	0.587248	0.47571	0.524034	0.593424	0.560704	0.597422	0.556721	0.563246	0.522144	0.575206	0.524318	0.523411	0.510396	0.534054	0.485388	0.526925	0.476384
HALLMARK_MYOGENESIS	0.684021	0.701058	0.699354	0.743999	0.727623	0.742238	0.72513	0.721465	0.728286	0.715463	0.727684	0.740226	0.730272	0.720426	0.730037	0.721164	0.73367	0.725247	0.718405	0.746331	0.726091	0.734147	0.727534	0.718544	0.727635	0.727493	0.72485	0.687447	0.670921	0.726952	0.74303	0.707148	0.703506	0.732367	0.716891	0.732249	0.736889	0.725881	0.732422	0.711098	0.697306	0.717541	0.717561	0.723755	0.697782	0.718811	0.689774	0.733596	0.745877
HALLMARK_PROTEIN_SECRETION	0.719308	0.647522	0.681222	0.747305	0.739791	0.727148	0.720054	0.713639	0.729583	0.73845	0.723143	0.719717	0.71637	0.744125	0.73276	0.737334	0.735184	0.738697	0.740167	0.695359	0.737071	0.714222	0.695623	0.729512	0.735426	0.500605	0.643044	0.778877	0.729599	0.632085	0.684677	0.695418	0.73032	0.611336	0.745345	0.734513	0.732134	0.772966	0.750181	0.733741	0.741984	0.730449	0.709622	0.712363	0.749042	0.701107	0.708419	0.71831	0.69085
HALLMARK_INTERFERON_ALPHA_RESPONSE	0.564433	0.557486	0.636961	0.579463	0.46284	0.554452	0.556062	0.51544	0.596526	0.585703	0.592941	0.6018	0.560368	0.616641	0.555001	0.569114	0.570725	0.611559	0.574294	0.532773	0.601614	0.666272	0.571703	0.573568	0.564309	0.523261	0.552921	0.613249	0.662494	0.506978	0.452374	0.458973	0.510936	0.500347	0.547121	0.515924	0.577626	0.632867	0.592018	0.647371	0.636012	0.600971	0.535999	0.555048	0.490951	0.725379	0.673945	0.567967	0.570103
HALLMARK_INTERFERON_GAMMA_RESPONSE	0.524148	0.524456	0.549931	0.562258	0.478926	0.53724	0.522516	0.487615	0.53628	0.560954	0.577702	0.569463	0.561358	0.583451	0.534277	0.53719	0.541816	0.563605	0.562977	0.507819	0.58106	0.605025	0.540844	0.547163	0.531105	0.461339	0.487112	0.565483	0.602721	0.50262	0.447824	0.474336	0.530806	0.470033	0.522716	0.52734	0.581598	0.60825	0.5635	0.613433	0.58673	0.613473	0.530962	0.535899	0.471803	0.629693	0.562307	0.56675	0.516279
HALLMARK_APICAL_JUNCTION	0.415817	0.427954	0.43206	0.457771	0.431459	0.46346	0.430037	0.416886	0.4356	0.439283	0.447694	0.470311	0.452491	0.43941	0.452876	0.4523	0.457145	0.454174	0.446524	0.467971	0.444934	0.466192	0.448573	0.429798	0.442032	0.431656	0.421706	0.456604	0.405341	0.463721	0.457763	0.427509	0.424234	0.445973	0.450152	0.459335	0.458704	0.482175	0.474625	0.425921	0.400382	0.438957	0.424062	0.453093	0.394593	0.440754	0.387635	0.459501	0.47208
HALLMARK_APICAL_SURFACE	0.325455	0.331546	0.383605	0.327078	0.340923	0.312064	0.333273	0.344463	0.332373	0.339599	0.346606	0.384338	0.346831	0.335576	0.344957	0.344581	0.353734	0.346965	0.343364	0.366715	0.348307	0.374541	0.350541	0.337267	0.338139	0.337555	0.316327	0.374783	0.310283	0.387154	0.296744	0.325273	0.306132	0.347413	0.321479	0.360586	0.374067	0.350962	0.34819	0.34242	0.304132	0.350073	0.349435	0.363043	0.305084	0.367845	0.304395	0.366881	0.381787
HALLMARK_HEDGEHOG_SIGNALING	0.217687	0.222007	0.294371	0.284404	0.248982	0.259277	0.23802	0.239089	0.245243	0.250282	0.250914	0.272134	0.270584	0.24742	0.271512	0.254795	0.263028	0.27254	0.252857	0.287268	0.265916	0.279386	0.250419	0.234856	0.25466	0.206658	0.24699	0.279581	0.225999	0.285263	0.281069	0.221047	0.196856	0.270041	0.249398	0.276857	0.287183	0.30628	0.310676	0.264672	0.188983	0.249649	0.225895	0.289258	0.24555	0.239705	0.212899	0.264259	0.299259
HALLMARK_COMPLEMENT	0.445673	0.461636	0.453226	0.456024	0.450871	0.45761	0.444167	0.433438	0.443737	0.473945	0.494739	0.47994	0.494491	0.481895	0.474473	0.468153	0.470709	0.474283	0.492123	0.456209	0.487877	0.479841	0.462166	0.4635	0.456528	0.380689	0.406444	0.478908	0.494939	0.455472	0.413418	0.448002	0.461888	0.405626	0.457483	0.467612	0.475606	0.522545	0.497899	0.499725	0.475968	0.522848	0.461785	0.459415	0.406721	0.477972	0.426956	0.497604	0.446215
HALLMARK_UNFOLDED_PROTEIN_RESPONSE	0.697264	0.633368	0.660035	0.734523	0.70064	0.72036	0.696759	0.679014	0.697401	0.708166	0.706904	0.707087	0.711179	0.708189	0.70657	0.704331	0.709671	0.711452	0.705551	0.700216	0.712966	0.704422	0.69674	0.699211	0.699613	0.651596	0.631201	0.731393	0.695431	0.663619	0.686084	0.713756	0.730039	0.640958	0.687078	0.700988	0.694928	0.723472	0.700581	0.695045	0.700284	0.725829	0.703013	0.687771	0.692829	0.696345	0.678763	0.674775	0.636233
HALLMARK_PI3K_AKT_MTOR_SIGNALING	0.528782	0.533832	0.513429	0.555588	0.547628	0.559032	0.531153	0.520222	0.539349	0.554489	0.566233	0.552876	0.549028	0.558758	0.557437	0.553803	0.561456	0.558091	0.558981	0.552324	0.564621	0.552678	0.537506	0.544238	0.551724	0.436489	0.491312	0.547789	0.529797	0.520959	0.524645	0.521236	0.547835	0.504788	0.54806	0.572516	0.56395	0.577292	0.575788	0.569709	0.529231	0.580387	0.540112	0.533693	0.520521	0.550986	0.514086	0.564826	0.548625
HALLMARK_MTORC1_SIGNALING	0.632499	0.591633	0.617915	0.687841	0.638716	0.678651	0.632429	0.624012	0.642053	0.673868	0.676892	0.65706	0.667883	0.667102	0.665711	0.649459	0.66722	0.658688	0.662213	0.649772	0.661425	0.658603	0.65517	0.643613	0.652602	0.547595	0.58826	0.665984	0.657055	0.615617	0.627193	0.652116	0.700384	0.573289	0.641055	0.667062	0.663219	0.667338	0.671381	0.670882	0.64406	0.686465	0.653339	0.644839	0.631355	0.650167	0.619345	0.631918	0.585496
HALLMARK_E2F_TARGETS	0.427793	0.355577	0.425363	0.432111	0.419242	0.406508	0.406949	0.391975	0.406647	0.46358	0.422062	0.402787	0.427314	0.428309	0.414228	0.407705	0.410409	0.418964	0.41499	0.401594	0.407799	0.413589	0.407002	0.414034	0.41755	0.328079	0.375133	0.461916	0.447721	0.443325	0.398655	0.408764	0.408373	0.346093	0.408135	0.398859	0.40258	0.415765	0.400681	0.438548	0.424295	0.415061	0.419956	0.422965	0.496131	0.403601	0.441089	0.381145	0.327757
HALLMARK_MYC_TARGETS_V1	0.860921	0.824691	0.85861	0.87592	0.857351	0.859199	0.864194	0.846319	0.863321	0.877234	0.868156	0.863009	0.869253	0.874798	0.868562	0.863534	0.869452	0.867152	0.865715	0.861781	0.866599	0.86833	0.864878	0.869311	0.868927	0.795879	0.826777	0.878841	0.87773	0.844817	0.844149	0.872299	0.874734	0.807608	0.866024	0.873019	0.862968	0.861533	0.853455	0.872412	0.874948	0.860969	0.865566	0.863912	0.877802	0.856163	0.870097	0.838806	0.80715
HALLMARK_MYC_TARGETS_V2	0.501796	0.489987	0.541268	0.570782	0.474929	0.561713	0.530987	0.515222	0.522964	0.533126	0.536797	0.533515	0.547641	0.522336	0.529514	0.518062	0.536419	0.535845	0.528518	0.549451	0.531092	0.556674	0.573741	0.521594	0.526387	0.554408	0.498256	0.535471	0.546013	0.53986	0.547745	0.572631	0.590217	0.480619	0.51089	0.558407	0.496445	0.5019	0.534672	0.512599	0.527383	0.51872	0.525645	0.518988	0.484985	0.522945	0.517371	0.480077	0.445265
HALLMARK_EPITHELIAL_MESENCHYMAL_TRANSITION	0.582722	0.5017	0.562956	0.6804	0.654618	0.597645	0.604164	0.568416	0.589002	0.64032	0.616941	0.642125	0.655556	0.608783	0.633306	0.616205	0.614398	0.627126	0.634895	0.612825	0.622141	0.613954	0.596667	0.602155	0.608424	0.527192	0.533649	0.690485	0.576779	0.594832	0.590372	0.637048	0.642001	0.553942	0.622301	0.609986	0.63362	0.704656	0.663248	0.589127	0.580786	0.642928	0.629585	0.620271	0.607496	0.580883	0.508413	0.62701	0.589111
HALLMARK_INFLAMMATORY_RESPONSE	0.245664	0.208435	0.220693	0.285326	0.25363	0.2305	0.236852	0.213325	0.224674	0.273536	0.282372	0.274156	0.308913	0.272087	0.248985	0.246762	0.245792	0.272157	0.288119	0.232062	0.283611	0.27517	0.240288	0.250996	0.231787	0.183732	0.183289	0.311053	0.288344	0.226385	0.179685	0.261242	0.31729	0.214507	0.238171	0.293619	0.351515	0.325491	0.284559	0.302992	0.255361	0.329191	0.267034	0.25055	0.176408	0.268466	0.195945	0.290698	0.226612
HALLMARK_XENOBIOTIC_METABOLISM	0.370643	0.387533	0.396491	0.441056	0.395452	0.473995	0.405619	0.389152	0.406266	0.422989	0.441778	0.43308	0.426266	0.426188	0.428334	0.412473	0.43932	0.419815	0.430304	0.423255	0.431473	0.436296	0.446339	0.408783	0.424259	0.408619	0.407101	0.420298	0.437197	0.396296	0.40698	0.385257	0.436706	0.407325	0.431053	0.444207	0.426299	0.417817	0.438697	0.431262	0.398379	0.447376	0.386054	0.410483	0.361254	0.432106	0.374343	0.407965	0.383691
HALLMARK_FATTY_ACID_METABOLISM	0.646945	0.637691	0.701679	0.693298	0.653932	0.742453	0.681201	0.659046	0.680594	0.689517	0.714073	0.677456	0.671515	0.702102	0.700406	0.676445	0.714575	0.683269	0.6907	0.674131	0.70095	0.70083	0.71335	0.677224	0.69661	0.654186	0.676741	0.656536	0.698852	0.646251	0.647459	0.655193	0.689619	0.686068	0.696843	0.710758	0.680189	0.670454	0.680769	0.717002	0.67249	0.712069	0.641878	0.68851	0.663276	0.719153	0.671773	0.689615	0.648562
HALLMARK_OXIDATIVE_PHOSPHORYLATION	0.954111	0.953247	1	0.949708	0.94501	0.97289	0.969821	0.946752	0.970035	0.96865	0.96937	0.965064	0.967717	0.974845	0.969681	0.970047	0.97265	0.967833	0.97076	0.969281	0.969968	0.966379	0.971235	0.972816	0.973772	0.908649	0.959896	0.888036	0.951574	0.950616	0.969035	0.972253	0.954282	0.959836	0.955974	0.978293	0.936189	0.920725	0.961188	0.969468	0.976047	0.970576	0.980337	0.967427	0.971004	0.970022	0.977877	0.972309	0.940154
HALLMARK_GLYCOLYSIS	0.483593	0.454873	0.496352	0.523347	0.497018	0.523214	0.493056	0.490077	0.495944	0.519831	0.515156	0.511877	0.512838	0.503594	0.511408	0.502193	0.51427	0.512073	0.507328	0.50797	0.502094	0.515543	0.517442	0.497776	0.496948	0.480959	0.481216	0.534525	0.506754	0.49407	0.503126	0.496526	0.513469	0.4529	0.493115	0.495549	0.496254	0.522774	0.515815	0.488845	0.481034	0.522285	0.502299	0.492631	0.496101	0.494692	0.479316	0.482239	0.462274
HALLMARK_REACTIVE_OXYGEN_SPECIES_PATHWAY	0.691695	0.688562	0.712582	0.736156	0.68359	0.739155	0.707362	0.697758	0.713173	0.715754	0.734405	0.724776	0.712093	0.717856	0.717983	0.7044	0.71939	0.708012	0.717763	0.70518	0.716415	0.724154	0.735349	0.710885	0.718554	0.679814	0.703517	0.713974	0.734913	0.71126	0.690989	0.706856	0.702928	0.682936	0.712529	0.730557	0.69059	0.715081	0.735856	0.718734	0.704565	0.72097	0.683894	0.699428	0.667917	0.705124	0.677289	0.719646	0.707125
HALLMARK_P53_PATHWAY	0.550421	0.527056	0.556739	0.598292	0.55341	0.558938	0.562278	0.546356	0.560346	0.561674	0.575721	0.581495	0.582037	0.5686	0.571309	0.563578	0.568652	0.571405	0.569781	0.573247	0.574489	0.5768	0.573452	0.562974	0.562985	0.553423	0.528546	0.589957	0.563969	0.558021	0.512768	0.562078	0.573244	0.534664	0.557976	0.586509	0.58986	0.598949	0.586603	0.584162	0.538258	0.586268	0.555995	0.566467	0.521829	0.556764	0.524407	0.57553	0.53958
HALLMARK_UV_RESPONSE_UP	0.506999	0.487823	0.522496	0.592668	0.538496	0.573115	0.538688	0.522768	0.534146	0.54748	0.560044	0.558336	0.569175	0.54833	0.548638	0.537289	0.553848	0.543845	0.553091	0.545618	0.562631	0.560299	0.549474	0.543698	0.544686	0.487301	0.507734	0.528978	0.528551	0.534954	0.539785	0.538604	0.561647	0.505441	0.535579	0.581649	0.594167	0.553183	0.576726	0.55802	0.527221	0.572529	0.563177	0.537758	0.528384	0.541329	0.512042	0.527634	0.499928
HALLMARK_UV_RESPONSE_DN	0.577684	0.541585	0.577948	0.613442	0.626452	0.579216	0.596658	0.576507	0.591654	0.614011	0.583489	0.592168	0.589835	0.607876	0.612105	0.602823	0.610394	0.603738	0.604178	0.585074	0.603844	0.604355	0.571915	0.58363	0.602401	0.459476	0.519873	0.648265	0.57771	0.536165	0.558217	0.558189	0.621189	0.547171	0.607065	0.606554	0.623782	0.6446	0.584675	0.609984	0.566063	0.60899	0.576384	0.615048	0.618528	0.593883	0.586176	0.574949	0.554638
HALLMARK_ANGIOGENESIS	0.616684	0.564213	0.599078	0.661187	0.599749	0.601477	0.610409	0.592333	0.598844	0.638416	0.630017	0.626302	0.659044	0.648186	0.637692	0.637958	0.624033	0.647891	0.634414	0.642626	0.630929	0.61242	0.597096	0.602043	0.61123	0.526631	0.560809	0.649399	0.573452	0.593934	0.621448	0.647044	0.647389	0.567075	0.596474	0.637099	0.626421	0.672213	0.688285	0.642869	0.610545	0.618981	0.652949	0.601682	0.580741	0.590849	0.557078	0.667856	0.632524
HALLMARK_HEME_METABOLISM	0.493729	0.483402	0.507406	0.499501	0.490233	0.505884	0.501027	0.505492	0.504979	0.501759	0.505407	0.499677	0.501064	0.502331	0.50257	0.506756	0.510531	0.501724	0.501012	0.50368	0.506001	0.508085	0.506624	0.498253	0.502896	0.445077	0.485039	0.509023	0.479689	0.481369	0.475602	0.531295	0.520768	0.47382	0.501535	0.522552	0.517553	0.513565	0.513707	0.505418	0.487762	0.48845	0.493488	0.483436	0.464642	0.493437	0.488373	0.487046	0.484944
HALLMARK_COAGULATION	0.413189	0.418967	0.408126	0.445802	0.422175	0.440225	0.423509	0.401208	0.416817	0.436541	0.44622	0.454138	0.454984	0.426685	0.430968	0.433438	0.435473	0.442574	0.438399	0.451128	0.435944	0.442684	0.443789	0.419278	0.420769	0.444964	0.414834	0.429626	0.420228	0.454575	0.423383	0.45338	0.398455	0.447338	0.441376	0.428515	0.432998	0.446144	0.456683	0.417954	0.418524	0.448866	0.428615	0.429596	0.375706	0.414057	0.361369	0.472548	0.450963
HALLMARK_IL2_STAT5_SIGNALING	0.401373	0.384044	0.397526	0.444589	0.415199	0.426514	0.405166	0.387257	0.397876	0.431103	0.444598	0.437747	0.44581	0.437471	0.427945	0.416646	0.430674	0.433317	0.436355	0.423675	0.442609	0.440502	0.425578	0.415861	0.414871	0.334289	0.355713	0.432511	0.422306	0.405904	0.375533	0.402388	0.45421	0.381795	0.409821	0.435516	0.469602	0.477233	0.459897	0.456327	0.413613	0.470098	0.429212	0.403316	0.37175	0.423886	0.36904	0.437835	0.386239
HALLMARK_BILE_ACID_METABOLISM	0.303807	0.343448	0.365962	0.343647	0.328932	0.38235	0.34599	0.342301	0.352507	0.347081	0.361595	0.350114	0.34805	0.353998	0.358629	0.342519	0.361319	0.33411	0.351277	0.339411	0.355184	0.354207	0.358792	0.347265	0.350408	0.354723	0.352799	0.347247	0.362569	0.326768	0.29223	0.312746	0.343462	0.360865	0.361738	0.374373	0.332211	0.341541	0.3236	0.365664	0.321049	0.365709	0.30582	0.364426	0.3348	0.370629	0.336174	0.354207	0.326685
HALLMARK_PEROXISOME	0.503634	0.475609	0.526572	0.524781	0.500471	0.555478	0.517187	0.497336	0.521037	0.523625	0.528423	0.508587	0.512415	0.520598	0.524373	0.512543	0.526401	0.512507	0.520516	0.505451	0.520486	0.531569	0.538116	0.514294	0.516145	0.509351	0.507368	0.51373	0.518745	0.495692	0.473983	0.496225	0.505544	0.494316	0.508418	0.543242	0.503002	0.498546	0.502045	0.532101	0.50264	0.52606	0.489891	0.523377	0.527184	0.536592	0.498073	0.506688	0.480332
HALLMARK_ALLOGRAFT_REJECTION	0.307534	0.307073	0.291418	0.307317	0.285227	0.302495	0.271536	0.258927	0.268784	0.323854	0.383944	0.342918	0.333761	0.341465	0.313905	0.312713	0.310463	0.327084	0.338195	0.298139	0.353474	0.345571	0.324288	0.308662	0.297704	0.240086	0.259246	0.321972	0.34701	0.302207	0.238824	0.236497	0.288853	0.278143	0.298559	0.30154	0.334088	0.372114	0.316093	0.385744	0.347994	0.431959	0.310571	0.308444	0.240281	0.317273	0.247245	0.395308	0.32927
HALLMARK_SPERMATOGENESIS	0.0966292	0.0487212	0.0965523	0.0777012	0.0828741	0.0670601	0.0668809	0.0784627	0.067704	0.0994791	0.0713571	0.076109	0.0871843	0.0757767	0.0751259	0.0823686	0.0795765	0.076177	0.0771197	0.0749704	0.0719395	0.0736108	0.0581827	0.0705255	0.0819571	0.0881053	0.0479405	0.0737048	0.0770189	0.0925694	0.0685356	0.0824712	0.0641267	0.0580876	0.0622318	0.087923	0.0400953	0.0833984	0.0769451	0.0559308	0.0795251	0.100465	0.106832	0.0984794	0.131345	0.0961398	0.0897095	0.0710507	0.056673
HALLMARK_KRAS_SIGNALING_UP	0.33348	0.266747	0.282224	0.39341	0.364175	0.349373	0.335332	0.297642	0.325166	0.367993	0.371519	0.358947	0.374674	0.366231	0.355358	0.346543	0.352711	0.360347	0.365284	0.320799	0.372558	0.348843	0.335351	0.345968	0.343595	0.241306	0.292426	0.37165	0.360985	0.294108	0.251036	0.304784	0.381648	0.279454	0.358866	0.355764	0.393258	0.397106	0.368721	0.381611	0.346861	0.409042	0.360308	0.33997	0.314561	0.343885	0.285216	0.381342	0.310702
HALLMARK_KRAS_SIGNALING_DN	0.0617766	0.115664	0.0811763	0.0588383	0.0601559	0.0639399	0.0603651	0.0836878	0.0710715	0.047807	0.052537	0.0888531	0.0683835	0.0546865	0.0623121	0.0724139	0.0716506	0.0686225	0.0629866	0.107549	0.0526618	0.0680797	0.0551841	0.0650007	0.057621	0.117741	0.0778229	0.0490855	0.0214231	0.126463	0.09042	0.115227	0.0537069	0.0825153	0.0306208	0.0793823	0.0494355	0.0616499	0.0918564	0.044356	0.0368399	0.0703422	0.0798649	0.0884397	0.0568081	0.0753363	0.0629669	0.0970802	0.124983
HALLMARK_PANCREAS_BETA_CELLS	0.0552683	0.039546	0.0340078	0.0520548	0.0618287	0.0721957	0.0425851	0.0362904	0.0599994	0.0510371	0.0220682	0.0352961	0.0406241	0.0380688	0.0319106	0.049408	0.0535439	0.0441404	0.0394403	0.0622344	0.0482906	0.0515031	0.0381884	0.0375606	0.0399393	0.0575594	0.0709095	0	0.0652005	0.0657833	0.0401211	0.0685642	0.0754403	0.0690109	0.0625969	0.0590832	0.0862593	0.0513547	0.110596	0.010597	0.0225287	0.0571962	0.0376536	0.0479728	0.00014364	0.0732799	0.0466143	0.0639738	0.0956794
[truncated: 61 more columns]
