# Supplementary material for: Identification of m6A regulator-mediated RNA methylation modification patterns and key immune-related genes involved in atrial fibrillation
Source: Aging (Albany NY). 2023 Feb 20;15(5):1371–93. doi: 10.18632/aging.204537 (PMC10042702; doi:10.18632/aging.204537)
Supplement: Supplementary Table 5 [file aging-15-204537-s006.xlsx]

## Sheet: Sheet1
Supplementary Table 5. The genes in the lightgreen and lightcyan modules.
moduleColor	geneSymbol
lightgreen	AMICA1
lightgreen	ARHGAP9
lightcyan	BCAT1
lightcyan	BLNK
lightcyan	C16orf54
lightcyan	C1QA
lightcyan	C1QB
lightcyan	C1QC
lightcyan	C1S
lightcyan	C1orf162
lightcyan	C3AR1
lightcyan	CASP1
lightgreen	CCL19
lightgreen	CCL5
lightcyan	CCR1
lightcyan	CD14
lightcyan	CD163
lightgreen	CD2
lightgreen	CD3D
lightgreen	CD48
lightgreen	CD52
lightgreen	CD8A
lightgreen	CORO1A
lightgreen	COTL1
lightcyan	CSF1R
lightcyan	CTSC
lightcyan	CTSK
lightcyan	CTSS
lightgreen	CX3CR1
lightcyan	CXCL12
lightgreen	EOMES
lightcyan	EVI2A
lightcyan	EVI2B
lightcyan	FCER1G
lightcyan	FTL
lightcyan	GIMAP2
lightcyan	GLIPR1
lightgreen	GMFG
lightgreen	GNLY
lightgreen	GZMA
lightgreen	GZMH
lightgreen	GZMK
lightgreen	HCLS1
lightgreen	HCST
lightcyan	HLA-DMA
lightcyan	HLA-DMB
lightcyan	HLA-DPA1
lightcyan	HLA-DPB1
lightcyan	HLA-DRA
lightgreen	HMHA1
lightcyan	HPGDS
lightgreen	IGKC
lightgreen	IGLC1
lightgreen	IGLL3P
lightgreen	IGLL5
lightgreen	IGLV1-44
lightgreen	IL10RA
lightcyan	IL13RA1
lightcyan	IL1R1
lightgreen	IL7R
lightcyan	IRF8
lightcyan	ITGAM
lightcyan	ITGB2
lightgreen	KLRB1
lightcyan	LAPTM5
lightgreen	LCK
lightcyan	LIPA
lightgreen	LSP1
lightcyan	LST1
lightcyan	LY86
lightcyan	LYN
lightcyan	LYSMD2
lightcyan	LYVE1
lightcyan	LYZ
lightcyan	MAFB
lightcyan	MARCKS
lightcyan	MNDA
lightcyan	MPEG1
lightcyan	MRC1
lightcyan	MS4A4A
lightcyan	MS4A6A
lightcyan	MS4A7
lightcyan	MSR1
lightgreen	MYO1F
lightcyan	NCF2
lightgreen	NKG7
lightcyan	PIK3AP1
lightgreen	PTPN6
lightcyan	PTPRC
lightgreen	PTPRCAP
lightcyan	PYCARD
lightgreen	RAC2
lightgreen	RASAL3
lightcyan	RNASE6
lightcyan	S100A4
lightcyan	SLC7A7
lightcyan	SPP1
lightgreen	TBC1D10C
lightcyan	TNFSF13
lightcyan	TNFSF13B
lightgreen	TRBC1
lightcyan	TYROBP
lightcyan	VAMP8
lightcyan	VSIG4
