# Supplementary material for: Identification of m6A regulator-mediated RNA methylation modification patterns and key immune-related genes involved in atrial fibrillation
Source: Aging (Albany NY). 2023 Feb 20;15(5):1371–93. doi: 10.18632/aging.204537 (PMC10042702; doi:10.18632/aging.204537)
Supplement: Supplementary Table 6 [file aging-15-204537-s007.xlsx]

## Sheet: Sheet1
Supplementary Table 6. Detailed results of the GO enrichment analysis.
ONTOLOGY	ID	Description	GeneRatio	BgRatio	pvalue	p.adjust	qvalue	geneID	Count
BP	GO:0002443	leukocyte mediated immunity	30/94	457/18800	1.12263e-25	1.82988e-22	1.18762e-22	C1QA/C1QB/C1QC/C1S/CD8A/CORO1A/CTSC/CX3CR1/FCER1G/HLA-DMA/HLA-DMB/HLA-DPA1/HLA-DPB1/HLA-DRA/IGKC/IGLC1/IGLL5/IL1R1/IL7R/ITGAM/ITGB2/LYN/NKG7/PTPN6/PTPRC/RAC2/TNFSF13/TRBC1/TYROBP/VAMP8	30
BP	GO:0002696	positive regulation of leukocyte activation	27/94	421/18800	8.58184e-23	6.9942e-20	4.53934e-20	CCL19/CCL5/CD2/CORO1A/CTSC/HLA-DMA/HLA-DMB/HLA-DPA1/HLA-DPB1/HLA-DRA/IGKC/IGLC1/IGLL5/IL7R/ITGAM/ITGB2/LCK/LYN/PTPN6/PTPRC/PYCARD/RASAL3/TNFSF13/TNFSF13B/TRBC1/TYROBP/VAMP8	27
BP	GO:0050867	positive regulation of cell activation	27/94	436/18800	2.15878e-22	1.17294e-19	7.61253e-20	CCL19/CCL5/CD2/CORO1A/CTSC/HLA-DMA/HLA-DMB/HLA-DPA1/HLA-DPB1/HLA-DRA/IGKC/IGLC1/IGLL5/IL7R/ITGAM/ITGB2/LCK/LYN/PTPN6/PTPRC/PYCARD/RASAL3/TNFSF13/TNFSF13B/TRBC1/TYROBP/VAMP8	27
BP	GO:0002449	lymphocyte mediated immunity	23/94	365/18800	2.99514e-19	1.22052e-16	7.92135e-17	C1QA/C1QB/C1QC/C1S/CD8A/CORO1A/CTSC/FCER1G/HLA-DMA/HLA-DMB/HLA-DPA1/HLA-DPB1/HLA-DRA/IGKC/IGLC1/IGLL5/IL1R1/IL7R/NKG7/PTPN6/PTPRC/TNFSF13/TRBC1	23
BP	GO:0002460	adaptive immune response based on somatic recombination of immune receptors built from immunoglobulin superfamily domains	23/94	370/18800	4.06029e-19	1.32365e-16	8.59072e-17	C1QA/C1QB/C1QC/C1S/CCL19/CD8A/CTSC/FCER1G/HLA-DMA/HLA-DMB/HLA-DPA1/HLA-DPB1/HLA-DRA/IGKC/IGLC1/IGLL5/IL1R1/IL7R/PTPN6/PTPRC/TNFSF13/TNFSF13B/TRBC1	23
BP	GO:0051251	positive regulation of lymphocyte activation	22/94	371/18800	7.27303e-18	1.97584e-15	1.28235e-15	CCL19/CCL5/CORO1A/HLA-DMA/HLA-DMB/HLA-DPA1/HLA-DPB1/HLA-DRA/IGKC/IGLC1/IGLL5/IL7R/LCK/LYN/PTPN6/PTPRC/PYCARD/RASAL3/TNFSF13/TNFSF13B/TRBC1/TYROBP	22
BP	GO:0007159	leukocyte cell-cell adhesion	22/94	381/18800	1.27942e-17	2.97921e-15	1.93355e-15	CCL19/CCL5/CORO1A/CX3CR1/CXCL12/HLA-DMA/HLA-DMB/HLA-DPA1/HLA-DPB1/HLA-DRA/IL7R/ITGB2/LAPTM5/LCK/LYN/PTPN6/PTPRC/PYCARD/RAC2/RASAL3/TNFSF13B/VSIG4	22
BP	GO:0002253	activation of immune response	22/94	386/18800	1.68663e-17	3.43651e-15	2.23035e-15	BLNK/C1QA/C1QB/C1QC/C1S/C3AR1/CD8A/FCER1G/HLA-DPB1/IGKC/IGLC1/IGLL5/LAPTM5/LCK/LYN/MNDA/PTPN6/PTPRC/PYCARD/TRBC1/TYROBP/VSIG4	22
BP	GO:0002366	leukocyte activation involved in immune response	19/94	285/18800	1.93099e-16	3.49725e-14	2.26977e-14	CCL19/CORO1A/CX3CR1/EOMES/FCER1G/HLA-DMB/HLA-DRA/IRF8/ITGAM/ITGB2/LYN/NKG7/PTPN6/PTPRC/PYCARD/RAC2/TNFSF13/TYROBP/VAMP8	19
BP	GO:0002263	cell activation involved in immune response	19/94	289/18800	2.49966e-16	4.07445e-14	2.64438e-14	CCL19/CORO1A/CX3CR1/EOMES/FCER1G/HLA-DMB/HLA-DRA/IRF8/ITGAM/ITGB2/LYN/NKG7/PTPN6/PTPRC/PYCARD/RAC2/TNFSF13/TYROBP/VAMP8	19
BP	GO:0050863	regulation of T cell activation	20/94	342/18800	3.60671e-16	5.34448e-14	3.46865e-14	CCL19/CCL5/CD2/CORO1A/HLA-DMA/HLA-DMB/HLA-DPA1/HLA-DPB1/HLA-DRA/IL7R/LAPTM5/LCK/LYN/PTPN6/PTPRC/PYCARD/RAC2/RASAL3/TNFSF13B/VSIG4	20
BP	GO:1903037	regulation of leukocyte cell-cell adhesion	20/94	344/18800	4.03558e-16	5.48166e-14	3.55768e-14	CCL19/CCL5/CORO1A/CXCL12/HLA-DMA/HLA-DMB/HLA-DPA1/HLA-DPB1/HLA-DRA/IL7R/ITGB2/LAPTM5/LCK/LYN/PTPN6/PTPRC/PYCARD/RASAL3/TNFSF13B/VSIG4	20
BP	GO:0070663	regulation of leukocyte proliferation	18/94	254/18800	4.43592e-16	5.56196e-14	3.60979e-14	CCL19/CCL5/CORO1A/CSF1R/HLA-DMB/HLA-DPA1/HLA-DPB1/LST1/LYN/MNDA/PTPN6/PTPRC/PYCARD/RAC2/RASAL3/TNFSF13B/TYROBP/VSIG4	18
BP	GO:0016064	immunoglobulin mediated immune response	17/94	216/18800	5.42435e-16	6.3155e-14	4.09885e-14	C1QA/C1QB/C1QC/C1S/FCER1G/HLA-DMA/HLA-DMB/HLA-DPA1/HLA-DPB1/HLA-DRA/IGKC/IGLC1/IGLL5/PTPN6/PTPRC/TNFSF13/TRBC1	17
BP	GO:0019724	B cell mediated immunity	17/94	219/18800	6.83972e-16	7.43249e-14	4.8238e-14	C1QA/C1QB/C1QC/C1S/FCER1G/HLA-DMA/HLA-DMB/HLA-DPA1/HLA-DPB1/HLA-DRA/IGKC/IGLC1/IGLL5/PTPN6/PTPRC/TNFSF13/TRBC1	17
BP	GO:0050670	regulation of lymphocyte proliferation	17/94	230/18800	1.55507e-15	1.58423e-13	1.02819e-13	CCL19/CCL5/CORO1A/HLA-DMB/HLA-DPA1/HLA-DPB1/LST1/LYN/MNDA/PTPN6/PTPRC/PYCARD/RAC2/RASAL3/TNFSF13B/TYROBP/VSIG4	17
BP	GO:0032944	regulation of mononuclear cell proliferation	17/94	233/18800	1.9311e-15	1.85159e-13	1.20171e-13	CCL19/CCL5/CORO1A/HLA-DMB/HLA-DPA1/HLA-DPB1/LST1/LYN/MNDA/PTPN6/PTPRC/PYCARD/RAC2/RASAL3/TNFSF13B/TYROBP/VSIG4	17
BP	GO:0070661	leukocyte proliferation	19/94	330/18800	2.8666e-15	2.59586e-13	1.68475e-13	CCL19/CCL5/CORO1A/CSF1R/HLA-DMB/HLA-DPA1/HLA-DPB1/IL7R/LST1/LYN/MNDA/PTPN6/PTPRC/PYCARD/RAC2/RASAL3/TNFSF13B/TYROBP/VSIG4	19
BP	GO:1903039	positive regulation of leukocyte cell-cell adhesion	17/94	245/18800	4.45872e-15	3.82511e-13	2.48256e-13	CCL19/CCL5/CORO1A/HLA-DMA/HLA-DMB/HLA-DPA1/HLA-DPB1/HLA-DRA/IL7R/ITGB2/LCK/LYN/PTPN6/PTPRC/PYCARD/RASAL3/TNFSF13B	17
BP	GO:0046651	lymphocyte proliferation	18/94	296/18800	6.47499e-15	5.27712e-13	3.42493e-13	CCL19/CCL5/CORO1A/HLA-DMB/HLA-DPA1/HLA-DPB1/IL7R/LST1/LYN/MNDA/PTPN6/PTPRC/PYCARD/RAC2/RASAL3/TNFSF13B/TYROBP/VSIG4	18
BP	GO:0032943	mononuclear cell proliferation	18/94	300/18800	8.176e-15	6.34613e-13	4.11873e-13	CCL19/CCL5/CORO1A/HLA-DMB/HLA-DPA1/HLA-DPB1/IL7R/LST1/LYN/MNDA/PTPN6/PTPRC/PYCARD/RAC2/RASAL3/TNFSF13B/TYROBP/VSIG4	18
BP	GO:0050870	positive regulation of T cell activation	16/94	223/18800	1.8122e-14	1.34268e-12	8.71417e-13	CCL19/CCL5/CORO1A/HLA-DMA/HLA-DMB/HLA-DPA1/HLA-DPB1/HLA-DRA/IL7R/LCK/LYN/PTPN6/PTPRC/PYCARD/RASAL3/TNFSF13B	16
BP	GO:0002274	myeloid leukocyte activation	16/94	232/18800	3.36677e-14	2.38602e-12	1.54856e-12	C1QA/CCL5/CD2/CTSC/CX3CR1/FCER1G/ITGAM/ITGB2/LYN/PTPN6/PTPRC/PYCARD/RAC2/TYROBP/VAMP8/VSIG4	16
BP	GO:0022409	positive regulation of cell-cell adhesion	17/94	291/18800	7.60489e-14	5.16499e-12	3.35216e-12	CCL19/CCL5/CORO1A/HLA-DMA/HLA-DMB/HLA-DPA1/HLA-DPB1/HLA-DRA/IL7R/ITGB2/LCK/LYN/PTPN6/PTPRC/PYCARD/RASAL3/TNFSF13B	17
BP	GO:0022407	regulation of cell-cell adhesion	20/94	456/18800	8.49504e-14	5.53877e-12	3.59474e-12	CCL19/CCL5/CORO1A/CXCL12/HLA-DMA/HLA-DMB/HLA-DPA1/HLA-DPB1/HLA-DRA/IL7R/ITGB2/LAPTM5/LCK/LYN/PTPN6/PTPRC/PYCARD/RASAL3/TNFSF13B/VSIG4	20
BP	GO:0006909	phagocytosis	17/94	310/18800	2.13119e-13	1.33609e-11	8.67144e-12	CD14/CORO1A/FCER1G/IGKC/IGLC1/IGLL5/IRF8/ITGAM/ITGB2/LYN/MSR1/NCF2/PTPRC/PYCARD/RAC2/TRBC1/TYROBP	17
BP	GO:0002697	regulation of immune effector process	17/94	353/18800	1.73121e-12	9.98785e-11	6.48226e-11	CCL19/CX3CR1/HLA-DMB/HLA-DRA/IL1R1/IL7R/ITGAM/ITGB2/LAPTM5/LYN/PTPN6/PTPRC/RAC2/TNFSF13/TYROBP/VAMP8/VSIG4	17
BP	GO:0002429	immune response-activating cell surface receptor signaling pathway	16/94	300/18800	1.77698e-12	9.98785e-11	6.48226e-11	BLNK/C3AR1/CD8A/FCER1G/HLA-DPB1/IGKC/IGLC1/IGLL5/LAPTM5/LCK/LYN/MNDA/PTPN6/PTPRC/TRBC1/TYROBP	16
BP	GO:0002757	immune response-activating signal transduction	16/94	300/18800	1.77698e-12	9.98785e-11	6.48226e-11	BLNK/C3AR1/CD8A/FCER1G/HLA-DPB1/IGKC/IGLC1/IGLL5/LAPTM5/LCK/LYN/MNDA/PTPN6/PTPRC/TRBC1/TYROBP	16
BP	GO:0002764	immune response-regulating signaling pathway	19/94	482/18800	2.52286e-12	1.37076e-10	8.89642e-11	BLNK/C3AR1/CD14/CD8A/CTSS/FCER1G/HLA-DPB1/IGKC/IGLC1/IGLL5/LAPTM5/LCK/LYN/MNDA/PIK3AP1/PTPN6/PTPRC/TRBC1/TYROBP	19
BP	GO:0042129	regulation of T cell proliferation	13/94	174/18800	3.65694e-12	1.92284e-10	1.24796e-10	CCL19/CCL5/CORO1A/HLA-DMB/HLA-DPA1/HLA-DPB1/PTPN6/PTPRC/PYCARD/RAC2/RASAL3/TNFSF13B/VSIG4	13
BP	GO:0002495	antigen processing and presentation of peptide antigen via MHC class II	8/94	34/18800	4.7039e-12	2.39605e-10	1.55507e-10	CTSS/FCER1G/HLA-DMA/HLA-DMB/HLA-DPA1/HLA-DPB1/HLA-DRA/PYCARD	8
BP	GO:0002768	immune response-regulating cell surface receptor signaling pathway	16/94	328/18800	6.86962e-12	3.31969e-10	2.15453e-10	BLNK/C3AR1/CD8A/FCER1G/HLA-DPB1/IGKC/IGLC1/IGLL5/LAPTM5/LCK/LYN/MNDA/PTPN6/PTPRC/TRBC1/TYROBP	16
BP	GO:0045785	positive regulation of cell adhesion	18/94	446/18800	6.92451e-12	3.31969e-10	2.15453e-10	CCL19/CCL5/CORO1A/CXCL12/HLA-DMA/HLA-DMB/HLA-DPA1/HLA-DPB1/HLA-DRA/IL7R/ITGB2/LCK/LYN/PTPN6/PTPRC/PYCARD/RASAL3/TNFSF13B	18
BP	GO:0002504	antigen processing and presentation of peptide or polysaccharide antigen via MHC class II	8/94	36/18800	7.77619e-12	3.62148e-10	2.3504e-10	CTSS/FCER1G/HLA-DMA/HLA-DMB/HLA-DPA1/HLA-DPB1/HLA-DRA/PYCARD	8
BP	GO:0042113	B cell activation	16/94	336/18800	9.87474e-12	4.47106e-10	2.90179e-10	BLNK/IGKC/IGLC1/IGLL5/IL7R/IRF8/LAPTM5/LYN/MNDA/PTPN6/PTPRC/TBC1D10C/TNFSF13/TNFSF13B/TRBC1/TYROBP	16
BP	GO:0050864	regulation of B cell activation	13/94	200/18800	2.1397e-11	9.2156e-10	5.98106e-10	IGKC/IGLC1/IGLL5/LAPTM5/LYN/MNDA/PTPN6/PTPRC/TBC1D10C/TNFSF13/TNFSF13B/TRBC1/TYROBP	13
BP	GO:0070665	positive regulation of leukocyte proliferation	12/94	158/18800	2.14842e-11	9.2156e-10	5.98106e-10	CCL19/CCL5/CORO1A/CSF1R/HLA-DMB/HLA-DPA1/HLA-DPB1/LYN/PTPRC/PYCARD/RASAL3/TNFSF13B	12
BP	GO:0002699	positive regulation of immune effector process	14/94	248/18800	2.28517e-11	9.55082e-10	6.19863e-10	CCL19/HLA-DMB/HLA-DRA/IL1R1/ITGAM/ITGB2/LAPTM5/LYN/PTPN6/PTPRC/RAC2/TNFSF13/TYROBP/VAMP8	14
BP	GO:0042098	T cell proliferation	13/94	204/18800	2.74545e-11	1.11877e-09	7.26099e-10	CCL19/CCL5/CORO1A/HLA-DMB/HLA-DPA1/HLA-DPB1/PTPN6/PTPRC/PYCARD/RAC2/RASAL3/TNFSF13B/VSIG4	13
BP	GO:0002275	myeloid cell activation involved in immune response	10/94	93/18800	3.43522e-11	1.36571e-09	8.86367e-10	CX3CR1/FCER1G/ITGAM/ITGB2/LYN/PTPN6/PYCARD/RAC2/TYROBP/VAMP8	10
BP	GO:1903131	mononuclear cell differentiation	17/94	433/18800	4.38126e-11	1.70034e-09	1.10355e-09	BLNK/CCL19/CD2/CD3D/CD8A/CSF1R/EOMES/FCER1G/HLA-DRA/IL7R/IRF8/LCK/LYN/MAFB/PTPN6/PTPRC/TNFSF13B	17
BP	GO:0006959	humoral immune response	15/94	317/18800	5.09696e-11	1.9321e-09	1.25396e-09	BLNK/C1QA/C1QB/C1QC/C1S/GNLY/IGKC/IGLC1/IGLL5/LYZ/PTPN6/PTPRC/RNASE6/TRBC1/VSIG4	15
BP	GO:0032103	positive regulation of response to external stimulus	17/94	442/18800	6.03851e-11	2.23699e-09	1.45184e-09	C3AR1/CASP1/CCL19/CCL5/CCR1/CSF1R/CTSC/CX3CR1/CXCL12/LY86/LYN/MNDA/NKG7/PYCARD/RAC2/TYROBP/VAMP8	17
BP	GO:0050900	leukocyte migration	16/94	384/18800	7.23979e-11	2.62241e-09	1.70198e-09	C3AR1/CCL19/CCL5/CCR1/CORO1A/CSF1R/CX3CR1/CXCL12/FCER1G/IL1R1/ITGB2/LCK/LYN/LYVE1/PYCARD/RAC2	16
BP	GO:0042102	positive regulation of T cell proliferation	10/94	103/18800	9.62984e-11	3.41231e-09	2.21464e-09	CCL19/CCL5/CORO1A/HLA-DMB/HLA-DPA1/HLA-DPB1/PTPRC/PYCARD/RASAL3/TNFSF13B	10
BP	GO:0019886	antigen processing and presentation of exogenous peptide antigen via MHC class II	7/94	30/18800	1.15381e-10	3.92513e-09	2.54747e-09	CTSS/FCER1G/HLA-DMA/HLA-DMB/HLA-DPA1/HLA-DPB1/HLA-DRA	7
BP	GO:0002687	positive regulation of leukocyte migration	11/94	141/18800	1.15587e-10	3.92513e-09	2.54747e-09	C3AR1/CCL19/CCL5/CCR1/CSF1R/CX3CR1/CXCL12/IL1R1/LYVE1/PYCARD/RAC2	11
BP	GO:0001906	cell killing	12/94	185/18800	1.36304e-10	4.53419e-09	2.94276e-09	CORO1A/CTSC/CX3CR1/GNLY/HLA-DRA/IL7R/ITGAM/LYZ/NKG7/PTPN6/PTPRC/TYROBP	12
BP	GO:0019882	antigen processing and presentation	10/94	107/18800	1.41109e-10	4.60014e-09	2.98556e-09	CCL19/CD8A/CTSS/FCER1G/HLA-DMA/HLA-DMB/HLA-DPA1/HLA-DPB1/HLA-DRA/PYCARD	10
BP	GO:0002703	regulation of leukocyte mediated immunity	13/94	236/18800	1.69284e-10	5.41046e-09	3.51147e-09	CX3CR1/HLA-DRA/IL1R1/IL7R/ITGAM/ITGB2/LYN/PTPN6/PTPRC/RAC2/TNFSF13/TYROBP/VAMP8	13
BP	GO:0050851	antigen receptor-mediated signaling pathway	13/94	244/18800	2.5567e-10	8.01426e-09	5.20138e-09	BLNK/CD8A/HLA-DPB1/IGKC/IGLC1/IGLL5/LAPTM5/LCK/LYN/MNDA/PTPN6/PTPRC/TRBC1	13
BP	GO:0019221	cytokine-mediated signaling pathway	17/94	486/18800	2.62172e-10	8.06302e-09	5.23302e-09	CASP1/CCL19/CCL5/CCR1/CSF1R/CX3CR1/CXCL12/FCER1G/IL10RA/IL13RA1/IL1R1/IL7R/LAPTM5/PTPN6/PTPRC/PYCARD/TNFSF13B	17
BP	GO:0002455	humoral immune response mediated by circulating immunoglobulin	10/94	121/18800	4.79915e-10	1.44863e-08	9.40185e-09	C1QA/C1QB/C1QC/C1S/IGKC/IGLC1/IGLL5/PTPN6/PTPRC/TRBC1	10
BP	GO:0030098	lymphocyte differentiation	15/94	382/18800	6.8358e-10	2.01545e-08	1.30806e-08	BLNK/CCL19/CD2/CD3D/CD8A/EOMES/FCER1G/HLA-DRA/IL7R/IRF8/LCK/MAFB/PTPN6/PTPRC/TNFSF13B	15
BP	GO:0002478	antigen processing and presentation of exogenous peptide antigen	7/94	38/18800	6.92424e-10	2.01545e-08	1.30806e-08	CTSS/FCER1G/HLA-DMA/HLA-DMB/HLA-DPA1/HLA-DPB1/HLA-DRA	7
BP	GO:0048002	antigen processing and presentation of peptide antigen	8/94	63/18800	8.91537e-10	2.54073e-08	1.64898e-08	CTSS/FCER1G/HLA-DMA/HLA-DMB/HLA-DPA1/HLA-DPB1/HLA-DRA/PYCARD	8
BP	GO:0002685	regulation of leukocyte migration	12/94	218/18800	9.04065e-10	2.54073e-08	1.64898e-08	C3AR1/CCL19/CCL5/CCR1/CSF1R/CX3CR1/CXCL12/IL1R1/LYN/LYVE1/PYCARD/RAC2	12
BP	GO:0001909	leukocyte mediated cytotoxicity	10/94	131/18800	1.05026e-09	2.85321e-08	1.85178e-08	CORO1A/CTSC/CX3CR1/HLA-DRA/IL7R/ITGAM/NKG7/PTPN6/PTPRC/TYROBP	10
BP	GO:0050853	B cell receptor signaling pathway	10/94	131/18800	1.05026e-09	2.85321e-08	1.85178e-08	BLNK/IGKC/IGLC1/IGLL5/LCK/LYN/MNDA/PTPN6/PTPRC/TRBC1	10
BP	GO:0098883	synapse pruning	5/94	11/18800	1.26609e-09	3.38316e-08	2.19572e-08	C1QA/C1QB/C1QC/CX3CR1/ITGAM	5
BP	GO:1902105	regulation of leukocyte differentiation	13/94	283/18800	1.57102e-09	4.09972e-08	2.66078e-08	C1QC/CCL19/CCR1/CD2/EVI2B/HCLS1/HLA-DRA/IL7R/LYN/MAFB/PTPN6/PTPRC/TYROBP	13
BP	GO:0097529	myeloid leukocyte migration	12/94	229/18800	1.58455e-09	4.09972e-08	2.66078e-08	C3AR1/CCL19/CCL5/CCR1/CSF1R/CX3CR1/CXCL12/FCER1G/IL1R1/ITGB2/LYN/RAC2	12
BP	GO:0001819	positive regulation of cytokine production	16/94	475/18800	1.61115e-09	4.1034e-08	2.66317e-08	C3AR1/CASP1/CCL19/CD14/CD2/CSF1R/FCER1G/HLA-DPA1/HLA-DPB1/IL1R1/IRF8/LAPTM5/MNDA/PTPRC/PYCARD/TYROBP	16
BP	GO:0050671	positive regulation of lymphocyte proliferation	10/94	141/18800	2.15855e-09	5.41298e-08	3.5131e-08	CCL19/CCL5/CORO1A/HLA-DMB/HLA-DPA1/HLA-DPB1/PTPRC/PYCARD/RASAL3/TNFSF13B	10
BP	GO:0030595	leukocyte chemotaxis	12/94	236/18800	2.23012e-09	5.50772e-08	3.57459e-08	C3AR1/CCL19/CCL5/CCR1/CORO1A/CSF1R/CX3CR1/CXCL12/FCER1G/ITGB2/LYN/RAC2	12
BP	GO:0032946	positive regulation of mononuclear cell proliferation	10/94	143/18800	2.47638e-09	6.02463e-08	3.91008e-08	CCL19/CCL5/CORO1A/HLA-DMB/HLA-DPA1/HLA-DPB1/PTPRC/PYCARD/RASAL3/TNFSF13B	10
BP	GO:0001774	microglial cell activation	7/94	47/18800	3.32691e-09	7.85923e-08	5.10076e-08	C1QA/CTSC/CX3CR1/ITGAM/ITGB2/PTPRC/TYROBP	7
BP	GO:0019884	antigen processing and presentation of exogenous antigen	7/94	47/18800	3.32691e-09	7.85923e-08	5.10076e-08	CTSS/FCER1G/HLA-DMA/HLA-DMB/HLA-DPA1/HLA-DPB1/HLA-DRA	7
BP	GO:0002269	leukocyte activation involved in inflammatory response	7/94	50/18800	5.21991e-09	1.21549e-07	7.88873e-08	C1QA/CTSC/CX3CR1/ITGAM/ITGB2/PTPRC/TYROBP	7
BP	GO:0061900	glial cell activation	7/94	54/18800	9.10625e-09	2.09059e-07	1.35682e-07	C1QA/CTSC/CX3CR1/ITGAM/ITGB2/PTPRC/TYROBP	7
BP	GO:0002688	regulation of leukocyte chemotaxis	9/94	124/18800	1.16987e-08	2.58512e-07	1.67778e-07	C3AR1/CCL19/CCL5/CCR1/CSF1R/CX3CR1/CXCL12/LYN/RAC2	9
BP	GO:0002399	MHC class II protein complex assembly	5/94	16/18800	1.17361e-08	2.58512e-07	1.67778e-07	HLA-DMA/HLA-DMB/HLA-DPA1/HLA-DPB1/HLA-DRA	5
BP	GO:0002503	peptide antigen assembly with MHC class II protein complex	5/94	16/18800	1.17361e-08	2.58512e-07	1.67778e-07	HLA-DMA/HLA-DMB/HLA-DPA1/HLA-DPB1/HLA-DRA	5
BP	GO:0002886	regulation of myeloid leukocyte mediated immunity	7/94	59/18800	1.71893e-08	3.73581e-07	2.4246e-07	CX3CR1/ITGAM/ITGB2/LYN/RAC2/TYROBP/VAMP8	7
BP	GO:0006956	complement activation	9/94	131/18800	1.89421e-08	4.06258e-07	2.63667e-07	C1QA/C1QB/C1QC/C1S/IGKC/IGLC1/IGLL5/TRBC1/VSIG4	9
BP	GO:0002690	positive regulation of leukocyte chemotaxis	8/94	94/18800	2.25838e-08	4.78072e-07	3.10276e-07	C3AR1/CCL19/CCL5/CCR1/CSF1R/CX3CR1/CXCL12/RAC2	8
BP	GO:0002683	negative regulation of immune system process	14/94	425/18800	2.47298e-08	5.16789e-07	3.35404e-07	C1QC/CX3CR1/CXCL12/IL7R/LAPTM5/LST1/LYN/MAFB/MNDA/PTPN6/PTPRC/TBC1D10C/TYROBP/VSIG4	14
BP	GO:0002819	regulation of adaptive immune response	10/94	188/18800	3.43825e-08	7.09411e-07	4.60418e-07	CCL19/CD48/HLA-DRA/IL1R1/IL7R/PTPN6/PTPRC/PYCARD/TNFSF13/TNFSF13B	10
BP	GO:1903706	regulation of hemopoiesis	13/94	371/18800	3.97509e-08	8.09924e-07	5.25653e-07	C1QC/CCL19/CCR1/CD2/EVI2B/HCLS1/HLA-DRA/IL7R/LYN/MAFB/PTPN6/PTPRC/TYROBP	13
BP	GO:0002396	MHC protein complex assembly	5/94	20/18800	4.10037e-08	8.15074e-07	5.28995e-07	HLA-DMA/HLA-DMB/HLA-DPA1/HLA-DPB1/HLA-DRA	5
BP	GO:0002501	peptide antigen assembly with MHC protein complex	5/94	20/18800	4.10037e-08	8.15074e-07	5.28995e-07	HLA-DMA/HLA-DMB/HLA-DPA1/HLA-DPB1/HLA-DRA	5
BP	GO:0150146	cell junction disassembly	5/94	21/18800	5.36052e-08	1.05273e-06	6.83237e-07	C1QA/C1QB/C1QC/CX3CR1/ITGAM	5
BP	GO:0060326	cell chemotaxis	12/94	315/18800	5.56045e-08	1.07899e-06	7.00283e-07	C3AR1/CCL19/CCL5/CCR1/CORO1A/CSF1R/CX3CR1/CXCL12/FCER1G/ITGB2/LYN/RAC2	12
BP	GO:0042116	macrophage activation	8/94	106/18800	5.82655e-08	1.11733e-06	7.25162e-07	C1QA/CTSC/CX3CR1/ITGAM/ITGB2/PTPRC/TYROBP/VSIG4	8
BP	GO:0002285	lymphocyte activation involved in immune response	10/94	201/18800	6.46585e-08	1.2255e-06	7.95371e-07	CCL19/CORO1A/EOMES/FCER1G/HLA-DMB/HLA-DRA/IRF8/NKG7/PTPRC/TNFSF13	10
BP	GO:0006958	complement activation, classical pathway	8/94	108/18800	6.74598e-08	1.2639e-06	8.20292e-07	C1QA/C1QB/C1QC/C1S/IGKC/IGLC1/IGLL5/TRBC1	8
BP	GO:0002381	immunoglobulin production involved in immunoglobulin-mediated immune response	7/94	73/18800	7.75669e-08	1.42061e-06	9.21996e-07	HLA-DMA/HLA-DMB/HLA-DPA1/HLA-DPB1/HLA-DRA/PTPRC/TNFSF13	7
BP	GO:0150076	neuroinflammatory response	7/94	73/18800	7.75669e-08	1.42061e-06	9.21996e-07	C1QA/CTSC/CX3CR1/ITGAM/ITGB2/PTPRC/TYROBP	7
BP	GO:0030217	T cell differentiation	11/94	263/18800	8.07183e-08	1.4619e-06	9.48794e-07	CCL19/CD2/CD3D/CD8A/EOMES/FCER1G/HLA-DRA/IL7R/LCK/MAFB/PTPRC	11
BP	GO:0043299	leukocyte degranulation	7/94	76/18800	1.02818e-07	1.84168e-06	1.19528e-06	CORO1A/ITGAM/ITGB2/LYN/NKG7/RAC2/VAMP8	7
BP	GO:0032729	positive regulation of interferon-gamma production	7/94	77/18800	1.12642e-07	1.99573e-06	1.29526e-06	CD14/CD2/HLA-DPA1/HLA-DPB1/IL1R1/IRF8/PYCARD	7
BP	GO:0071675	regulation of mononuclear cell migration	8/94	116/18800	1.17841e-07	2.06538e-06	1.34046e-06	C3AR1/CCL5/CCR1/CSF1R/CX3CR1/CXCL12/LYN/PYCARD	8
BP	GO:0032609	interferon-gamma production	8/94	117/18800	1.25975e-07	2.16147e-06	1.40283e-06	CD14/CD2/HLA-DPA1/HLA-DPB1/IL1R1/IRF8/LAPTM5/PYCARD	8
BP	GO:0032649	regulation of interferon-gamma production	8/94	117/18800	1.25975e-07	2.16147e-06	1.40283e-06	CD14/CD2/HLA-DPA1/HLA-DPB1/IL1R1/IRF8/LAPTM5/PYCARD	8
BP	GO:0090025	regulation of monocyte chemotaxis	5/94	28/18800	2.5184e-07	4.24374e-06	2.75425e-06	CCL5/CCR1/CX3CR1/CXCL12/LYN	5
BP	GO:0006911	phagocytosis, engulfment	8/94	128/18800	2.52541e-07	4.24374e-06	2.75425e-06	IGKC/IGLC1/IGLL5/ITGAM/ITGB2/MSR1/RAC2/TRBC1	8
BP	GO:0042742	defense response to bacterium	12/94	364/18800	2.65819e-07	4.42127e-06	2.86947e-06	FCER1G/GNLY/IGKC/IGLC1/IGLL5/IL7R/IRF8/LYZ/MPEG1/PYCARD/RNASE6/TRBC1	12
BP	GO:0006968	cellular defense response	6/94	54/18800	2.83004e-07	4.65955e-06	3.02412e-06	CX3CR1/GNLY/LSP1/MNDA/NCF2/TYROBP	6
BP	GO:0099024	plasma membrane invagination	8/94	137/18800	4.25582e-07	6.93699e-06	4.50221e-06	IGKC/IGLC1/IGLL5/ITGAM/ITGB2/MSR1/RAC2/TRBC1	8
BP	GO:0002440	production of molecular mediator of immune response	11/94	312/18800	4.47721e-07	7.22559e-06	4.68952e-06	HLA-DMA/HLA-DMB/HLA-DPA1/HLA-DPB1/HLA-DRA/IGKC/IGLV1-44/IL1R1/LAPTM5/PTPRC/TNFSF13	11
BP	GO:0050921	positive regulation of chemotaxis	8/94	140/18800	5.02239e-07	8.02597e-06	5.20898e-06	C3AR1/CCL19/CCL5/CCR1/CSF1R/CX3CR1/CXCL12/RAC2	8
BP	GO:0002695	negative regulation of leukocyte activation	9/94	193/18800	5.27077e-07	8.34113e-06	5.41352e-06	LAPTM5/LST1/LYN/MNDA/PTPN6/PTPRC/TBC1D10C/TYROBP/VSIG4	9
BP	GO:0010324	membrane invagination	8/94	144/18800	6.22604e-07	9.75812e-06	6.33317e-06	IGKC/IGLC1/IGLL5/ITGAM/ITGB2/MSR1/RAC2/TRBC1	8
BP	GO:0071674	mononuclear cell migration	9/94	199/18800	6.81418e-07	1.05782e-05	6.86542e-06	C3AR1/CCL19/CCL5/CCR1/CSF1R/CX3CR1/CXCL12/LYN/PYCARD	9
BP	GO:0050869	negative regulation of B cell activation	5/94	35/18800	8.09194e-07	1.24433e-05	8.07586e-06	LAPTM5/LYN/MNDA/TBC1D10C/TYROBP	5
BP	GO:0002444	myeloid leukocyte mediated immunity	7/94	104/18800	8.91921e-07	1.35872e-05	8.81831e-06	CX3CR1/ITGAM/ITGB2/LYN/RAC2/TYROBP/VAMP8	7
BP	GO:0097530	granulocyte migration	8/94	154/18800	1.03625e-06	1.56397e-05	1.01504e-05	C3AR1/CCL19/CCL5/CSF1R/FCER1G/IL1R1/ITGB2/RAC2	8
BP	GO:0002573	myeloid leukocyte differentiation	9/94	210/18800	1.06768e-06	1.59662e-05	1.03623e-05	C1QC/CCL19/CCR1/CSF1R/EVI2B/HCLS1/LYN/MAFB/TYROBP	9
BP	GO:1902107	positive regulation of leukocyte differentiation	8/94	157/18800	1.19881e-06	1.76041e-05	1.14254e-05	CCL19/CCR1/EVI2B/HCLS1/HLA-DRA/IL7R/PTPRC/TYROBP	8
BP	GO:1903708	positive regulation of hemopoiesis	8/94	157/18800	1.19881e-06	1.76041e-05	1.14254e-05	CCL19/CCR1/EVI2B/HCLS1/HLA-DRA/IL7R/PTPRC/TYROBP	8
BP	GO:0002548	monocyte chemotaxis	6/94	70/18800	1.34737e-06	1.94602e-05	1.26299e-05	CCL19/CCL5/CCR1/CX3CR1/CXCL12/LYN	6
BP	GO:0050866	negative regulation of cell activation	9/94	216/18800	1.34908e-06	1.94602e-05	1.26299e-05	LAPTM5/LST1/LYN/MNDA/PTPN6/PTPRC/TBC1D10C/TYROBP/VSIG4	9
BP	GO:0071222	cellular response to lipopolysaccharide	9/94	217/18800	1.40172e-06	2.00421e-05	1.30076e-05	CASP1/CCL5/CD14/CX3CR1/IRF8/LY86/LYN/MRC1/PYCARD	9
BP	GO:0051250	negative regulation of lymphocyte activation	8/94	161/18800	1.44901e-06	2.0461e-05	1.32795e-05	LAPTM5/LST1/LYN/MNDA/PTPN6/TBC1D10C/TYROBP/VSIG4	8
BP	GO:0002377	immunoglobulin production	9/94	218/18800	1.45612e-06	2.0461e-05	1.32795e-05	HLA-DMA/HLA-DMB/HLA-DPA1/HLA-DPB1/HLA-DRA/IGKC/IGLV1-44/PTPRC/TNFSF13	9
BP	GO:0042119	neutrophil activation	5/94	41/18800	1.82429e-06	2.54153e-05	1.64949e-05	CCL5/FCER1G/ITGAM/ITGB2/TYROBP	5
BP	GO:0050920	regulation of chemotaxis	9/94	225/18800	1.89065e-06	2.61166e-05	1.69501e-05	C3AR1/CCL19/CCL5/CCR1/CSF1R/CX3CR1/CXCL12/LYN/RAC2	9
BP	GO:0002761	regulation of myeloid leukocyte differentiation	7/94	117/18800	1.97547e-06	2.7059e-05	1.75617e-05	C1QC/CCR1/EVI2B/HCLS1/LYN/MAFB/TYROBP	7
BP	GO:0002283	neutrophil activation involved in immune response	4/94	19/18800	2.14462e-06	2.9131e-05	1.89065e-05	FCER1G/ITGAM/ITGB2/TYROBP	4
BP	GO:0071219	cellular response to molecule of bacterial origin	9/94	229/18800	2.18595e-06	2.94471e-05	1.91116e-05	CASP1/CCL5/CD14/CX3CR1/IRF8/LY86/LYN/MRC1/PYCARD	9
BP	GO:0002822	regulation of adaptive immune response based on somatic recombination of immune receptors built from immunoglobulin superfamily domains	8/94	173/18800	2.48322e-06	3.31775e-05	2.15327e-05	CCL19/HLA-DRA/IL1R1/IL7R/PTPN6/PTPRC/TNFSF13/TNFSF13B	8
BP	GO:0090026	positive regulation of monocyte chemotaxis	4/94	20/18800	2.67052e-06	3.53898e-05	2.29685e-05	CCL5/CCR1/CX3CR1/CXCL12	4
BP	GO:0006874	cellular calcium ion homeostasis	12/94	456/18800	2.83415e-06	3.72553e-05	2.41793e-05	C3AR1/CCL19/CCL5/CCR1/CD52/CORO1A/CX3CR1/CXCL12/LCK/LYN/PTPN6/PTPRC	12
BP	GO:0031295	T cell costimulation	5/94	45/18800	2.92763e-06	3.81763e-05	2.4777e-05	CCL19/LCK/LYN/PTPN6/TNFSF13B	5
BP	GO:0071621	granulocyte chemotaxis	7/94	128/18800	3.60115e-06	4.53765e-05	2.945e-05	C3AR1/CCL19/CCL5/CSF1R/FCER1G/ITGB2/RAC2	7
BP	GO:1990266	neutrophil migration	7/94	128/18800	3.60115e-06	4.53765e-05	2.945e-05	C3AR1/CCL19/CCL5/FCER1G/IL1R1/ITGB2/RAC2	7
BP	GO:0032640	tumor necrosis factor production	8/94	182/18800	3.62144e-06	4.53765e-05	2.945e-05	CCL19/CD14/CD2/CX3CR1/PTPN6/PTPRC/PYCARD/TYROBP	8
BP	GO:0032680	regulation of tumor necrosis factor production	8/94	182/18800	3.62144e-06	4.53765e-05	2.945e-05	CCL19/CD14/CD2/CX3CR1/PTPN6/PTPRC/PYCARD/TYROBP	8
BP	GO:0031294	lymphocyte costimulation	5/94	47/18800	3.64682e-06	4.53765e-05	2.945e-05	CCL19/LCK/LYN/PTPN6/TNFSF13B	5
BP	GO:0036230	granulocyte activation	5/94	47/18800	3.64682e-06	4.53765e-05	2.945e-05	CCL5/FCER1G/ITGAM/ITGB2/TYROBP	5
BP	GO:0055074	calcium ion homeostasis	12/94	468/18800	3.69989e-06	4.56881e-05	2.96523e-05	C3AR1/CCL19/CCL5/CCR1/CD52/CORO1A/CX3CR1/CXCL12/LCK/LYN/PTPN6/PTPRC	12
BP	GO:0050672	negative regulation of lymphocyte proliferation	6/94	84/18800	3.94904e-06	4.8398e-05	3.1411e-05	LST1/LYN/MNDA/PTPN6/TYROBP/VSIG4	6
BP	GO:0030099	myeloid cell differentiation	11/94	391/18800	4.02725e-06	4.89882e-05	3.17941e-05	C1QC/CCL19/CCR1/CSF1R/EVI2B/HCLS1/IRF8/LYN/MAFB/PTPN6/TYROBP	11
BP	GO:0001910	regulation of leukocyte mediated cytotoxicity	6/94	85/18800	4.23197e-06	5.03512e-05	3.26787e-05	CX3CR1/HLA-DRA/IL7R/ITGAM/PTPRC/TYROBP	6
BP	GO:0032945	negative regulation of mononuclear cell proliferation	6/94	85/18800	4.23197e-06	5.03512e-05	3.26787e-05	LST1/LYN/MNDA/PTPN6/TYROBP/VSIG4	6
BP	GO:2000106	regulation of leukocyte apoptotic process	6/94	85/18800	4.23197e-06	5.03512e-05	3.26787e-05	CCL19/CCL5/CXCL12/HCLS1/IL7R/LYN	6
BP	GO:0071706	tumor necrosis factor superfamily cytokine production	8/94	187/18800	4.42628e-06	5.19053e-05	3.36873e-05	CCL19/CD14/CD2/CX3CR1/PTPN6/PTPRC/PYCARD/TYROBP	8
BP	GO:1903555	regulation of tumor necrosis factor superfamily cytokine production	8/94	187/18800	4.42628e-06	5.19053e-05	3.36873e-05	CCL19/CD14/CD2/CX3CR1/PTPN6/PTPRC/PYCARD/TYROBP	8
BP	GO:0043300	regulation of leukocyte degranulation	5/94	49/18800	4.49787e-06	5.2368e-05	3.39876e-05	ITGAM/ITGB2/LYN/RAC2/VAMP8	5
BP	GO:2000107	negative regulation of leukocyte apoptotic process	5/94	50/18800	4.97797e-06	5.75467e-05	3.73487e-05	CCL19/CCL5/CXCL12/HCLS1/IL7R	5
BP	GO:0007204	positive regulation of cytosolic calcium ion concentration	10/94	325/18800	5.19553e-06	5.96388e-05	3.87065e-05	C3AR1/CCL19/CCR1/CD52/CORO1A/CX3CR1/LCK/LYN/PTPN6/PTPRC	10
BP	GO:0071216	cellular response to biotic stimulus	9/94	256/18800	5.42982e-06	6.18923e-05	4.01691e-05	CASP1/CCL5/CD14/CX3CR1/IRF8/LY86/LYN/MRC1/PYCARD	9
BP	GO:0071622	regulation of granulocyte chemotaxis	5/94	51/18800	5.49734e-06	6.22269e-05	4.03862e-05	C3AR1/CCL19/CCL5/CSF1R/RAC2	5
BP	GO:0002705	positive regulation of leukocyte mediated immunity	7/94	138/18800	5.92765e-06	6.66349e-05	4.32471e-05	HLA-DRA/IL1R1/ITGAM/ITGB2/PTPRC/TNFSF13/TYROBP	7
BP	GO:0070664	negative regulation of leukocyte proliferation	6/94	91/18800	6.29662e-06	7.02978e-05	4.56244e-05	LST1/LYN/MNDA/PTPN6/TYROBP/VSIG4	6
BP	GO:0072503	cellular divalent inorganic cation homeostasis	12/94	494/18800	6.41496e-06	7.08665e-05	4.59934e-05	C3AR1/CCL19/CCL5/CCR1/CD52/CORO1A/CX3CR1/CXCL12/LCK/LYN/PTPN6/PTPRC	12
BP	GO:0032496	response to lipopolysaccharide	10/94	333/18800	6.4345e-06	7.08665e-05	4.59934e-05	CASP1/CCL5/CD14/CX3CR1/IL10RA/IRF8/LY86/LYN/MRC1/PYCARD	10
BP	GO:1905523	positive regulation of macrophage migration	4/94	25/18800	6.84031e-06	7.48303e-05	4.8566e-05	C3AR1/CCL5/CSF1R/CX3CR1	4
BP	GO:0031341	regulation of cell killing	6/94	100/18800	1.08617e-05	0.000117249	7.60966e-05	CX3CR1/HLA-DRA/IL7R/ITGAM/PTPRC/TYROBP	6
BP	GO:0042100	B cell proliferation	6/94	100/18800	1.08617e-05	0.000117249	7.60966e-05	IL7R/LYN/MNDA/PTPRC/TNFSF13B/TYROBP	6
BP	GO:0002237	response to molecule of bacterial origin	10/94	354/18800	1.09745e-05	0.000117687	7.63805e-05	CASP1/CCL5/CD14/CX3CR1/IL10RA/IRF8/LY86/LYN/MRC1/PYCARD	10
BP	GO:0050871	positive regulation of B cell activation	7/94	152/18800	1.11764e-05	0.000119069	7.72777e-05	IGKC/IGLC1/IGLL5/PTPRC/TNFSF13/TNFSF13B/TRBC1	7
BP	GO:0051480	regulation of cytosolic calcium ion concentration	10/94	356/18800	1.15244e-05	0.000121979	7.9166e-05	C3AR1/CCL19/CCR1/CD52/CORO1A/CX3CR1/LCK/LYN/PTPN6/PTPRC	10
BP	GO:0032760	positive regulation of tumor necrosis factor production	6/94	103/18800	1.28728e-05	0.000135372	8.78584e-05	CCL19/CD14/CD2/PTPRC/PYCARD/TYROBP	6
BP	GO:0031349	positive regulation of defense response	9/94	289/18800	1.43656e-05	0.000150102	9.74187e-05	CASP1/CCL5/CTSC/LYN/MNDA/NKG7/PYCARD/TYROBP/VAMP8	9
BP	GO:0032731	positive regulation of interleukin-1 beta production	5/94	62/18800	1.45014e-05	0.000150556	9.7713e-05	CASP1/CCL19/MNDA/PYCARD/TYROBP	5
BP	GO:0030593	neutrophil chemotaxis	6/94	106/18800	1.51748e-05	0.00015655	0.000101603	C3AR1/CCL19/CCL5/FCER1G/ITGB2/RAC2	6
BP	GO:1903557	positive regulation of tumor necrosis factor superfamily cytokine production	6/94	107/18800	1.6012e-05	0.000164148	0.000106534	CCL19/CD14/CD2/PTPRC/PYCARD/TYROBP	6
BP	GO:0030888	regulation of B cell proliferation	5/94	64/18800	1.69523e-05	0.000172702	0.000112086	LYN/MNDA/PTPRC/TNFSF13B/TYROBP	5
BP	GO:0071887	leukocyte apoptotic process	6/94	109/18800	1.77983e-05	0.000180194	0.000116949	CCL19/CCL5/CXCL12/HCLS1/IL7R/LYN	6
BP	GO:0032611	interleukin-1 beta production	6/94	110/18800	1.87499e-05	0.000187499	0.00012169	CASP1/CCL19/CX3CR1/MNDA/PYCARD/TYROBP	6
BP	GO:0032651	regulation of interleukin-1 beta production	6/94	110/18800	1.87499e-05	0.000187499	0.00012169	CASP1/CCL19/CX3CR1/MNDA/PYCARD/TYROBP	6
BP	GO:1902624	positive regulation of neutrophil migration	4/94	32/18800	1.89309e-05	0.000188154	0.000122115	C3AR1/CCL19/IL1R1/RAC2	4
BP	GO:0097048	dendritic cell apoptotic process	3/94	11/18800	1.94021e-05	0.000190515	0.000123647	CCL19/CXCL12/LYN	3
BP	GO:2000668	regulation of dendritic cell apoptotic process	3/94	11/18800	1.94021e-05	0.000190515	0.000123647	CCL19/CXCL12/LYN	3
BP	GO:0050854	regulation of antigen receptor-mediated signaling pathway	5/94	66/18800	1.97145e-05	0.000191012	0.00012397	LAPTM5/LCK/LYN/PTPN6/PTPRC	5
BP	GO:0071677	positive regulation of mononuclear cell migration	5/94	66/18800	1.97145e-05	0.000191012	0.00012397	CCL5/CCR1/CX3CR1/CXCL12/PYCARD	5
BP	GO:0001959	regulation of cytokine-mediated signaling pathway	7/94	166/18800	1.98043e-05	0.000191012	0.00012397	CASP1/CCL5/IL1R1/LAPTM5/PTPN6/PTPRC/PYCARD	7
BP	GO:0002456	T cell mediated immunity	6/94	112/18800	2.07763e-05	0.000199208	0.000129289	CD8A/CTSC/HLA-DRA/IL1R1/IL7R/PTPRC	6
BP	GO:0002821	positive regulation of adaptive immune response	6/94	115/18800	2.41434e-05	0.000229605	0.000149017	HLA-DRA/IL1R1/PTPRC/PYCARD/TNFSF13/TNFSF13B	6
BP	GO:0033006	regulation of mast cell activation involved in immune response	4/94	34/18800	2.42282e-05	0.000229605	0.000149017	LYN/PTPN6/RAC2/VAMP8	4
BP	GO:0070372	regulation of ERK1 and ERK2 cascade	9/94	311/18800	2.56441e-05	0.000241618	0.000156814	CCL19/CCL5/CCR1/CSF1R/LYN/PTPN6/PTPRC/PYCARD/TBC1D10C	9
BP	GO:0007259	receptor signaling pathway via JAK-STAT	7/94	173/18800	2.58412e-05	0.000242076	0.000157111	CCL5/CSF1R/HCLS1/IL10RA/IL7R/LYN/PTPRC	7
BP	GO:0050727	regulation of inflammatory response	10/94	394/18800	2.75433e-05	0.000256546	0.000166502	CASP1/CCL5/CTSC/IL1R1/LYN/NKG7/PIK3AP1/PTPRC/PYCARD/VAMP8	10
BP	GO:0071346	cellular response to interferon-gamma	6/94	118/18800	2.79367e-05	0.000258732	0.000167921	CASP1/CCL19/CCL5/HLA-DPA1/IRF8/MRC1	6
BP	GO:0060759	regulation of response to cytokine stimulus	7/94	178/18800	3.10219e-05	0.000285682	0.000185412	CASP1/CCL5/IL1R1/LAPTM5/PTPN6/PTPRC/PYCARD	7
BP	GO:0051209	release of sequestered calcium ion into cytosol	6/94	121/18800	3.21954e-05	0.000293526	0.000190503	CCL19/CORO1A/LCK/LYN/PTPN6/PTPRC	6
BP	GO:0032732	positive regulation of interleukin-1 production	5/94	73/18800	3.22339e-05	0.000293526	0.000190503	CASP1/CCL19/MNDA/PYCARD/TYROBP	5
BP	GO:0051283	negative regulation of sequestering of calcium ion	6/94	122/18800	3.37254e-05	0.000305402	0.000198211	CCL19/CORO1A/LCK/LYN/PTPN6/PTPRC	6
BP	GO:0051282	regulation of sequestering of calcium ion	6/94	124/18800	3.69607e-05	0.000332851	0.000216025	CCL19/CORO1A/LCK/LYN/PTPN6/PTPRC	6
BP	GO:0097696	receptor signaling pathway via STAT	7/94	184/18800	3.8338e-05	0.000343357	0.000222844	CCL5/CSF1R/HCLS1/IL10RA/IL7R/LYN/PTPRC	7
BP	GO:0050852	T cell receptor signaling pathway	6/94	127/18800	4.22764e-05	0.00037656	0.000244393	CD8A/HLA-DPB1/LAPTM5/LCK/PTPN6/PTPRC	6
BP	GO:0051208	sequestering of calcium ion	6/94	128/18800	4.41784e-05	0.000391363	0.000254001	CCL19/CORO1A/LCK/LYN/PTPN6/PTPRC	6
BP	GO:0070371	ERK1 and ERK2 cascade	9/94	335/18800	4.57797e-05	0.000402257	0.000261071	CCL19/CCL5/CCR1/CSF1R/LYN/PTPN6/PTPRC/PYCARD/TBC1D10C	9
BP	GO:0032612	interleukin-1 production	6/94	129/18800	4.61485e-05	0.000402257	0.000261071	CASP1/CCL19/CX3CR1/MNDA/PYCARD/TYROBP	6
BP	GO:0032652	regulation of interleukin-1 production	6/94	129/18800	4.61485e-05	0.000402257	0.000261071	CASP1/CCL19/CX3CR1/MNDA/PYCARD/TYROBP	6
BP	GO:0014068	positive regulation of phosphatidylinositol 3-kinase signaling	5/94	79/18800	4.72376e-05	0.00040956	0.000265811	CCL5/HCLS1/HCST/PIK3AP1/PTPN6	5
BP	GO:1905521	regulation of macrophage migration	4/94	41/18800	5.15095e-05	0.000444235	0.000288316	C3AR1/CCL5/CSF1R/CX3CR1	4
BP	GO:0030852	regulation of granulocyte differentiation	3/94	15/18800	5.27315e-05	0.00045238	0.000293602	C1QC/EVI2B/HCLS1	3
BP	GO:0042554	superoxide anion generation	4/94	43/18800	6.22929e-05	0.000531609	0.000345022	ITGAM/ITGB2/NCF2/TYROBP	4
BP	GO:0033627	cell adhesion mediated by integrin	5/94	86/18800	7.10127e-05	0.000602868	0.000391271	CCL5/ITGAM/ITGB2/LYN/PTPN6	5
BP	GO:0034341	response to interferon-gamma	6/94	140/18800	7.28384e-05	0.000615164	0.000399251	CASP1/CCL19/CCL5/HLA-DPA1/IRF8/MRC1	6
BP	GO:0033003	regulation of mast cell activation	4/94	45/18800	7.46349e-05	0.000621079	0.00040309	LYN/PTPN6/RAC2/VAMP8	4
BP	GO:1902622	regulation of neutrophil migration	4/94	45/18800	7.46349e-05	0.000621079	0.00040309	C3AR1/CCL19/IL1R1/RAC2	4
BP	GO:0006887	exocytosis	9/94	357/18800	7.46819e-05	0.000621079	0.00040309	CCL5/CCR1/CORO1A/ITGAM/ITGB2/LYN/NKG7/RAC2/VAMP8	9
BP	GO:0045637	regulation of myeloid cell differentiation	7/94	208/18800	8.31906e-05	0.000688329	0.000446736	C1QC/CCR1/EVI2B/HCLS1/LYN/MAFB/TYROBP	7
BP	GO:0070098	chemokine-mediated signaling pathway	5/94	89/18800	8.36442e-05	0.000688586	0.000446903	CCL19/CCL5/CCR1/CX3CR1/CXCL12	5
BP	GO:0048872	homeostasis of number of cells	8/94	282/18800	8.46929e-05	0.000693716	0.000450232	CORO1A/CX3CR1/HCLS1/IL7R/LIPA/LYN/MAFB/TNFSF13B	8
BP	GO:0010759	positive regulation of macrophage chemotaxis	3/94	18/18800	9.35453e-05	0.000758601	0.000492343	C3AR1/CCL5/CSF1R	3
BP	GO:0030889	negative regulation of B cell proliferation	3/94	18/18800	9.35453e-05	0.000758601	0.000492343	LYN/MNDA/TYROBP	3
BP	GO:0030101	natural killer cell activation	5/94	93/18800	0.000103097	0.00083192	0.000539929	CD2/CORO1A/NKG7/PTPRC/TYROBP	5
BP	GO:0002888	positive regulation of myeloid leukocyte mediated immunity	3/94	19/18800	0.000110683	0.000884378	0.000573975	ITGAM/ITGB2/TYROBP	3
BP	GO:0032930	positive regulation of superoxide anion generation	3/94	19/18800	0.000110683	0.000884378	0.000573975	ITGAM/ITGB2/TYROBP	3
BP	GO:0001913	T cell mediated cytotoxicity	4/94	50/18800	0.000113181	0.000899925	0.000584065	CTSC/HLA-DRA/IL7R/PTPRC	4
BP	GO:0051651	maintenance of location in cell	7/94	219/18800	0.000114734	0.000907846	0.000589206	CCL19/CORO1A/FTL/LCK/LYN/PTPN6/PTPRC	7
BP	GO:0097553	calcium ion transmembrane import into cytosol	6/94	154/18800	0.00012324	0.000970443	0.000629832	CCL19/CORO1A/LCK/LYN/PTPN6/PTPRC	6
BP	GO:1990868	response to chemokine	5/94	97/18800	0.00012585	0.000981512	0.000637016	CCL19/CCL5/CCR1/CX3CR1/CXCL12	5
BP	GO:1990869	cellular response to chemokine	5/94	97/18800	0.00012585	0.000981512	0.000637016	CCL19/CCL5/CCR1/CX3CR1/CXCL12	5
BP	GO:0002279	mast cell activation involved in immune response	4/94	52/18800	0.000132036	0.00102485	0.000665143	LYN/PTPN6/RAC2/VAMP8	4
BP	GO:0046631	alpha-beta T cell activation	6/94	158/18800	0.000141817	0.00109555	0.000711029	CCL19/EOMES/HLA-DRA/NKG7/PTPRC/RASAL3	6
BP	GO:0045088	regulation of innate immune response	7/94	231/18800	0.000159599	0.0012271	0.00079641	CCL5/LYN/MNDA/PTPN6/PYCARD/TYROBP/VSIG4	7
BP	GO:0002763	positive regulation of myeloid leukocyte differentiation	4/94	55/18800	0.000164444	0.00125254	0.000812917	CCR1/EVI2B/HCLS1/TYROBP	4
BP	GO:1905517	macrophage migration	4/94	55/18800	0.000164444	0.00125254	0.000812917	C3AR1/CCL5/CSF1R/CX3CR1	4
BP	GO:0045055	regulated exocytosis	7/94	234/18800	0.000172788	0.00130997	0.000850193	CORO1A/ITGAM/ITGB2/LYN/NKG7/RAC2/VAMP8	7
BP	GO:0032928	regulation of superoxide anion generation	3/94	22/18800	0.000174002	0.00131238	0.000851756	ITGAM/ITGB2/TYROBP	3
BP	GO:0050830	defense response to Gram-positive bacterium	5/94	104/18800	0.000174716	0.00131238	0.000851756	IL7R/LYZ/MPEG1/PYCARD/RNASE6	5
BP	GO:0001912	positive regulation of leukocyte mediated cytotoxicity	4/94	58/18800	0.00020224	0.00151216	0.000981413	HLA-DRA/ITGAM/PTPRC/TYROBP	4
BP	GO:0002218	activation of innate immune response	4/94	59/18800	0.000216122	0.00160858	0.00104399	LYN/MNDA/PYCARD/TYROBP	4
BP	GO:0060402	calcium ion transport into cytosol	6/94	171/18800	0.000217982	0.00161505	0.00104819	CCL19/CORO1A/LCK/LYN/PTPN6/PTPRC	6
BP	GO:0019835	cytolysis	3/94	24/18800	0.000227037	0.00166008	0.00107742	GZMA/GZMH/LYZ	3
BP	GO:0090023	positive regulation of neutrophil chemotaxis	3/94	24/18800	0.000227037	0.00166008	0.00107742	C3AR1/CCL19/RAC2	3
BP	GO:0002824	positive regulation of adaptive immune response based on somatic recombination of immune receptors built from immunoglobulin superfamily domains	5/94	110/18800	0.000227116	0.00166008	0.00107742	HLA-DRA/IL1R1/PTPRC/TNFSF13/TNFSF13B	5
BP	GO:0006898	receptor-mediated endocytosis	7/94	246/18800	0.000234667	0.00170762	0.00110827	CCL19/CD14/FCER1G/ITGAM/ITGB2/MRC1/MSR1	7
BP	GO:0014066	regulation of phosphatidylinositol 3-kinase signaling	5/94	111/18800	0.000236897	0.00171619	0.00111383	CCL5/HCLS1/HCST/PIK3AP1/PTPN6	5
BP	GO:0034113	heterotypic cell-cell adhesion	4/94	61/18800	0.000245927	0.00176581	0.00114604	CD2/ITGB2/LCK/PTPRC	4
BP	GO:0002706	regulation of lymphocyte mediated immunity	6/94	175/18800	0.000246961	0.00176581	0.00114604	HLA-DRA/IL1R1/IL7R/PTPN6/PTPRC/TNFSF13	6
BP	GO:0002698	negative regulation of immune effector process	5/94	112/18800	0.000246996	0.00176581	0.00114604	CX3CR1/IL7R/PTPN6/PTPRC/VSIG4	5
BP	GO:0034612	response to tumor necrosis factor	7/94	249/18800	0.000252638	0.00179825	0.00116709	CASP1/CCL19/CCL5/CD14/LAPTM5/PYCARD/TNFSF13B	7
BP	GO:0051235	maintenance of location	8/94	331/18800	0.000253797	0.00179865	0.00116735	CCL19/CORO1A/FTL/LCK/LYN/MSR1/PTPN6/PTPRC	8
BP	GO:0001911	negative regulation of leukocyte mediated cytotoxicity	3/94	25/18800	0.000257064	0.0018061	0.00117218	CX3CR1/IL7R/PTPRC	3
BP	GO:0043302	positive regulation of leukocyte degranulation	3/94	25/18800	0.000257064	0.0018061	0.00117218	ITGAM/ITGB2/VAMP8	3
BP	GO:0031663	lipopolysaccharide-mediated signaling pathway	4/94	62/18800	0.000261887	0.00182883	0.00118694	CCL5/CD14/LY86/LYN	4
BP	GO:0048015	phosphatidylinositol-mediated signaling	6/94	177/18800	0.000262544	0.00182883	0.00118694	CCL5/CSF1R/HCLS1/HCST/PIK3AP1/PTPN6	6
BP	GO:0006816	calcium ion transport	9/94	424/18800	0.000271521	0.00188332	0.0012223	CCL19/CCL5/CCR1/CORO1A/CXCL12/LCK/LYN/PTPN6/PTPRC	9
BP	GO:0002833	positive regulation of response to biotic stimulus	6/94	180/18800	0.000287359	0.00198472	0.00128812	CCL5/LY86/LYN/MNDA/PYCARD/TYROBP	6
BP	GO:0002407	dendritic cell chemotaxis	3/94	26/18800	0.000289544	0.00199095	0.00129216	CCL19/CCL5/CCR1	3
BP	GO:0002286	T cell activation involved in immune response	5/94	116/18800	0.000290704	0.00199095	0.00129216	CCL19/EOMES/FCER1G/HLA-DMB/HLA-DRA	5
BP	GO:0045619	regulation of lymphocyte differentiation	6/94	181/18800	0.000296028	0.00201052	0.00130486	CCL19/CD2/HLA-DRA/IL7R/PTPN6/PTPRC	6
BP	GO:0048017	inositol lipid-mediated signaling	6/94	181/18800	0.000296028	0.00201052	0.00130486	CCL5/CSF1R/HCLS1/HCST/PIK3AP1/PTPN6	6
BP	GO:0031343	positive regulation of cell killing	4/94	65/18800	0.000314232	0.00211652	0.00137366	HLA-DRA/ITGAM/PTPRC/TYROBP	4
BP	GO:0045576	mast cell activation	4/94	65/18800	0.000314232	0.00211652	0.00137366	LYN/PTPN6/RAC2/VAMP8	4
BP	GO:0010758	regulation of macrophage chemotaxis	3/94	27/18800	0.00032456	0.00216817	0.00140717	C3AR1/CCL5/CSF1R	3
BP	GO:0071624	positive regulation of granulocyte chemotaxis	3/94	27/18800	0.00032456	0.00216817	0.00140717	C3AR1/CCL19/RAC2	3
BP	GO:0050730	regulation of peptidyl-tyrosine phosphorylation	7/94	261/18800	0.000335952	0.00223511	0.00145062	CCL5/CSF1R/HCLS1/ITGB2/LYN/PTPN6/PTPRC	7
BP	GO:0002704	negative regulation of leukocyte mediated immunity	4/94	67/18800	0.000353044	0.0023298	0.00151208	CX3CR1/IL7R/PTPN6/PTPRC	4
BP	GO:0042531	positive regulation of tyrosine phosphorylation of STAT protein	4/94	67/18800	0.000353044	0.0023298	0.00151208	CCL5/CSF1R/HCLS1/LYN	4
BP	GO:0031342	negative regulation of cell killing	3/94	28/18800	0.000362193	0.00237099	0.00153881	CX3CR1/IL7R/PTPRC	3
BP	GO:0032703	negative regulation of interleukin-2 production	3/94	28/18800	0.000362193	0.00237099	0.00153881	LAPTM5/PTPRC/VSIG4	3
BP	GO:0002831	regulation of response to biotic stimulus	8/94	351/18800	0.000375982	0.0024514	0.001591	CCL5/LY86/LYN/MNDA/PTPN6/PYCARD/TYROBP/VSIG4	8
BP	GO:0032956	regulation of actin cytoskeleton organization	8/94	352/18800	0.000383167	0.00248151	0.00161054	CORO1A/COTL1/CSF1R/CXCL12/GMFG/HCLS1/PYCARD/RAC2	8
BP	GO:0060401	cytosolic calcium ion transport	6/94	190/18800	0.000383645	0.00248151	0.00161054	CCL19/CORO1A/LCK/LYN/PTPN6/PTPRC	6
BP	GO:0046635	positive regulation of alpha-beta T cell activation	4/94	69/18800	0.000395171	0.00254596	0.00165237	CCL19/HLA-DRA/PTPRC/RASAL3	4
BP	GO:0007015	actin filament organization	9/94	450/18800	0.000419307	0.00269083	0.00174639	CORO1A/COTL1/CXCL12/GMFG/HCLS1/MARCKS/MYO1F/PYCARD/RAC2	9
BP	GO:0001894	tissue homeostasis	7/94	272/18800	0.000430477	0.00275167	0.00178588	CORO1A/CSF1R/CTSK/IGKC/LIPA/LYZ/SPP1	7
BP	GO:0038094	Fc-gamma receptor signaling pathway	3/94	30/18800	0.000445635	0.00283744	0.00184154	FCER1G/LYN/PTPRC	3
BP	GO:0006801	superoxide metabolic process	4/94	72/18800	0.000464929	0.00294877	0.0019138	ITGAM/ITGB2/NCF2/TYROBP	4
BP	GO:0045123	cellular extravasation	4/94	73/18800	0.000490012	0.00309386	0.00200796	CX3CR1/CXCL12/IL1R1/LYVE1	4
BP	GO:2000406	positive regulation of T cell migration	3/94	31/18800	0.0004916	0.00309386	0.00200796	CCL5/CXCL12/PYCARD	3
BP	GO:0043304	regulation of mast cell degranulation	3/94	32/18800	0.000540497	0.0033885	0.00219919	LYN/RAC2/VAMP8	3
BP	GO:0018108	peptidyl-tyrosine phosphorylation	8/94	373/18800	0.000561909	0.00350924	0.00227755	CCL5/CSF1R/HCLS1/ITGB2/LCK/LYN/PTPN6/PTPRC	8
BP	GO:0002292	T cell differentiation involved in immune response	4/94	76/18800	0.000571041	0.00355266	0.00230573	CCL19/EOMES/FCER1G/HLA-DRA	4
BP	GO:0018212	peptidyl-tyrosine modification	8/94	376/18800	0.000592208	0.00363013	0.00235601	CCL5/CSF1R/HCLS1/ITGB2/LCK/LYN/PTPN6/PTPRC	8
BP	GO:0002431	Fc receptor mediated stimulatory signaling pathway	3/94	33/18800	0.000592401	0.00363013	0.00235601	FCER1G/LYN/PTPRC	3
BP	GO:0036336	dendritic cell migration	3/94	33/18800	0.000592401	0.00363013	0.00235601	CCL19/CCL5/CCR1	3
BP	GO:0090022	regulation of neutrophil chemotaxis	3/94	33/18800	0.000592401	0.00363013	0.00235601	C3AR1/CCL19/RAC2	3
BP	GO:0033077	T cell differentiation in thymus	4/94	78/18800	0.000630077	0.00384654	0.00249646	CD3D/IL7R/MAFB/PTPRC	4
BP	GO:0033238	regulation of cellular amine metabolic process	3/94	34/18800	0.000647386	0.00392282	0.00254597	ITGAM/ITGB2/SLC7A7	3
BP	GO:0090322	regulation of superoxide metabolic process	3/94	34/18800	0.000647386	0.00392282	0.00254597	ITGAM/ITGB2/TYROBP	3
BP	GO:0045089	positive regulation of innate immune response	5/94	140/18800	0.000687925	0.0041377	0.00268543	CCL5/LYN/MNDA/PYCARD/TYROBP	5
BP	GO:1903305	regulation of regulated secretory pathway	5/94	140/18800	0.000687925	0.0041377	0.00268543	ITGAM/ITGB2/LYN/RAC2/VAMP8	5
BP	GO:0030183	B cell differentiation	5/94	142/18800	0.000733483	0.0043955	0.00285275	BLNK/IRF8/PTPN6/PTPRC/TNFSF13B	5
BP	GO:0030851	granulocyte differentiation	3/94	36/18800	0.000766885	0.00457884	0.00297174	C1QC/EVI2B/HCLS1	3
BP	GO:0014065	phosphatidylinositol 3-kinase signaling	5/94	144/18800	0.000781261	0.00464765	0.00301639	CCL5/HCLS1/HCST/PIK3AP1/PTPN6	5
BP	GO:0032970	regulation of actin filament-based process	8/94	393/18800	0.0007899	0.00468195	0.00303866	CORO1A/COTL1/CSF1R/CXCL12/GMFG/HCLS1/PYCARD/RAC2	8
BP	GO:0042509	regulation of tyrosine phosphorylation of STAT protein	4/94	83/18800	0.000796423	0.00470351	0.00305265	CCL5/CSF1R/HCLS1/LYN	4
BP	GO:0050729	positive regulation of inflammatory response	5/94	145/18800	0.000806004	0.00474291	0.00307822	CASP1/CTSC/NKG7/PYCARD/VAMP8	5
BP	GO:0070374	positive regulation of ERK1 and ERK2 cascade	6/94	220/18800	0.000829443	0.00484076	0.00314173	CCL19/CCL5/CCR1/CSF1R/PTPRC/PYCARD	6
BP	GO:0045730	respiratory burst	3/94	37/18800	0.000831542	0.00484076	0.00314173	CD52/NCF2/RAC2	3
BP	GO:2000403	positive regulation of lymphocyte migration	3/94	37/18800	0.000831542	0.00484076	0.00314173	CCL5/CXCL12/PYCARD	3
BP	GO:0048246	macrophage chemotaxis	3/94	38/18800	0.000899562	0.0052181	0.00338663	C3AR1/CCL5/CSF1R	3
BP	GO:0007260	tyrosine phosphorylation of STAT protein	4/94	87/18800	0.000950149	0.00545332	0.00353929	CCL5/CSF1R/HCLS1/LYN	4
BP	GO:0050829	defense response to Gram-negative bacterium	4/94	87/18800	0.000950149	0.00545332	0.00353929	LYZ/MPEG1/PYCARD/RNASE6	4
BP	GO:1901216	positive regulation of neuron death	4/94	87/18800	0.000950149	0.00545332	0.00353929	C1QA/ITGAM/ITGB2/TYROBP	4
BP	GO:0008360	regulation of cell shape	5/94	151/18800	0.000966953	0.00549566	0.00356677	CORO1A/CSF1R/ITGB2/LST1/RAC2	5
BP	GO:0045580	regulation of T cell differentiation	5/94	151/18800	0.000966953	0.00549566	0.00356677	CCL19/CD2/HLA-DRA/IL7R/PTPRC	5
BP	GO:0002691	regulation of cellular extravasation	3/94	39/18800	0.000971012	0.00549566	0.00356677	CXCL12/IL1R1/LYVE1	3
BP	GO:0097242	amyloid-beta clearance	3/94	39/18800	0.000971012	0.00549566	0.00356677	ITGAM/ITGB2/MSR1	3
BP	GO:1901214	regulation of neuron death	7/94	313/18800	0.000985153	0.0055564	0.00360619	C1QA/CCL5/CORO1A/CX3CR1/ITGAM/ITGB2/TYROBP	7
BP	GO:0002709	regulation of T cell mediated immunity	4/94	88/18800	0.00099162	0.00557359	0.00361734	HLA-DRA/IL1R1/IL7R/PTPRC	4
BP	GO:0071356	cellular response to tumor necrosis factor	6/94	229/18800	0.00102068	0.00571719	0.00371054	CASP1/CCL19/CCL5/LAPTM5/PYCARD/TNFSF13B	6
BP	GO:0001914	regulation of T cell mediated cytotoxicity	3/94	40/18800	0.00104596	0.00583875	0.00378944	HLA-DRA/IL7R/PTPRC	3
BP	GO:0001915	negative regulation of T cell mediated cytotoxicity	2/94	10/18800	0.0010844	0.00599179	0.00388876	IL7R/PTPRC	2
BP	GO:0043320	natural killer cell degranulation	2/94	10/18800	0.0010844	0.00599179	0.00388876	CORO1A/NKG7	2
BP	GO:0060368	regulation of Fc receptor mediated stimulatory signaling pathway	2/94	10/18800	0.0010844	0.00599179	0.00388876	LYN/PTPRC	2
BP	GO:0060249	anatomical structure homeostasis	7/94	319/18800	0.00109975	0.00605607	0.00393048	CORO1A/CSF1R/CTSK/IGKC/LIPA/LYZ/SPP1	7
BP	GO:0008064	regulation of actin polymerization or depolymerization	5/94	158/18800	0.00118365	0.00649611	0.00421608	CORO1A/COTL1/CXCL12/HCLS1/PYCARD	5
BP	GO:0032735	positive regulation of interleukin-12 production	3/94	42/18800	0.0012066	0.00655588	0.00425487	CCL19/IRF8/LAPTM5	3
BP	GO:0034142	toll-like receptor 4 signaling pathway	3/94	42/18800	0.0012066	0.00655588	0.00425487	CD14/LYN/PIK3AP1	3
BP	GO:2000249	regulation of actin cytoskeleton reorganization	3/94	42/18800	0.0012066	0.00655588	0.00425487	CSF1R/GMFG/HCLS1	3
BP	GO:0030832	regulation of actin filament length	5/94	159/18800	0.00121731	0.00659209	0.00427836	CORO1A/COTL1/CXCL12/HCLS1/PYCARD	5
BP	GO:0045582	positive regulation of T cell differentiation	4/94	94/18800	0.00126757	0.00684152	0.00444025	CCL19/HLA-DRA/IL7R/PTPRC	4
BP	GO:0030316	osteoclast differentiation	4/94	96/18800	0.00137038	0.00737201	0.00478455	CCR1/CSF1R/MAFB/TYROBP	4
BP	GO:0050856	regulation of T cell receptor signaling pathway	3/94	44/18800	0.001382	0.00738577	0.00479348	LAPTM5/LCK/PTPN6	3
BP	GO:2000404	regulation of T cell migration	3/94	44/18800	0.001382	0.00738577	0.00479348	CCL5/CXCL12/PYCARD	3
BP	GO:0002920	regulation of humoral immune response	3/94	45/18800	0.00147538	0.00783347	0.00508404	PTPN6/PTPRC/VSIG4	3
BP	GO:0046427	positive regulation of receptor signaling pathway via JAK-STAT	3/94	45/18800	0.00147538	0.00783347	0.00508404	CCL5/IL10RA/IL7R	3
BP	GO:0045639	positive regulation of myeloid cell differentiation	4/94	99/18800	0.00153531	0.0081252	0.00527338	CCR1/EVI2B/HCLS1/TYROBP	4
BP	GO:0043312	neutrophil degranulation	2/94	12/18800	0.00158013	0.00828171	0.00537495	ITGAM/ITGB2	2
BP	GO:0051608	histamine transport	2/94	12/18800	0.00158013	0.00828171	0.00537495	LYN/VAMP8	2
BP	GO:1900272	negative regulation of long-term synaptic potentiation	2/94	12/18800	0.00158013	0.00828171	0.00537495	CX3CR1/TYROBP	2
BP	GO:0051924	regulation of calcium ion transport	6/94	251/18800	0.00163099	0.00852088	0.00553018	CCL5/CCR1/CORO1A/CXCL12/LYN/PTPN6	6
BP	GO:0097028	dendritic cell differentiation	3/94	47/18800	0.00167382	0.00871668	0.00565725	CCL19/IRF8/LYN	3
BP	GO:0006910	phagocytosis, recognition	4/94	102/18800	0.0017136	0.00886718	0.00575494	IGKC/IGLC1/IGLL5/TRBC1	4
BP	GO:0032677	regulation of interleukin-8 production	4/94	102/18800	0.0017136	0.00886718	0.00575494	CD14/CD2/PTPRC/PYCARD	4
BP	GO:0032637	interleukin-8 production	4/94	103/18800	0.00177609	0.00914743	0.00593682	CD14/CD2/PTPRC/PYCARD	4
BP	GO:0033628	regulation of cell adhesion mediated by integrin	3/94	48/18800	0.00177898	0.00914743	0.00593682	CCL5/LYN/PTPN6	3
BP	GO:0010950	positive regulation of endopeptidase activity	5/94	174/18800	0.00181186	0.00928718	0.00602752	CASP1/LAPTM5/LCK/LYN/PYCARD	5
BP	GO:1903265	positive regulation of tumor necrosis factor-mediated signaling pathway	2/94	13/18800	0.00186136	0.009511	0.00617278	CASP1/LAPTM5	2
BP	GO:0002762	negative regulation of myeloid leukocyte differentiation	3/94	49/18800	0.00188818	0.00955819	0.00620341	C1QC/LYN/MAFB	3
BP	GO:0030225	macrophage differentiation	3/94	49/18800	0.00188818	0.00955819	0.00620341	C1QC/CSF1R/HCLS1	3
BP	GO:1904894	positive regulation of receptor signaling pathway via STAT	3/94	49/18800	0.00188818	0.00955819	0.00620341	CCL5/IL10RA/IL7R	3
BP	GO:0032535	regulation of cellular component size	7/94	351/18800	0.00189957	0.00955823	0.00620343	CORO1A/COTL1/CXCL12/HCLS1/IL7R/PYCARD/SPP1	7
BP	GO:0046425	regulation of receptor signaling pathway via JAK-STAT	4/94	105/18800	0.00190578	0.00955823	0.00620343	CCL5/IL10RA/IL7R/PTPRC	4
BP	GO:0046634	regulation of alpha-beta T cell activation	4/94	105/18800	0.00190578	0.00955823	0.00620343	CCL19/HLA-DRA/PTPRC/RASAL3	4
BP	GO:0070997	neuron death	7/94	353/18800	0.00196149	0.00980744	0.00636518	C1QA/CCL5/CORO1A/CX3CR1/ITGAM/ITGB2/TYROBP	7
BP	GO:0043303	mast cell degranulation	3/94	50/18800	0.00200148	0.00994638	0.00645535	LYN/RAC2/VAMP8	3
BP	GO:1903307	positive regulation of regulated secretory pathway	3/94	50/18800	0.00200148	0.00994638	0.00645535	ITGAM/ITGB2/VAMP8	3
BP	GO:0033209	tumor necrosis factor-mediated signaling pathway	4/94	107/18800	0.0020419	0.0100857	0.0065458	CASP1/LAPTM5/PYCARD/TNFSF13B	4
BP	GO:0045621	positive regulation of lymphocyte differentiation	4/94	107/18800	0.0020419	0.0100857	0.0065458	CCL19/HLA-DRA/IL7R/PTPRC	4
BP	GO:0050777	negative regulation of immune response	5/94	179/18800	0.0020506	0.0100981	0.00655382	IL7R/LYN/PTPN6/PTPRC/VSIG4	5
BP	GO:0022411	cellular component disassembly	8/94	460/18800	0.00214342	0.0105234	0.00682985	C1QA/C1QB/C1QC/CTSK/CTSS/CX3CR1/ITGAM/VAMP8	8
BP	GO:0045059	positive thymic T cell selection	2/94	14/18800	0.00216452	0.0105319	0.00683534	CD3D/PTPRC	2
BP	GO:0098760	response to interleukin-7	2/94	14/18800	0.00216452	0.0105319	0.00683534	IL7R/LSP1	2
BP	GO:0098761	cellular response to interleukin-7	2/94	14/18800	0.00216452	0.0105319	0.00683534	IL7R/LSP1	2
BP	GO:0002448	mast cell mediated immunity	3/94	52/18800	0.00224057	0.0108372	0.0070335	LYN/RAC2/VAMP8	3
BP	GO:0038093	Fc receptor signaling pathway	3/94	52/18800	0.00224057	0.0108372	0.0070335	FCER1G/LYN/PTPRC	3
BP	GO:0001818	negative regulation of cytokine production	7/94	363/18800	0.00229498	0.0110675	0.00718297	CX3CR1/LAPTM5/PTPN6/PTPRC/PYCARD/TYROBP/VSIG4	7
BP	GO:0071347	cellular response to interleukin-1	4/94	111/18800	0.00233403	0.0112226	0.00728367	CCL19/CCL5/IL1R1/PYCARD	4
BP	GO:0110053	regulation of actin filament organization	6/94	270/18800	0.00235325	0.0112818	0.00732204	CORO1A/COTL1/CXCL12/GMFG/HCLS1/PYCARD	6
BP	GO:0050832	defense response to fungus	3/94	53/18800	0.00236647	0.0113119	0.00734158	COTL1/CX3CR1/GNLY	3
BP	GO:0002468	dendritic cell antigen processing and presentation	2/94	15/18800	0.00248942	0.0118302	0.00767795	CCL19/HLA-DRA	2
BP	GO:1902563	regulation of neutrophil activation	2/94	15/18800	0.00248942	0.0118302	0.00767795	ITGAM/ITGB2	2
BP	GO:0002823	negative regulation of adaptive immune response based on somatic recombination of immune receptors built from immunoglobulin superfamily domains	3/94	54/18800	0.00249667	0.0118302	0.00767795	IL7R/PTPN6/PTPRC	3
BP	GO:0002707	negative regulation of lymphocyte mediated immunity	3/94	55/18800	0.00263122	0.0124316	0.00806828	IL7R/PTPN6/PTPRC	3
BP	GO:0050731	positive regulation of peptidyl-tyrosine phosphorylation	5/94	190/18800	0.00265575	0.0125112	0.00811995	CCL5/CSF1R/HCLS1/LYN/PTPRC	5
BP	GO:1904892	regulation of receptor signaling pathway via STAT	4/94	116/18800	0.00273817	0.0128623	0.00834782	CCL5/IL10RA/IL7R/PTPRC	4
BP	GO:0061756	leukocyte adhesion to vascular endothelial cell	3/94	56/18800	0.00277017	0.0129752	0.00842113	CX3CR1/CXCL12/ITGB2	3
BP	GO:0010952	positive regulation of peptidase activity	5/94	192/18800	0.00277832	0.0129761	0.00842171	CASP1/LAPTM5/LCK/LYN/PYCARD	5
BP	GO:0002708	positive regulation of lymphocyte mediated immunity	4/94	117/18800	0.00282439	0.0131536	0.00853687	HLA-DRA/IL1R1/PTPRC/TNFSF13	4
BP	GO:0002921	negative regulation of humoral immune response	2/94	16/18800	0.00283581	0.0131691	0.00854697	PTPN6/VSIG4	2
BP	GO:0001961	positive regulation of cytokine-mediated signaling pathway	3/94	57/18800	0.00291357	0.0134156	0.00870693	CASP1/IL1R1/LAPTM5	3
BP	GO:0010803	regulation of tumor necrosis factor-mediated signaling pathway	3/94	57/18800	0.00291357	0.0134156	0.00870693	CASP1/LAPTM5/PYCARD	3
BP	GO:0070228	regulation of lymphocyte apoptotic process	3/94	57/18800	0.00291357	0.0134156	0.00870693	CCL5/IL7R/LYN	3
BP	GO:0072676	lymphocyte migration	4/94	119/18800	0.00300237	0.0137855	0.00894703	CCL19/CCL5/CXCL12/PYCARD	4
BP	GO:0002702	positive regulation of production of molecular mediator of immune response	4/94	120/18800	0.00309418	0.0141672	0.0091947	IL1R1/LAPTM5/PTPRC/TNFSF13	4
BP	GO:0034134	toll-like receptor 2 signaling pathway	2/94	17/18800	0.00320349	0.0145923	0.00947064	LYN/PIK3AP1	2
BP	GO:0002711	positive regulation of T cell mediated immunity	3/94	59/18800	0.00321389	0.0145923	0.00947064	HLA-DRA/IL1R1/PTPRC	3
BP	GO:0002820	negative regulation of adaptive immune response	3/94	59/18800	0.00321389	0.0145923	0.00947064	IL7R/PTPN6/PTPRC	3
BP	GO:0008154	actin polymerization or depolymerization	5/94	199/18800	0.00323974	0.0146688	0.0095203	CORO1A/COTL1/CXCL12/HCLS1/PYCARD	5
BP	GO:0002224	toll-like receptor signaling pathway	4/94	123/18800	0.00338107	0.0152663	0.00990807	CD14/CTSS/LYN/PIK3AP1	4
BP	GO:0009615	response to virus	7/94	392/18800	0.00351356	0.0158207	0.0102679	CCL19/CCL5/CXCL12/PTPRC/PYCARD/RNASE6/VAMP8	7
BP	GO:0043280	positive regulation of cysteine-type endopeptidase activity involved in apoptotic process	4/94	125/18800	0.00358208	0.0159959	0.0103816	CASP1/LAPTM5/LCK/PYCARD	4
BP	GO:0002281	macrophage activation involved in immune response	2/94	18/18800	0.00359223	0.0159959	0.0103816	CX3CR1/TYROBP	2
BP	GO:0002693	positive regulation of cellular extravasation	2/94	18/18800	0.00359223	0.0159959	0.0103816	IL1R1/LYVE1	2
BP	GO:0002923	regulation of humoral immune response mediated by circulating immunoglobulin	2/94	18/18800	0.00359223	0.0159959	0.0103816	PTPN6/PTPRC	2
BP	GO:0017157	regulation of exocytosis	5/94	204/18800	0.00360153	0.0159959	0.0103816	ITGAM/ITGB2/LYN/RAC2/VAMP8	5
BP	GO:0002712	regulation of B cell mediated immunity	3/94	62/18800	0.00369884	0.016251	0.0105471	PTPN6/PTPRC/TNFSF13	3
BP	GO:0002889	regulation of immunoglobulin mediated immune response	3/94	62/18800	0.00369884	0.016251	0.0105471	PTPN6/PTPRC/TNFSF13	3
BP	GO:0032757	positive regulation of interleukin-8 production	3/94	62/18800	0.00369884	0.016251	0.0105471	CD14/CD2/PYCARD	3
BP	GO:0043030	regulation of macrophage activation	3/94	62/18800	0.00369884	0.016251	0.0105471	CTSC/PTPRC/VSIG4	3
BP	GO:0032615	interleukin-12 production	3/94	63/18800	0.00386986	0.0167317	0.0108592	CCL19/IRF8/LAPTM5	3
BP	GO:0032623	interleukin-2 production	3/94	63/18800	0.00386986	0.0167317	0.0108592	LAPTM5/PTPRC/VSIG4	3
BP	GO:0032655	regulation of interleukin-12 production	3/94	63/18800	0.00386986	0.0167317	0.0108592	CCL19/IRF8/LAPTM5	3
BP	GO:0032663	regulation of interleukin-2 production	3/94	63/18800	0.00386986	0.0167317	0.0108592	LAPTM5/PTPRC/VSIG4	3
BP	GO:0045453	bone resorption	3/94	63/18800	0.00386986	0.0167317	0.0108592	CSF1R/CTSK/SPP1	3
BP	GO:2000401	regulation of lymphocyte migration	3/94	63/18800	0.00386986	0.0167317	0.0108592	CCL5/CXCL12/PYCARD	3
BP	GO:0043031	negative regulation of macrophage activation	2/94	19/18800	0.00400182	0.0172565	0.0111998	PTPRC/VSIG4	2
BP	GO:0009620	response to fungus	3/94	64/18800	0.00404562	0.0172627	0.0112038	COTL1/CX3CR1/GNLY	3
BP	GO:0045670	regulation of osteoclast differentiation	3/94	64/18800	0.00404562	0.0172627	0.0112038	CCR1/MAFB/TYROBP	3
BP	GO:0050918	positive chemotaxis	3/94	64/18800	0.00404562	0.0172627	0.0112038	CCL5/CORO1A/CXCL12	3
BP	GO:0060760	positive regulation of response to cytokine stimulus	3/94	64/18800	0.00404562	0.0172627	0.0112038	CASP1/IL1R1/LAPTM5	3
BP	GO:0030168	platelet activation	4/94	130/18800	0.00411985	0.0175336	0.0113796	FCER1G/LCK/LYN/PTPN6	4
BP	GO:0002260	lymphocyte homeostasis	3/94	65/18800	0.00422617	0.0179392	0.0116428	CORO1A/LYN/TNFSF13B	3
BP	GO:0002577	regulation of antigen processing and presentation	2/94	20/18800	0.00443205	0.0185713	0.0120531	CCL19/PYCARD	2
BP	GO:0042053	regulation of dopamine metabolic process	2/94	20/18800	0.00443205	0.0185713	0.0120531	ITGAM/ITGB2	2
BP	GO:0042069	regulation of catecholamine metabolic process	2/94	20/18800	0.00443205	0.0185713	0.0120531	ITGAM/ITGB2	2
BP	GO:0070233	negative regulation of T cell apoptotic process	2/94	20/18800	0.00443205	0.0185713	0.0120531	CCL5/IL7R	2
BP	GO:1903978	regulation of microglial cell activation	2/94	20/18800	0.00443205	0.0185713	0.0120531	CTSC/PTPRC	2
BP	GO:2001235	positive regulation of apoptotic signaling pathway	4/94	134/18800	0.00458751	0.0190863	0.0123873	CTSC/LCK/PTPRC/PYCARD	4
BP	GO:0051851	modulation by host of symbiont process	3/94	67/18800	0.00460179	0.0190863	0.0123873	CCL5/CSF1R/CX3CR1	3
BP	GO:0072678	T cell migration	3/94	67/18800	0.00460179	0.0190863	0.0123873	CCL5/CXCL12/PYCARD	3
BP	GO:1901224	positive regulation of NIK/NF-kappaB signaling	3/94	67/18800	0.00460179	0.0190863	0.0123873	CCL19/CD14/LAPTM5	3
BP	GO:0002287	alpha-beta T cell activation involved in immune response	3/94	68/18800	0.00479694	0.0197949	0.0128472	CCL19/EOMES/HLA-DRA	3
BP	GO:0002293	alpha-beta T cell differentiation involved in immune response	3/94	68/18800	0.00479694	0.0197949	0.0128472	CCL19/EOMES/HLA-DRA	3
BP	GO:0033630	positive regulation of cell adhesion mediated by integrin	2/94	21/18800	0.00488271	0.0200474	0.0130111	CCL5/PTPN6	2
BP	GO:0071404	cellular response to low-density lipoprotein particle stimulus	2/94	21/18800	0.00488271	0.0200474	0.0130111	FCER1G/ITGB2	2
BP	GO:0070588	calcium ion transmembrane transport	6/94	314/18800	0.00492873	0.0201855	0.0131007	CCL19/CORO1A/LCK/LYN/PTPN6/PTPRC	6
BP	GO:0030833	regulation of actin filament polymerization	4/94	139/18800	0.00522077	0.021328	0.0138422	CORO1A/COTL1/HCLS1/PYCARD	4
BP	GO:0002223	stimulatory C-type lectin receptor signaling pathway	2/94	22/18800	0.00535358	0.0217073	0.0140884	LYN/TYROBP	2
BP	GO:0045061	thymic T cell selection	2/94	22/18800	0.00535358	0.0217073	0.0140884	CD3D/PTPRC	2
BP	GO:0070269	pyroptosis	2/94	22/18800	0.00535358	0.0217073	0.0140884	CASP1/GZMA	2
BP	GO:0050766	positive regulation of phagocytosis	3/94	71/18800	0.00541212	0.021836	0.0141719	FCER1G/PTPRC/PYCARD	3
BP	GO:2000379	positive regulation of reactive oxygen species metabolic process	3/94	71/18800	0.00541212	0.021836	0.0141719	ITGAM/ITGB2/TYROBP	3
BP	GO:0070555	response to interleukin-1	4/94	141/18800	0.00548967	0.0220942	0.0143395	CCL19/CCL5/IL1R1/PYCARD	4
BP	GO:0042267	natural killer cell mediated cytotoxicity	3/94	72/18800	0.00562722	0.022592	0.0146626	CORO1A/NKG7/PTPN6	3
BP	GO:0008037	cell recognition	5/94	228/18800	0.00575133	0.0230336	0.0149491	CCL19/IGKC/IGLC1/IGLL5/TRBC1	5
BP	GO:2001056	positive regulation of cysteine-type endopeptidase activity	4/94	143/18800	0.00576769	0.0230425	0.0149549	CASP1/LAPTM5/LCK/PYCARD	4
BP	GO:0046641	positive regulation of alpha-beta T cell proliferation	2/94	23/18800	0.00584446	0.0231787	0.0150434	PTPRC/RASAL3	2
BP	GO:1990840	response to lectin	2/94	23/18800	0.00584446	0.0231787	0.0150434	LYN/TYROBP	2
BP	GO:1990858	cellular response to lectin	2/94	23/18800	0.00584446	0.0231787	0.0150434	LYN/TYROBP	2
BP	GO:1903038	negative regulation of leukocyte cell-cell adhesion	4/94	144/18800	0.00591016	0.0233824	0.0151755	CXCL12/LAPTM5/PTPN6/VSIG4	4
BP	GO:0072593	reactive oxygen species metabolic process	5/94	231/18800	0.00607221	0.0239092	0.0155175	ITGAM/ITGB2/NCF2/RAC2/TYROBP	5
BP	GO:0061515	myeloid cell development	3/94	74/18800	0.00607265	0.0239092	0.0155175	EVI2B/PTPN6/TYROBP	3
BP	GO:0002228	natural killer cell mediated immunity	3/94	75/18800	0.00630305	0.024664	0.0160073	CORO1A/NKG7/PTPN6	3
BP	GO:0070227	lymphocyte apoptotic process	3/94	75/18800	0.00630305	0.024664	0.0160073	CCL5/IL7R/LYN	3
BP	GO:2000377	regulation of reactive oxygen species metabolic process	4/94	147/18800	0.00635161	0.024664	0.0160073	ITGAM/ITGB2/RAC2/TYROBP	4
BP	GO:0038095	Fc-epsilon receptor signaling pathway	2/94	24/18800	0.00635513	0.024664	0.0160073	FCER1G/LYN	2
BP	GO:0045649	regulation of macrophage differentiation	2/94	24/18800	0.00635513	0.024664	0.0160073	C1QC/HCLS1	2
BP	GO:0045672	positive regulation of osteoclast differentiation	2/94	24/18800	0.00635513	0.024664	0.0160073	CCR1/TYROBP	2
BP	GO:0006919	activation of cysteine-type endopeptidase activity involved in apoptotic process	3/94	77/18800	0.00677937	0.0261857	0.0169949	LAPTM5/LCK/PYCARD	3
BP	GO:0070373	negative regulation of ERK1 and ERK2 cascade	3/94	77/18800	0.00677937	0.0261857	0.0169949	LYN/PTPRC/TBC1D10C	3
BP	GO:0031579	membrane raft organization	2/94	25/18800	0.0068854	0.0264698	0.0171793	CD2/PTPRC	2
BP	GO:0050860	negative regulation of T cell receptor signaling pathway	2/94	25/18800	0.0068854	0.0264698	0.0171793	LAPTM5/PTPN6	2
BP	GO:1903533	regulation of protein targeting	3/94	78/18800	0.00702534	0.0269442	0.0174872	ITGAM/ITGB2/RAC2	3
BP	GO:0032418	lysosome localization	3/94	79/18800	0.00727656	0.027777	0.0180277	LYN/RAC2/VAMP8	3
BP	GO:1990849	vacuolar localization	3/94	79/18800	0.00727656	0.027777	0.0180277	LYN/RAC2/VAMP8	3
BP	GO:0002433	immune response-regulating cell surface receptor signaling pathway involved in phagocytosis	2/94	26/18800	0.00743505	0.0281186	0.0182494	LYN/PTPRC	2
BP	GO:0038096	Fc-gamma receptor signaling pathway involved in phagocytosis	2/94	26/18800	0.00743505	0.0281186	0.0182494	LYN/PTPRC	2
BP	GO:0042832	defense response to protozoan	2/94	26/18800	0.00743505	0.0281186	0.0182494	IRF8/NKG7	2
BP	GO:0050857	positive regulation of antigen receptor-mediated signaling pathway	2/94	26/18800	0.00743505	0.0281186	0.0182494	LCK/PTPRC	2
BP	GO:0051279	regulation of release of sequestered calcium ion into cytosol	3/94	80/18800	0.00753305	0.0284233	0.0184472	CORO1A/LYN/PTPN6	3
BP	GO:0090316	positive regulation of intracellular protein transport	4/94	156/18800	0.0078061	0.0293855	0.0190717	HCLS1/ITGAM/ITGB2/RAC2	4
BP	GO:0001562	response to protozoan	2/94	27/18800	0.00800389	0.0298543	0.0193759	IRF8/NKG7	2
BP	GO:0002220	innate immune response activating cell surface receptor signaling pathway	2/94	27/18800	0.00800389	0.0298543	0.0193759	LYN/TYROBP	2
BP	GO:0002710	negative regulation of T cell mediated immunity	2/94	27/18800	0.00800389	0.0298543	0.0193759	IL7R/PTPRC	2
BP	GO:2000108	positive regulation of leukocyte apoptotic process	2/94	27/18800	0.00800389	0.0298543	0.0193759	CCL5/LYN	2
BP	GO:0045921	positive regulation of exocytosis	3/94	83/18800	0.0083344	0.0309455	0.0200841	ITGAM/ITGB2/VAMP8	3
BP	GO:0048678	response to axon injury	3/94	83/18800	0.0083344	0.0309455	0.0200841	LYN/SPP1/TYROBP	3
BP	GO:0002758	innate immune response-activating signal transduction	2/94	28/18800	0.00859171	0.0316128	0.0205172	LYN/TYROBP	2
BP	GO:0045830	positive regulation of isotype switching	2/94	28/18800	0.00859171	0.0316128	0.0205172	PTPRC/TNFSF13	2
BP	GO:0048873	homeostasis of number of cells within a tissue	2/94	28/18800	0.00859171	0.0316128	0.0205172	CORO1A/LIPA	2
BP	GO:0090314	positive regulation of protein targeting to membrane	2/94	28/18800	0.00859171	0.0316128	0.0205172	ITGAM/ITGB2	2
BP	GO:0002312	B cell activation involved in immune response	3/94	86/18800	0.00918408	0.0336172	0.0218181	IRF8/PTPRC/TNFSF13	3
BP	GO:0001773	myeloid dendritic cell activation	2/94	29/18800	0.00919832	0.0336172	0.0218181	CD2/PYCARD	2
BP	GO:0002825	regulation of T-helper 1 type immune response	2/94	29/18800	0.00919832	0.0336172	0.0218181	CCL19/IL1R1	2
BP	GO:0046849	bone remodeling	3/94	88/18800	0.00977768	0.0356546	0.0231404	CSF1R/CTSK/SPP1	3
BP	GO:0001916	positive regulation of T cell mediated cytotoxicity	2/94	30/18800	0.00982351	0.0357418	0.023197	HLA-DRA/PTPRC	2
BP	GO:0002700	regulation of production of molecular mediator of immune response	4/94	167/18800	0.00986179	0.035794	0.0232308	IL1R1/LAPTM5/PTPRC/TNFSF13	4
BP	GO:0043087	regulation of GTPase activity	6/94	364/18800	0.00988178	0.035794	0.0232308	ARHGAP9/CCL19/CCL5/PYCARD/RASAL3/TBC1D10C	6
BP	GO:0001776	leukocyte homeostasis	3/94	89/18800	0.0100827	0.0364407	0.0236506	CORO1A/LYN/TNFSF13B	3
BP	GO:0030041	actin filament polymerization	4/94	169/18800	0.0102698	0.0370348	0.0240362	CORO1A/COTL1/HCLS1/PYCARD	4
BP	GO:0061097	regulation of protein tyrosine kinase activity	3/94	90/18800	0.0103932	0.0373971	0.0242713	CCL5/CSF1R/PTPRC	3
BP	GO:0001782	B cell homeostasis	2/94	31/18800	0.0104671	0.0374975	0.0243364	LYN/TNFSF13B	2
BP	GO:0021772	olfactory bulb development	2/94	31/18800	0.0104671	0.0374975	0.0243364	CSF1R/EOMES	2
BP	GO:0045862	positive regulation of proteolysis	6/94	369/18800	0.0105212	0.0376087	0.0244086	CASP1/CTSC/LAPTM5/LCK/LYN/PYCARD	6
BP	GO:2001233	regulation of apoptotic signaling pathway	6/94	370/18800	0.0106525	0.0379948	0.0246592	CTSC/CX3CR1/CXCL12/LCK/PTPRC/PYCARD	6
BP	GO:0045638	negative regulation of myeloid cell differentiation	3/94	91/18800	0.0107092	0.0381134	0.0247362	C1QC/LYN/MAFB	3
BP	GO:0071900	regulation of protein serine/threonine kinase activity	6/94	372/18800	0.0109187	0.0387745	0.0251653	CCL19/CSF1R/LYN/PTPN6/PTPRC/PYCARD	6
BP	GO:0090066	regulation of anatomical structure size	7/94	487/18800	0.0110881	0.0391794	0.025428	CORO1A/COTL1/CXCL12/HCLS1/IL7R/PYCARD/SPP1	7
BP	GO:0002323	natural killer cell activation involved in immune response	2/94	32/18800	0.0111289	0.0391794	0.025428	CORO1A/NKG7	2
BP	GO:0043372	positive regulation of CD4-positive, alpha-beta T cell differentiation	2/94	32/18800	0.0111289	0.0391794	0.025428	CCL19/HLA-DRA	2
BP	GO:0071353	cellular response to interleukin-4	2/94	32/18800	0.0111289	0.0391794	0.025428	CORO1A/MRC1	2
BP	GO:0048771	tissue remodeling	4/94	174/18800	0.0113373	0.0398133	0.0258395	CSF1R/CTSK/LIPA/SPP1	4
BP	GO:0034109	homotypic cell-cell adhesion	3/94	93/18800	0.0113578	0.0398133	0.0258395	CCL5/LYN/PTPN6	3
BP	GO:1902903	regulation of supramolecular fiber organization	6/94	376/18800	0.0114652	0.0401036	0.0260278	CORO1A/COTL1/CXCL12/GMFG/HCLS1/PYCARD	6
BP	GO:0043410	positive regulation of MAPK cascade	7/94	491/18800	0.0115596	0.0403471	0.0261858	CCL19/CCL5/CCR1/CSF1R/LAPTM5/PTPRC/PYCARD	7
BP	GO:0002221	pattern recognition receptor signaling pathway	4/94	176/18800	0.0117835	0.0406078	0.026355	CD14/CTSS/LYN/PIK3AP1	4
BP	GO:0021988	olfactory lobe development	2/94	33/18800	0.0118086	0.0406078	0.026355	CSF1R/EOMES	2
BP	GO:0043552	positive regulation of phosphatidylinositol 3-kinase activity	2/94	33/18800	0.0118086	0.0406078	0.026355	CCL19/LYN	2
BP	GO:0050858	negative regulation of antigen receptor-mediated signaling pathway	2/94	33/18800	0.0118086	0.0406078	0.026355	LAPTM5/PTPN6	2
BP	GO:0050901	leukocyte tethering or rolling	2/94	33/18800	0.0118086	0.0406078	0.026355	CX3CR1/CXCL12	2
BP	GO:0055094	response to lipoprotein particle	2/94	33/18800	0.0118086	0.0406078	0.026355	FCER1G/ITGB2	2
BP	GO:0070229	negative regulation of lymphocyte apoptotic process	2/94	33/18800	0.0118086	0.0406078	0.026355	CCL5/IL7R	2
BP	GO:0043270	positive regulation of ion transport	5/94	273/18800	0.0119778	0.0411028	0.0266763	CCL5/CCR1/CTSS/CXCL12/VAMP8	5
BP	GO:1903532	positive regulation of secretion by cell	5/94	274/18800	0.0121534	0.0416176	0.0270105	CXCL12/ITGAM/ITGB2/SPP1/VAMP8	5
BP	GO:0043409	negative regulation of MAPK cascade	4/94	179/18800	0.0124738	0.0423807	0.0275057	LYN/PTPN6/PTPRC/TBC1D10C	4
BP	GO:0051125	regulation of actin nucleation	2/94	34/18800	0.0125062	0.0423807	0.0275057	CORO1A/GMFG	2
BP	GO:0070232	regulation of T cell apoptotic process	2/94	34/18800	0.0125062	0.0423807	0.0275057	CCL5/IL7R	2
BP	GO:0070670	response to interleukin-4	2/94	34/18800	0.0125062	0.0423807	0.0275057	CORO1A/MRC1	2
BP	GO:0090313	regulation of protein targeting to membrane	2/94	34/18800	0.0125062	0.0423807	0.0275057	ITGAM/ITGB2	2
BP	GO:0002532	production of molecular mediator involved in inflammatory response	3/94	97/18800	0.0127219	0.0430222	0.0279221	LYN/PYCARD/VAMP8	3
BP	GO:0032479	regulation of type I interferon production	3/94	98/18800	0.0130769	0.0440401	0.0285827	CD14/IRF8/PYCARD	3
BP	GO:0032606	type I interferon production	3/94	98/18800	0.0130769	0.0440401	0.0285827	CD14/IRF8/PYCARD	3
BP	GO:0002446	neutrophil mediated immunity	2/94	35/18800	0.0132214	0.0442523	0.0287204	ITGAM/ITGB2	2
BP	GO:0034110	regulation of homotypic cell-cell adhesion	2/94	35/18800	0.0132214	0.0442523	0.0287204	CCL5/LYN	2
BP	GO:0098751	bone cell development	2/94	35/18800	0.0132214	0.0442523	0.0287204	PTPN6/TYROBP	2
BP	GO:0043405	regulation of MAP kinase activity	4/94	183/18800	0.0134339	0.0447921	0.0290707	CCL19/LYN/PTPN6/PTPRC	4
BP	GO:0050764	regulation of phagocytosis	3/94	99/18800	0.0134376	0.0447921	0.0290707	FCER1G/PTPRC/PYCARD	3
BP	GO:0043368	positive T cell selection	2/94	36/18800	0.013954	0.046324	0.0300649	CD3D/PTPRC	2
BP	GO:0071402	cellular response to lipoprotein particle stimulus	2/94	36/18800	0.013954	0.046324	0.0300649	FCER1G/ITGB2	2
BP	GO:0051702	biological process involved in interaction with symbiont	3/94	101/18800	0.0141759	0.0469649	0.030481	CCL5/CSF1R/CX3CR1	3
BP	GO:0044403	biological process involved in symbiotic interaction	5/94	286/18800	0.0143985	0.0476057	0.0308968	CCL5/CSF1R/CX3CR1/MRC1/VAMP8	5
BP	GO:0035710	CD4-positive, alpha-beta T cell activation	3/94	102/18800	0.0145536	0.0479239	0.0311033	CCL19/HLA-DRA/NKG7	3
BP	GO:1902106	negative regulation of leukocyte differentiation	3/94	102/18800	0.0145536	0.0479239	0.0311033	C1QC/LYN/MAFB	3
BP	GO:0046640	regulation of alpha-beta T cell proliferation	2/94	37/18800	0.0147039	0.048224	0.0312981	PTPRC/RASAL3	2
BP	GO:0090218	positive regulation of lipid kinase activity	2/94	37/18800	0.0147039	0.048224	0.0312981	CCL19/LYN	2
BP	GO:0007249	I-kappaB kinase/NF-kappaB signaling	5/94	288/18800	0.0147981	0.0484354	0.0314353	CASP1/CCL19/CX3CR1/PYCARD/S100A4	5
BP	GO:0010522	regulation of calcium ion transport into cytosol	3/94	103/18800	0.0149369	0.0487918	0.0316666	CORO1A/LYN/PTPN6	3
BP	GO:0045191	regulation of isotype switching	2/94	38/18800	0.0154708	0.0503341	0.0326676	PTPRC/TNFSF13	2
BP	GO:0045622	regulation of T-helper cell differentiation	2/94	38/18800	0.0154708	0.0503341	0.0326676	CCL19/HLA-DRA	2
BP	GO:0010959	regulation of metal ion transport	6/94	403/18800	0.0156706	0.0508828	0.0330237	CCL5/CCR1/CORO1A/CXCL12/LYN/PTPN6	6
BP	GO:1903707	negative regulation of hemopoiesis	3/94	106/18800	0.016121	0.0522411	0.0339053	C1QC/LYN/MAFB	3
BP	GO:1904994	regulation of leukocyte adhesion to vascular endothelial cell	2/94	39/18800	0.0162546	0.0524652	0.0340507	CXCL12/ITGB2	2
BP	GO:2000516	positive regulation of CD4-positive, alpha-beta T cell activation	2/94	39/18800	0.0162546	0.0524652	0.0340507	CCL19/HLA-DRA	2
BP	GO:0046633	alpha-beta T cell proliferation	2/94	40/18800	0.017055	0.0549401	0.0356569	PTPRC/RASAL3	2
BP	GO:0051047	positive regulation of secretion	5/94	300/18800	0.0173524	0.0556914	0.0361446	CXCL12/ITGAM/ITGB2/SPP1/VAMP8	5
BP	GO:0009408	response to heat	3/94	109/18800	0.0173566	0.0556914	0.0361446	CD14/CXCL12/LYN	3
BP	GO:0032388	positive regulation of intracellular transport	4/94	198/18800	0.0174487	0.055877	0.036265	HCLS1/ITGAM/ITGB2/RAC2	4
BP	GO:0022408	negative regulation of cell-cell adhesion	4/94	199/18800	0.0177402	0.0565656	0.036712	CXCL12/LAPTM5/PTPN6/VSIG4	4
BP	GO:1901222	regulation of NIK/NF-kappaB signaling	3/94	110/18800	0.0177799	0.0565656	0.036712	CCL19/CD14/LAPTM5	3
BP	GO:0002714	positive regulation of B cell mediated immunity	2/94	41/18800	0.017872	0.0565656	0.036712	PTPRC/TNFSF13	2
BP	GO:0002891	positive regulation of immunoglobulin mediated immune response	2/94	41/18800	0.017872	0.0565656	0.036712	PTPRC/TNFSF13	2
BP	GO:0045124	regulation of bone resorption	2/94	41/18800	0.017872	0.0565656	0.036712	CSF1R/SPP1	2
BP	GO:0150077	regulation of neuroinflammatory response	2/94	41/18800	0.017872	0.0565656	0.036712	CTSC/PTPRC	2
BP	GO:0031532	actin cytoskeleton reorganization	3/94	111/18800	0.0182089	0.0574093	0.0372595	CSF1R/GMFG/HCLS1	3
BP	GO:0046632	alpha-beta T cell differentiation	3/94	111/18800	0.0182089	0.0574093	0.0372595	CCL19/EOMES/HLA-DRA	3
BP	GO:0032271	regulation of protein polymerization	4/94	201/18800	0.0183322	0.0576862	0.0374392	CORO1A/COTL1/HCLS1/PYCARD	4
BP	GO:0007162	negative regulation of cell adhesion	5/94	305/18800	0.0184981	0.0579649	0.0376201	CXCL12/LAPTM5/PTPN6/PTPRC/VSIG4	5
BP	GO:0022604	regulation of cell morphogenesis	5/94	305/18800	0.0184981	0.0579649	0.0376201	CORO1A/CSF1R/ITGB2/LST1/RAC2	5
BP	GO:0050808	synapse organization	6/94	419/18800	0.0186144	0.0579649	0.0376201	C1QA/C1QB/C1QC/CX3CR1/IL10RA/ITGAM	6
BP	GO:0019722	calcium-mediated signaling	4/94	202/18800	0.0186328	0.0579649	0.0376201	CCR1/CX3CR1/PTPRC/TBC1D10C	4
BP	GO:0002347	response to tumor cell	2/94	42/18800	0.0187052	0.0579649	0.0376201	LAPTM5/NKG7	2
BP	GO:0030574	collagen catabolic process	2/94	42/18800	0.0187052	0.0579649	0.0376201	CTSK/CTSS	2
BP	GO:0030890	positive regulation of B cell proliferation	2/94	42/18800	0.0187052	0.0579649	0.0376201	PTPRC/TNFSF13B	2
BP	GO:0042417	dopamine metabolic process	2/94	42/18800	0.0187052	0.0579649	0.0376201	ITGAM/ITGB2	2
BP	GO:0018958	phenol-containing compound metabolic process	3/94	113/18800	0.0190843	0.0590273	0.0383096	CTSK/ITGAM/ITGB2	3
BP	GO:0043281	regulation of cysteine-type endopeptidase activity involved in apoptotic process	4/94	204/18800	0.0192431	0.0594058	0.0385553	CASP1/LAPTM5/LCK/PYCARD	4
BP	GO:0043523	regulation of neuron apoptotic process	4/94	207/18800	0.0201816	0.0621854	0.0403593	CORO1A/CX3CR1/ITGAM/TYROBP	4
BP	GO:0014009	glial cell proliferation	2/94	44/18800	0.02042	0.0627457	0.0407229	CSF1R/LYN	2
BP	GO:0044106	cellular amine metabolic process	3/94	116/18800	0.0204405	0.0627457	0.0407229	ITGAM/ITGB2/SLC7A7	3
BP	GO:0042088	T-helper 1 type immune response	2/94	45/18800	0.0213011	0.0651423	0.0422784	CCL19/IL1R1	2
BP	GO:1900271	regulation of long-term synaptic potentiation	2/94	45/18800	0.0213011	0.0651423	0.0422784	CX3CR1/TYROBP	2
BP	GO:0051897	positive regulation of protein kinase B signaling	3/94	119/18800	0.0218485	0.0665665	0.0432027	CCL19/CX3CR1/HCLS1	3
BP	GO:0051928	positive regulation of calcium ion transport	3/94	119/18800	0.0218485	0.0665665	0.0432027	CCL5/CCR1/CXCL12	3
BP	GO:0006469	negative regulation of protein kinase activity	4/94	213/18800	0.0221425	0.0672538	0.0436488	LYN/PTPN6/PTPRC/PYCARD	4
BP	GO:0031640	killing of cells of another organism	2/94	46/18800	0.0221979	0.0672538	0.0436488	GNLY/LYZ	2
BP	GO:0035987	endodermal cell differentiation	2/94	46/18800	0.0221979	0.0672538	0.0436488	EOMES/ITGB2	2
BP	GO:0009308	amine metabolic process	3/94	121/18800	0.022816	0.0689984	0.044781	ITGAM/ITGB2/SLC7A7	3
BP	GO:0045646	regulation of erythrocyte differentiation	2/94	47/18800	0.0231101	0.0697582	0.0452741	LYN/MAFB	2
BP	GO:0043491	protein kinase B signaling	4/94	216/18800	0.0231652	0.0697952	0.0452982	CCL19/CCL5/CX3CR1/HCLS1	4
BP	GO:0019730	antimicrobial humoral response	3/94	122/18800	0.0233085	0.0699683	0.0454105	GNLY/LYZ/RNASE6	3
BP	GO:0071901	negative regulation of protein serine/threonine kinase activity	3/94	122/18800	0.0233085	0.0699683	0.0454105	LYN/PTPN6/PYCARD	3
BP	GO:0002244	hematopoietic progenitor cell differentiation	3/94	123/18800	0.0238066	0.0713324	0.0462958	CSF1R/PTPN6/PTPRC	3
BP	GO:0010543	regulation of platelet activation	2/94	48/18800	0.0240375	0.071892	0.046659	FCER1G/LYN	2
BP	GO:0030218	erythrocyte differentiation	3/94	124/18800	0.0243106	0.0725756	0.0471026	HCLS1/LYN/MAFB	3
BP	GO:0050868	negative regulation of T cell activation	3/94	125/18800	0.0248203	0.0739618	0.0480023	LAPTM5/PTPN6/VSIG4	3
BP	GO:0007596	blood coagulation	4/94	221/18800	0.0249328	0.0740318	0.0480477	FCER1G/LCK/LYN/PTPN6	4
BP	GO:0045058	T cell selection	2/94	49/18800	0.02498	0.0740318	0.0480477	CD3D/PTPRC	2
BP	GO:0046850	regulation of bone remodeling	2/94	49/18800	0.02498	0.0740318	0.0480477	CSF1R/SPP1	2
BP	GO:0043370	regulation of CD4-positive, alpha-beta T cell differentiation	2/94	50/18800	0.0259375	0.0763142	0.0495291	CCL19/HLA-DRA	2
BP	GO:0046638	positive regulation of alpha-beta T cell differentiation	2/94	50/18800	0.0259375	0.0763142	0.0495291	CCL19/HLA-DRA	2
BP	GO:0070231	T cell apoptotic process	2/94	50/18800	0.0259375	0.0763142	0.0495291	CCL5/IL7R	2
BP	GO:2001238	positive regulation of extrinsic apoptotic signaling pathway	2/94	50/18800	0.0259375	0.0763142	0.0495291	PTPRC/PYCARD	2
BP	GO:0033157	regulation of intracellular protein transport	4/94	224/18800	0.0260316	0.0764531	0.0496192	HCLS1/ITGAM/ITGB2/RAC2	4
CC	GO:0009897	external side of plasma membrane	22/100	455/19594	9.35699e-16	1.44098e-13	7.97806e-14	CCR1/CD14/CD163/CD2/CD3D/CD48/CD8A/CTSK/CX3CR1/CXCL12/FCER1G/IGKC/IGLC1/IGLL5/IL13RA1/IL1R1/IL7R/ITGAM/ITGB2/MSR1/PTPRC/TRBC1	22
CC	GO:0030139	endocytic vesicle	15/100	342/19594	2.07573e-10	1.59831e-08	8.84918e-09	CD163/CD3D/CORO1A/CTSS/GNLY/HLA-DPA1/HLA-DPB1/HLA-DRA/IL7R/LYN/MPEG1/MSR1/NCF2/RAC2/VAMP8	15
CC	GO:0030666	endocytic vesicle membrane	11/100	194/19594	4.43748e-09	2.27791e-07	1.26118e-07	CD163/CD3D/CORO1A/HLA-DPA1/HLA-DPB1/HLA-DRA/IL7R/LYN/MSR1/RAC2/VAMP8	11
CC	GO:0042613	MHC class II protein complex	5/100	17/19594	1.84487e-08	7.10273e-07	3.93248e-07	HLA-DMA/HLA-DMB/HLA-DPA1/HLA-DPB1/HLA-DRA	5
CC	GO:0042611	MHC protein complex	5/100	25/19594	1.53356e-07	4.72336e-06	2.61512e-06	HLA-DMA/HLA-DMB/HLA-DPA1/HLA-DPB1/HLA-DRA	5
CC	GO:0005766	primary lysosome	8/100	155/19594	1.28621e-06	2.82966e-05	1.56666e-05	C3AR1/CTSC/FTL/GLIPR1/LYZ/MNDA/PYCARD/VAMP8	8
CC	GO:0042582	azurophil granule	8/100	155/19594	1.28621e-06	2.82966e-05	1.56666e-05	C3AR1/CTSC/FTL/GLIPR1/LYZ/MNDA/PYCARD/VAMP8	8
CC	GO:0030669	clathrin-coated endocytic vesicle membrane	6/100	72/19594	1.80731e-06	3.36359e-05	1.86227e-05	CD3D/HLA-DPA1/HLA-DPB1/HLA-DRA/IL7R/VAMP8	6
CC	GO:0070820	tertiary granule	8/100	164/19594	1.96573e-06	3.36359e-05	1.86227e-05	CTSS/FCER1G/ITGAM/ITGB2/LYZ/PTPN6/TBC1D10C/VAMP8	8
CC	GO:0005775	vacuolar lumen	8/100	174/19594	3.05787e-06	4.70911e-05	2.60723e-05	CTSC/CTSK/CTSS/FTL/LIPA/LYZ/MNDA/PYCARD	8
CC	GO:0030667	secretory granule membrane	10/100	312/19594	4.43079e-06	6.2031e-05	3.43439e-05	C3AR1/CD14/FCER1G/GLIPR1/ITGAM/ITGB2/PTPRC/TBC1D10C/TYROBP/VAMP8	10
CC	GO:0045121	membrane raft	10/100	326/19594	6.52141e-06	6.4604e-05	3.57684e-05	CD14/CD2/CD48/CD8A/ITGAM/ITGB2/LCK/LYN/MS4A4A/PTPRC	10
CC	GO:0098857	membrane microdomain	10/100	327/19594	6.69896e-06	6.4604e-05	3.57684e-05	CD14/CD2/CD48/CD8A/ITGAM/ITGB2/LCK/LYN/MS4A4A/PTPRC	10
CC	GO:0005765	lysosomal membrane	11/100	404/19594	6.83793e-06	6.4604e-05	3.57684e-05	C3AR1/GLIPR1/HLA-DMA/HLA-DMB/HLA-DPA1/HLA-DPB1/HLA-DRA/LAPTM5/LYN/NKG7/VAMP8	11
CC	GO:0098852	lytic vacuole membrane	11/100	404/19594	6.83793e-06	6.4604e-05	3.57684e-05	C3AR1/GLIPR1/HLA-DMA/HLA-DMB/HLA-DPA1/HLA-DPB1/HLA-DRA/LAPTM5/LYN/NKG7/VAMP8	11
CC	GO:0045335	phagocytic vesicle	7/100	138/19594	6.84604e-06	6.4604e-05	3.57684e-05	CORO1A/CTSS/GNLY/MPEG1/NCF2/RAC2/VAMP8	7
CC	GO:0045334	clathrin-coated endocytic vesicle	6/100	91/19594	7.13161e-06	6.4604e-05	3.57684e-05	CD3D/HLA-DPA1/HLA-DPB1/HLA-DRA/IL7R/VAMP8	6
CC	GO:0005774	vacuolar membrane	11/100	449/19594	1.83411e-05	0.000156918	8.6879e-05	C3AR1/GLIPR1/HLA-DMA/HLA-DMB/HLA-DPA1/HLA-DPB1/HLA-DRA/LAPTM5/LYN/NKG7/VAMP8	11
CC	GO:0030665	clathrin-coated vesicle membrane	6/100	111/19594	2.23163e-05	0.000180879	0.000100145	CD3D/HLA-DPA1/HLA-DPB1/HLA-DRA/IL7R/VAMP8	6
CC	GO:0044194	cytolytic granule	3/100	13/19594	3.55453e-05	0.000273699	0.000151535	GNLY/GZMH/NKG7	3
CC	GO:0034774	secretory granule lumen	9/100	322/19594	4.00872e-05	0.000292699	0.000162055	ARHGAP9/COTL1/CTSC/FTL/GMFG/LYZ/MNDA/PTPN6/PYCARD	9
CC	GO:0060205	cytoplasmic vesicle lumen	9/100	325/19594	4.30777e-05	0.000292699	0.000162055	ARHGAP9/COTL1/CTSC/FTL/GMFG/LYZ/MNDA/PTPN6/PYCARD	9
CC	GO:0031983	vesicle lumen	9/100	327/19594	4.51746e-05	0.000292699	0.000162055	ARHGAP9/COTL1/CTSC/FTL/GMFG/LYZ/MNDA/PTPN6/PYCARD	9
CC	GO:0101002	ficolin-1-rich granule	7/100	185/19594	4.56154e-05	0.000292699	0.000162055	COTL1/CTSS/FCER1G/GMFG/ITGB2/MNDA/TBC1D10C	7
CC	GO:0001772	immunological synapse	4/100	44/19594	7.41214e-05	0.000456588	0.000252793	CORO1A/GZMA/HLA-DRA/LCK	4
CC	GO:0035578	azurophil granule lumen	5/100	91/19594	0.000102859	0.000609242	0.000337311	CTSC/FTL/LYZ/MNDA/PYCARD	5
CC	GO:0042581	specific granule	6/100	160/19594	0.000170889	0.000974702	0.000539651	C3AR1/ITGAM/ITGB2/LYZ/PTPN6/VAMP8	6
CC	GO:0030662	coated vesicle membrane	6/100	176/19594	0.000286048	0.00157326	0.000871048	CD3D/HLA-DPA1/HLA-DPB1/HLA-DRA/IL7R/VAMP8	6
CC	GO:0071556	integral component of lumenal side of endoplasmic reticulum membrane	3/100	29/19594	0.000427985	0.00219699	0.00121638	HLA-DPA1/HLA-DPB1/HLA-DRA	3
CC	GO:0098553	lumenal side of endoplasmic reticulum membrane	3/100	29/19594	0.000427985	0.00219699	0.00121638	HLA-DPA1/HLA-DPB1/HLA-DRA	3
CC	GO:0030136	clathrin-coated vesicle	6/100	192/19594	0.000454911	0.00225988	0.0012512	CD3D/HLA-DPA1/HLA-DPB1/HLA-DRA/IL7R/VAMP8	6
CC	GO:0008305	integrin complex	3/100	31/19594	0.000522608	0.0024767	0.00137124	ITGAM/ITGB2/LYN	3
CC	GO:0070821	tertiary granule membrane	4/100	73/19594	0.000530722	0.0024767	0.00137124	FCER1G/ITGAM/ITGB2/VAMP8	4
CC	GO:0042571	immunoglobulin complex, circulating	4/100	77/19594	0.000649666	0.0029426	0.00162919	IGKC/IGLC1/IGLL5/TRBC1	4
CC	GO:0030135	coated vesicle	7/100	290/19594	0.000716622	0.00315314	0.00174576	CD3D/CTSC/HLA-DPA1/HLA-DPB1/HLA-DRA/IL7R/VAMP8	7
CC	GO:0098576	lumenal side of membrane	3/100	35/19594	0.00074978	0.00320739	0.00177579	HLA-DPA1/HLA-DPB1/HLA-DRA	3
CC	GO:0072562	blood microparticle	5/100	147/19594	0.000943415	0.00392665	0.00217401	C1QB/C1QC/C1S/IGKC/IGLC1	5
CC	GO:0005581	collagen trimer	4/100	86/19594	0.000984387	0.00398936	0.00220874	C1QA/C1QB/C1QC/MSR1	4
CC	GO:0098802	plasma membrane signaling receptor complex	7/100	313/19594	0.00111801	0.00441472	0.00244424	CD3D/CD8A/IL13RA1/ITGAM/ITGB2/LYN/PTPN6	7
CC	GO:0035579	specific granule membrane	4/100	91/19594	0.0012151	0.00467812	0.00259007	C3AR1/ITGAM/ITGB2/VAMP8	4
CC	GO:0030134	COPII-coated ER to Golgi transport vesicle	4/100	94/19594	0.00137036	0.00492935	0.00272917	CTSC/HLA-DPA1/HLA-DPB1/HLA-DRA	4
CC	GO:0098636	protein complex involved in cell adhesion	3/100	43/19594	0.00137261	0.00492935	0.00272917	ITGAM/ITGB2/LYN	3
CC	GO:0042105	alpha-beta T cell receptor complex	2/100	11/19594	0.00137638	0.00492935	0.00272917	CD3D/PTPN6	2
CC	GO:0019814	immunoglobulin complex	5/100	167/19594	0.00166175	0.00581614	0.00322014	IGKC/IGLC1/IGLL5/IGLV1-44/TRBC1	5
CC	GO:0005884	actin filament	4/100	113/19594	0.00268789	0.00899859	0.00498213	CORO1A/COTL1/HCLS1/RAC2	4
CC	GO:0044853	plasma membrane raft	4/100	113/19594	0.00268789	0.00899859	0.00498213	CD8A/ITGAM/ITGB2/MS4A4A	4
CC	GO:1904724	tertiary granule lumen	3/100	55/19594	0.00279175	0.00914744	0.00506454	CTSS/LYZ/PTPN6	3
CC	GO:0098562	cytoplasmic side of membrane	5/100	193/19594	0.00311365	0.00998964	0.00553083	CD2/LCK/LYN/PTPRC/RASAL3	5
CC	GO:0035577	azurophil granule membrane	3/100	58/19594	0.00324745	0.0102063	0.00565078	C3AR1/GLIPR1/VAMP8	3
CC	GO:0005767	secondary lysosome	2/100	17/19594	0.00333617	0.0102754	0.00568905	FTL/NCF2	2
CC	GO:0061702	inflammasome complex	2/100	18/19594	0.00374075	0.0109052	0.00603773	CASP1/PYCARD	2
CC	GO:0101003	ficolin-1-rich granule membrane	3/100	61/19594	0.00374625	0.0109052	0.00603773	FCER1G/ITGB2/TBC1D10C	3
CC	GO:1904813	ficolin-1-rich granule lumen	4/100	124/19594	0.00375308	0.0109052	0.00603773	COTL1/CTSS/GMFG/MNDA	4
CC	GO:0012507	ER to Golgi transport vesicle membrane	3/100	62/19594	0.0039223	0.0111858	0.0061931	HLA-DPA1/HLA-DPB1/HLA-DRA	3
CC	GO:0005938	cell cortex	6/100	310/19594	0.0051392	0.0143898	0.00796699	CORO1A/COTL1/HCLS1/MARCKS/RAC2/RASAL3	6
CC	GO:0062023	collagen-containing extracellular matrix	7/100	429/19594	0.00642115	0.0176582	0.00977656	C1QA/C1QB/C1QC/CTSC/CTSS/CXCL12/S100A4	7
CC	GO:0030670	phagocytic vesicle membrane	3/100	77/19594	0.00718032	0.0193995	0.0107406	CORO1A/RAC2/VAMP8	3
CC	GO:0031902	late endosome membrane	4/100	152/19594	0.00767536	0.0201132	0.0111358	HLA-DMA/HLA-DMB/HLA-DRA/VAMP8	4
CC	GO:0030864	cortical actin cytoskeleton	3/100	79/19594	0.00770569	0.0201132	0.0111358	CORO1A/COTL1/HCLS1	3
CC	GO:0036019	endolysosome	2/100	28/19594	0.0089406	0.0229475	0.0127051	CTSK/CTSS	2
CC	GO:0005802	trans-Golgi network	5/100	260/19594	0.010731	0.0269658	0.0149298	HLA-DPA1/HLA-DPB1/HLA-DRA/MS4A6A/MS4A7	5
CC	GO:0009898	cytoplasmic side of plasma membrane	4/100	169/19594	0.0110315	0.0269658	0.0149298	CD2/LCK/LYN/PTPRC	4
CC	GO:0031225	anchored component of membrane	4/100	169/19594	0.0110315	0.0269658	0.0149298	CD14/CD2/CD48/CD52	4
CC	GO:0043202	lysosomal lumen	3/100	97/19594	0.013453	0.0323714	0.0179226	CTSK/CTSS/LIPA	3
CC	GO:0031904	endosome lumen	2/100	35/19594	0.0137515	0.0325805	0.0180384	CTSK/CTSS	2
CC	GO:0015629	actin cytoskeleton	7/100	499/19594	0.0139858	0.0326335	0.0180678	CORO1A/COTL1/HCLS1/LSP1/MARCKS/MYO1F/RAC2	7
CC	GO:0032588	trans-Golgi network membrane	3/100	100/19594	0.0145938	0.033544	0.0185719	HLA-DPA1/HLA-DPB1/HLA-DRA	3
CC	GO:0005770	late endosome	5/100	283/19594	0.0150172	0.0340095	0.0188296	CTSS/HLA-DMA/HLA-DMB/HLA-DRA/VAMP8	5
CC	GO:0030863	cortical cytoskeleton	3/100	107/19594	0.0174633	0.0389761	0.0215794	CORO1A/COTL1/HCLS1	3
CC	GO:0042101	T cell receptor complex	3/100	144/19594	0.0375045	0.08251	0.0456822	CD3D/CD8A/PTPN6	3
CC	GO:0035580	specific granule lumen	2/100	62/19594	0.0399998	0.0855551	0.0473682	LYZ/PTPN6	2
CC	GO:0046658	anchored component of plasma membrane	2/100	62/19594	0.0399998	0.0855551	0.0473682	CD14/CD2	2
MF	GO:0140375	immune receptor activity	10/95	148/18410	4.68004e-09	1.06237e-06	7.58659e-07	C3AR1/CCR1/CX3CR1/FCER1G/HLA-DPA1/HLA-DRA/IL10RA/IL13RA1/IL1R1/IL7R	10
MF	GO:0003823	antigen binding	10/95	174/18410	2.21852e-08	2.09314e-06	1.49475e-06	CD48/HLA-DPA1/HLA-DPB1/HLA-DRA/IGKC/IGLC1/IGLL5/IGLV1-44/IL7R/TRBC1	10
MF	GO:0023023	MHC protein complex binding	6/95	36/18410	2.76626e-08	2.09314e-06	1.49475e-06	CD8A/HLA-DMA/HLA-DMB/HLA-DPA1/HLA-DPB1/HLA-DRA	6
MF	GO:0023026	MHC class II protein complex binding	5/95	27/18410	2.42762e-07	1.37768e-05	9.83825e-06	HLA-DMA/HLA-DMB/HLA-DPA1/HLA-DPB1/HLA-DRA	5
MF	GO:0004896	cytokine receptor activity	6/95	97/18410	1.08999e-05	0.000494855	0.000353386	CCR1/CX3CR1/IL10RA/IL13RA1/IL1R1/IL7R	6
MF	GO:0043548	phosphatidylinositol 3-kinase binding	4/95	29/18410	1.43141e-05	0.000541551	0.000386733	CORO1A/HCST/LCK/PIK3AP1	4
MF	GO:0004252	serine-type endopeptidase activity	7/95	174/18410	3.27873e-05	0.00106325	0.000759285	C1S/CTSC/CTSK/CTSS/GZMA/GZMH/GZMK	7
MF	GO:0038024	cargo receptor activity	5/95	79/18410	5.48479e-05	0.00146517	0.00104631	CD163/ITGAM/ITGB2/MRC1/MSR1	5
MF	GO:0008236	serine-type peptidase activity	7/95	191/18410	5.92991e-05	0.00146517	0.00104631	C1S/CTSC/CTSK/CTSS/GZMA/GZMH/GZMK	7
MF	GO:0017171	serine hydrolase activity	7/95	195/18410	6.75785e-05	0.00146517	0.00104631	C1S/CTSC/CTSK/CTSS/GZMA/GZMH/GZMK	7
MF	GO:0001846	opsonin binding	3/95	16/18410	7.09994e-05	0.00146517	0.00104631	ITGAM/ITGB2/VSIG4	3
MF	GO:0005126	cytokine receptor binding	8/95	272/18410	8.20517e-05	0.00155214	0.00110842	CCL19/CCL5/CX3CR1/CXCL12/IL13RA1/PYCARD/TNFSF13/TNFSF13B	8
MF	GO:0019955	cytokine binding	6/95	141/18410	9.01115e-05	0.00157349	0.00112366	CCR1/CSF1R/CX3CR1/IL10RA/IL13RA1/IL1R1	6
MF	GO:0001848	complement binding	3/95	20/18410	0.000142386	0.00215477	0.00153877	ITGAM/ITGB2/VSIG4	3
MF	GO:0016505	peptidase activator activity involved in apoptotic process	3/95	20/18410	0.000142386	0.00215477	0.00153877	CASP1/CTSC/PYCARD	3
MF	GO:0042277	peptide binding	8/95	322/18410	0.000260789	0.00369994	0.0026422	C1QA/CD14/HLA-DPA1/HLA-DPB1/HLA-DRA/ITGAM/ITGB2/MSR1	8
MF	GO:0004175	endopeptidase activity	9/95	432/18410	0.0003924	0.0049533	0.00353725	C1S/CASP1/CTSC/CTSK/CTSS/GZMA/GZMH/GZMK/PYCARD	9
MF	GO:0004197	cysteine-type endopeptidase activity	5/95	120/18410	0.000392772	0.0049533	0.00353725	CASP1/CTSC/CTSK/CTSS/PYCARD	5
MF	GO:0042379	chemokine receptor binding	4/95	71/18410	0.000496259	0.00592899	0.00423401	CCL19/CCL5/CX3CR1/CXCL12	4
MF	GO:0034987	immunoglobulin receptor binding	4/95	80/18410	0.000779732	0.00866766	0.00618975	IGKC/IGLC1/IGLL5/TRBC1	4
MF	GO:0001540	amyloid-beta binding	4/95	81/18410	0.000817025	0.00866766	0.00618975	C1QA/ITGAM/ITGB2/MSR1	4
MF	GO:0043394	proteoglycan binding	3/95	36/18410	0.000840038	0.00866766	0.00618975	CTSK/CTSS/PTPRC	3
MF	GO:0042605	peptide antigen binding	3/95	37/18410	0.000910756	0.00898877	0.00641906	HLA-DPA1/HLA-DPB1/HLA-DRA	3
MF	GO:0033218	amide binding	8/95	402/18410	0.00112001	0.0100769	0.00719611	C1QA/CD14/HLA-DPA1/HLA-DPB1/HLA-DRA/ITGAM/ITGB2/MSR1	8
MF	GO:0032395	MHC class II receptor activity	2/95	10/18410	0.00115418	0.0100769	0.00719611	HLA-DPA1/HLA-DRA	2
MF	GO:0042608	T cell receptor binding	2/95	10/18410	0.00115418	0.0100769	0.00719611	HLA-DRA/LCK	2
MF	GO:0042169	SH2 domain binding	3/95	41/18410	0.00123101	0.0103496	0.00739089	BLNK/LCK/PTPN6	3
MF	GO:0005178	integrin binding	5/95	156/18410	0.00128595	0.0104254	0.00744498	CXCL12/ITGAM/ITGB2/LYN/SPP1	5
MF	GO:0005125	cytokine activity	6/95	235/18410	0.00136976	0.0107035	0.00764358	CCL19/CCL5/CXCL12/SPP1/TNFSF13/TNFSF13B	6
MF	GO:0016504	peptidase activator activity	3/95	43/18410	0.00141456	0.0107035	0.00764358	CASP1/CTSC/PYCARD	3
MF	GO:0003779	actin binding	8/95	439/18410	0.00195184	0.0142925	0.0102066	CORO1A/COTL1/GMFG/HCLS1/LSP1/MARCKS/MYO1F/S100A4	8
MF	GO:0008009	chemokine activity	3/95	49/18410	0.00206518	0.0146498	0.0104617	CCL19/CCL5/CXCL12	3
MF	GO:0008234	cysteine-type peptidase activity	5/95	178/18410	0.00229456	0.0149355	0.0106658	CASP1/CTSC/CTSK/CTSS/PYCARD	5
MF	GO:0005161	platelet-derived growth factor receptor binding	2/95	14/18410	0.00230284	0.0149355	0.0106658	IL1R1/LYN	2
MF	GO:0016004	phospholipase activator activity	2/95	14/18410	0.00230284	0.0149355	0.0106658	CCL5/LCK	2
MF	GO:0097153	cysteine-type endopeptidase activity involved in apoptotic process	2/95	15/18410	0.00264821	0.0166985	0.0119247	CASP1/PYCARD	2
MF	GO:0060229	lipase activator activity	2/95	16/18410	0.00301639	0.0185059	0.0132155	CCL5/LCK	2
MF	GO:0005001	transmembrane receptor protein tyrosine phosphatase activity	2/95	17/18410	0.00340712	0.0193354	0.0138078	PTPN6/PTPRC	2
MF	GO:0008656	cysteine-type endopeptidase activator activity involved in apoptotic process	2/95	17/18410	0.00340712	0.0193354	0.0138078	CASP1/PYCARD	2
MF	GO:0019198	transmembrane receptor protein phosphatase activity	2/95	17/18410	0.00340712	0.0193354	0.0138078	PTPN6/PTPRC	2
MF	GO:0043621	protein self-association	3/95	63/18410	0.00422578	0.0233964	0.0167078	CCL5/CD2/CTSC	3
MF	GO:0051015	actin filament binding	5/95	214/18410	0.00503502	0.0272131	0.0194334	CORO1A/COTL1/HCLS1/MARCKS/MYO1F	5
MF	GO:0016493	C-C chemokine receptor activity	2/95	23/18410	0.00621208	0.0320487	0.0228866	CCR1/CX3CR1	2
MF	GO:0043274	phospholipase binding	2/95	23/18410	0.00621208	0.0320487	0.0228866	BLNK/LCK	2
MF	GO:0019957	C-C chemokine binding	2/95	24/18410	0.00675417	0.034071	0.0243308	CCR1/CX3CR1	2
MF	GO:0001637	G protein-coupled chemoattractant receptor activity	2/95	26/18410	0.00790026	0.0373616	0.0266807	CCR1/CX3CR1	2
MF	GO:0004435	phosphatidylinositol phospholipase C activity	2/95	26/18410	0.00790026	0.0373616	0.0266807	CCL5/CCR1	2
MF	GO:0004950	chemokine receptor activity	2/95	26/18410	0.00790026	0.0373616	0.0266807	CCR1/CX3CR1	2
MF	GO:0003953	NAD+ nucleosidase activity	2/95	28/18410	0.0091274	0.0414384	0.029592	IL1R1/PIK3AP1	2
MF	GO:0004629	phospholipase C activity	2/95	28/18410	0.0091274	0.0414384	0.029592	CCL5/CCR1	2
MF	GO:0051219	phosphoprotein binding	3/95	88/18410	0.0106465	0.0473873	0.0338402	LCK/LYN/PTPN6	3
MF	GO:0001968	fibronectin binding	2/95	31/18410	0.0111163	0.0476111	0.0340001	CTSK/CTSS	2
MF	GO:0005164	tumor necrosis factor receptor binding	2/95	31/18410	0.0111163	0.0476111	0.0340001	TNFSF13/TNFSF13B	2
MF	GO:0019956	chemokine binding	2/95	33/18410	0.0125384	0.0527078	0.0376397	CCR1/CX3CR1	2
MF	GO:0048018	receptor ligand activity	7/95	489/18410	0.0132875	0.0548412	0.0391632	CCL19/CCL5/CXCL12/GMFG/SPP1/TNFSF13/TNFSF13B	7
MF	GO:0030546	signaling receptor activator activity	7/95	496/18410	0.014269	0.0578405	0.0413051	CCL19/CCL5/CXCL12/GMFG/SPP1/TNFSF13/TNFSF13B	7
