# Supplementary material for: Identification of m6A regulator-mediated RNA methylation modification patterns and key immune-related genes involved in atrial fibrillation
Source: Aging (Albany NY). 2023 Feb 20;15(5):1371–93. doi: 10.18632/aging.204537 (PMC10042702; doi:10.18632/aging.204537)
Supplement: Supplementary Table 7 [file aging-15-204537-s008.xlsx]

## Sheet: Sheet1
Supplementary Table 7. Detailed results of the KEGG enrichment analysis.
ID	Description	GeneRatio	BgRatio	pvalue	p.adjust	qvalue	geneID	Count
hsa04640	Hematopoietic cell lineage	13/67	99/8163	8.10677e-13	9.97133e-11	5.71741e-11	CD14/CD2/CD3D/CD8A/CSF1R/HLA-DMA/HLA-DMB/HLA-DPA1/HLA-DPB1/HLA-DRA/IL1R1/IL7R/ITGAM	13
hsa05150	Staphylococcus aureus infection	12/67	96/8163	1.22062e-11	7.5068e-10	4.30429e-10	C1QA/C1QB/C1QC/C1S/C3AR1/HLA-DMA/HLA-DMB/HLA-DPA1/HLA-DPB1/HLA-DRA/ITGAM/ITGB2	12
hsa05152	Tuberculosis	14/67	180/8163	1.3677e-10	5.07524e-09	2.91006e-09	CD14/CORO1A/CTSS/FCER1G/HLA-DMA/HLA-DMB/HLA-DPA1/HLA-DPB1/HLA-DRA/IL10RA/ITGAM/ITGB2/LSP1/MRC1	14
hsa05323	Rheumatoid arthritis	11/67	93/8163	1.74641e-10	5.07524e-09	2.91006e-09	CCL5/CTSK/CXCL12/HLA-DMA/HLA-DMB/HLA-DPA1/HLA-DPB1/HLA-DRA/ITGB2/TNFSF13/TNFSF13B	11
hsa04145	Phagosome	13/67	152/8163	2.0631e-10	5.07524e-09	2.91006e-09	CD14/CORO1A/CTSS/HLA-DMA/HLA-DMB/HLA-DPA1/HLA-DPB1/HLA-DRA/ITGAM/ITGB2/MRC1/MSR1/NCF2	13
hsa05133	Pertussis	10/67	76/8163	4.31308e-10	8.84182e-09	5.06976e-09	C1QA/C1QB/C1QC/C1S/CASP1/CD14/IRF8/ITGAM/ITGB2/PYCARD	10
hsa04672	Intestinal immune network for IgA production	8/67	49/8163	4.63264e-09	8.14021e-08	4.66747e-08	CXCL12/HLA-DMA/HLA-DMB/HLA-DPA1/HLA-DPB1/HLA-DRA/TNFSF13/TNFSF13B	8
hsa05140	Leishmaniasis	9/67	77/8163	1.00877e-08	1.55098e-07	8.89308e-08	HLA-DMA/HLA-DMB/HLA-DPA1/HLA-DPB1/HLA-DRA/ITGAM/ITGB2/NCF2/PTPN6	9
hsa05310	Asthma	6/67	31/8163	1.52543e-07	2.08476e-06	1.19537e-06	FCER1G/HLA-DMA/HLA-DMB/HLA-DPA1/HLA-DPB1/HLA-DRA	6
hsa04610	Complement and coagulation cascades	8/67	85/8163	3.91755e-07	4.81859e-06	2.76291e-06	C1QA/C1QB/C1QC/C1S/C3AR1/ITGAM/ITGB2/VSIG4	8
hsa05416	Viral myocarditis	7/67	60/8163	4.99008e-07	5.15542e-06	2.95604e-06	HLA-DMA/HLA-DMB/HLA-DPA1/HLA-DPB1/HLA-DRA/ITGB2/RAC2	7
hsa04514	Cell adhesion molecules	10/67	157/8163	5.02967e-07	5.15542e-06	2.95604e-06	CD2/CD8A/HLA-DMA/HLA-DMB/HLA-DPA1/HLA-DPB1/HLA-DRA/ITGAM/ITGB2/PTPRC	10
hsa05340	Primary immunodeficiency	6/67	38/8163	5.46805e-07	5.17362e-06	2.96647e-06	BLNK/CD3D/CD8A/IL7R/LCK/PTPRC	6
hsa05322	Systemic lupus erythematosus	9/67	136/8163	1.43058e-06	1.25687e-05	7.20667e-06	C1QA/C1QB/C1QC/C1S/HLA-DMA/HLA-DMB/HLA-DPA1/HLA-DPB1/HLA-DRA	9
hsa04064	NF-kappa B signaling pathway	8/67	104/8163	1.8544e-06	1.52061e-05	8.71893e-06	BLNK/CCL19/CD14/CXCL12/IL1R1/LCK/LYN/TNFSF13B	8
hsa04659	Th17 cell differentiation	8/67	108/8163	2.46967e-06	1.89856e-05	1.08861e-05	CD3D/HLA-DMA/HLA-DMB/HLA-DPA1/HLA-DPB1/HLA-DRA/IL1R1/LCK	8
hsa04612	Antigen processing and presentation	7/67	78/8163	3.03891e-06	2.19874e-05	1.26072e-05	CD8A/CTSS/HLA-DMA/HLA-DMB/HLA-DPA1/HLA-DPB1/HLA-DRA	7
hsa04060	Cytokine-cytokine receptor interaction	12/67	295/8163	4.0063e-06	2.73764e-05	1.56972e-05	CCL19/CCL5/CCR1/CSF1R/CX3CR1/CXCL12/IL10RA/IL13RA1/IL1R1/IL7R/TNFSF13/TNFSF13B	12
hsa04658	Th1 and Th2 cell differentiation	7/67	92/8163	9.20594e-06	5.95963e-05	3.41716e-05	CD3D/HLA-DMA/HLA-DMB/HLA-DPA1/HLA-DPB1/HLA-DRA/LCK	7
hsa04650	Natural killer cell mediated cytotoxicity	8/67	131/8163	1.04581e-05	6.43176e-05	3.68787e-05	CD48/FCER1G/HCST/ITGB2/LCK/PTPN6/RAC2/TYROBP	8
hsa05330	Allograft rejection	5/67	38/8163	1.30332e-05	7.63374e-05	4.37707e-05	HLA-DMA/HLA-DMB/HLA-DPA1/HLA-DPB1/HLA-DRA	5
hsa04061	Viral protein interaction with cytokine and cytokine receptor	7/67	100/8163	1.59745e-05	8.93119e-05	5.12101e-05	CCL19/CCL5/CCR1/CSF1R/CX3CR1/CXCL12/IL10RA	7
hsa05332	Graft-versus-host disease	5/67	42/8163	2.15354e-05	0.000115168	6.60353e-05	HLA-DMA/HLA-DMB/HLA-DPA1/HLA-DPB1/HLA-DRA	5
hsa04940	Type I diabetes mellitus	5/67	43/8163	2.42151e-05	0.000124103	7.11585e-05	HLA-DMA/HLA-DMB/HLA-DPA1/HLA-DPB1/HLA-DRA	5
hsa05320	Autoimmune thyroid disease	5/67	53/8163	6.77614e-05	0.000333386	0.000191158	HLA-DMA/HLA-DMB/HLA-DPA1/HLA-DPB1/HLA-DRA	5
hsa05164	Influenza A	8/67	171/8163	7.16661e-05	0.000339036	0.000194398	CASP1/CCL5/HLA-DMA/HLA-DMB/HLA-DPA1/HLA-DPB1/HLA-DRA/PYCARD	8
hsa05166	Human T-cell leukemia virus 1 infection	9/67	222/8163	7.50711e-05	0.000341991	0.000196092	CD3D/HLA-DMA/HLA-DMB/HLA-DPA1/HLA-DPB1/HLA-DRA/IL1R1/ITGB2/LCK	9
hsa04380	Osteoclast differentiation	7/67	128/8163	7.87308e-05	0.000345853	0.000198307	BLNK/CSF1R/CTSK/IL1R1/LCK/NCF2/TYROBP	7
hsa05134	Legionellosis	5/67	57/8163	9.63988e-05	0.000408864	0.000234436	CASP1/CD14/ITGAM/ITGB2/PYCARD	5
hsa05321	Inflammatory bowel disease	5/67	65/8163	0.000180785	0.00074122	0.000425004	HLA-DMA/HLA-DMB/HLA-DPA1/HLA-DPB1/HLA-DRA	5
hsa05169	Epstein-Barr virus infection	8/67	202/8163	0.000228152	0.000905246	0.000519054	BLNK/CD3D/HLA-DMA/HLA-DMB/HLA-DPA1/HLA-DPB1/HLA-DRA/LYN	8
hsa05145	Toxoplasmosis	6/67	112/8163	0.000294777	0.00113305	0.000649672	HLA-DMA/HLA-DMB/HLA-DPA1/HLA-DPB1/HLA-DRA/IL10RA	6
hsa04662	B cell receptor signaling pathway	5/67	82/8163	0.000536405	0.00199933	0.00114638	BLNK/LYN/PIK3AP1/PTPN6/RAC2	5
hsa04062	Chemokine signaling pathway	7/67	192/8163	0.000941711	0.00340678	0.00195339	CCL19/CCL5/CCR1/CX3CR1/CXCL12/LYN/RAC2	7
hsa05142	Chagas disease	5/67	102/8163	0.0014435	0.00507287	0.00290871	C1QA/C1QB/C1QC/CCL5/CD3D	5
hsa04660	T cell receptor signaling pathway	5/67	104/8163	0.00157383	0.00537725	0.00308323	CD3D/CD8A/LCK/PTPN6/PTPRC	5
hsa04670	Leukocyte transendothelial migration	5/67	114/8163	0.00235917	0.00784265	0.00449685	CXCL12/ITGAM/ITGB2/NCF2/RAC2	5
hsa04142	Lysosome	5/67	132/8163	0.00443945	0.0143698	0.00823942	CTSC/CTSK/CTSS/LAPTM5/LIPA	5
hsa05135	Yersinia infection	5/67	137/8163	0.00519601	0.0163874	0.00939629	CASP1/CD8A/LCK/PYCARD/RAC2	5
hsa05130	Pathogenic Escherichia coli infection	6/67	197/8163	0.005382	0.0165497	0.00948932	CASP1/HCLS1/IL1R1/MYO1F/PTPN6/PYCARD	6
hsa04936	Alcoholic liver disease	5/67	142/8163	0.00604001	0.01812	0.0103897	C1QA/C1QB/C1QC/C3AR1/CD14	5
hsa04666	Fc gamma R-mediated phagocytosis	4/67	97/8163	0.0081101	0.0233495	0.0133883	LYN/MARCKS/PTPRC/RAC2	4
hsa05417	Lipid and atherosclerosis	6/67	215/8163	0.00816285	0.0233495	0.0133883	CASP1/CCL5/CD14/LYN/NCF2/PYCARD	6
hsa05146	Amoebiasis	4/67	102/8163	0.00964857	0.0269722	0.0154654	CD14/IL1R1/ITGAM/ITGB2	4
hsa05163	Human cytomegalovirus infection	6/67	225/8163	0.010094	0.026991	0.0154762	CCL5/CCR1/CXCL12/IL10RA/IL1R1/RAC2	6
hsa04620	Toll-like receptor signaling pathway	4/67	104/8163	0.0103136	0.026991	0.0154762	CCL5/CD14/CTSK/SPP1	4
hsa04625	C-type lectin receptor signaling pathway	4/67	104/8163	0.0103136	0.026991	0.0154762	CASP1/FCER1G/LSP1/PYCARD	4
hsa05171	Coronavirus disease - COVID-19	6/67	232/8163	0.0116271	0.0297945	0.0170837	C1QA/C1QB/C1QC/C1S/C3AR1/CASP1	6
hsa04623	Cytosolic DNA-sensing pathway	3/67	63/8163	0.0147819	0.0371056	0.0212758	CASP1/CCL5/PYCARD	3
hsa05131	Shigellosis	6/67	247/8163	0.0154566	0.0380232	0.0218019	CASP1/CCL5/CD14/HCLS1/IL1R1/PYCARD	6
hsa05221	Acute myeloid leukemia	3/67	67/8163	0.0174242	0.0420231	0.0240954	CD14/CSF1R/ITGAM	3
hsa04664	Fc epsilon RI signaling pathway	3/67	68/8163	0.0181234	0.0428687	0.0245803	FCER1G/LYN/RAC2	3
hsa04613	Neutrophil extracellular trap formation	5/67	190/8163	0.0195442	0.0453573	0.0260072	CASP1/ITGAM/ITGB2/NCF2/RAC2	5
hsa05020	Prion disease	6/67	273/8163	0.0240396	0.0547569	0.0313968	C1QA/C1QB/C1QC/CCL5/NCF2/RAC2	6
hsa05235	PD-L1 expression and PD-1 checkpoint pathway in cancer	3/67	89/8163	0.0363917	0.0813851	0.046665	CD3D/LCK/PTPN6	3
